# Supplementary material for: Summarizing and exploring data of a decade of cytokinin-related transcriptomics
Source: Front Plant Sci. 2015 Feb 17;6:29. doi: 10.3389/fpls.2015.00029 (PMC4330702; doi:10.3389/fpls.2015.00029)
Supplement: Supplementary file 4 [file Table1.XLSX]

## Sheet: Legend
Supplementary Table 1: Meta analysis of transcript profiling results using CATMA microarrays
(A): List of genes upregulated after 15 minutes of cytokinin induction
(B): List of genes downregulated after 15 minutes of cytokinin induction
(C): List of genes upregulated after 2 h of cytokinin induction
(D): List of genes downregulated after 2 h of cytokinin induction
(E): List of genes upregulated at both time points, 15 min and 2 h after cytokinin induction
(F): List of genes downregulated at both time points, 15 min and 2 h after cytokinin induction
(G): The top 25 genes from (E) (equals to Table 1)
(H): Table containing values for all individual experiments
The results of of four different microarray studies in which the seedlings grown for 5 to 7 days in liquid media (1/2 MS, 1 g/L sucrose, 0.5 g/L MES, pH 5.7) before they were induced with 1 or 5 µM of the synthetic cytokinin 6-benzyladenine (BA) for the time periods indicated in minutes were collected and processed to calculate Meta Statistics values using R as described in Brenner et al. (2012).…
List of abbreviations and symbols:
BA: 6-Benzyladenine
CATMA ID: Unique identifier for each gene on the CATMA microarray
AGI: Unique gene identifier for each gene assigned by the Arabidopsis Genome Initiative
ras: Data from an experiment published in Brenner and Schmülling (2012); raw data available from the ArrayExpress database, accession E-CAGE-111
ahk: Data from an unpublished experiment; raw data available from the ArrayExpress database, accession E-MEXP-670
arr1: Data from an experiment published in Heyl et al. (2008) and Ramireddy et al. (2013); raw data available from the ArraxExpress database, accession E-ATMX-11
tup3: Data from an unpublished experiment; raw data available from the ArrayExpress database, accession E-CAGE-49
pval: p-value for an individual gene
FDR: FDR-corrected p-value
NA: data not available
Grey shaded CATMA IDs: Genes are also present on the Affymetrix microarray.
Grey shaded AGI IDs: Genes found regulated in the Affymetrix meta analysis (Brenner and Schmülling, 2012).

## Sheet: (A) BA15 up
CATMA ID	AGI	genename	description	Avg. Ratio BA15 vs. BA0	Avg. Ratio BA120 vs. BA0	Avg. Ratio BAx vs. BA0	Meta Statistics
CATMA5a58475	AT5G62920	ARR6	Encodes a Type-A response regulator that is responsive to cytokinin treatment. Its C-ter domain is very short in comparison to other Arabidopsis ARRs (17 total).	4.82586	3.08467	3.95527	129.822
CATMA3a37230	AT3G44326	CATMA3a37230	similar to F-box family protein [Arabidopsis thaliana] (TAIR:AT2G27310.1); similar to F-box protein-like [Oryza sativa (japonica cultivar-group)] (GB:BAD27806.1); contains InterPro domain Cyclin-like F-box; (InterPro:IPR001810)	2.44325	2.42383	2.43354	94.1119
CATMA4a31370	AT4G29740	AT4G29740.1	FAD-binding domain-containing protein / cytokinin oxidase family protein, similar to cytokinin oxidase, Zea mays (gi:3882018) (gi:3441978)	7.59679	6.29332	6.94505	86.4106
CATMA1a18090	AT1G19050	ARR7	ARR7 mRNA for response regulator 7, complete cds	11.7229	8.94027	10.3316	85.0874
CATMA5a43950	AT5G47980	AT5G47980.1	transferase family protein, similar to alcohol acyltransferase (Fragaria x ananassa)(GI:10121328)(PMID:10810141), deacetylvindoline 4-O-acetyltransferase (Catharanthus roseus)(GI:4091808)(PMID:9681034)	2.00401	12.2898	7.1469	80.1774
CATMA1a57750	AT1G68360	AT1G68360.1	zinc finger protein-related, similar to zinc finger protein GI:790683 from (Arabidopsis thaliana)	3.01727	2.51279	2.76503	77.0101
CATMA5a17520	AT5G19110	AT5G19110.1	extracellular dermal glycoprotein-related / EDGP-related, similar to extracellular dermal glycoprotein EDGP precursor (Daucus carota) GI:285741	2.00714	4.48321	3.24518	76.8899
CATMA2a38980	AT2G40670	ARR16	response regulator 16	2.39088	7.51023	4.95055	75.3572
CATMA5a38710	AT5G42900	AT5G42900.1	expressed protein, similar to unknown protein (pir||T05226)	2.60627	0.646161	1.62621	72.0389
CATMA1a16150	AT1G17147	CATMA1a16150	similar to VQ motif-containing protein [Arabidopsis thaliana] (TAIR:AT1G78410.1); similar to Avr9/Cf-9 rapidly elicited protein 169 [Nicotiana tabacum] (GB:AAG43552.1); contains InterPro domain VQ (InterPro:IPR008889)	2.18608	0.633642	1.40986	67.5668
CATMA4a31320	AT4G29690	AT4G29690.1	type I phosphodiesterase/nucleotide pyrophosphatase family protein, similar to SP|P22413 Ectonucleotide pyrophosphatase/phosphodiesterase 1 (Plasma-cell membrane glycoprotein PC-1) (Includes: Alkaline phosphodiesterase I (EC 3.1.4.1); Nucleotide pyro	2.09631	6.76105	4.42868	67.1612
CATMA4a25570	AT4G23750	AT4G23750.1	encodes a member of the ERF (ethylene response factor) subfamily B-5 of ERF/AP2 transcription factor family. The protein contains one AP2 domain. There are 7 members in this subfamily.	2.00851	2.58176	2.29513	64.7217
CATMA1a18050	AT1G19020	AT1G19020.1	expressed protein	2.0616	0.689632	1.37561	63.8941
CATMA1a26550	AT1G28370	AT1G28370.1	encodes a member of the ERF (ethylene response factor) subfamily B-1 of ERF/AP2 transcription factor family. The protein contains one AP2 domain. There are 15 members in this subfamily including ATERF-3, ATERF-4, ATERF-7, and leafy petiole.	6.34203	0.387259	3.36464	58.0305
CATMA5a15610	AT5G17350	AT5G17350.1	expressed protein	2.07134	0.478855	1.2751	57.3113
CATMA1a28380	AT1G30370	AT1G30370.1	lipase class 3 family protein, similar to DEFECTIVE IN ANTHER DEHISCENCE1 (Arabidopsis thaliana) GI:16215706; contains Pfam profile: PF01764: Lipase	2.2628	0.565201	1.414	56.738
CATMA4a38980	AT4G37410	AT4G37410.1	cytochrome P450, putative, similar to cytochrome p450 SP:O65790 from (Arabidopsis thaliana)	2.6329	7.58404	5.10847	56.6227
CATMA5a55595	AT5G59820	AT5G59820.1	zinc finger (C2H2 type) family protein (ZAT12), identical to zinc finger protein ZAT12 (Arabidopsis thaliana) gi|1418325|emb|CAA67232	2.35788	0.619337	1.48861	54.026
CATMA1a50390	AT1G61340	AT1G61340.1	F-box family protein, contains Pfam PF00646: F-box domain; similar to late embryogenesis abundant protein GI:1350540 from (Picea glauca)	3.50571	0.740497	2.1231	53.6321
CATMA3a43800	AT3G50800	AT3G50800.1	expressed protein	3.11186	0.670172	1.89102	52.5961
CATMA4a31330	AT4G29700	AT4G29700.1	type I phosphodiesterase/nucleotide pyrophosphatase family protein, similar to SP|P22413 Ectonucleotide pyrophosphatase/phosphodiesterase 1 (Plasma-cell membrane glycoprotein PC-1) (Includes: Alkaline phosphodiesterase I (EC 3.1.4.1); Nucleotide pyro	2.26456	4.56368	3.41412	50.8423
CATMA4a31410	AT4G29780	AT4G29780.1	expressed protein	6.0375	0.464889	3.25119	50.3812
CATMA5a24340	AT5G26920	AT5G26920.1	similar to calmodulin-binding protein [Arabidopsis thaliana] (TAIR:At4g25800.1); similar to putative calmodulin-binding protein [Oryza sativa (japonica cultivar-group)] (GB:BAD27989.1)	3.01066	0.747179	1.87892	50.3137
CATMA5a43215	AT5G47230	AT5G47230.1	encodes a member of the ERF (ethylene response factor) subfamily B-3 of ERF/AP2 transcription factor family (ATERF-5). The protein contains one AP2 domain. There are 18 members in this subfamily including ATERF-1, ATERF-2, AND ATERF-5.	2.15091	0.356228	1.25357	49.2108
CATMA2a24120	AT2G25735	AT2G25735.1	expressed protein	2.30005	0.977081	1.63857	49.0677
CATMA2a22170	AT2G23810	AT2G23810.1	similar to senescence-associated family protein [Arabidopsis thaliana] (TAIR:At4g30430.1); similar to senescence-associated protein DH [Zea mays] (GB:AAV31120.1); contains InterPro domain CD9/CD37/CD63 antigen (InterPro:IPR000301)	2.254	0.87398	1.56399	49.0228
CATMA5a47120	AT5G51190	AT5G51190.1	encodes a member of the ERF (ethylene response factor) subfamily B-3 of ERF/AP2 transcription factor family. The protein contains one AP2 domain. There are 18 members in this subfamily including ATERF-1, ATERF-2, AND ATERF-5.	15.4544	0.386867	7.92064	48.3531
CATMA4a25620	AT4G23800	AT4G23800.1	high mobility group (HMG1/2) family protein, similar to HMG2B (Homo sapiens) GI:32335; contains Pfam profile PF00505: HMG (high mobility group) box	2.17212	0.627569	1.39984	47.5246
CATMA1a06190	AT1G07135	AT1G07135.1	glycine-rich protein	2.00366	0.382143	1.1929	46.4633
CATMA4a25630	AT4G23800	AT4G23800.1	high mobility group (HMG1/2) family protein, similar to HMG2B (Homo sapiens) GI:32335; contains Pfam profile PF00505: HMG (high mobility group) box	2.0041	0.700238	1.35217	46.3738
CATMA2a00940	AT2G01890	AT2G01890.1	purple acid phosphatase, putative, contains Pfam profile: PF00149 calcineurin-like phosphoesterase; identical to purple acid phosphatase (GI:20257479) (Arabidopsis thaliana);	2.11955	3.12	2.61978	44.0884
CATMA1a16200	AT1G17190	AT1G17190.1	glutathione S-transferase, putative, One of three repeated glutathione transferases. 65% identical to glutathione transferase (Arabidopsis thaliana) (gi|4006934). Location of est 141C5T7 (gb|T46669); supported by fl cDNA gi:14326476gb:AF385691.	2.49559	3.32668	2.91113	43.7904
CATMA5a41290	AT5G45340	AT5G45340.1	cytochrome P450 family protein, similar to SP|Q42569|C901_ARATH Cytochrome P450 90A1 (SP:Q42569) (Arabidopsis thaliana); contains Pfam profile: PF00067: Cytochrome P450	3.09395	1.99637	2.54516	43.5986
CATMA1a14030	AT1G15040	AT1G15040.1	glutamine amidotransferase-related	2.39685	0.716874	1.55686	43.2956
CATMA2a39655	AT2G41310	ARR8	Encodes an A- type response Regulator that is primarily expressed in the root and is involved in cytokinin-mediated signalling.	2.67557	4.49817	3.58687	42.9733
CATMA5a52970	AT5G57220	AT5G57220.1	cytochrome P450, putative, similar to Cytochrome P450 (SP:O65790) (Arabidopsis thaliana); Cytochrome P450 (GI:7415996) (Lotus japonicus)	2.14538	0.699371	1.42238	42.7636
CATMA2a22930	AT2G24600	AT2G24600.1	ankyrin repeat family protein, contains ankyrin repeats, Pfam:PF00023	3.11351	0.694017	1.90376	42.3711
CATMA4a41340	AT4G39950	AT4G39950.1	cytochrome P450 79B2, putative (CYP79B2), identical to cytochrome P450 (79B2) SP:O81346 from (Arabidopsis thaliana)	2.06681	1.8778	1.9723	39.9206
CATMA4a25920	AT4G24190	AT4G24190.1	shepherd protein (SHD) / clavata formation protein, putative, nearly identical to SHEPHERD (Arabidopsis thaliana) GI:19570872; contains Pfam profiles PF02518: ATPase, histidine kinase-, DNA gyrase B-, and HSP90-like domain protein, PF00183: Hsp90 pro	2.07924	2.9148	2.49702	39.7752
CATMA1a41350	AT1G50280	AT1G50280.1	phototropic-responsive NPH3 family protein, contains NPH3 family domain, Pfam:PF03000	5.76435	9.10795	7.43615	39.6708
CATMA3a09980	AT3G10930	AT3G10930.1	expressed protein	2.41855	0.481278	1.44991	39.5451
CATMA2a25440	AT2G27080	AT2G27080.1	harpin-induced protein-related / HIN1-related / harpin-responsive protein-related, contains 1 transmembrane domain; similar to hin1 homolog (GI:13122296) (Arabidopsis thaliana); similar to hin1 (GI:22830759) (Nicotiana tabacum)	2.29398	0.890764	1.59237	37.9579
CATMA5a21760	AT5G24210	AT5G24210.1	lipase class 3 family protein, contains Pfam profile PF01764: Lipase	2.26459	1.38095	1.82277	36.238
CATMA4a35800	AT4G33980	AT4G33980.1	expressed protein	2.34236	0.560644	1.4515	36.1884
CATMA3a48950	AT3G55980	AT3G55980.1	zinc finger (CCCH-type) family protein, contains Pfam domain, PF00642: Zinc finger C-x8-C-x5-C-x3-H type (and similar) and Pfam domain, PF00023: Ankyrin repeat	6.77323	0.739578	3.75641	35.4124
CATMA4a36550	AT4G34760	AT4G34760.1	auxin-responsive family protein, auxin-induced protein X15, Glycine max, PIR2:JQ1097	2.25681	1.32312	1.78997	35.3466
CATMA5a35240	AT5G39670	AT5G39670.1	calcium-binding EF hand family protein, contains INTERPRO:IPR002048 calcium-binding EF-hand domain	2.12813	1.24533	1.68673	34.7501
CATMA1a44090	AT1G53060	AT1G53060.1	legume lectin family protein	2.11957	16.159	9.13929	34.5725
CATMA3a52160	AT3G59110	AT3G59110.1	protein kinase family protein, contains protein kinase domain, Pfam:PF00069	2.53344	0.897346	1.71539	33.9316
CATMA1a26300	AT1G28100	AT1G28100.1	expressed protein	2.82959	3.7957	3.31265	33.7212
CATMA3a52020	AT3G58990	AT3G58990.1	aconitase C-terminal domain-containing protein, contains Pfam profile PF00694: Aconitase C-terminal domain	3.86195	2.2164	3.03918	32.9527
CATMA5a04390	AT5G05190	AT5G05190.1	expressed protein, similar to unknown protein (emb|CAB88044.1)	2.02727	1.55193	1.7896	32.7671
CATMA5a61570	AT5G66210	AT5G66210.1	calcium-dependent protein kinase family protein / CDPK family protein, contains Pfam domains, PF00069: Protein kinase domain and PF00036: EF hand	2.71432	2.13358	2.42395	32.6154
CATMA1a17855	AT1G18800	AT1G18800.1	nucleosome assembly protein (NAP) family protein, similar to SP|Q01105|SET protein (HLA-DR associated protein II) (PHAPII) (Phosphatase 2A inhibitor I2PP2A) {Homo sapiens}; contains Pfam profile PF00956: Nucleosome assembly protein (NAP)	2.28197	2.54219	2.41208	32.4782
CATMA5a37190	AT5G41590	AT5G41590.1	expressed protein, contains Pfam profile PF04525: Protein of unknown function (DUF567)	2.1311	2.17566	2.15338	32.4012
CATMA1a60130	AT1G70850	AT1G70850.1	Bet v I allergen family protein, similar to Csf-2 (Cucumis sativus)(GI:5762258)(J Am Soc Hortic Sci 124, 136-139 (1999)) contains Pfam profile PF00407: Pathogenesis-related protein Bet v I family	2.35169	1.37449	1.86309	32.1049
CATMA4a18523	AT4G17490	AT4G17490.1	encodes a member of the ERF (ethylene response factor) subfamily B-3 of ERF/AP2 transcription factor family (ATERF-6). The protein contains one AP2 domain. There are 18 members in this subfamily including ATERF-1, ATERF-2, AND ATERF-5.	2.91287	0.463001	1.68794	31.5694
CATMA3a18390	AT3G18773	AT3G18773.1	zinc finger (C3HC4-type RING finger) family protein, contains Pfam profile: PF00097 zinc finger, C3HC4 type (RING finger)	4.19872	4.19245	4.19559	31.5506
CATMA5a07985	AT5G08640	AT5G08640.1	flavonol synthase 1 (FLS1), identical to SP|Q96330; contains PF03171 2OG-Fe(II) oxygenase superfamily	3.80287	6.57239	5.18763	31.1484
CATMA1a20470	AT1G21400	AT1G21400.1	2-oxoisovalerate dehydrogenase, putative / 3-methyl-2-oxobutanoate dehydrogenase, putative / branched-chain alpha-keto acid dehydrogenase E1 alpha subunit, putative, similar to branched-chain alpha-keto acid dehydrogenase E1-alpha subunit (Gallus gal	2.60107	1.09523	1.84815	30.9618
CATMA1a28090	AT1G30070	AT1G30070.1	SGS domain-containing protein, similar to calcyclin binding protein (Mus musculus) GI:3142331; contains Pfam profile PF05002: SGS domain	2.09118	5.45872	3.77495	30.7503
CATMA1a17310	AT1G18300	AT1G18300.1	MutT/nudix family protein, similar to SP|Q09790 Diadenosine 5',5'''-P1,P6-hexaphosphate hydrolase (EC 3.6.1.-) (Ap6A hydrolase) {Schizosaccharomyces pombe}; contains Pfam profile PF00293: NUDIX domain	2.12519	1.11795	1.62157	29.6558
CATMA2a32040	AT2G33840	AT2G33840.1	tRNA synthetase class I (W and Y) family protein, similar to SP|P54577 Tyrosyl-tRNA synthetase (EC 6.1.1.1) (Tyrosyl--tRNA ligase) (TyrRS) {Homo sapiens}; contains Pfam profile PF00579: tRNA synthetases class I (W and Y)	2.91991	3.64413	3.28202	29.4269
CATMA5a11800	AT5G13570	AT5G13570.1	MutT/nudix family protein, similar to mRNA-decapping enzyme (Homo sapiens) GI:23268269; contains Pfam profile PF00293: NUDIX domain	4.51424	2.72236	3.6183	28.4397
CATMA4a26790	AT4G25100	AT4G25100.1	superoxide dismutase (Fe), chloroplast (SODB) / iron superoxide dismutase (FSD1), identical to Fe-superoxide dismutase (Arabidopsis thaliana) gi|166700|gb|AAA32791; supported by cDNA, Ceres:32935	2.28445	1.07676	1.68061	28.3766
CATMA4a01180	AT4G01010	AT4G01010.1	cyclic nucleotide-regulated ion channel, putative (CNGC13), similar to CaM-regulated potassium ion channel (ACBK1) GI:8515883 from (Arabidopsis thaliana)	5.34987	2.7887	4.06928	27.6662
CATMA3a18300	AT3G18680	AT3G18680.1	aspartate/glutamate/uridylate kinase family protein, similar to UMP-kinase GB:CAB38122 gi:4468612 from (Lactococcus lactis) ; contains Pfam profile PF00696: Amino acid kinase family	2.49271	0.996704	1.74471	27.5382
CATMA1a67960	AT1G78860	AT1G78860.1	curculin-like (mannose-binding) lectin family protein, low similarity to Ser/Thr protein kinase (Zea mays) GI:2598067; contains Pfam profile PF01453: Lectin (probable mannose binding) but not the protein kinase domain of the Z. mays protein	2.08001	1.28295	1.68148	26.852
CATMA3a41120	AT3G48090	AT3G48090.1	disease resistance protein (EDS1), identical to disease resistance protein/lipase homolog EDS1 GI:4454567; contains Pfam profile PF01764: Lipase	2.15396	1.17064	1.6623	25.9782
CATMA1a24000	AT1G25350	AT1G25350.1	glutamine-tRNA ligase, putative / glutaminyl-tRNA synthetase, putative / GlnRS, putative, similar to tRNA-glutamine synthetase GI:2995454 from (Lupinus luteus)	2.321	1.97706	2.14903	25.9457
CATMA5a41760	AT5G45775	AT5G45775.1	60S ribosomal protein L11 (RPL11D)	2.32169	2.80471	2.5632	25.7913
CATMA5a17690	AT5G19260	AT5G19260.1	expressed protein, various predicted proteins	2.233	2.38957	2.31128	25.6481
CATMA4a24180	AT4G22460	AT4G22460.1	protease inhibitor/seed storage/lipid transfer protein (LTP) family protein, contains Pfam profile: PF00234 protease inhibitor/seed storage/LTP family	2.15256	1.33915	1.74585	25.519
CATMA1a43160	AT1G52100	AT1G52100.1	jacalin lectin family protein, similar to myrosinase-binding protein homolog (Arabidopsis thaliana) GI:2997767; contains Pfam profile PF01419 jacalin-like lectin domain; contains non-consensus AG donor splice site at exon3	2.50077	1.33046	1.91561	25.4434
CATMA1a67470	AT1G78370	AT1G78370.1	glutathione S-transferase, putative, similar to 2,4-D inducible glutathione S-transferase GI:2920666 from (Glycine max)	2.19742	1.39217	1.79479	24.8507
CATMA1a50960	AT1G61890	AT1G61890.1	MATE efflux family protein, similar to ripening regulated protein DDTFR18 (Lycopersicon esculentum) GI:12231296; contains Pfam profile PF01554: Uncharacterized membrane protein family	2.31572	1.82737	2.07155	24.6808
CATMA4a18930	AT4G17900	AT4G17900.1	zinc-binding family protein, similar to zinc-binding protein (Pisum sativum) GI:16117799; contains Pfam profile PF04640 : Protein of unknown function, DUF597	2.02604	0.684261	1.35515	24.5788
CATMA2a29230	AT2G31060	AT2G31060.1	elongation factor family protein, contains Pfam profiles: PF00009 elongation factor Tu GTP binding domain, PF00679 elongation factor G C-terminus, PF03144 elongation factor Tu domain 2	2.37141	2.58363	2.47752	24.1137
CATMA1a45030	AT1G53920	AT1G53920.1	GDSL-motif lipase/hydrolase family protein, similar to Anther-specific proline-rich proteins SP|P40603 SP|P40602 from {Arabidopsis thaliana}; contains Pfam profile PF00657: GDSL-like Lipase/Acylhydrolase	2.11205	3.01263	2.56234	24.0368
CATMA1a44600	AT1G53590	AT1G53590.1	C2 domain-containing protein	2.45807	2.71373	2.5859	23.5089
CATMA1a15390	AT1G16400	AT1G16400.1	cytochrome P450 family protein, similar to gb|AF069494 cytochrome P450 from Sinapis alba and is a member of the PF|00067 Cytochrome P450 family; identical to cytochrome P450 CYP79F2 (CYP79F2) GI:10946207	2.47111	3.00397	2.73754	23.3722
CATMA3a03160	AT3G04210	AT3G04210.1	disease resistance protein (TIR-NBS class), putative, domain signature TIR-NBS exists, suggestive of a disease resistance protein.	6.4271	1.00103	3.71406	23.037
CATMA3a37170	AT3G44260	AT3G44260.1	CCR4-NOT transcription complex protein, putative, similar to SWISS-PROT:Q9UFF9 CCR4-NOT transcription complex, subunit 8 (CAF1-like protein, CALIFp) (Homo sapiens)	3.08034	0.545142	1.81274	22.7688
CATMA1a56810	AT1G67470	AT1G67470.1	protein kinase family protein, contains protein kinase domain, Pfam:PF00069	2.01201	1.27197	1.64199	22.6786
CATMA1a67950	AT1G78850	AT1G78850.1	curculin-like (mannose-binding) lectin family protein, low similarity to ser/thr protein kinase from Zea mays (GI:2598067); contains Pfam lectin (probable mannose binding) domain PF01453 but not the protein kinase domain of the Z. mays protein	2.35444	2.11891	2.23667	22.4137
CATMA5a50340	AT5G54490	AT5G54490.1	calcium-binding EF-hand protein, putative, similar to EF-hand Ca2+-binding protein CCD1 (Triticum aestivum) GI:9255753; contains INTERPRO:IPR002048 calcium-binding EF-hand domain	2.88337	0.467437	1.6754	22.1378
CATMA2a27920	AT2G29560	AT2G29560.1	enolase, putative, similar to enolase (Spinacia oleracea) gi|8919731|emb|CAB96173	2.20671	2.11457	2.16064	21.9995
CATMA3a48410	AT3G55450	AT3G55450.1	protein kinase, putative, similar to protein kinase APK1B (Arabidopsis thaliana) SWISS-PROT:P46573	2.33069	1.86012	2.09541	21.9643
CATMA4a36700	AT4G34910	AT4G34910.1	DEAD/DEAH box helicase, putative (RH16), identical to cDNA DEAD box RNA helicase, RH16 GI:3776006	2.28169	3.18725	2.73447	21.8893
CATMA2a35160	AT2G36885	AT2G36885.1	expressed protein	2.26683	3.43365	2.85024	21.8625
CATMA1a20670	AT1G21600	AT1G21600.1	expressed protein, similar to hypothetical protein GB:AAD41412 GI:5263310 from (Arabidopsis thaliana)	2.40954	2.03715	2.22334	21.8622
CATMA4a11095	AT4G11010	AT4G11010.1	nucleoside diphosphate kinase 3, mitochondrial (NDK3), identical to Nucleoside diphosphate kinase III, mitochondrial precursor (NDK III) (NDP kinase III) (NDPK III) (SP:O49203) (Arabidopsis thaliana); contains Pfam PF00334 : Nucleoside diphosphate k	3.07665	2.03195	2.5543	21.7592
CATMA1a10670	AT1G11670	AT1G11670.1	MATE efflux family protein, similar to ripening regulated protein DDTFR18 (Lycopersicon esculentum) GI:12231296; contains Pfam profile PF01554: Uncharacterized membrane protein family; EST gb|W43487 comes from this gene	3.36001	2.99451	3.17726	21.4634
CATMA1a42790	AT1G51700	ADOF1	adof1 mRNA for dof zinc finger protein, complete cds	2.41684	1.14708	1.78196	21.3926
CATMA2a36695	AT2G38400	AGT3	alanine:glyoxylate aminotransferase 2 homolog (AGT3) mRNA,	2.92722	2.37332	2.65027	21.3036
CATMA3a28630	AT3G28730	AT3G28730.1	structure-specific recognition protein 1 / high mobility group protein / HMG protein, nearly identical to SP|Q05153 Structure-specific recognition protein 1 homolog (HMG protein) {Arabidopsis thaliana}; contains Pfam profile PF00505: HMG (high mobili	2.98044	2.03014	2.50529	21.1232
CATMA3a23160	AT3G23170	AT3G23170.1	expressed protein	5.79382	1.88487	3.83934	20.9928
CATMA1a51245	AT1G62180	37347	Encodes a protein disulfide isomerase-like (PDIL) protein, a member of a multigene family within the thioredoxin (TRX) superfamily. This protein also belongs to the adenosine 5'-phosphosulfate reductase-like (APRL) group.	2.81824	2.79463	2.80644	20.9764
CATMA1a67930	AT1G78830	AT1G78830.1	curculin-like (mannose-binding) lectin family protein, similar to S glycoprotein (Brassica rapa) GI:2351186; contains Pfam profile PF01453: Lectin (probable mannose binding)	3.0176	1.63093	2.32427	20.9712
CATMA4a06600	AT4G07410	AT4G07410.1	transducin family protein / WD-40 repeat family protein, contains 7 WD-40 repeats (PF00400) (2 weak); similar to Vegetatible incompatibility protein HET-E-1 (SP:Q00808) {Podospora anserina}	2.10538	2.10184	2.10361	20.8848
CATMA5a52120	AT5G56320	AT5G56320.1	expansin, putative (EXP14), similar to alpha-expansin 3 GI:6942322 from (Triphysaria versicolor); alpha-expansin gene family, PMID:11641069	2.51115	1.53597	2.02356	20.8217
CATMA2a43860	AT2G45460	AT2G45460.1	forkhead-associated domain-containing protein / FHA domain-containing protein	2.31656	2.66437	2.49046	20.4397
CATMA5a22580	AT5G24890	AT5G24890.1	expressed protein, weak similarity to MTD1 (Medicago truncatula) GI:9294810	2.51501	1.59712	2.05607	20.4113
CATMA1a67640	AT1G78570	AT1G78570.1	NAD-dependent epimerase/dehydratase family protein, similar to dTDP-glucose 4,6-dehydratase from Aneurinibacillus thermoaerophilus GI:16357461, RmlB from Leptospira borgpetersenii GI:4234803; contains Pfam profile PF01370 NAD dependent epimerase/dehy	3.68664	2.91918	3.30291	20.3906
CATMA5a19900	AT5G22440	AT5G22440.1	60S ribosomal protein L10A (RPL10aC)	2.80812	2.28179	2.54495	20.1214
CATMA1b17040	AT1G18040	AT1G18040.1	cell division protein kinase, putative, similar to cell division protein kinase 7 (Homo sapiens) SWISS-PROT:P50613	2.23309	2.20984	2.22146	20.003
CATMA2a36760	AT2G38470	AT2G38470.1	WRKY family transcription factor, contains Pfam profile: PF03106 WRKY DNA -binding domain;	2.28451	1.06934	1.67693	19.9145
CATMA1a50950	AT1G61870	AT1G61870.1	pentatricopeptide (PPR) repeat-containing protein, contains Pfam profile PF01535: PPR repeat	3.2023	2.83124	3.01677	19.9047
CATMA3a53290	AT3G60260	AT3G60260.1	phagocytosis and cell motility protein ELMO1-related, contains weak similarity to ELMO1 (Mus musculus) gi|16118551|gb|AAL14464	3.47211	1.64752	2.55981	19.7429
CATMA1a44825	AT1G53750	AT1G53750.1	26S proteasome AAA-ATPase subunit (RPT1a), similar to 26S proteasome ATPase subunit GI:1395190 from (Spinacia oleracea)	3.1395	2.47845	2.80897	19.4744
CATMA4a36560	AT4G34770	AT4G34770.1	auxin-responsive family protein, similar to auxin-induced protein X10A (SP:P33080) (Glycine max); small auxin up-regulated RNA, Malus domestica, gb:Z93766	2.53	0.501567	1.51578	19.4722
CATMA1a57210	AT1G67810	AT1G67810.1	Fe-S metabolism associated domain-containing protein, contains Pfam PF02657: Fe-S metabolism associated domain	2.43881	2.30527	2.37204	19.4526
CATMA1a60190	AT1G70900	AT1G70900.1	expressed protein	2.01052	0.929938	1.47023	19.3632
CATMA5a08110	AT5G09300	AT5G09300.1	2-oxoisovalerate dehydrogenase, putative / 3-methyl-2-oxobutanoate dehydrogenase, putative / branched-chain alpha-keto acid dehydrogenase E1 alpha subunit, putative, similar to branched-chain alpha-keto acid dehydrogenase E1-alpha subunit (Gallus gal	2.11823	1.0435	1.58087	19.2985
CATMA4a29540	AT4G27900	AT4G27900.1	expressed protein	2.44998	1.2759	1.86294	19.2801
CATMA4a32090	AT4G30480	AT4G30480.1	tetratricopeptide repeat (TPR)-containing protein, similar to SP|Q99614 Tetratricopeptide repeat protein 1 {Homo sapiens}; contains Pfam profile PF00515: TPR Domain	5.37254	3.28683	4.32969	19.1891
CATMA1a63290	AT1G73940	AT1G73940.1	expressed protein	2.28694	1.99436	2.14065	19.1151
CATMA4a02690	AT4G02400	AT4G02400.1	U3 ribonucleoprotein (Utp) family protein, contains Pfam profile: PF04615 Utp14 protein	2.2699	1.99737	2.13363	18.7346
CATMA1a26140	AT1G27960	AT1G27960.1	expressed protein, contains Pfam profile PF04146: YT521-B-like family	2.05895	1.84358	1.95127	18.5142
CATMA2a25540	AT2G27170	AT2G27170.1	similar to SMC2-like condensin, putative (SMC2) (TITAN3) [Arabidopsis thaliana] (TAIR:At5g62410.1); similar to cohesin complex subunit [Gallus gallus] (GB:NP_989848.1); similar to chondroitin sulfate proteoglycan 6 [Mus musculus] (GB:NP_031816.2); si	2.4029	2.59881	2.50086	18.3399
CATMA4a39130	AT4G37590	AT4G37590.1	phototropic-responsive NPH3 family protein, contains NPH3 family domain, Pfam:PF03000	3.15545	2.57058	2.86302	18.1221
CATMA1a03060	AT1G04190	AT1G04190.1	tetratricopeptide repeat (TPR)-containing protein, low similarity to protein antigen LmSTI1 (Leishmania major) GI:1698880; contains Pfam profile PF00515 TPR Domain; EST gb|Z47802 and gb|Z48402 come from this gene	2.19465	2.38266	2.28865	18.0594
CATMA4a31860	AT4G30240	AT4G30240.1	expressed protein, predicted protein, Arabidopsis thaliana	2.16405	1.34978	1.75692	18.0415
CATMA1a19830	AT1G20770	AT1G20770.1	expressed protein	3.0031	2.4586	2.73085	18.0198
CATMA3a48860	AT3G55880	AT3G55880.1	expressed protein	3.73873	1.93673	2.83773	17.755
CATMA5a36800	AT5G41140	AT5G41140.1	expressed protein	2.09205	1.13088	1.61146	17.723
CATMA5a46540	AT5G50550	AT5G50550.1	WD-40 repeat family protein / St12p protein, putative, contains 4 WD-40 repeats (PF0400); similar to St12p protein GI:166878 (Arabidopsis thaliana)	2.00471	1.89277	1.94874	17.6916
CATMA4a15100	AT4G14700	AT4G14700.1	replication control protein, putative, similar to origin recognition complex subunit 1 (Replication control protein 1) (Homo sapiens) SWISS-PROT:Q13415	2.38433	2.31147	2.3479	17.6314
CATMA3a11960	AT3G12965	CATMA3a11960	Unknown gene	2.83688	2.3629	2.59989	17.5551
CATMA1a50850	AT1G61770	AT1G61770.1	DNAJ heat shock N-terminal domain-containing protein, similar to SP|Q9UBS4 DnaJ homolog subfamily B member 11 precursor Homo sapiens; contains Pfam profile PF00226 DnaJ domain	3.62463	1.71024	2.66743	17.4048
CATMA3a48290	AT3G55280	AT3G55280.1	60S ribosomal protein L23A (RPL23aB), various ribosomal L23a proteins	2.21157	1.45598	1.83377	16.9826
CATMA4a23570	AT4G21890	AT4G21890.1	expressed protein	4.33012	4.9408	4.63546	16.9244
CATMA5a43910	AT5G47940	AT5G47940.1	expressed protein	2.57038	2.57362	2.572	16.8729
CATMA2a44150	AT2G45750	AT2G45750.1	dehydration-responsive family protein, similar to early-responsive to dehydration stress ERD3 protein (Arabidopsis thaliana) GI:15320410; contains Pfam profile PF03141: Putative methyltransferase	2.29604	1.53566	1.91585	16.8586
CATMA5a37260	AT5G41670	AT5G41670.1	6-phosphogluconate dehydrogenase family protein, contains Pfam profiles: PF00393 6-phosphogluconate dehydrogenase C-terminal domain, PF03446 NAD binding domain of 6-phosphogluconate	2.55385	1.8481	2.20098	16.7079
CATMA4a20380	AT4G19190	AT4G19190.1	zinc knuckle (CCHC-type) family protein, contains Pfam domain, PF00098: Zinc knuckle	2.49021	1.77255	2.13138	16.6662
CATMA3a13920	AT3G14600	AT3G14600.1	60S ribosomal protein L18A (RPL18aC), similar to GB:CAA08791 from (Podocoryne carnea)	2.68118	1.73181	2.2065	16.4777
CATMA2a24880	AT2G26560	AT2G26560.1	patatin, putative, similar to patatin-like latex allergen (Hevea brasiliensis)(PMID:10589016); contains patatin domain PF01734	2.53185	0.305586	1.41872	16.4635
CATMA2a44130	AT2G45730	AT2G45730.1	eukaryotic initiation factor 3 gamma subunit family protein, contains Pfam profile PF04189: Eukaryotic initiation factor 3, gamma subunit	2.96182	2.3688	2.66531	16.4063
CATMA4a31835	AT4G30210	AT4G30210.1	NADPH-cytochrome p450 reductase, putative / NADPH-ferrihemoprotein reductase, putative, similar to NADPH-cytochrome P450 oxydoreductase from (Populus balsamifera subsp. trichocarpa x Populus deltoides) GI:13183564, GI:13183566	2.23384	1.11425	1.67405	16.3839
CATMA4a32140	AT4G30530	AT4G30530.1	defense-related protein, putative, strong similarity to defense-related protein (Brassica carinata) GI:14009290; contains Pfam profile PF00117: glutamine amidotransferase class-I	2.3506	1.62947	1.99003	16.259
CATMA1a01750	AT1G02816	AT1G02816.1	expressed protein, contains Pfam profile PF04398: Protein of unknown function, DUF538	3.13537	1.45625	2.29581	16.1812
CATMA1a16515	AT1G17470	AT1G17470.1	developmentally regulated GTP-binding protein (DRG1), identical to developmentally regulated GTP binding protein (DRG1) (Arabidopsis thaliana) GI:2345150	2.22095	1.65125	1.9361	16.0531
CATMA3a08160	AT3G09300	AT3G09300.1	oxysterol-binding family protein, similar to SP|P22059 Oxysterol-binding protein 1 {Homo sapiens}; contains Pfam profile PF01237: Oxysterol-binding protein	2.71433	1.5891	2.15172	15.9979
CATMA2a03130	AT2G04160	AIR3	isolated from differential screening of a cDNA library from auxin-treated root culture. encodes a protein similar to subtilisin-like serine protease which is believed to be active outside the plant cell.	2.58606	1.96252	2.27429	15.8447
CATMA3a01490	AT3G02530	AT3G02530.1	chaperonin, putative, similar to SWISS-PROT:P80317- T-complex protein 1, zeta subunit (TCP-1-zeta) (Mus musculus); contains Pfam:PF00118 domain, TCP-1/cpn60 chaperonin family	2.26222	2.00891	2.13556	15.8114
CATMA1a65120	AT1G75850	AT1G75850.1	similar to vacuolar protein sorting-associated protein 35 family protein / VPS35 family protein [Arabidopsis thaliana] (TAIR:At3g51310.1); similar to vacuolar protein sorting-associated protein 35 family protein / VPS35 family protein [Arabidopsis th	2.1671	1.39678	1.78194	15.7817
CATMA1a20630	AT1G21560	AT1G21560.1	expressed protein, similar to hypothetical protein [Arabidopsis thaliana] (TAIR:At4g01170.1); similar to unknown protein [Oryza sativa (japonica cultivar-group)] (GB:AAV24769.1)	3.30855	3.81558	3.56206	15.7633
CATMA1a46560	AT1G55450	AT1G55450.1	embryo-abundant protein-related, similar to embryo-abundant protein GI:1350531 from (Picea glauca)	2.45767	1.08513	1.7714	15.6674
CATMA2a18610	AT2G20142	AT2G20142.1	expressed protein	2.61032	0.856115	1.73322	15.648
CATMA5a42210	AT5G46210	AT5G46210.1	cullin, putative, similar to SP|Q13619 Cullin homolog 4A (CUL-4A) {Homo sapiens}; contains Pfam profile PF00888: Cullin family	2.04064	1.65196	1.8463	15.5844
CATMA4a19990	AT4G18880	AT-HSFA4A	member of Heat Stress Transcription Factor (Hsf) family	4.9721	1.38782	3.17996	15.5805
CATMA2a22260	AT2G23930	AT2G23930.1	small nuclear ribonucleoprotein G, putative / snRNP-G, putative / Sm protein G, putative, similar to small nuclear ribonucleoprotein G (snRNP-G, Sm protein G, Sm-G, SmG) (Homo sapiens) SWISS-PROT:Q15357	2.49424	1.94374	2.21899	15.5572
CATMA5a58460	AT5G62900	AT5G62900.1	expressed protein	3.97602	3.89175	3.93388	15.5103
CATMA3a41340	AT3G48360	AT3G48360.1	speckle-type POZ protein-related, contains Pfam PF00651 : BTB/POZ domain; similar to Speckle-type POZ protein (SP:O43791) (Homo sapiens)	2.42946	0.896473	1.66297	15.4743
CATMA3a07780	NA	CATMA3a07780	NA	2.11671	1.95939	2.03805	15.4412
CATMA3a52990	AT3G59990	AT3G59990.1	methionyl aminopeptidase, putative / methionine aminopeptidase, putative / peptidase M, putative, similar to Methionine aminopeptidase 2 (EC 3.4.11.18) from {Rattus norvegicus} SP|P38062, {Homo sapiens} SP|P50579; contains Pfam profile PF00557: metal	2.56341	1.94	2.2517	15.2771
CATMA5a08920	AT5G10160	AT5G10160.1	beta-hydroxyacyl-ACP dehydratase, putative, similar to beta-hydroxyacyl-ACP dehydratase from Toxoplasma gondii (GI:3850997); contains Pfam profile PF01377 Thioester dehydratase	2.01042	0.881629	1.44602	15.1407
CATMA4a20320	AT4G19140	AT4G19140.1	expressed protein	2.40903	1.51827	1.96365	15.0358
CATMA3a04940	AT3G05910	AT3G05910.1	pectinacetylesterase, putative, similar to pectinacetylesterase precursor GI:1431629 from (Vigna radiata)	2.6376	1.77528	2.20644	15.0221
CATMA1a65265	AT1G76030	AT1G76030.1	vacuolar ATP synthase subunit B / V-ATPase B subunit / vacuolar proton pump B subunit / V-ATPase 57 kDa subunit, identical to SP|P11574 Vacuolar ATP synthase subunit B (EC 3.6.3.14) (V-ATPase B subunit) (Vacuolar proton pump B subunit) (V-ATPase 57 k	2.58163	2.32541	2.45352	14.7804
CATMA5a13840	AT5G15600	AT5G15600.1	expressed protein	2.4204	1.06096	1.74068	14.7314
CATMA5a07935	AT5G08590	ASK2	encodes a plant protein kinase similar to the calcium/calmodulin-dependent protein kinase subfamily and the SNF1 kinase subfamily	2.1902	1.71567	1.95293	14.646
CATMA1a53780	AT1G64490	AT1G64490.1	expressed protein	2.02916	1.59838	1.81377	14.6331
CATMA5a19590	AT5G21060	AT5G21060.1	homoserine dehydrogenase family protein, similar to aspartokinase-homoserine dehydrogenase (Glycine max) GI:2970447, GI:2970556; contains Pfam profile PF00742: Homoserine dehydrogenase	2.38923	2.02202	2.20563	14.5698
CATMA1a08620	AT1G09780	AT1G09780.1	2,3-biphosphoglycerate-independent phosphoglycerate mutase, putative / phosphoglyceromutase, putative, strong similarity to SP|Q42908 2,3-bisphosphoglycerate-independent phosphoglycerate mutase (EC 5.4.2.1) (Phosphoglyceromutase) {Mesembryanthemum cr	2.38539	1.71686	2.05113	14.4011
CATMA4a13955	AT4G13770	AT4G13770.1	cytochrome P450 family protein	3.81386	1.64786	2.73086	14.07
CATMA5a07500	AT5G08240	AT5G08240.1	expressed protein	2.32574	1.07305	1.6994	14.0643
CATMA2a02030	AT2G03120	AT2G03120.1	signal peptide peptidase family protein, contains Pfam domain PF04258: Membrane protein of unknown function (DUF435)	2.60318	2.09132	2.34725	14.0004
CATMA3a41910	AT3G48930	AT3G48930.1	40S ribosomal protein S11 (RPS11A)	2.49727	2.06419	2.28073	13.9462
CATMA2a20200	AT2G21520	AT2G21520.1	similar to SEC14 cytosolic factor, putative / phosphoglyceride transfer protein, putative [Arabidopsis thaliana] (TAIR:At4g39170.1); similar to putative hosphatidylinositol/phophatidylcholine transfer protein [Oryza sativa (japonica cultivar-group)]	3.19869	1.37266	2.28567	13.6742
CATMA2a45720	AT2G47250	AT2G47250.1	RNA helicase, putative, similar to SP|P53131 Pre-mRNA splicing factor RNA helicase PRP43 (Helicase JA1) {Saccharomyces cerevisiae}; contains Pfam profiles PF04408: Helicase associated domain (HA2), PF00271: Helicase conserved C-terminal domain	2.81874	2.21905	2.51889	13.5968
CATMA2a42540	AT2G44120	AT2G44120.1	60S ribosomal protein L7 (RPL7C)	2.45244	1.80937	2.1309	13.5502
CATMA1a33330	AT1G35190	AT1G35190.1	oxidoreductase, 2OG-Fe(II) oxygenase family protein, low similarity to hyoscyamine 6-dioxygenase hydroxylase from Hyoscyamus niger (GB:P24397)(SP|P24397), Atropa belladona (gi:4996123); contains Pfam domain PF03171, 2OG-Fe(II) oxygenase superfamily	2.1678	1.40138	1.78459	13.3034
CATMA1a14930	AT1G15880	AT1G15880.1	Golgi SNARE 11 protein, identical to Golgi SNARE 11 protein (GI:13898893) {Arabidopsis thaliana}; similar to putative cis-Golgi SNARE protein GI:2583133 from (Arabidopsis thaliana);similar toSP|O95249| 28 kDa Golgi SNARE protein (28 kDa cis-Golgi SNA	2.02794	1.45763	1.74279	13.234
CATMA2a24900	AT2G26590	AT2G26590.1	adhesion regulating molecule family, similar to oocyte membrane protein (GI:6174842) (Xenopus laevis); similar to Adhesion regulating molecule 1 precursor (110 kDa cell membrane glycoprotein) (Gp110) (Swiss-Prot:Q16186) (Homo sapiens); contains Pfam	2.05066	2.08791	2.06928	13.18
CATMA3a25490	AT3G25710	AT3G25710.1	basic helix-loop-helix (bHLH) family protein, contains Pfam profile: PF00010 helix-loop-helix DNA-binding domain	2.01649	1.52439	1.77044	13.1365
CATMA1a25965	AT1G27730	AT1G27730.1	Salt tolerance zinc finger protein responsive to chitin oligomers.	3.58384	0.91939	2.25162	13.1298
CATMA3a22130	AT3G22200	AT3G22200.1	4-aminobutyrate aminotransferase / gamma-amino-N-butyrate transaminase / GABA transaminase / beta-alanine--oxoglutarate aminotransferase, identical to gamma-aminobutyrate transaminase subunit precursor (Arabidopsis thaliana) (EC 2.6.1.19) GI:14030435	4.69296	2.61402	3.65349	13.0807
CATMA1a01250	AT1G02280	AT1G02280.1	GTP-binding protein (TOC33), identical to atToc33 protein (GI:11557973) (Arabidopsis thaliana); Carboxyl-terminal end highly similar to GTP-binding protein SP:U43377, location of EST gb|AA394770 and gb|R30089; identical to cDNA for chloroplast atToc3	2.11163	1.46619	1.78891	12.9183
CATMA5a12230	AT5G14000	AT5G14000.1	no apical meristem (NAM) family protein, contains Pfam PF02365: No apical meristem (NAM) domain;	2.31637	1.16075	1.73856	12.7588
CATMA2a38180	AT2G39960	AT2G39960.1	microsomal signal peptidase 25 kDa subunit, putative (SPC25), identical to Probable microsomal signal peptidase 25 kDa subunit (EC 3.4.-.-) (SPase 25 kDa subunit) (SPC25) (Swiss-Prot:P58684) (Arabidopsis thaliana); contains non-consensus AT-AC splice	2.31967	1.97992	2.14979	12.6271
CATMA3b48595	AT3G55610	AT3G55610.1	delta 1-pyrroline-5-carboxylate synthetase B / P5CS B (P5CS2), identical to SP|P54888	2.28982	1.57069	1.93026	12.5688
CATMA1b46590	AT1G55490	AT1G55490.1	RuBisCO subunit binding-protein beta subunit, chloroplast / 60 kDa chaperonin beta subunit / CPN-60 beta, identical to SWISS-PROT:P21240- RuBisCO subunit binding-protein beta subunit, chloroplast precursor (60 kDa chaperonin beta subunit, CPN-60 beta	2.68853	2.38931	2.53892	12.558
CATMA1a56230	AT1G66940	AT1G66940.1	protein kinase-related	5.00909	1.14355	3.07632	12.5254
CATMA1a64750	AT1G75410	AT1G75410.1	BEL1-like homeodomain 3 protein (BLH3), identical to BEL1-like homeodomain 3 (GI:13877515) (Arabidopsis thaliana)	2.08038	1.83235	1.95637	12.3635
CATMA5a08480	AT5G09650	AT5G09650.1	inorganic pyrophosphatase family protein, similar to SP|Q15181 Inorganic pyrophosphatase (EC 3.6.1.1) (Pyrophosphate {Homo sapiens}; contains Pfam profile PF00719: inorganic pyrophosphatase	2.06807	1.32369	1.69588	12.0097
CATMA1a59790	AT1G70530	AT1G70530.1	protein kinase family protein, contains Pfam domain, PF00069: Protein kinase domain	2.07883	1.39016	1.73449	11.9734
CATMA1a38040	AT1G45170	AT1G45170.1	expressed protein, similar to expressed protein [Arabidopsis thaliana] (TAIR:At5g42960.1); similar to expressed protein [Oryza sativa (japonica cultivar-group)] (GB:XP_470465.1)	2.08147	2.02151	2.05149	11.9423
CATMA3a43540	AT3G50470	AT3G50470.1	hypersensitive response protein 3 (HR3), identical to HR3 (Arabidopsis thaliana GI:12958164; contains Pfam profile PF05659: Arabidopsis broad-spectrum mildew resistance protein RPW8	2.27436	1.56957	1.92197	11.9323
CATMA4a29330	AT4G27690	AT4G27690.1	vacuolar protein sorting-associated protein 26, putative / VPS26, putative, similar to vacuolar sorting protein 26 (Homo sapiens) GI:9622852; contains Pfam profile PF03643: Vacuolar protein sorting-associated protein 26	2.04917	1.41918	1.73417	11.8563
CATMA4a37060	AT4G35360	AT4G35360.1	pantothenate kinase family protein, contains Pfam domain, PF01937: Protein of unknown function; similar to SP|Q9NVE7 Pantothenate kinase 4 (EC 2.7.1.33) (Pantothenic acid kinase 4) (hPanK4) {Homo sapiens}	2.36615	1.58068	1.97341	11.8489
CATMA3a17820	AT3G18280	AT3G18280.1	protease inhibitor/seed storage/lipid transfer protein (LTP) family protein, similar to TED4 (Zinnia elegans) GI:493721; contains Pfam protease inhibitor/seed storage/LTP family domain PF00234	2.25969	1.31154	1.78562	11.8478
CATMA1a08413	AT1G09560	AT1G09560.1	germin-like protein (GLP4) (GLP5), identical to Arabidopsis germin-like protein subfamily 2 member 1 (SP|P94014); Location of EST 180L10T7, gi|906417	2.01984	1.1982	1.60902	11.8131
CATMA5a37200	AT5G41600	AT5G41600.1	reticulon family protein (RTNLB4), weak similarity to Nogo-C protein (Rattus norvegicus) GI:6822251, SP|O95197 Reticulon protein 3 (Neuroendocrine-specific protein-like) {Homo sapiens}; contains Pfam profile PF02453: Reticulon	2.30367	1.93271	2.11819	11.8045
CATMA3a44380	AT3G51370	AT3G51370.1	protein phosphatase 2C, putative / PP2C, putative, similar to Ser/Thr protein phosphatase 2C (PP2C6) (GI:15020818) (Arabidopsis thaliana); similar to protein phosphatase 2C (GI:3608412) (Mesembryanthemum crystallinum); contains Pfam PF00481 : Protein	2.07493	1.56881	1.82187	11.7832
CATMA3a08550	AT3G09690	AT3G09690.1	hydrolase, alpha/beta fold family protein, contains Pfam profile PF00561: hydrolase, alpha/beta fold family	2.63652	1.83787	2.2372	11.7772
CATMA5a37720	AT5G42000	AT5G42000.1	ORMDL family protein, contains Pfam domain PF04061: ORMDL family	2.27142	1.14935	1.71038	11.754
CATMA1a04035	AT1G05180	AT1G05180.1	auxin-resistance protein AXR1 (AXR1), identical to SP|P42744 Auxin-resistance protein AXR1 {Arabidopsis thaliana}; contains Pfam profile PF00899: ThiF family; identical to cDNA ubiquitin activating enzyme E1-related protein (AXR1) GI:304103	2.23763	1.75921	1.99842	11.7407
CATMA1a08700	AT1G09850	AT1G09850.1	cysteine protease, papain-like (XBCP3), identical to papain-like cysteine peptidase XBCP3 GI:14600257 from (Arabidopsis thaliana); contains Pfam profiles PF00112: Papain family cysteine protease and PF00396: Granulin	2.56319	2.33924	2.45122	11.7163
CATMA5a60250	AT5G64813	AT5G64813.1	GTP-binding protein-related, contains weak similarity to Ras-related protein Rab-27A (Rab-27) (GTP-binding protein Ram) (Swiss-Prot:P51159) (Homo sapiens)	2.7212	1.31181	2.0165	11.6532
CATMA4a31110	AT4G29480	AT4G29480.1	mitochondrial ATP synthase g subunit family protein, contains Pfam profile: PF04718 mitochondrial ATP synthase g subunit	3.32445	1.71639	2.52042	11.6285
CATMA4a09570	AT4G09560	AT4G09560.1	protease-associated zinc finger (C3HC4-type RING finger) family protein, contains Pfam domain, PF02225: protease-associated (PA) domain and Pfam domain, PF00097: Zinc finger, C3HC4 type (RING finger); similar to ReMembR-H2 protein JR702 (Arabidopsis	2.67389	2.70346	2.68867	11.6211
CATMA5a07750	AT5G08430	AT5G08430.1	SWIB complex BAF60b domain-containing protein / plus-3 domain-containing protein / GYF domain-containing protein, similar to CPRF interacting protein (Petroselinum crispum) GI:9588690; contains Pfam profiles PF02201: BAF60b domain of the SWIB complex	2.07028	1.71642	1.89335	11.6092
CATMA3a03820	AT3G04810	AT3G04810.1	protein kinase, putative, similar to LSTK-1-like kinase (Lycopersicon esculentum) GI:15637110; contains Pfam profile: PF00069 Eukaryotic protein kinase domain	2.2013	0.849555	1.52543	11.6016
CATMA3a10850	AT3G11930	AT3G11930.1	universal stress protein (USP) family protein, similar to ER6 protein GB:AAD46412 GI:5669654 from (Lycopersicon esculentum); contains Pfam profile PF00582: universal stress protein family	2.06184	1.11992	1.59088	11.5403
CATMA4a22330	AT4G20820	AT4G20820.1	FAD-binding domain-containing protein, similar to SP|P30986 reticuline oxidase precursor (Berberine-bridge-forming enzyme) (BBE) (Tetrahydroprotoberberine synthase) (Eschscholzia californica); contains PF01565 FAD binding domain	2.10427	1.1559	1.63008	11.4873
CATMA2a27205	AT2G28800	ALB3	member of Chloroplast membrane protein ALBINO3 family	2.33771	1.63307	1.98539	11.471
CATMA5a36350	AT5G40650	AT5G40650.1	succinate dehydrogenase, iron-sulphur subunit, mitochondrial (SDH2-2), nearly identical to mitochondrial succinate dehydrogenase iron-sulphur subunit (sdh2-2) (gi:12049600) from Arabidopsis thaliana	2.33371	1.87448	2.1041	11.3139
CATMA1a18380	AT1G19360	AT1G19360.1	expressed protein	3.00251	1.8322	2.41735	11.2975
CATMA5a54250	AT5G58490	AT5G58490.1	cinnamoyl-CoA reductase family, similar to cinnamoyl-CoA reductase from Pinus taeda (GI:17978649), Eucalyptus gunnii (GI:2058311)	2.65278	1.45736	2.05507	11.2502
CATMA4a19590	AT4G18510	AT4G18510.1	Clavata3 / ESR-Related-2 (CLE2), CLAVATA3/ESR-Related-2 (CLE2)	2.12827	1.50472	1.8165	11.2483
CATMA5a43540	AT5G47570	AT5G47570.1	expressed protein	3.98574	3.16289	3.57431	11.2036
CATMA3a41735	AT3G48750	AT3G48750.1	A-type cyclin-dependent kinase. Together with its specific inhibitor, the Kip-related protein, KRP2 they regulate the mitosis-to-endocycle transition during leaf development.	3.20564	3.10064	3.15314	11.1696
CATMA4a00780	AT4G00710	AT4G00710.1	protein kinase family protein, low similarity to protein kinase (Arabidopsis thaliana) GI:2852449; contains Pfam profile: PF00069 Protein kinase domain	4.17253	3.09915	3.63584	11.1326
CATMA2a29620	AT2G31380	AT2G31380.1	zinc finger (B-box type) family protein / salt tolerance-like protein (STH), contains Pfam profile PF00643: B-box zinc finger; identical to cDNA B-box zinc finger protein STH GI:12698721, SP|Q9SID1 Salt tolerance-like protein (Arabidopsis thaliana)	2.34296	2.05647	2.19971	11.0644
CATMA3a23510	AT3G23600	AT3G23600.1	dienelactone hydrolase family protein, similar to SP|Q9ZT66 Endo-1,3;1,4-beta-D-glucanase precursor (EC 3.2.1.-) {Zea mays}; contains Pfam profile: PF01738 Dienelactone hydrolase family	2.75616	1.82046	2.28831	11.0228
CATMA4a02070	AT4G01850	AT4G01850.1	S-adenosylmethionine synthetase 2 (SAM2), identical to S-adenosylmethionine synthetase 2 (Methionine adenosyltransferase 2, AdoMet synthetase 2) (Arabidopsis thaliana) SWISS-PROT:P17562	3.06775	1.88159	2.47467	11.0057
CATMA3a14835	AT3G15410	AT3G15410.1	leucine-rich repeat family protein, contains leucine rich-repeat (LRR) domains Pfam:PF00560, INTERPRO:IPR001611; contains similarity to Hcr2-5D (Lycopersicon esculentum) gi|3894393|gb|AAC78596; identical to leucine-rich repeat protein (Arabidopsis th	2.3705	1.72557	2.04804	10.9884
CATMA2a30720	AT2G32430	AT2G32430.1	galactosyltransferase family protein, contains Pfam profile: PF01762 galactosyltransferase	2.27836	2.45341	2.36589	10.9618
CATMA5a59370	AT5G63880	AT5G63880.1	SNF7 family protein, contains Pfam domain, PF03357: SNF7 family	2.22069	1.68125	1.95097	10.9486
CATMA5a08830	AT5G10070	AT5G10070.1	RNase L inhibitor protein-related, contains Pfam profiles PF04034: Domain of unknown function (DUF367), PF04068: Possible metal-binding domain in RNase L inhibitor, RLI	2.13031	1.67536	1.90283	10.9341
CATMA3a13620	AT3G14340	AT3G14340.1	expressed protein	2.82359	2.05655	2.44007	10.9243
CATMA2a16920	AT2G18250	AT2G18250.1	cytidylyltransferase domain-containing protein, similar to CoA synthase (Mus musculus) GI:21780289, bifunctional phosphopantetheine adenylyl transferase / dephospho CoA kinase (Sus scrofa) GI:20465246; contains Pfam profile PF01467: Cytidylyltransfer	2.57498	2.19335	2.38416	10.8676
CATMA5a56700	AT5G61060	AT5G61060.1	histone deacetylase family protein, similar to SP|Q9UBN7 Histone deacetylase 6 (HD6) {Homo sapiens}; contains Pfam profile PF00850: Histone deacetylase family	2.09183	1.33104	1.71144	10.7979
CATMA5a07720	AT5G08415	AT5G08415.1	lipoic acid synthase family protein, similar to lipoic acid synthase from Arabidopsis thaliana (gi:3928758), from Mus musculus (gi:14669826) Pfam profile PF04055: radical SAM domain protein	2.77695	2.07419	2.42557	10.7922
CATMA2a25170	AT2G26830	AT2G26830.1	choline/ethanolamine kinase family protein, similar to SP|Q9HBU6 Ethanolamine kinase (EC 2.7.1.82) (EKI){Homo sapiens}, GmCK3p (Glycine max) GI:1438883; contains Pfam profile PF01633: Choline/ethanolamine kinase	2.07713	2.12358	2.10035	10.7384
CATMA2a34330	AT2G36130	AT2G36130.1	peptidyl-prolyl cis-trans isomerase, putative / cyclophilin, putative / rotamase, putative, contains Pfam domain, PF00160: peptidyl-prolyl cis-trans isomerase, cyclophilin-type	2.12535	2.06823	2.09679	10.7133
CATMA4a22750	AT4G21160	AT4G21160.1	zinc finger and C2 domain protein (ZAC), identical to zinc finger and C2 domain protein GI:9957238 from (Arabidopsis thaliana)	2.46345	1.70674	2.08509	10.6079
CATMA5a08580	AT5G09770	AT5G09770.1	ribosomal protein L17 family protein, contains Pfam profile: PF01196 ribosomal protein L17	3.92949	2.09063	3.01006	10.5956
CATMA4a40570	AT4G39080	AT4G39080.1	vacuolar proton ATPase, putative, similar to Swiss-Prot:Q93050 vacuolar proton translocating ATPase 116 kDa subunit A isoform 1 (Clathrin-coated vesicle/synaptic vesicle proton pump 116 kDa subunit, Vacuolar proton pump subunit 1, Vacuolar adenosine	2.04853	1.27794	1.66324	10.5675
CATMA4a16360	AT4G15610	AT4G15610.1	integral membrane family protein, contains TIGRFAM TIGR01569 : plant integral membrane protein TIGR01569; contains Pfam PF04535 : Domain of unknown function (DUF588)	2.10477	1.57	1.83739	10.5626
CATMA5a59710	AT5G64240	AT5G64240.1	latex-abundant family protein (AMC3) / caspase family protein, contains similarity to latex-abundant protein (Hevea brasiliensis) gb:AAD13216; contains Pfam profile PF00656: ICE-like protease (caspase) p20 domain	2.10084	1.317	1.70892	10.5489
CATMA5a17870	AT5G19440	AT5G19440.1	similar to Eucalyptus gunnii alcohol dehydrogenase of unknown physiological function (GI:1143445), apple tree, PIR:T16995; NOT a cinnamyl-alcohol dehydrogenase	2.13005	1.45686	1.79345	10.5246
CATMA2a43870	AT2G45470	AT2G45470.1	fasciclin-like arabinogalactan-protein (FLA8)	2.61284	1.9335	2.27317	10.415
CATMA1a03240	AT1G04410	AT1G04410.1	malate dehydrogenase, cytosolic, putative, strong similarity to malate dehydrogenase from Mesembryanthemum crystallinum (SP|O24047), Medicago sativa (SP|O48905), Prunus persica (GI:15982948); contains InterPro entry IPR001236: Lactate/malate dehydrog	2.0542	1.45482	1.75451	10.3302
CATMA1a14190	AT1G15200	AT1G15200.1	protein-protein interaction regulator family protein, contains Pfam PF04696: pinin/SDK/memA/ protein conserved region	2.22087	1.95765	2.08926	10.3287
CATMA3a08750	AT3G09900	AT3G09900.1	Ras-related GTP-binding protein, putative, similar to GTP-binding protein GI:871510 from (Pisum sativum); contains Pfam profile: PF00071 Ras family	2.28872	1.45154	1.87013	10.2931
CATMA5a55220	AT5G59480	AT5G59480.1	haloacid dehalogenase-like hydrolase family protein, low similarity to SP|P53078 SSM1 protein {Saccharomyces cerevisiae}; contains InterPro accession IPR005834: Haloacid dehalogenase-like hydrolase	2.58278	3.54431	3.06355	10.2644
CATMA4a19420	AT4G18360	AT4G18360.1	(S)-2-hydroxy-acid oxidase, peroxisomal, putative / glycolate oxidase, putative / short chain alpha-hydroxy acid oxidase, putative, similar to (S)-2-hydroxy-acid oxidase, peroxisomal (Glycolate oxidase, GOX) (Short chain alpha-hydroxy acid oxidase) (	2.54901	1.57501	2.06201	10.2589
CATMA2a37135	AT2G38880	AT2G38880.1	histone-like transcription factor (CBF/NF-Y) family protein, similar to CAAT-box DNA binding protein subunit B (NF-YB) (SP:P25209) (GI:22380) (Zea mays) and CCAAT-binding transcription factor subunit A (CBF-A) (NF-Y protein chain B) (NF-YB) (CAAT-bo	2.71621	2.61183	2.66402	10.1401
CATMA1a61410	AT1G72180	AT1G72180.1	leucine-rich repeat transmembrane protein kinase, putative, similar to GI:3641252 from (Malus x domestica) (Plant Mol. Biol. 40 (6), 945-957 (1999))	2.77133	2.12714	2.44924	10.0947
CATMA2a42525	AT2G44100	AT2G44100.1	Rab GDP dissociation inhibitor (GDI1), identical to GDP dissociation inhibitor (Arabidopsis thaliana) GI:1655424	2.07787	1.44273	1.7603	10.0566
CATMA3a12300	AT3G13225	AT3G13225.1	similar to PREDICTED: similar to mKIAA1014 protein [Gallus gallus] (GB:XP_424260.1); contains InterPro domain WW/Rsp5/WWP domain (InterPro:IPR001202)	2.1813	1.5978	1.88955	9.99943
CATMA5a17990	AT5G19550	ASP2	Nitrogen metabolism. Major cytosolic isoenzyme controlling aspartate biosynthesis in the light.	2.62796	1.82941	2.22868	9.9926
CATMA1a59850	AT1G70580	AOAT2	Similar to glutamate-glyoxylate transaminase enzyme encoded by AOAT1	2.20324	1.482	1.84262	9.98907
CATMA2a16010	AT2G17280	AT2G17280.1	phosphoglycerate/bisphosphoglycerate mutase family protein, contains Pfam profile PF00300: phosphoglycerate mutase family	5.28372	4.82949	5.05661	9.95034
CATMA3a52330	AT3G59280	AT3G59280.1	signaling molecule-related, contains similarity to mitochondria-associated granulocyte macrophage CSF signaling molecule, mitochondrial precursor (CGI-136) (Mus musculus) SWISS-PROT:Q9CQV1	2.50662	1.71896	2.11279	9.87309
CATMA1a53680	AT1G64385	AT1G64385.1	expressed protein	2.55976	1.18746	1.87361	9.86853
CATMA1a31460	AT1G33110	AT1G33110.1	MATE efflux family protein, similar to ripening regulated protein DDTFR18 (Lycopersicon esculentum) GI:12231296; contains Pfam profile PF01554: Uncharacterized membrane protein family	2.2642	0.980084	1.62214	9.80966
CATMA3a48366	AT3G55380	AT3G55380.1	ubiquitin-conjugating enzyme 14 (UBC14), E2; UbcAT3; identical to gi:2129757, S46656	2.0028	1.67343	1.83812	9.65156
CATMA1a62920	AT1G73600	AT1G73600.1	phosphoethanolamine N-methyltransferase 3, putative (NMT3), strong similarity to SP|Q9FR44 Phosphoethanolamine N-methyltransferase 1 (EC 2.1.1.103) (PEAMT 1) (AtNMT1) {Arabidopsis thaliana}; identical to SP|Q9C6B9 Putative phosphoethanolamine N-methy	3.22649	1.90281	2.56465	9.63273
CATMA4a02090	AT4G01870	AT4G01870.1	tolB protein-related, contains weak similarity to TolB protein precursor (Swiss-Prot:P44677) (Haemophilus influenzae)	2.03683	0.908318	1.47257	9.5942
CATMA4a31020	AT4G29390	AT4G29390.1	40S ribosomal protein S30 (RPS30B), RIBOSOMAL PROTEIN S30 - Arabidopsis thaliana,PID:e1358183	2.00957	1.62003	1.8148	9.5873
CATMA3a00590	AT3G01590	AT3G01590.1	aldose 1-epimerase family protein, similar to apospory-associated protein C; APOC (Chlamydomonas reinhardtii) GI:6970044 Pfam profile PF01263: Aldose 1-epimerase	2.31584	1.65601	1.98593	9.57637
CATMA3a08735	AT3G09880	AT3G09880.1	serine/threonine protein phosphatase 2A (PP2A) regulatory subunit B' (B'beta), identical to B' regulatory subunit of PP2A (Arabidopsis thaliana) GI:2160692; similar to SWISS-PROT:Q28653 serine/threonine protein phosphatase 2A, 56 kDa regulatory subun	2.0014	1.71959	1.8605	9.46807
CATMA3a41660	AT3G48690	AT3G48690.1	expressed protein, similar to PrMC3 (Pinus radiata) GI:5487873	2.32327	1.77666	2.04997	9.4569
CATMA1a53160	AT1G63900	AT1G63900.1	zinc finger (C3HC4-type RING finger) family protein, contains Pfam profile: PF00097 zinc finger, C3HC4 type (RING finger)	2.10719	1.22913	1.66816	9.44057
CATMA4a37225	AT4G35570	AT4G35570.1	high mobility group protein delta (HMGdelta) / HMG protein delta, identical to HMG protein (HMGdelta) (Arabidopsis thaliana) GI:2832363	2.04193	1.95703	1.99948	9.40836
CATMA2a44180	AT2G45790	AT2G45790.1	eukaryotic phosphomannomutase family protein, contains Pfam profile: PF03332 eukaryotic phosphomannomutase	2.87548	1.57623	2.22585	9.38227
CATMA1a22340	AT1G23260	AT1G23260.1	ubiquitin-conjugating enzyme family protein, similar to TRAF6-regulated IKK activator 1 beta Uev1A (Homo sapiens) GI:10880969; contains Pfam profile PF00179: Ubiquitin-conjugating enzyme	3.3524	1.91609	2.63425	9.32216
CATMA5a62300	AT5G66870	ASL1	Encodes LOB domain protein whose overexpression results in KNOX gene repression. Overexpression also results in plants with hyponastic leaves, downward pointing flowers and reduced apical dominance. May be involved in the transcriptional regulation	2.2196	3.00256	2.61108	9.26897
CATMA5a59367	AT5G63870	AT5G63870.1	serine/threonine protein phosphatase (PP7), identical to PP7 (Arabidopsis thaliana) GI:2791900	2.47257	1.70252	2.08754	9.24746
CATMA1a32220	AT1G33990	AT1G33990.1	hydrolase, alpha/beta fold family protein, similar to polyneuridine aldehyde esterase GI:6651393 from (Rauvolfia serpentina), SP|Q40708 PIR7A protein {Oryza sativa}, ethylene-induced esterase (Citrus sinensis) GI:14279437; contains Pfam profile PF005	2.07811	2.34868	2.2134	9.23121
CATMA4a02790	AT4G02480	AT4G02480.1	AAA-type ATPase family protein, contains Pfam domain, PF00004: ATPase, AAA family; similar to Spastin (Swiss-Prot:Q9UBP0) (Homo sapiens) and Spastin (Fragment) (Swiss-Prot:Q9QYY8) (Mus musculus); similar to mitochondrial sorting protein 1 (MSP1) prot	2.26367	1.26848	1.76608	9.19311
CATMA5a59030	AT5G63510	AT5G63510.1	bacterial transferase hexapeptide repeat-containing protein, contains similarity to acetyltransferase; contains Pfam profile PF00132: Bacterial transferase hexapeptide (four repeats)	2.01634	1.29502	1.65568	9.17777
CATMA1a30560	AT1G32210	AT1G32210.1	defender against cell death 1 (DAD1), identical to defender against cell death 1 (DAD-1, AtDAD1) (Arabidopsis thaliana) SWISS-PROT:Q39080	2.10046	1.50267	1.80157	9.09747
CATMA1a59570	AT1G70290	AT1G70290.1	trehalose-6-phosphate synthase, putative, similar to Alpha,alpha-trehalose-phosphate synthase (UDP-forming) (EC 2.4.1.15) (Trehalose-6-phosphate synthase) from {Kluyveromyces lactis} SP|Q07158, {Saccharomyces cerevisiae} SP|Q00764; contains Pfam prof	4.5963	2.18897	3.39263	9.09085
CATMA5a49530	AT5G53650	AT5G53650.1	expressed protein	2.31433	1.79459	2.05446	9.0897
CATMA5a17950	AT5G19500	AT5G19500.1	tryptophan/tyrosine permease family protein, contains Pfam profile PF03222: Tryptophan/tyrosine permease family	2.2227	1.5988	1.91075	9.01409
CATMA4a13900	AT4G13720	AT4G13720.1	inosine triphosphate pyrophosphatase, putative / HAM1 family protein, contains Pfam profile PF01725: Ham1 family; similar to inosine triphosphate pyrophosphatase (GI:13398328) (Homo sapiens)	2.76846	1.36298	2.06572	9.01073
CATMA1a00320	AT1G01340	AT1G01340.1	cyclic nucleotide-regulated ion channel (CNGC10) (ACBK1), almost identical to CaM-regulated potassium ion channel (ACBK1) GI:8515883 from (Arabidopsis thaliana); contains Pfam domain, PF00520: Ion transport protein	2.05893	1.76274	1.91083	8.95242
CATMA1a02980	AT1G04120	AT1G04120.1	ABC transporter family protein, Strong similarity to MRP-like ABC transporter gb|U92650 from A. thaliana and canalicular multi-drug resistance protein gb|L49379 from Rattus norvegicus	2.65836	1.79462	2.22649	8.9238
CATMA4a15410	AT4G14950	AT4G14950.1	expressed protein	2.39974	2.20052	2.30013	8.80342
CATMA1a30390	AT1G32050	AT1G32050.1	secretory carrier membrane protein (SCAMP) family protein, contains Pfam domain, PF04144: SCAMP family	2.33836	2.24857	2.29347	8.79432
CATMA1a40590	AT1G49480	AT1G49480.1	transcriptional factor B3 family protein, contains Pfam profile PF02362: B3 DNA binding domain	2.03541	1.60966	1.82253	8.75589
CATMA2a46160	AT2G47730	AT2G47730.1	glutathione S-transferase 6 (GST6), identical to GB:X95295. Based on identical cDNA hits, the translation is now 40 AAs longer at the N-terminal, and start of exon2 is also corrected.	3.1072	1.68185	2.39453	8.69886
CATMA5a59690	AT5G64220	AT5G64220.1	calmodulin-binding protein, similar to anther ethylene-upregulated calmodulin-binding protein ER1 GI:11612392 from(Nicotiana tabacum)	2.07589	1.46403	1.76996	8.67916
CATMA5a61840	AT5G66490	AT5G66490.1	expressed protein	2.43754	1.42264	1.93009	8.49833
CATMA5a54840	AT5G59090	AT5G59090.1	subtilase family protein, contains similarity to prepro-cucumisin GI:807698 from (Cucumis melo)	2.28506	1.21592	1.75049	8.49796
CATMA2a42030	AT2G43610	AT2G43610.1	glycoside hydrolase family 19 protein, similar to chitinase GI:17799 from (Brassica napus); contains Pfam profiles PF00182: Chitinase class I, PF00187: Chitin recognition protein	2.29996	1.60633	1.95314	8.38508
CATMA4a12730	AT4G12570	AT4G12570.1	ubiquitin-protein ligase, putative, similar to SP|P39940 Ubiquitin--protein ligase RSP5 (EC 6.3.2.-) {Saccharomyces cerevisiae}; contains Pfam profiles PF00240: Ubiquitin family, PF00632: HECT-domain (ubiquitin-transferase)	2.62598	1.66638	2.14618	8.3562
CATMA3a14410	AT3G15060	AT3G15060.1	Ras-related GTP-binding family protein, similar to GTP-binding protein GI:303742 from (Pisum sativum); contains Pfam profile: PF00071 ras family	2.34849	1.2513	1.7999	8.11253
CATMA5a26910	AT5G28830	AT5G28830.1	calcium-binding EF hand family protein, contains INTERPRO:IPR002048 calcium-binding EF-hand domain	2.05865	1.50644	1.78254	8.09602
CATMA4a31880	AT4G30260	AT4G30260.1	integral membrane Yip1 family protein, contains Pfam domain, PF04893: Yip1 domain	2.13541	1.41177	1.77359	8.08681
CATMA1a01765	AT1G02840	AT1G02840.1	pre-mRNA splicing factor SF2 (SF2) / SR1 protein, identical to SP|O22315 Pre-mRNA splicing factor SF2 (SR1 protein) {Arabidopsis thaliana}	2.10943	2.0514	2.08041	8.01214
CATMA1a66220	AT1G76980	AT1G76980.1	expressed protein	2.13624	1.48942	1.81283	8.00143
CATMA2a42600	AT2G44180	AT2G44180.1	methionyl aminopeptidase, putative / methionine aminopeptidase, putative / peptidase M, putative, similar to SP|P50579 Methionine aminopeptidase 2 (EC 3.4.11.18) (MetAP 2) {Homo sapiens}; contains Pfam profile PF00557: metallopeptidase family M24	2.038	1.36376	1.70088	7.82641
CATMA5a21225	AT5G23740	AT5G23740.1	40S ribosomal protein S11 (RPS11C)	3.54542	2.92186	3.23364	7.77503
CATMA5a19500	AT5G20950	AT5G20950.1	glycosyl hydrolase family 3 protein, beta-D-glucan exohydrolase, Nicotiana tabacum, EMBL:AB017502	2.19857	1.32919	1.76388	7.75073
CATMA3b41885	AT3G48890	AT3G48890.1	cytochrome b5 domain-containing protein, similar to SP|O00264 Membrane associated progesterone receptor component (mPR) {Homo sapiens}; contains Pfam profile PF00173: Heme/Steroid binding domain	2.14212	1.95826	2.05019	7.67476
CATMA2b15865	AT2G17120	AT2G17120.1	peptidoglycan-binding LysM domain-containing protein, contains Pfam profile PF01476: LysM domain; supporting cDNA gi|16226688|gb|AF428464.1|AF428464	2.56406	2.03006	2.29706	7.61258
CATMA1a38150	AT1G47250	AT1G47250.1	20S proteasome alpha subunit F2 (PAF2) (PRC2B) (PRS1), identical to GB:AAC32063 from (Arabidopsis thaliana) (Genetics 149 (2), 677-692 (1998)); identical to cDNA proteasome subunit prc2b GI:2511585	2.476	1.42172	1.94886	7.60152
CATMA1a06860	AT1G07830	AT1G07830.1	ribosomal protein L29 family protein, similar to GB:CAA83057 from (Saccharomyces cerevisiae)	2.62683	2.23872	2.43278	7.46467
CATMA4a36820	AT4G35080	AT4G35080.1	high-affinity nickel-transport family protein, contains Pfam domain, PF03824: High-affinity nickel-transport protein	2.31921	1.56708	1.94315	7.41575
CATMA5a39420	AT5G43600	AT5G43600.1	N-carbamyl-L-amino acid hydrolase, putative, similar to N-carbamoyl-L-amino acid hydrolase (Bacillus stearothermophilus) SWISS-PROT:Q53389	2.68229	2.30615	2.49422	7.41227
CATMA5a54140	AT5G58380	AT5G58380.1	CBL-interacting protein kinase 10 (CIPK10), identical to CBL-interacting protein kinase 10 (Arabidopsis thaliana) gi|13249119|gb|AAK16685; contains Pfam profiles PF00069: Protein kinase domain and PF03822: NAF domain; identical to cDNA CBL-interactin	2.00395	1.83726	1.9206	7.28971
CATMA5a07920	AT5G08570	AT5G08570.1	pyruvate kinase, putative, similar to pyruvate kinase, cytosolic isozyme (Glycine max) SWISS-PROT:Q42806	2.16674	1.39192	1.77933	7.20539
CATMA1a62970	AT1G73650	AT1G73650.1	expressed protein	2.09303	1.45273	1.77288	7.04337
CATMA5a43640	AT5G47660	AT5G47660.1	DNA-binding protein-related, similar to GTL1 (Arabidopsis thaliana) GI:2664198	3.17404	2.3243	2.74917	6.6538
CATMA1a37740	AT1G44760	AT1G44760.1	universal stress protein (USP) family protein, contains Pfam profile PF00582: universal stress protein family	2.11243	1.63189	1.87216	6.58931
CATMA1a37985	AT1G45130	AT1G45130.1	beta-galactosidase, putative / lactase, putative, similar to beta-galactosidase (Lycopersicon esculentum) GI:7939619, beta-galactosidase BG1 GI:15081596 from (Vitis vinifera); contains Pfam profile PF01301: Glycosyl hydrolases family 35	2.02172	1.34667	1.6842	6.41374
CATMA4a31790	AT4G30140	AT4G30140.1	GDSL-motif lipase/hydrolase family protein, low similarity to family II lipases EXL3 GI:15054386, EXL1 GI:15054382 from (Arabidopsis thaliana); contains Pfam profile PF00657: GDSL-like Lipase/Acylhydrolase	2.23587	1.05383	1.64485	6.36812
CATMA1a08650	AT1G09810	AT1G09810.1	expressed protein, contains Pfam profile PF04146: YT521-B-like family	2.6023	2.21946	2.41088	6.2066
CATMA1a18916	AT1G19920	APS2	encodes a chloroplast form of ATP sulfurylase	2.11101	1.79781	1.95441	6.20052
CATMA4a08060	AT4G08310	AT4G08310.1	expressed protein, glutamic acid-rich protein precursor - Plasmodium falciparum, PIR2:A54514	2.16302	1.89054	2.02678	6.19888
CATMA3a42590	NA	CATMA3a42590	NA	2.06882	1.31583	1.69233	6.0882
CATMA3a19050	AT3G19460	AT3G19460.1	reticulon family protein (RTNLB11), weak similarity to neuroendocrine-specific protein C (Homo sapiens) GI:307311; identical to cDNA RTNLB11 GI:32331878	2.16735	2.37504	2.27119	5.82827
CATMA1a12560	AT1G13570	AT1G13570.1	F-box family protein, contains F-box domain Pfam:PF00646 ; similar to SKP1 interacting partner 2 (SKIP2) TIGR_Ath1:At5g67250	2.12872	1.74094	1.93483	5.78292
CATMA1a63730	NA	CATMA1a63730	NA	2.13193	1.44768	1.7898	5.6806
CATMA1a63050	AT1G73720	AT1G73720.1	transducin family protein / WD-40 repeat family protein, contains 5 WD-40 repeats (PF00400); similar to Will die slowly protein (SP:Q9V3J8)(Drosophila melanogaster)	2.15598	1.53024	1.84311	5.48996
CATMA3a27115	AT3G27300	AT3G27300.1	glucose-6-phosphate 1-dehydrogenase / G6PD (ACG9), identical to glucose-6-phosphate 1-dehydrogenase (acg9) (Arabidopsis thaliana) GI:5732195	2.2382	1.98343	2.11082	5.39908
CATMA1b52130	AT1G62970	AT1G62970.1	DNAJ heat shock N-terminal domain-containing protein, low similarity to AHM1 (Triticum aestivum) GI:6691467; contains Pfam profile PF00226: DnaJ domain	2.12749	2.83317	2.48033	5.28541
CATMA1a30840	AT1G32440	AT1G32440.1	pyruvate kinase, putative, similar to pyruvate kinase isozyme G, chloroplast precursor (Nicotiana tabacum) SWISS-PROT:Q40546	2.21435	1.58925	1.9018	5.22246
CATMA5a55280	AT5G59540	AT5G59540.1	oxidoreductase, 2OG-Fe(II) oxygenase family protein, similar to desacetoxyvindoline-4-hydroxylase (Catharanthus roseus) GI:2352812; contains Pfam profile PF03171: oxidoreductase, 2OG-Fe(II) oxygenase family	2.06125	0.967832	1.51454	5.1414
CATMA2a00320	AT2G01260	AT2G01260.1	expressed protein	2.4251	1.86575	2.14543	5.0965
CATMA1a58340	AT1G68940	AT1G68940.1	armadillo/beta-catenin repeat protein-related / U-box domain-containing protein, ; contains Pfam profile PF04564: U-box domain	2.52425	2.88093	2.70259	4.91007
CATMA3a44640	AT3G51660	AT3G51660.1	macrophage migration inhibitory factor family protein / MIF family protein, contains Pfam profile: PF01187 Macrophage migration inhibitory factor family(MIF)	2.27146	1.54214	1.9068	4.87861
CATMA1a63360	AT1G74010	AT1G74010.1	strictosidine synthase family protein, similar to strictosidine synthase (Rauvolfia serpentina)(SP|P15324); contains strictosidine synthase domain PF03088	2.08249	2.08047	2.08148	4.63086
CATMA3a37240	AT3G44330	AT3G44330.1	expressed protein	2.07232	1.08149	1.5769	4.61603
CATMA4a02465	AT4G02195	AT4G02195.1	syntaxin 42 (SYP42) / TLG2b, identical to SP|Q9SWH4 Syntaxin 42 (AtSYP42) (AtTLG2b) {Arabidopsis thaliana}	2.97153	3.14343	3.05748	4.5959
CATMA2a36435	AT2G38140	AT2G38140.1	chloroplast 30S ribosomal protein S31 (PSRP4)	2.50119	1.35847	1.92983	4.32621
CATMA5a08130	AT5G09320	AT5G09320.1	vacuolar sorting protein 9 domain-containing protein / VPS9 domain-containing protein, contains similarity to Rab5 GDP/GTP exchange factor, Rabex5 (Bos taurus) gi|2558516|emb|CAA04545; contains Pfam profile PF02204: Vacuolar sorting protein 9 (VPS9)	3.06985	1.35116	2.2105	4.14318
CATMA3a29590	AT3G29390	AT3G29390.1	hydroxyproline-rich glycoprotein family protein, sequencing discrepancy between cDNA and genomic sequence prevents representation of entire coding sequence	2.11353	2.10594	2.10974	4.13497
CATMA5a59910	AT5G64480	AT5G64480.1	expressed protein	2.57777	2.91395	2.74586	3.92291
CATMA1a57830	AT1G68450	AT1G68450.1	VQ motif-containing protein, contains PF05678: VQ motif	3.71423	4.04609	3.88016	3.88371
CATMA5a39670	AT5G43830	AT5G43830.1	expressed protein, similar to auxin down-regulated protein ARG10 (Vigna radiata) GI:2970051, wali7 (aluminum-induced protein) (Triticum aestivum) GI:451193	2.39168	1.89039	2.14103	3.56642

## Sheet: (B) BA15 down
CATMA ID	AGI	genename	description	Mean Ratio BA15 vs. BA0	Mean Ratio BA120 vs. BA0	Mean Ratio BAx vs. BA0	Meta Statistics
CATMA1a30420	AT1G32080	AT1G32080.1	membrane protein, putative, contains 12 transmembrane domains; similar to yohK (GI:405873) (Escherichia coli)	0.478156	0.52867	0.503413	25.4374
CATMA2a02430	AT2G03505	AT2G03505.1	glycosyl hydrolase family protein 17, similar to Glucan endo-1,3-beta-glucosidase precursor (EC 3.2.1.39) ((1-3)-beta- glucan endohydrolase) ((1-3)-beta-glucanase) (Beta-1,3- endoglucanase) (Swiss-Prot:P52409) (Triticum aestivum); similar to beta 1,3	0.446603	0.525262	0.485933	19.8003
CATMA3a04740	AT3G05680	AT3G05680.1	expressed protein	0.436434	1.37822	0.907326	18.4408
CATMA2a02600	AT2G03720	AT2G03720.1	universal stress protein (USP) family protein, contains Pfam profile PF00582: universal stress protein family	0.402551	0.734797	0.568674	13.2143
CATMA3a52690	AT3G59660	AT3G59660.1	C2 domain-containing protein / GRAM domain-containing protein, low similarity to GLUT4 vesicle protein (Rattus norvegicus) GI:4193489; contains Pfam profiles PF00168: C2 domain, PF02893: GRAM domain	0.461962	0.704564	0.583263	11.4966
CATMA2a45820	AT2G47360	AT2G47360.1	expressed protein	0.346401	0.727361	0.536881	9.15257
CATMA5a54690	NA	CATMA5a54690	NA	0.424077	0.830865	0.627471	6.02857

## Sheet: (C) BA120 up
CATMA ID	AGI	genename	description	Mean Ratio BA15 vs. BA0	Mean Ratio BA120 vs. BA0	Mean Ratio BAx vs. BA0	Meta Statistics
CATMA5a58475	AT5G62920	ARR6	Encodes a Type-A response regulator that is responsive to cytokinin treatment. Its C-ter domain is very short in comparison to other Arabidopsis ARRs (17 total).	4.82586	3.08467	3.95527	129.822
CATMA5a05050	AT5G05860	AT5G05860.1	UDP-glucoronosyl/UDP-glucosyl transferase family protein, contains Pfam profile: PF00201 UDP-glucoronosyl and UDP-glucosyl transferase	1.34396	2.87006	2.10701	117.448
CATMA1a09322	AT1G10470	ARR4	ARR4 mRNA for response regulator 4 and response regulator 1, complete cds, two-component response regulator homolog (IBC7)	1.18079	2.33675	1.75877	101.378
CATMA3a37230	AT3G44326	CATMA3a37230	similar to F-box family protein [Arabidopsis thaliana] (TAIR:AT2G27310.1); similar to F-box protein-like [Oryza sativa (japonica cultivar-group)] (GB:BAD27806.1); contains InterPro domain Cyclin-like F-box; (InterPro:IPR001810)	2.44325	2.42383	2.43354	94.1119
CATMA3a29390	AT3G29250	AT3G29250.1	short-chain dehydrogenase/reductase (SDR) family protein, similar to 3-beta-hydroxysteroiddehydrogenase GI:15983819 from (Digitalis lanata); contains Pfam profile: PF00106 short chain dehydrogenase	1.25546	3.9032	2.57933	92.9755
CATMA4a31370	AT4G29740	AT4G29740.1	FAD-binding domain-containing protein / cytokinin oxidase family protein, similar to cytokinin oxidase, Zea mays (gi:3882018) (gi:3441978)	7.59679	6.29332	6.94505	86.4106
CATMA5a47710	AT5G51780	AT5G51780.1	basix helix-loop-helix (bHLH) family protein, contains Pfam profile: PF00010 helix-loop-helix DNA-binding domain	1.26355	2.3541	1.80882	85.694
CATMA1a18090	AT1G19050	ARR7	ARR7 mRNA for response regulator 7, complete cds	11.7229	8.94027	10.3316	85.0874
CATMA5a43950	AT5G47980	AT5G47980.1	transferase family protein, similar to alcohol acyltransferase (Fragaria x ananassa)(GI:10121328)(PMID:10810141), deacetylvindoline 4-O-acetyltransferase (Catharanthus roseus)(GI:4091808)(PMID:9681034)	2.00401	12.2898	7.1469	80.1774
CATMA5a43970	AT5G48000	AT5G48000.1	cytochrome P450 family protein, similar to steroid 22-alpha-hydroxylase; DWF4; CYP90B1 (GI:2935342) (Arabidopsis thaliana)	0.788227	3.96742	2.37782	77.8165
CATMA1a57750	AT1G68360	AT1G68360.1	zinc finger protein-related, similar to zinc finger protein GI:790683 from (Arabidopsis thaliana)	3.01727	2.51279	2.76503	77.0101
CATMA5a17520	AT5G19110	AT5G19110.1	extracellular dermal glycoprotein-related / EDGP-related, similar to extracellular dermal glycoprotein EDGP precursor (Daucus carota) GI:285741	2.00714	4.48321	3.24518	76.8899
CATMA3a50000	AT3G57010	AT3G57010.1	strictosidine synthase family protein, similar to strictosidine synthase (Rauvolfia serpentina)(SP|P15324)	1.38371	4.40147	2.89259	75.8794
CATMA2a38980	AT2G40670	ARR16	response regulator 16	2.39088	7.51023	4.95055	75.3572
CATMA1a12420	AT1G13420	AT1G13420.1	sulfotransferase family protein, similar to steroid sulfotransferase 1 GI:3420004 from (Brassica napus); contains Pfam profile PF00685: Sulfotransferase domain	1.08487	6.73854	3.9117	71.3061
CATMA3a15410	AT3G15990	AT3G15990.1	sulfate transporter, putative, similar to sulfate transporter (Arabidopsis thaliana) GI:2285885; contains Pfam profiles PF00916: Sulfate transporter family, PF01740: STAS domain	1.91291	6.73393	4.32342	69.9154
CATMA1a67645	AT1G78570	AT1G78570.1	NAD-dependent epimerase/dehydratase family protein, similar to dTDP-glucose 4,6-dehydratase from Aneurinibacillus thermoaerophilus GI:16357461, RmlB from Leptospira borgpetersenii GI:4234803; contains Pfam profile PF01370 NAD dependent epimerase/dehy	1.39948	2.5366	1.96804	69.911
CATMA4a31320	AT4G29690	AT4G29690.1	type I phosphodiesterase/nucleotide pyrophosphatase family protein, similar to SP|P22413 Ectonucleotide pyrophosphatase/phosphodiesterase 1 (Plasma-cell membrane glycoprotein PC-1) (Includes: Alkaline phosphodiesterase I (EC 3.1.4.1); Nucleotide pyro	2.09631	6.76105	4.42868	67.1612
CATMA4a25570	AT4G23750	AT4G23750.1	encodes a member of the ERF (ethylene response factor) subfamily B-5 of ERF/AP2 transcription factor family. The protein contains one AP2 domain. There are 7 members in this subfamily.	2.00851	2.58176	2.29513	64.7217
CATMA5a56580	AT5G60890	AT5G60890.1	receptor-like protein kinase (ATR1) (MYB34), identical to receptor-like protein kinase(ATR1) GI:3150037 from (Arabidopsis thaliana); contains PFAM profile: myb DNA binding domain PF00249; identical to cDNA putative transcription factor (MYB34) mRNA,	1.82814	3.24196	2.53505	63.6363
CATMA3a29720	AT3G29575	AT3G29575.1	expressed protein	1.39844	2.30593	1.85219	63.4082
CATMA2a27835	AT2G29450	AT2G29450.1	glutathione S-transferase (103-1A), identical to Swiss-Prot:P46421 glutathione S-transferase 103-1A (Arabidopsis thaliana)	1.27635	5.15561	3.21598	63.2701
CATMA1a46055	AT1G55020	AT1G55020.1	lipoxygenase (LOX1), identical to SP|Q06327	1.07323	2.23034	1.65179	61.5997
CATMA5a38360	AT5G42590	AT5G42590.1	cytochrome P450 71A16, putative (CYP71A16), Identical to Cytochrome P450 71A16 (SP:Q9FH66) (Arabidopsis thaliana)	0.727786	3.89738	2.31258	60.6408
CATMA4a38980	AT4G37410	AT4G37410.1	cytochrome P450, putative, similar to cytochrome p450 SP:O65790 from (Arabidopsis thaliana)	2.6329	7.58404	5.10847	56.6227
CATMA1a37950	AT1G45015	AT1G45015.1	MD-2-related lipid recognition domain-containing protein / ML domain-containing protein, contains Pfam profile PF02221: ML domain	1.01815	2.08901	1.55358	56.4949
CATMA3a15360	AT3G15950	AT3G15950.1	Similar to TSK-associating protein 1 (TSA1), contains 10 EFE repeats, a novel repeat sequence unique to plants. Expressed preferentially in the roots.	1.17515	2.28129	1.72822	56.0339
CATMA5a22640	AT5G24920	AT5G24920.1	expressed protein, ; expression supported by MPSS	1.67295	2.33172	2.00234	54.5356
CATMA1a29860	AT1G31660	AT1G31660.1	bystin family, contains Pfam profile: PF05291 Bystin	1.33978	2.43049	1.88513	52.2064
CATMA4a31330	AT4G29700	AT4G29700.1	type I phosphodiesterase/nucleotide pyrophosphatase family protein, similar to SP|P22413 Ectonucleotide pyrophosphatase/phosphodiesterase 1 (Plasma-cell membrane glycoprotein PC-1) (Includes: Alkaline phosphodiesterase I (EC 3.1.4.1); Nucleotide pyro	2.26456	4.56368	3.41412	50.8423
CATMA1a61370	AT1G72140	AT1G72140.1	proton-dependent oligopeptide transport (POT) family protein, contains Pfam profile: PF00854 POT family	1.33902	3.08619	2.2126	50.4748
CATMA3a29930	AT3G29670	AT3G29670.1	transferase family protein, similar to anthocyanin 5-aromatic acyltransferase from Gentiana triflora GI:4185599, malonyl CoA:anthocyanin 5-O-glucoside-6'''-O-malonyltransferase from Perilla frutescens GI:17980232, Salvia splendens GI:17980234; contai	1.46895	3.76534	2.61715	50.0185
CATMA3a47640	AT3G54720	AMP1	Encodes glutamate carboxypeptidase. Various alleles show-increased cotyledon number and rate of leaf initiation, show transformation of leaves to cotyledons, altered flowering time and photomorphogenesis and an increased level of cytokinin biosynthes	1.01073	2.15812	1.58442	49.5141
CATMA3a22775	AT3G22840	AT3G22840.1	chlorophyll A-B binding family protein / early light-induced protein (ELIP), identical to early light-induced protein; ELIP (Arabidopsis thaliana) GI:1872544; contains Pfam profile: PF00504 chlorophyll A-B binding protein; identical to cDNA early lig	1.08266	3.00894	2.0458	49.0282
CATMA1a58850	AT1G69530	AT1G69530.1	expansin, putative (EXP1), identical to expansin (At-EXP1) (Arabidopsis thaliana) GI:1041702; alpha-expansin gene family, PMID:11641069	1.4778	2.32843	1.90311	47.2609
CATMA5a36060	AT5G40390	AT5G40390.1	raffinose synthase family protein, similar to galactinol-raffinose galactosyltransferase (Vigna angularis) GI:6634701, seed imbibition protein GB:AAA32975 GI:167100 from (Hordeum vulgare); contains Pfam profile PF05691: Raffinose synthase or seed imb	1.58028	2.61939	2.09983	47.1338
CATMA3a29510	AT3G29330	AT3G29330.1	expressed protein	0.941538	2.34994	1.64574	46.6827
CATMA3a18210	AT3G18600	AT3G18600.1	DEAD/DEAH box helicase, putative, non-consensus acceptor splice site AT at exon 2; similar to DEAD box helicase protein GB:NP_006764 from (Homo sapiens), contains Pfam profile: PF00270 DEAD/DEAH box helicase	1.201	2.02487	1.61294	46.272
CATMA2a42060	AT2G43650	AT2G43650.1	Sas10/U3 ribonucleoprotein (Utp) family protein, contains Pfam profile PF04000: Sas10/Utp3 family; contains Prosite PS00761: Signal peptidases I signature 3; weak similarity to PEBP2 beta-binding protein / charged amino acid rich leucine zipper facto	1.56339	2.44957	2.00648	46.0873
CATMA1a68390	AT1G79270	AT1G79270.1	expressed protein, contains Pfam profile PF04146: YT521-B-like family	1.16759	2.38213	1.77486	45.8739
CATMA5a43920	AT5G47950	AT5G47950.1	transferase family protein, similar to deacetylvindoline 4-O-acetyltransferase (Catharanthus roseus)(GI:4091808)(PMID:9681034), acetyl-CoA:benzylalcohol acetyltranferase (Clarkia concinna)(GI:6166328)(PMID:10588064)	1.17076	2.2918	1.73128	45.3617
CATMA4a36430	AT4G34590	AT4G34590.1	bZIP transcription factor family protein, similar to common plant regulatory factor 7 GI:9650828 from (Petroselinum crispum)	1.78188	2.37757	2.07972	44.4235
CATMA2b16180	AT2G17500	AT2G17500.1	auxin efflux carrier family protein, contains auxin efflux carrier domain, Pfam:PF03547	1.71844	4.56395	3.14119	44.2998
CATMA2a37026	AT2G38750	ANNAT4	Annexins are a family of calcium dependent membrane binding proteins though to be involved in Golgi mediated secretion. This is one of four annexins identified in Arabidopsis.	1.3573	3.90171	2.62951	44.1405
CATMA2a00940	AT2G01890	AT2G01890.1	purple acid phosphatase, putative, contains Pfam profile: PF00149 calcineurin-like phosphoesterase; identical to purple acid phosphatase (GI:20257479) (Arabidopsis thaliana);	2.11955	3.12	2.61978	44.0884
CATMA1a16200	AT1G17190	AT1G17190.1	glutathione S-transferase, putative, One of three repeated glutathione transferases. 65% identical to glutathione transferase (Arabidopsis thaliana) (gi|4006934). Location of est 141C5T7 (gb|T46669); supported by fl cDNA gi:14326476gb:AF385691.	2.49559	3.32668	2.91113	43.7904
CATMA5a38350	AT5G42580	AT5G42580.1	cytochrome P450 family protein, similar to Cytochrome P450 93A1 (SP:Q42798) {Glycine max}; similar to flavone synthase II (GI:5081817) (Gerbera hybrida).	1.31866	3.12433	2.2215	43.7691
CATMA2a39655	AT2G41310	AT2G41310.1	two-component responsive regulator / response reactor 3 (RR3), identical to response reactor 3 GI:3273200 from (Arabidopsis thaliana); contains Pfam profile: PF00072 response regulator receiver domain	2.67557	4.49817	3.58687	42.9733
CATMA3a43040	AT3G49990	AT3G49990.1	expressed protein	1.24399	2.41857	1.83128	42.5376
CATMA2a41970	AT2G43550	AT2G43550.1	Encodes a defensin-like (DEFL) family protein.	1.06001	2.17768	1.61885	42.5055
CATMA1a67240	AT1G78120	AT1G78120.1	tetratricopeptide repeat (TPR)-containing protein, low similarity to SP|Q99615 DnaJ homolog subfamily C member 7 (Tetratricopeptide repeat protein 2) {Homo sapiens}; contains Pfam profile PF00515: TPR Domain	1.96239	2.41507	2.18873	41.8132
CATMA2a26255	AT2G27840	AT2G27840.1	histone deacetylase-related / HD-related, similar to nucleolar histone deacetylase HD2-p39 (Zea mays) GI:2257756; contains non-consensus donor splice site AT at exon2 and acceptor splice site AC at exon3.	0.921699	2.02934	1.47552	41.3291
CATMA3a38015	AT3G44990	AT3G44990.1	xyloglucan:xyloglucosyl transferase, putative / xyloglucan endotransglycosylase, putative / endo-xyloglucan transferase, putative	0.985337	3.03588	2.01061	41.0398
CATMA3a25710	AT3G25890	AT3G25890.1	encodes a member of the ERF (ethylene response factor) subfamily B-6 of ERF/AP2 transcription factor family. The protein contains one AP2 domain. There are 12 members in this subfamily including RAP2.11.	1.5476	2.31899	1.9333	40.4219
CATMA3a13460	AT3G14200	AT3G14200.1	DNAJ heat shock N-terminal domain-containing protein, low similarity to SP|O75190|DJB6_HUMAN DnaJ homolog subfamily B member 6 (Heat shock protein J2) {Homo sapiens}; contains Pfam profile PF00226 DnaJ domain	1.53178	2.69639	2.11409	39.8214
CATMA4a25920	AT4G24190	AT4G24190.1	shepherd protein (SHD) / clavata formation protein, putative, nearly identical to SHEPHERD (Arabidopsis thaliana) GI:19570872; contains Pfam profiles PF02518: ATPase, histidine kinase-, DNA gyrase B-, and HSP90-like domain protein, PF00183: Hsp90 pro	2.07924	2.9148	2.49702	39.7752
CATMA1a41350	AT1G50280	AT1G50280.1	phototropic-responsive NPH3 family protein, contains NPH3 family domain, Pfam:PF03000	5.76435	9.10795	7.43615	39.6708
CATMA3a43340	AT3G50300	AT3G50300.1	transferase family protein, similar to anthranilate N-hydroxycinnamoyl/benzoyltransferase, Dianthus caryophyllus (gi:2239091); contains Pfam transferase family domain PF002458	1.50674	3.9807	2.74372	39.6327
CATMA1a20570	AT1G21520	AT1G21520.1	expressed protein	1.11375	2.81284	1.9633	39.5358
CATMA1a29550	AT1G31320	AT1G31320.1	LOB domain protein 4 / lateral organ boundaries domain protein 4 (LBD4), identical to SP|Q9SHE9 LOB domain protein 4 {Arabidopsis thaliana}	1.69587	3.05448	2.37517	39.3354
CATMA4a24390	NA	CATMA4a24390	NA	1.91353	2.9588	2.43616	39.0479
CATMA1a02410	AT1G03530	AT1G03530.1	expressed protein, similar to hypothetical protein GB:O14360	1.42623	2.1095	1.76787	38.5542
CATMA5a10000	AT5G11240	AT5G11240.1	transducin family protein / WD-40 repeat family protein, contains 3 WD-40 repeats (PF00400); similar to uncharacterized protein KIAA0007 (GI:1663708) {Homo sapiens} 1.2e-11	1.01979	2.18883	1.60431	37.2575
CATMA3a52700.1	NA	CATMA3a52700.1	NA	0.983766	2.89267	1.93822	37.2153
CATMA1a27430	AT1G29470	AT1G29470.1	dehydration-responsive protein-related, similar to early-responsive to dehydration stress ERD3 protein (Arabidopsis thaliana) GI:15320410; contains Pfam profile PF03141: Putative methyltransferase	1.07638	2.04475	1.56056	36.4702
CATMA3a08210	AT3G09350	AT3G09350.1	armadillo/beta-catenin repeat family protein, contains Pfam profile: PF00514 armadillo/beta-catenin-like repeat	1.58426	3.48763	2.53594	36.1949
CATMA5a47350	AT5G51440	AT5G51440.1	23.5 kDa mitochondrial small heat shock protein (HSP23.5-M), similar to heat shock 22 kDa protein, mitochondrial precursor SP:Q96331 from (Arabidopsis thaliana); identified in Scharf, K-D., et al,Cell Stress & Chaperones (2001) 6: 225-237.	1.63601	4.8473	3.24165	36.1356
CATMA5a56630	AT5G60990	AT5G60990.1	DEAD/DEAH box helicase, putative (RH10), probable replication protein A1, Oryza sativa, EMBL:AF009179	1.88447	2.51008	2.19727	35.8828
CATMA1a28740	AT1G30690	AT1G30690.1	SEC14 cytosolic factor family protein / phosphoglyceride transfer family protein, contains Pfam PF00650 : CRAL/TRIO domain; contains Pfam PF03765 : CRAL/TRIO, N-terminus; similar to cytosolic factor (Phosphatidylinositol/phosphatidylcholine transfer	1.32636	2.00568	1.66602	35.8816
CATMA4a01770	AT4G01560	AT4G01560.1	brix domain-containing protein, contains Pfam domain, PF04427: Brix domain	1.12205	2.02984	1.57595	35.4538
CATMA1a30240	AT1G31970	AT1G31970.1	DEAD/DEAH box helicase, putative, similar to p68 RNA helicase (Schizosaccharomyces pombe) GI:173419	0.962373	2.26563	1.614	35.3011
CATMA4a24300	AT4G22570	AT4G22570.1	adenine phosphoribosyltransferase, putative, strong similarity to Adenine phosphoribosyltransferase (Hordeum vulgare subsp. vulgare) GI:9711921; contains Pfam profile PF00156: Phosphoribosyl transferase domain	1.42152	3.24116	2.33134	35.1348
CATMA1a55010	AT1G65730	AT1G65730.1	oligopeptide transporter OPT family protein, similar to iron-phytosiderophore transporter protein yellow stripe 1 (Zea mays) GI:10770865; contains Pfam profile PF03169: OPT oligopeptide transporter protein	1.3613	2.19452	1.77791	34.8438
CATMA5a46650	AT5G50600	AT5G50600.1	short-chain dehydrogenase/reductase (SDR) family protein, similar to sterol-binding dehydrogenase steroleosin GI:15824408 from (Sesamum indicum)	1.98225	4.20726	3.09476	34.6149
CATMA5a24720	AT5G27330	AT5G27330.1	expressed protein	1.77902	2.60372	2.19137	34.5964
CATMA1a44090	AT1G53060	AT1G53060.1	legume lectin family protein	2.11957	16.159	9.13929	34.5725
CATMA5a52850	AT5G57120	AT5G57120.1	expressed protein, weak similarity to SP|Q14978 Nucleolar phosphoprotein p130 {Homo sapiens}	1.23841	2.11241	1.67541	34.4762
CATMA5a39215	AT5G43400	AT5G43400.1	expressed protein, strong similarity to unknown protein (emb|CAB86628.1)	1.68059	2.05079	1.86569	33.976
CATMA1a26300	AT1G28100	AT1G28100.1	expressed protein	2.82959	3.7957	3.31265	33.7212
CATMA2a37033	AT2G38760	ANNAT3	Annexins are calcium binding proteins that are localized in the cytoplasm. When cytosolic Ca2+ increases, they relocate to the plasma membrane.	1.66223	9.67231	5.66727	33.6065
CATMA3a52020	AT3G58990	AT3G58990.1	aconitase C-terminal domain-containing protein, contains Pfam profile PF00694: Aconitase C-terminal domain	3.86195	2.2164	3.03918	32.9527
CATMA5a04010	AT5G04840	AT5G04840.1	bZIP protein	1.37723	3.08398	2.2306	32.9146
CATMA5a61570	AT5G66210	AT5G66210.1	calcium-dependent protein kinase family protein / CDPK family protein, contains Pfam domains, PF00069: Protein kinase domain and PF00036: EF hand	2.71432	2.13358	2.42395	32.6154
CATMA1a17855	AT1G18800	AT1G18800.1	nucleosome assembly protein (NAP) family protein, similar to SP|Q01105|SET protein (HLA-DR associated protein II) (PHAPII) (Phosphatase 2A inhibitor I2PP2A) {Homo sapiens}; contains Pfam profile PF00956: Nucleosome assembly protein (NAP)	2.28197	2.54219	2.41208	32.4782
CATMA5a37190	AT5G41590	AT5G41590.1	expressed protein, contains Pfam profile PF04525: Protein of unknown function (DUF567)	2.1311	2.17566	2.15338	32.4012
CATMA1a54180	AT1G64880	AT1G64880.1	ribosomal protein S5 family protein, contains similarity to 30S ribosomal protein S5 GI:6969105 from (Campylobacter jejuni)	1.76683	3.15393	2.46038	31.9682
CATMA3a52700	AT3G59670	AT3G59670.1	expressed protein, similar to expressed protein [Arabidopsis thaliana] (TAIR:At4g37440.1); similar to unknown protein [Oryza sativa (japonica cultivar-group)] (GB:AAV32239.1)	0.930868	2.33872	1.63479	31.6876
CATMA3a18390	AT3G18773	AT3G18773.1	zinc finger (C3HC4-type RING finger) family protein, contains Pfam profile: PF00097 zinc finger, C3HC4 type (RING finger)	4.19872	4.19245	4.19559	31.5506
CATMA5a07985	AT5G08640	AT5G08640.1	flavonol synthase 1 (FLS1), identical to SP|Q96330; contains PF03171 2OG-Fe(II) oxygenase superfamily	3.80287	6.57239	5.18763	31.1484
CATMA1a28090	AT1G30070	AT1G30070.1	SGS domain-containing protein, similar to calcyclin binding protein (Mus musculus) GI:3142331; contains Pfam profile PF05002: SGS domain	2.09118	5.45872	3.77495	30.7503
CATMA4a39630	AT4G38100	AT4G38100.1	expressed protein	1.49747	3.30788	2.40268	30.3679
CATMA3a55026	AT3G61890	AT3G61890.1	homeobox-leucine zipper protein 12 (HB-12) / HD-ZIP transcription factor 12, identical to homeobox-leucine zipper protein ATHB-12 (GI:6899887) (Arabidopsis thaliana)	1.13442	2.14215	1.63829	30.2581
CATMA5a59336	AT5G63810	AT5G63810.1	beta-galactosidase, putative / lactase, putative, similar to beta-galactosidase GI:7939621 from (Lycopersicon esculentum); contains Pfam profile PF01301: Glycosyl hydrolases family 35	1.64708	2.22962	1.93835	30.1408
CATMA1a03107	AT1G04250	AT1G04250.1	auxin-responsive protein / indoleacetic acid-induced protein 17 (IAA17), Identical to SP|P93830 Auxin-responsive protein IAA17 (Indoleacetic acid-induced protein 17) {Arabidopsis thaliana}; ESTs gb|H36782 and gb|F14074 come from this gene	1.60842	2.71571	2.16207	29.8264
CATMA2a32040	AT2G33840	AT2G33840.1	tRNA synthetase class I (W and Y) family protein, similar to SP|P54577 Tyrosyl-tRNA synthetase (EC 6.1.1.1) (Tyrosyl--tRNA ligase) (TyrRS) {Homo sapiens}; contains Pfam profile PF00579: tRNA synthetases class I (W and Y)	2.91991	3.64413	3.28202	29.4269
CATMA3a56645	AT3G63440	AT3G63440.1	similar to FAD-binding domain-containing protein / cytokinin oxidase family protein [Arabidopsis thaliana] (TAIR:At2g41510.1); similar to putative cytokinin oxidase [Oryza sativa (japonica cultivar-group)] (GB:XP_463696.1); similar to putative cytoki	1.84026	2.37509	2.10768	29.3788
CATMA5a56410	AT5G60670	AT5G60670.1	60S ribosomal protein L12 (RPL12C), 60S RIBOSOMAL PROTEIN L12 (like), Arabidopsis thaliana, PIR:T45883	1.95659	2.23707	2.09683	29.1921
CATMA3a17620	AT3G18130	AT3G18130.1	guanine nucleotide-binding family protein / activated protein kinase C receptor (RACK1), identical to guanine nucleotide-binding protein; activated protein kinase C receptor; RACK1 (GI:9294068) {Arabidopsis thaliana}; contains Pfam profile: PF00400 W	1.38831	2.01573	1.70202	28.9513
CATMA3a14430	AT3G15080	AT3G15080.1	exonuclease family protein, contains exonuclease domain, Pfam:PF00929	1.55785	2.6227	2.09027	28.7293
CATMA3a49990	AT3G57000	AT3G57000.1	nucleolar essential protein-related, contains weak similarity to Nucleolar essential protein 1 (Essential for mitotic growth 1) (Swiss-Prot:Q06287) (Saccharomyces cerevisiae)	0.92031	2.14468	1.53249	28.6614
CATMA5a11800	AT5G13570	AT5G13570.1	MutT/nudix family protein, similar to mRNA-decapping enzyme (Homo sapiens) GI:23268269; contains Pfam profile PF00293: NUDIX domain	4.51424	2.72236	3.6183	28.4397
CATMA5a34300	AT5G38720	AT5G38720.1	expressed protein, predicted protein, Drosophila melanogaster	1.13782	2.20403	1.67093	28.3367
CATMA3a22880	NA	CATMA3a22880	NA	1.44014	4.17743	2.80879	28.0263
CATMA4a05770	AT5G08180	AT5G08180.1	ribosomal protein L7Ae/L30e/S12e/Gadd45 family protein, Similar to NHP2/L7Ae family proteins, see SWISSPROT:P32495 and PMID:2063628.	1.79486	2.66484	2.22985	27.8874
CATMA1a56680	AT1G67360	AT1G67360.1	rubber elongation factor (REF) family protein, contains Pfam profile: PF05755 rubber elongation factor protein (REF)	0.993036	2.55273	1.77288	27.8163
CATMA4a01180	AT4G01010	AT4G01010.1	cyclic nucleotide-regulated ion channel, putative (CNGC13), similar to CaM-regulated potassium ion channel (ACBK1) GI:8515883 from (Arabidopsis thaliana)	5.34987	2.7887	4.06928	27.6662
CATMA1a63420	AT1G74055	AT1G74055.1	expressed protein	0.97105	2.03848	1.50476	27.5102
CATMA4a05520	AT4G04940	AT4G04940.1	transducin family protein / WD-40 repeat family protein, contains seven G-protein beta WD-40 repeats	1.72813	2.85929	2.29371	27.4695
CATMA3b13000	AT3G13790	AT3G13790.1	beta-fructosidase (BFRUCT1) / beta-fructofuranosidase / cell wall invertase, identical to beta-fructofuranosidase GI:402740 from (Arabidopsis thaliana)	1.21425	2.56764	1.89095	27.2217
CATMA2a16180	AT2G17500	AT2G17500.1	auxin efflux carrier family protein, contains auxin efflux carrier domain, Pfam:PF03547	1.68533	2.81618	2.25076	27.0383
CATMA1a61660	AT1G72440	AT1G72440.1	CCAAT-box-binding transcription factor-related, similar to CCAAT-box-binding transcription factor (CCAAT-binding factor) (CBF) (Swiss-Prot:Q03701) (Homo sapiens), GB:P53569 (Mus musculus)	0.666772	2.65801	1.66239	26.9436
CATMA2a16890	AT2G18220	AT2G18220.1	expressed protein, contains Pfam domain PF03715: Uncharacterised protein family (UPF0120)	1.46605	2.14353	1.80479	26.8211
CATMA3a10615	AT3G11670	AT3G11670.1	digalactosyldiacylglycerol synthase 1 (DGD1) / MGDG:MGDG galactosyltransferase / galactolipid galactosyltransferase, identical to digalactosyldiacylglycerol synthase (DGD1) GI:5354158 (Arabidopsis thaliana)	1.11508	2.24907	1.68207	26.6502
CATMA3a12350	AT3G13230	AT3G13230.1	expressed protein	1.25635	2.09525	1.6758	26.6298
CATMA1a28300	AT1G30270	AT1G30270.1	CBL-interacting protein kinase 23 (CIPK23), identical to CBL-interacting protein kinase 23 (Arabidopsis thaliana) gi|14486386|gb|AAK61494	1.81985	2.10572	1.96278	26.3772
CATMA1a02250	AT1G03370	AT1G03370.1	C2 domain-containing protein / GRAM domain-containing protein, contains Pfam profiles PF00168: C2 domain; contains PF02893: GRAM domain; similar to Chain A, Crystal Structure Of Synaptotagmin Iii C2aC2B Length(GI:6980525); similar to Synaptotagmin II	0.9708	2.16413	1.56746	26.266
CATMA4a17180	AT4G16370	AT4G16370.1	oligopeptide transporter OPT family protein, similar to oligopeptide transporter Opt1p (Candida albicans) GI:2367386; contains Pfam profile PF03169: OPT oligopeptide transporter protein	1.36486	2.01559	1.69022	26.2317
CATMA1a68260	AT1G79140	AT1G79140.1	expressed protein	1.52269	2.83207	2.17738	26.0538
CATMA5a41760	AT5G45775	AT5G45775.1	60S ribosomal protein L11 (RPL11D)	2.32169	2.80471	2.5632	25.7913
CATMA4a19065	AT4G18040	AT4G18040.1	eukaryotic translation initiation factor 4E 1 / eIF-4E1 / mRNA cap-binding protein 1 (EIF4E1), identical to SP|O23252 Eukaryotic translation initiation factor 4E (eIF-4E) (eIF4E) (mRNA cap-binding protein) (eIF-4F 25 kDa subunit) (eIF-4F P26 subunit)	1.64712	2.57214	2.10963	25.7512
CATMA5a07450	AT5G08180	AT5G08180.1	ribosomal protein L7Ae/L30e/S12e/Gadd45 family protein, Similar to NHP2/L7Ae family proteins, see SWISSPROT:P32495 and PMID:2063628.	1.62982	2.06368	1.84675	25.698
CATMA1a02420	AT1G03530	AT1G03530.1	expressed protein, similar to hypothetical protein GB:O14360	0.921656	2.14792	1.53479	25.6515
CATMA5a17690	AT5G19260	AT5G19260.1	expressed protein, various predicted proteins	2.233	2.38957	2.31128	25.6481
CATMA5a52920	AT5G57180	AT5G57180.1	expressed protein, ; supporting cDNA gi|13991645|gb|AF359387.1|AF359387	1.26636	2.7237	1.99503	25.2461
CATMA1a32860	AT1G34550	AT1G34550.1	expressed protein, contains Pfam profile PF04765: Protein of unknown function (DUF616); expression supported by MPSS	1.9045	3.04023	2.47236	25.1375
CATMA5a22060	AT5G24460	AT5G24460.1	expressed protein	1.5054	3.01243	2.25891	24.5613
CATMA3a44250	AT3G51270	AT3G51270.1	RIO1 family protein, contains Pfam profile PF01163: RIO1 family	1.23521	2.3962	1.8157	24.3709
CATMA2a29230	AT2G31060	AT2G31060.1	elongation factor family protein, contains Pfam profiles: PF00009 elongation factor Tu GTP binding domain, PF00679 elongation factor G C-terminus, PF03144 elongation factor Tu domain 2	2.37141	2.58363	2.47752	24.1137
CATMA5a59940	AT5G64510	AT5G64510.1	expressed protein	1.31287	5.76739	3.54013	24.0558
CATMA1a45030	AT1G53920	AT1G53920.1	GDSL-motif lipase/hydrolase family protein, similar to Anther-specific proline-rich proteins SP|P40603 SP|P40602 from {Arabidopsis thaliana}; contains Pfam profile PF00657: GDSL-like Lipase/Acylhydrolase	2.11205	3.01263	2.56234	24.0368
CATMA4a10490	AT4G10450	AT4G10450.1	60S ribosomal protein L9 (RPL90D), ribosomal protein L9, cytosolic - garden pea, PIR2:S19978	1.51804	2.08057	1.79931	24.0274
CATMA3a37380	AT3G44450	AT3G44450.1	expressed protein	0.710785	2.39269	1.55174	23.9461
CATMA4a20430	AT4G19230	AT4G19230.1	cytochrome P450 family protein, cytochrome P450, Arabidopsis thaliana; supported by cDNA: gi_15293092_gb_AY050980.1_	1.48535	2.45204	1.9687	23.9101
CATMA4a41393	AT4G39980	AT4G39980.1	2-dehydro-3-deoxyphosphoheptonate aldolase 1 / 3-deoxy-D-arabino-heptulosonate 7-phosphate synthase 1 / DAHP synthetase 1 (DHS1), nearly identical to SP|P29965	1.45814	2.00626	1.7322	23.5657
CATMA1a44600	AT1G53590	AT1G53590.1	C2 domain-containing protein	2.45807	2.71373	2.5859	23.5089
CATMA5a52700	AT5G56950	AT5G56950.1	nucleosome assembly protein (NAP), putative, similar to nucleosome assembly protein 1 (Glycine max) GI:1161252; contains Pfam profile PF00956: Nucleosome assembly protein (NAP)	1.53639	2.19341	1.8649	23.4975
CATMA3a23210	AT3G23210	AT3G23210.1	basic helix-loop-helix (bHLH) family protein, similar to hypothetical protein GB:CAB10220 from (Arabidopsis thaliana)	1.16186	2.21089	1.68637	23.4128
CATMA3b28115	AT3G28290	AT3G28290.1	Possesses a transmembrane domain and a small region that has sequence similarities to integrins from fungi, insects and humans. Is localized to plasma membrane and cytoplasm. Integrin-related protein 14a, identical to At14a protein GI:11994573 (Arabi	1.13631	2.43488	1.7856	23.3987
CATMA2a24050	AT2G25670	AT2G25670.1	expressed protein	1.8633	2.05901	1.96116	23.391
CATMA1a15390	AT1G16400	AT1G16400.1	cytochrome P450 family protein, similar to gb|AF069494 cytochrome P450 from Sinapis alba and is a member of the PF|00067 Cytochrome P450 family; identical to cytochrome P450 CYP79F2 (CYP79F2) GI:10946207	2.47111	3.00397	2.73754	23.3722
CATMA1a47190	AT1G56110	AT1G56110.1	nucleolar protein Nop56, putative, similar to XNop56 protein (Xenopus laevis) GI:14799394; contains Pfam profile PF01798: Putative snoRNA binding domain	1.77768	2.28318	2.03043	23.315
CATMA5a19700	AT5G21160	AT5G21160.1	La domain-containing protein / proline-rich family protein, contains proline-rich extensin domains, INTERPRO:IPR002965, PF05383: La domain	1.50236	2.08309	1.79273	23.2071
CATMA3a20250	AT3G20540	AT3G20540.1	DNA-directed DNA polymerase family protein, similar to PolI-like DNA polymerase (Oryza sativa) GI:19912795; contains Pfam profiles PF01612: 3'-5' exonuclease, PF00476: DNA polymerase I family A	1.38862	3.5773	2.48296	23.1686
CATMA1a48800	AT1G59760	AT1G59760.1	ATP-dependent RNA helicase, putative, similar to SP|P47047 ATP-dependent RNA helicase DOB1 {Saccharomyces cerevisiae}, HUA enhancer 2 (Arabidopsis thaliana) GI:16024936; contains Pfam profiles PF00270: DEAD/DEAH box helicase, PF00271: Helicase conser	1.15598	3.12208	2.13903	23.0779
CATMA5a60970	AT5G65630	AT5G65630.1	DNA-binding bromodomain-containing protein, similar to 5.9 kb fsh membrane protein (Drosophila melanogaster) GI:157455; contains Pfam profile PF00439: Bromodomain	1.42275	2.02147	1.72211	23.0568
CATMA4a37973	AT4G36360	AT4G36360.1	beta-galactosidase, putative / lactase, putative, similar to beta-galactosidase precursor SP:P48980 from (Lycopersicon esculentum)	1.24666	2.56435	1.9055	23.0135
CATMA1a15270	AT1G16280	AT1G16280.1	DEAD/DEAH box helicase, putative, similar to gb|L13612 DEAD-box protein (dbp45A) from Drosophila melanogaster and is a member of PF|00270 DEAD/DEAH box helicase family	1.15055	2.04069	1.59562	22.6332
CATMA1a67950	AT1G78850	AT1G78850.1	curculin-like (mannose-binding) lectin family protein, low similarity to ser/thr protein kinase from Zea mays (GI:2598067); contains Pfam lectin (probable mannose binding) domain PF01453 but not the protein kinase domain of the Z. mays protein	2.35444	2.11891	2.23667	22.4137
CATMA3a42270	AT3G49240	AT3G49240.1	pentatricopeptide (PPR) repeat-containing protein, contains Pfam profile PF01535: PPR repeat	0.791411	2.50884	1.65012	22.3164
CATMA3a08080	AT3G09210	AT3G09210.1	KOW domain-containing transcription factor family protein, ; est match	1.79091	2.24368	2.0173	22.2367
CATMA4a29500	AT4G27860	AT4G27860.1	integral membrane family protein, contains Pfam PF01988: Integral membrane protein	1.56601	2.0233	1.79465	22.0417
CATMA2a27920	AT2G29560	AT2G29560.1	enolase, putative, similar to enolase (Spinacia oleracea) gi|8919731|emb|CAB96173	2.20671	2.11457	2.16064	21.9995
CATMA3a08320	AT3G09450	AT3G09450.1	expressed protein	0.676346	2.22015	1.44825	21.9274
CATMA1a06200	AT1G07150	AT1G07150.1	protein kinase family protein, contains eukaryotic protein kinase domain, INTERPRO:IPR000719	1.43536	2.15949	1.79742	21.9229
CATMA1a05220	AT1G06180	AT1G06180.1	myb family transcription factor, identical to GB:CAA90748 GI:1263093 from (Arabidopsis thaliana);contains PFAM profile:PF00249	1.29647	2.50063	1.89855	21.9126
CATMA5a61530	AT5G66170	AT5G66170.1	senescence-associated family protein, contains similarity to ketoconazole resistant protein GI:928938 and senescence-associated protein GI:1046268 from (Arabidopsis thaliana)	1.37097	2.10326	1.73711	21.8989
CATMA4a36700	AT4G34910	AT4G34910.1	DEAD/DEAH box helicase, putative (RH16), identical to cDNA DEAD box RNA helicase, RH16 GI:3776006	2.28169	3.18725	2.73447	21.8893
CATMA2a35160	AT2G36885	AT2G36885.1	expressed protein	2.26683	3.43365	2.85024	21.8625
CATMA1a20670	AT1G21600	AT1G21600.1	expressed protein, similar to hypothetical protein GB:AAD41412 GI:5263310 from (Arabidopsis thaliana)	2.40954	2.03715	2.22334	21.8622
CATMA4a11095	AT4G11010	AT4G11010.1	nucleoside diphosphate kinase 3, mitochondrial (NDK3), identical to Nucleoside diphosphate kinase III, mitochondrial precursor (NDK III) (NDP kinase III) (NDPK III) (SP:O49203) (Arabidopsis thaliana); contains Pfam PF00334 : Nucleoside diphosphate k	3.07665	2.03195	2.5543	21.7592
CATMA5a21600	AT5G24070	AT5G24070.1	peroxidase family protein, similar to cationic peroxidase, Peanut (Arachis hypogaea) GP|166475|gb|AAA32676; contains Pfam profile PF00141: Peroxidase	1.28394	2.14918	1.71656	21.6949
CATMA3a55770	AT3G62600	AT3G62600.1	DNAJ heat shock family protein, similar to DnaJ homolog subfamily B member 11 precursor (SP:Q99KV1){Mus musculus}; contains Pfam PF00226: DnaJ domain; contains PfaPF01556: DnaJ C terminal regionm	1.83205	2.50331	2.16768	21.5906
CATMA2a37070	AT2G38800	AT2G38800.1	calmodulin-binding protein-related, contains similarity to potato calmodulin-binding protein PCBP GI:17933110 from (Solanum tuberosum)	1.64128	2.26488	1.95308	21.4636
CATMA1a10670	AT1G11670	AT1G11670.1	MATE efflux family protein, similar to ripening regulated protein DDTFR18 (Lycopersicon esculentum) GI:12231296; contains Pfam profile PF01554: Uncharacterized membrane protein family; EST gb|W43487 comes from this gene	3.36001	2.99451	3.17726	21.4634
CATMA2a36695	AT2G38400	AGT3	alanine:glyoxylate aminotransferase 2 homolog (AGT3) mRNA,	2.92722	2.37332	2.65027	21.3036
CATMA1a11790	AT1G12800	AT1G12800.1	S1 RNA-binding domain-containing protein, contains Pfam domain, PF00575: S1 RNA binding domain	1.22844	2.58619	1.90732	21.208
CATMA3a28630	AT3G28730	AT3G28730.1	structure-specific recognition protein 1 / high mobility group protein / HMG protein, nearly identical to SP|Q05153 Structure-specific recognition protein 1 homolog (HMG protein) {Arabidopsis thaliana}; contains Pfam profile PF00505: HMG (high mobili	2.98044	2.03014	2.50529	21.1232
CATMA3a29035	AT3G29030	AT3G29030.1	expansin, putative (EXP5), identical to expansin At-EXP5 GB:AAB38071 from (Arabidopsis thaliana); alpha-expansin gene family, PMID:11641069	1.55694	2.19853	1.87774	21.0729
CATMA4a10345	AT4G10310	AT4G10310.1	sodium transporter (HKT1), identical to sodium transporter AtHKT1 (Arabidopsis thaliana) gi|7716474|gb|AAF68393	0.964856	2.19538	1.58012	21.0132
CATMA1a51245	AT1G62180	37347	Encodes a protein disulfide isomerase-like (PDIL) protein, a member of a multigene family within the thioredoxin (TRX) superfamily. This protein also belongs to the adenosine 5'-phosphosulfate reductase-like (APRL) group.	2.81824	2.79463	2.80644	20.9764
CATMA4a06600	AT4G07410	AT4G07410.1	transducin family protein / WD-40 repeat family protein, contains 7 WD-40 repeats (PF00400) (2 weak); similar to Vegetatible incompatibility protein HET-E-1 (SP:Q00808) {Podospora anserina}	2.10538	2.10184	2.10361	20.8848
CATMA3a52270	AT3G59220	AT3G59220.1	pirin, putative, similar to SP|O00625 Pirin {Homo sapiens}; contains Pfam profile PF02678: Pirin	1.05567	2.38395	1.71981	20.8703
CATMA3a26610	AT3G26850	AT3G26850.1	expressed protein	0.928378	2.00291	1.46564	20.6518
CATMA4a27050	AT4G25340	AT4G25340.1	immunophilin-related / FKBP-type peptidyl-prolyl cis-trans isomerase-related, immunophilin FKBP46 - Spodoptera frugiperda (fall armyworm),PIR2:A55320	1.8006	3.25818	2.52939	20.5939
CATMA1a44890	AT1G53800	AT1G53800.1	expressed protein	1.43914	2.10055	1.76984	20.5398
CATMA1a14085	AT1G15100	AT1G15100.1	zinc finger (C3HC4-type RING finger) family protein, contains Pfam profile: PF00097 zinc finger, C3HC4 type (RING finger)	1.48345	2.98488	2.23416	20.5386
CATMA2a43860	AT2G45460	AT2G45460.1	forkhead-associated domain-containing protein / FHA domain-containing protein	2.31656	2.66437	2.49046	20.4397
CATMA1a67640	AT1G78570	AT1G78570.1	NAD-dependent epimerase/dehydratase family protein, similar to dTDP-glucose 4,6-dehydratase from Aneurinibacillus thermoaerophilus GI:16357461, RmlB from Leptospira borgpetersenii GI:4234803; contains Pfam profile PF01370 NAD dependent epimerase/dehy	3.68664	2.91918	3.30291	20.3906
CATMA3a21150	AT3G21300	AT3G21300.1	RNA methyltransferase family protein, contains TIGRfam TIGR00479: RNA methyltransferase, TrmA family	1.77853	2.10478	1.94166	20.3584
CATMA2a32700	AT2G34570	AT2G34570.1	expressed protein, contains Pfam profile: PF04900 protein of unknown function, DUF652	1.5441	2.31764	1.93087	20.3363
CATMA5a51110	AT5G55390	AT5G55390.1	hydroxyproline-rich glycoprotein family protein	1.36478	2.2217	1.79324	20.2819
CATMA1a07105	AT1G08130	AT1G08130.1	DNA ligase / polydeoxyribonucleotide synthase (ATP), identical to SP|Q42572 DNA ligase (EC 6.5.1.1) (Polydeoxyribonucleotide synthase (ATP)) {Arabidopsis thaliana}; contains Pfam profiles: PF01068 ATP dependent DNA ligase domain, PF04679 ATP dependen	1.07396	2.36067	1.71732	20.2161
CATMA5a19900	AT5G22440	AT5G22440.1	60S ribosomal protein L10A (RPL10aC)	2.80812	2.28179	2.54495	20.1214
CATMA2a27880	AT2G29500	AT2G29500.1	17.6 kDa class I small heat shock protein (HSP17.6B-CI), contains Pfam PF00011: Hsp20/alpha crystallin family; identified in Scharf, K-D., et al, Cell Stress & Chaperones (2001) 6: 225-237.	1.44582	9.51201	5.47891	20.1108
CATMA5a52620	AT5G56860	AT5G56860.1	zinc finger (GATA type) family protein, similar to unknown protein (pir |T04270)	1.82706	2.32877	2.07791	20.0529
CATMA1b17040	AT1G18040	AT1G18040.1	cell division protein kinase, putative, similar to cell division protein kinase 7 (Homo sapiens) SWISS-PROT:P50613	2.23309	2.20984	2.22146	20.003
CATMA4a33430	AT4G31790	AT4G31790.1	diphthine synthase, putative (DPH5), similar to Diphthine synthase (Diphtamide biosynthesis methyltransferase) (DPH5) (SP:P32469) (Saccharomyces cerevisiae); similar to CGI-30 protein (GI:4680699) (Homo sapiens); similar to methyltransferase DPH5,	1.21172	2.02023	1.61598	19.9877
CATMA1a50950	AT1G61870	AT1G61870.1	pentatricopeptide (PPR) repeat-containing protein, contains Pfam profile PF01535: PPR repeat	3.2023	2.83124	3.01677	19.9047
CATMA1a58410	AT1G69040	ACR4	ACT-domain containing protein involved in feedback regulation of amino acid metabolism	1.80797	2.27666	2.04231	19.8998
CATMA5a60980	AT5G65640	AT5G65640.1	basic helix-loop-helix (bHLH) family protein	1.2182	2.01306	1.61563	19.7616
CATMA3a10650	AT3G11720	AT3G11720.1	expressed protein	1.30833	2.78809	2.04821	19.5247
CATMA5a41280	AT5G45330	AT5G45330.1	expressed protein, ; expression supported by MPSS	1.33498	2.0041	1.66954	19.506
CATMA1a44825	AT1G53750	AT1G53750.1	26S proteasome AAA-ATPase subunit (RPT1a), similar to 26S proteasome ATPase subunit GI:1395190 from (Spinacia oleracea)	3.1395	2.47845	2.80897	19.4744
CATMA1a57210	AT1G67810	AT1G67810.1	Fe-S metabolism associated domain-containing protein, contains Pfam PF02657: Fe-S metabolism associated domain	2.43881	2.30527	2.37204	19.4526
CATMA1a41460	AT1G50410	AT1G50410.1	SNF2 domain-containing protein / helicase domain-containing protein / RING finger domain-containing protein, similar to transcription factor RUSH-1alpha (Oryctolagus cuniculus) GI:1655930; contains Pfam profiles PF00271: Helicase conserved C-terminal	1.76756	2.22237	1.99497	19.3949
CATMA3a21410	AT3G21540	AT3G21540.1	transducin family protein / WD-40 repeat family protein, contains Pfam profile: PF00400 WD domain, G-beta repeat (10 copies); similar to WD-repeat protein 3 (SP:Q9UNX4) (Homo sapiens)	1.55287	2.29833	1.9256	19.2199
CATMA4a32090	AT4G30480	AT4G30480.1	tetratricopeptide repeat (TPR)-containing protein, similar to SP|Q99614 Tetratricopeptide repeat protein 1 {Homo sapiens}; contains Pfam profile PF00515: TPR Domain	5.37254	3.28683	4.32969	19.1891
CATMA4a17600	AT4G16660	AT4G16660.1	heat shock protein 70, putative / HSP70, putative	1.33201	2.22987	1.78094	19.1711
CATMA1a18460	AT1G19450	AT1G19450.1	integral membrane protein, putative / sugar transporter family protein, similar to GB:U43629 GI:1209756 integral membrane protein from (Beta vulgaris); contains Pfam profile PF00083: major facilitator superfamily protein; contains TIGRfam TIGR00879:	1.72083	2.09942	1.91012	19.0753
CATMA1a58375	AT1G68990	AT1G68990.1	DNA-directed RNA polymerase, mitochondrial (RPOMT), identical to SP|P92969 DNA-directed RNA polymerase, mitochondrial precursor (EC 2.7.7.6) {Arabidopsis thaliana}	0.884277	2.27248	1.57838	18.9556
CATMA4a29130	AT4G27560	AT4G27560.1	glycosyltransferase family protein, contains Pfam profile: PF00201 UDP-glucoronosyl and UDP-glucosyl transferase	1.56932	2.1832	1.87626	18.879
CATMA5a10020	AT5G11260	AT5G11260.1	bZIP protein HY5 (HY5), identical to HY5 protein GI:2251085 from (Arabidopsis thaliana)	1.07925	2.1926	1.63592	18.8719
CATMA4a15510	AT4G15020	AT4G15020.1	expressed protein, contains Pfam profile PF04937: Protein of unknown function (DUF 659)	1.01922	2.02733	1.52328	18.8148
CATMA5a53320	AT5G57610	AT5G57610.1	protein kinase family protein, similar to protein kinase (Glycine max) GI:170047, MAP3K delta-1 protein kinase (Arabidopsis thaliana) GI:2253010; contains Pfam profile: PF00069 Eukaryotic protein kinase domain	1.60936	2.81761	2.21348	18.8109
CATMA4a33070	AT4G31390	AT4G31390.1	ABC1 family protein, contains Pfam domain, PF03109: ABC1 family	1.87135	2.0833	1.97732	18.6967
CATMA3a48460	AT3G55510	AT3G55510.1	expressed protein	1.31686	2.29056	1.80371	18.5543
CATMA3a24390	AT3G24500	AT3G24500.1	One of three genes in A. thaliana encoding multiprotein bridging factor 1, a highly conserved transcriptional coactivator. May serve as a bridging factor between a bZIP factor and TBP. Its expression is specifically elevated in response to pathogen	1.39339	4.89403	3.14371	18.3439
CATMA2a25540	AT2G27170	AT2G27170.1	similar to SMC2-like condensin, putative (SMC2) (TITAN3) [Arabidopsis thaliana] (TAIR:At5g62410.1); similar to cohesin complex subunit [Gallus gallus] (GB:NP_989848.1); similar to chondroitin sulfate proteoglycan 6 [Mus musculus] (GB:NP_031816.2); si	2.4029	2.59881	2.50086	18.3399
CATMA3a47980	NA	CATMA3a47980	NA	1.42105	2.23583	1.82844	18.3218
CATMA2a36300	AT2G37990	AT2G37990.1	ribosome biogenesis regulatory protein (RRS1) family protein, contains Pfam profile PF04939: Ribosome biogenesis regulatory protein (RRS1); similar to Ribosome biogenesis regulatory protein homolog (Swiss-Prot:Q15050) (Homo sapiens)	1.99079	2.11476	2.05277	18.2659
CATMA4a19330	AT4G18280	AT4G18280.1	glycine-rich cell wall protein-related, glycine-rich protein 1.0 precursor, Phaseolus vulgaris, PIR1:S01821	0.98668	2.0772	1.53194	18.2447
CATMA1a17460	AT1G18420	AT1G18420.1	expressed protein, contains Pfam profile PF01027: Uncharacterized protein family UPF0005	1.44915	2.78526	2.1172	18.2299
CATMA1a06420	AT1G07350	AT1G07350.1	transformer serine/arginine-rich ribonucleoprotein, putative, similar to GB:Y09506 from (Nicotiana tabacum) (Plant Mol. Biol. 35 (3), 261-269 (1997))	1.18817	2.00021	1.59419	18.1587
CATMA4a39130	AT4G37590	AT4G37590.1	phototropic-responsive NPH3 family protein, contains NPH3 family domain, Pfam:PF03000	3.15545	2.57058	2.86302	18.1221
CATMA3a18250	AT3G18640	AT3G18640.1	zinc finger protein-related, contains similarity to zinc finger proteins (CCCH type)	0.84042	2.1482	1.49431	18.0738
CATMA1a03060	AT1G04190	AT1G04190.1	tetratricopeptide repeat (TPR)-containing protein, low similarity to protein antigen LmSTI1 (Leishmania major) GI:1698880; contains Pfam profile PF00515 TPR Domain; EST gb|Z47802 and gb|Z48402 come from this gene	2.19465	2.38266	2.28865	18.0594
CATMA1a19830	AT1G20770	AT1G20770.1	expressed protein	3.0031	2.4586	2.73085	18.0198
CATMA4a26410	AT4G24700	AT4G24700.1	expressed protein	1.16697	2.11635	1.64166	17.8353
CATMA4a15100	AT4G14700	AT4G14700.1	replication control protein, putative, similar to origin recognition complex subunit 1 (Replication control protein 1) (Homo sapiens) SWISS-PROT:Q13415	2.38433	2.31147	2.3479	17.6314
CATMA3a11960	NA	CATMA3a11960	NA	2.83688	2.3629	2.59989	17.5551
CATMA5a00050	AT5G01030	AT5G01030.1	expressed protein	1.48976	2.45752	1.97364	17.2638
CATMA1a14460	AT1G15420	AT1G15420.1	expressed protein	0.983818	2.23699	1.6104	17.0905
CATMA3a33374	NA	CATMA3a33374	NA	1.21514	2.32494	1.77004	17.0682
CATMA4a23570	AT4G21890	AT4G21890.1	expressed protein	4.33012	4.9408	4.63546	16.9244
CATMA5a43910	AT5G47940	AT5G47940.1	expressed protein	2.57038	2.57362	2.572	16.8729
CATMA1a70090	AT1G80870	AT1G80870.1	protein kinase family protein, contains eukaryotic protein kinase domain, INTERPRO:IPR000719	1.17117	2.09378	1.63248	16.4825
CATMA2a44130	AT2G45730	AT2G45730.1	eukaryotic initiation factor 3 gamma subunit family protein, contains Pfam profile PF04189: Eukaryotic initiation factor 3, gamma subunit	2.96182	2.3688	2.66531	16.4063
CATMA1a27885	AT1G29900	AT1G29900.1	carbamoyl-phosphate synthase family protein, similar to carbamoylphosphate synthetase GI:6552726 from (Medicago sativa); contains Pfam profiles PF02786: Carbamoyl-phosphate synthase L chain ATP binding domain, PF00289: Carbamoyl-phosphate synthase L	1.87613	2.56926	2.22269	16.3423
CATMA1a62950	AT1G73630	AT1G73630.1	calcium-binding protein, putative, similar to calcium binding protein GI:14589311 from (Sesbania rostrata); contains Pfam profile: PF00036 EF hand (4 copies)	1.50003	2.4285	1.96427	16.2704
CATMA1a27300	AT1G29320	AT1G29320.1	transducin family protein / WD-40 repeat family protein, contains 3 WD-40 repeats (PF00400); similar to meiotic recombination protein REC14 (GI:11139242) (Homo sapiens); similar to unknown protein GI:13623493 (Homo sapiens)	1.31184	3.13913	2.22548	16.19
CATMA2a19060	AT2G20560	AT2G20560.1	DNAJ heat shock family protein, SP|Q9UDY4 DnaJ homolog subfamily B member 4 (Heat shock 40 kDa protein 1 homolog) {Homo sapiens}; contains Pfam profile PF00226: DnaJ domain	0.881791	3.06437	1.97308	16.1513
CATMA3a45970	AT3G53020	AT3G53020.1	Regulated by TCP20.	1.76609	2.20475	1.98542	16.1499
CATMA5a16080	AT5G17790	AT5G17790.1	zinc finger (Ran-binding) family protein, contains Pfam domain, PF00641: Zn-finger in Ran binding protein and others	1.77221	2.0378	1.90501	16.1485
CATMA5a47870	AT5G51940	AT5G51940.1	DNA-directed RNA polymerase II, putative, similar to SP|O88828 DNA-directed RNA polymerase II 14.4 kDa polypeptide (EC 2.7.7.6) (RPB6) (RPB14.4) {Rattus norvegicus}; contains Pfam profile PF01192: RNA polymerases K / 14 to 18 kDa subunit	1.49213	2.41254	1.95233	16.0691
CATMA1a05280	AT1G06230	AT1G06230.1	DNA-binding bromodomain-containing protein, contains bromodomain, INTERPRO:IPR001487	1.42197	2.42927	1.92562	16.0342
CATMA2a20130	AT2G21440	AT2G21440.1	RNA recognition motif (RRM)-containing protein, contains InterPro entry IPR000504: RNA-binding region RNP-1 (RNA recognition motif) (RRM)	0.972086	2.04172	1.5069	15.9353
CATMA3a56070	AT3G62900	AT3G62900.1	expressed protein, ; expression supported by MPSS	1.38287	2.0814	1.73214	15.9062
CATMA4a08100	AT4G08350	AT4G08350.1	KOW domain-containing transcription factor family protein, chromatin structural protein homolog Supt5hp - Mus musculus,PID:g2754752	0.867571	2.30223	1.5849	15.8991
CATMA5a17430	AT5G19030	AT5G19030.1	RNA recognition motif (RRM)-containing protein, low similarity to Cold-inducible RNA-binding protein (Glycine-rich RNA-binding protein CIRP) from {Homo sapiens} SP|Q14011, {Rattus norvegicus} SP|Q61413,{Xenopus laevis} SP|O93235; contains InterPro en	1.03645	2.02685	1.53165	15.8921
CATMA3a01490	AT3G02530	AT3G02530.1	chaperonin, putative, similar to SWISS-PROT:P80317- T-complex protein 1, zeta subunit (TCP-1-zeta) (Mus musculus); contains Pfam:PF00118 domain, TCP-1/cpn60 chaperonin family	2.26222	2.00891	2.13556	15.8114
CATMA3b25075	AT3G25230	AT3G25230.1	peptidyl-prolyl cis-trans isomerase / FK506-binding protein (ROF1), identical to rotamase FKBP (ROF1) GB:U49453 (Arabidopsis thaliana) (Mol. Gen. Genet. 252 (5), 510-517 (1996))	1.0441	5.6042	3.32415	15.7686
CATMA1a20630	AT1G21560	AT1G21560.1	expressed protein, similar to hypothetical protein [Arabidopsis thaliana] (TAIR:At4g01170.1); similar to unknown protein [Oryza sativa (japonica cultivar-group)] (GB:AAV24769.1)	3.30855	3.81558	3.56206	15.7633
CATMA4a27420	AT4G25730	AT4G25730.1	FtsJ-like methyltransferase family protein, contains Pfam profile: PF01728 FtsJ-like methyltransferase	1.184	2.2026	1.6933	15.6225
CATMA4a26645	AT4G24960	AT4G24960.1	ABA-responsive protein (HVA22d), identical to AtHVA22d (Arabidopsis thaliana) GI:4884938	1.28331	2.55847	1.92089	15.564
CATMA4a34080	AT4G32350	AT4G32350.1	expressed protein, contains Pfam profile: PF03398 eukaryotic protein of unknown function, DUF292	1.60284	2.31827	1.96055	15.5627
CATMA1a63715	AT1G74310	AT1G74310.1	heat shock protein 101 (HSP101), identical to heat shock protein 101 GI:6715468 GB:AAF26423 from (Arabidopsis thaliana)	0.708633	6.51802	3.61333	15.5201
CATMA5a58460	AT5G62900	AT5G62900.1	expressed protein	3.97602	3.89175	3.93388	15.5103
CATMA5a24285	AT5G26860	AT5G26860.1	similar to Lon protease, putative [Arabidopsis thaliana] (TAIR:At3g05790.1); similar to Lon protease, putative [Arabidopsis thaliana] (TAIR:At3g05780.1); similar to LON2 [Zea mays] (GB:AAC50021.1); similar to Lon protease, putative [Phytophthora infe	1.32355	2.02345	1.6735	15.3648
CATMA5a09020	AT5G10280	AT5G10280.1	myb family transcription factor (MYB92), contains PFAM profile myb DNA binding domain PF00249; identical to cDNA putative transcription factor (MYB92) GI:3941523	0.907527	2.05637	1.48195	15.3391
CATMA4a11015	AT4G10920	AT4G10920.1	transcriptional coactivator p15 (PC4) family protein (KELP), similar to SP|P53999 Activated RNA polymerase II transcriptional coactivator p15 (PC4) (p14) {Homo sapiens}; contains Pfam profile PF02229: Transcriptional Coactivator p15 (PC4); supporting	1.61848	2.54648	2.08248	15.1388
CATMA3a17360	AT3G17860	AT3G17860.1	expressed protein	1.65491	2.16725	1.91108	15.0763
CATMA5a15080	AT5G16750	AT5G16750.1	transducin family protein / WD-40 repeat family protein, contains 8 WD-40 repeats (PF00400); similar to transducin homolog sazD - Homo sapiens, EMBL:U02609	1.02708	2.35254	1.68981	15.006
CATMA1a05760	AT1G06720	AT1G06720.1	expressed protein, contains Pfam domain, PF04950: Protein of unknown function (DUF663)	1.10747	2.87641	1.99194	14.9948
CATMA1a03430	AT1G04590	AT1G04590.1	expressed protein, isoform contains GG acceptor splice site at intron 7	1.63533	2.2183	1.92682	14.986
CATMA4a39320	AT4G37820	AT4G37820.1	expressed protein, Kaposi's sarcoma-associated herpes-like virus ORF73gene, Kaposi's sarcoma-associated herpesvirus, U52064	1.49571	3.04955	2.27263	14.9176
CATMA1a65265	AT1G76030	AT1G76030.1	vacuolar ATP synthase subunit B / V-ATPase B subunit / vacuolar proton pump B subunit / V-ATPase 57 kDa subunit, identical to SP|P11574 Vacuolar ATP synthase subunit B (EC 3.6.3.14) (V-ATPase B subunit) (Vacuolar proton pump B subunit) (V-ATPase 57 k	2.58163	2.32541	2.45352	14.7804
CATMA4a36370	AT4G34530	AT4G34530.1	basic helix-loop-helix (bHLH) family protein, contains Pfam profile: PF00010 helix-loop-helix DNA-binding domain	1.44294	2.16251	1.80272	14.7147
CATMA4a41420	AT4G40010	AT4G40010.1	serine/threonine protein kinase, putative, similar to serine-threonine protein kinase (Triticum aestivum) gi|2055374|gb|AAB58348	1.06571	3.82968	2.44769	14.7003
CATMA5a19590	AT5G21060	AT5G21060.1	homoserine dehydrogenase family protein, similar to aspartokinase-homoserine dehydrogenase (Glycine max) GI:2970447, GI:2970556; contains Pfam profile PF00742: Homoserine dehydrogenase	2.38923	2.02202	2.20563	14.5698
CATMA5a07730	AT5G08420	AT5G08420.1	expressed protein	1.12084	2.13563	1.62824	14.5077
CATMA4a31380	AT4G29750	AT4G29750.1	expressed protein, contains Pfam domain, PF04581: Protein of unknown function (DUF578)	1.0314	2.14503	1.58822	14.4462
CATMA3a22710	AT3G22750	AT3G22750.1	protein kinase, putative, similar to protein kinase ATMRK1 (Arabidopsis thaliana) gi|2351097|dbj|BAA22079	1.3293	2.28039	1.80485	14.3861
CATMA4a15273	AT4G14790	AT4G14790.1	ATP-dependent RNA helicase, mitochondrial (SUV3), identical to mitochondrial RNA helicase (Arabidopsis thaliana) GI:5823579; contains Pfam profile PF00271: Helicase conserved C-terminal domain	1.21265	2.07786	1.64525	14.2933
CATMA5a62970	AT5G67520	AT5G67520.1	adenylylsulfate kinase, putative, similar to adenylylsulfate kinase, chloroplast precursor (APS kinase, Adenosine-5'phosphosulfate kinase, ATP adenosine-5'- phosphosulfate 3'-phosphotransferase) (Catharanthus roseus) SWISS-PROT:O49204	0.921317	2.02948	1.4754	14.2888
CATMA1a19070	AT1G20070	AT1G20070.1	expressed protein	1.39023	2.38127	1.88575	14.1868
CATMA2a38720	AT2G40430	AT2G40430.1	expressed protein, identical to Protein At2g40430 (Swiss-Prot:O22892) (Arabidopsis thaliana); similar to Glioma tumor suppressor candidate region gene 2 protein (p60) (Swiss-Prot:Q9NZM5) (Homo sapiens)	1.07472	2.84815	1.96144	14.0243
CATMA2a02030	AT2G03120	AT2G03120.1	signal peptide peptidase family protein, contains Pfam domain PF04258: Membrane protein of unknown function (DUF435)	2.60318	2.09132	2.34725	14.0004
CATMA3a41910	AT3G48930	AT3G48930.1	40S ribosomal protein S11 (RPS11A)	2.49727	2.06419	2.28073	13.9462
CATMA2a01120	NA	CATMA2a01120	NA	1.29908	2.28726	1.79317	13.8807
CATMA5a58890	AT5G63320	AT5G63320.1	similar to DNA-binding bromodomain-containing protein [Arabidopsis thaliana] (TAIR:At3g27260.1); similar to kinase-like protein [Oryza sativa] (GB:BAB41205.1)	1.51652	2.29915	1.90784	13.8536
CATMA5a24111	AT5G26680	AT5G26680.1	endonuclease, putative, similar to Swiss-Prot:P39748 FLAP endonuclease-1 (Maturation factor 1) (MF1) (Homo sapiens)	1.20806	2.14686	1.67746	13.8177
CATMA5a20100	AT5G22630	AT5G22630.1	prephenate dehydratase family protein, contains Pfam profile PF00800: prephenate dehydratase	0.994139	2.09117	1.54265	13.7513
CATMA3a15420	AT3G16000	AT3G16000.1	matrix-localized MAR DNA-binding protein-related, similar to matrix-localized MAR DNA binding protein MFP1 GI:1771158 from (Lycopersicon esculentum)	1.33181	2.9336	2.1327	13.7477
CATMA3a07810	AT3G08970	AT3G08970.1	DNAJ heat shock N-terminal domain-containing protein, low similarity to PIR|A47079|A47079 heat shock protein dnaJ - Lactococcus lactis; contains Pfam profile PF00226 DnaJ domain	1.16608	5.48973	3.3279	13.6904
CATMA5a12805	AT5G14580	AT5G14580.1	polyribonucleotide nucleotidyltransferase, putative, similar to Swiss-Prot:P05055 polyribonucleotide nucleotidyltransferase (EC 2.7.7.8) (Polynucleotide phosphorylase) (PNPase) (Escherichia coli)	1.34917	2.08267	1.71592	13.6681
CATMA1a09930	AT1G11060	AT1G11060.1	expressed protein	1.89768	2.26744	2.08256	13.6034
CATMA2a45720	AT2G47250	AT2G47250.1	RNA helicase, putative, similar to SP|P53131 Pre-mRNA splicing factor RNA helicase PRP43 (Helicase JA1) {Saccharomyces cerevisiae}; contains Pfam profiles PF04408: Helicase associated domain (HA2), PF00271: Helicase conserved C-terminal domain	2.81874	2.21905	2.51889	13.5968
CATMA3a44820	AT3G51910	AT-HSFA7A	member of Heat Stress Transcription Factor (Hsf) family	1.30583	3.00459	2.15521	13.5571
CATMA1a12010	AT1G13030	AT1G13030.1	sphere organelles protein-related, contains weak similarity to Swiss-Prot:Q09003 sphere organelles protein SPH-1 (Sphere protein 1) (Xenopus laevis)	1.57325	2.92031	2.24678	13.4752
CATMA5a24265	AT5G26830	AT5G26830.1	threonyl-tRNA synthetase / threonine--tRNA ligase (THRRS), identical to SP|O04630 Threonyl-tRNA synthetase, mitochondrial precursor (EC 6.1.1.3) (Threonine--tRNA ligase) (ThrRS) {Arabidopsis thaliana}	1.98265	2.13158	2.05712	13.4274
CATMA5a60010	AT5G64580	AT5G64580.1	AAA-type ATPase family protein, similar to zinc dependent protease (Arabidopsis thaliana) GI:7650138; contains Pfam profile PF00004: ATPase AAA family	1.37159	2.13013	1.75086	13.4213
CATMA5a41340	AT5G45400	AT5G45400.1	replication protein, putative, similar to replication protein A 70kDa (Oryza sativa (japonica cultivar-group)) GI:13536993; contains InterPro entry IPR004365: OB-fold nucleic acid binding domain, PF04057: Replication factor-A protein 1, N-terminal do	0.885007	2.83729	1.86115	13.4098
CATMA5a39790	AT5G44020	AT5G44020.1	acid phosphatase class B family protein, similar to SP|P15490 STEM 28 kDa glycoprotein precursor (Vegetative storage protein A) {Glycine max}, acid phosphatase (Glycine max) GI:3341443; contains Pfam profile PF03767: HAD superfamily (subfamily IIIB)	0.664622	2.65927	1.66195	13.2783
CATMA2a22820	AT2G24490	AT2G24490.1	Encodes a component of Replication Protein A. Component of transcriptional gene silencing which does not affect endogenous small RNA accumulation nor DNA methylation. Localized in the nucleus. Involved in DNA repair. Interacts physically with ROS1.	1.43889	2.03262	1.73576	13.2065
CATMA2a24900	AT2G26590	AT2G26590.1	adhesion regulating molecule family, similar to oocyte membrane protein (GI:6174842) (Xenopus laevis); similar to Adhesion regulating molecule 1 precursor (110 kDa cell membrane glycoprotein) (Gp110) (Swiss-Prot:Q16186) (Homo sapiens); contains Pfam	2.05066	2.08791	2.06928	13.18
CATMA3a22130	AT3G22200	AT3G22200.1	4-aminobutyrate aminotransferase / gamma-amino-N-butyrate transaminase / GABA transaminase / beta-alanine--oxoglutarate aminotransferase, identical to gamma-aminobutyrate transaminase subunit precursor (Arabidopsis thaliana) (EC 2.6.1.19) GI:14030435	4.69296	2.61402	3.65349	13.0807
CATMA1a69100	AT1G79920	AT1G79920.1	heat shock protein 70, putative / HSP70, putative, contains Pfam profile: PF00012 Heat shock hsp70 proteins; similar to heat-shock proteins GB:CAA94389, GB:AAD55461 (Arabidopsis thaliana)	1.70506	2.01121	1.85814	12.8545
CATMA3a14610	AT3G15240	AT3G15240.1	expressed protein, similar to expressed protein [Arabidopsis thaliana] (TAIR:At5g53900.2); similar to unknown protein [Oryza sativa (japonica cultivar-group)] (GB:BAD37771.1)	1.71884	2.04781	1.88333	12.7557
CATMA2a46010	AT2G47550	AT2G47550.1	pectinesterase family protein, contains Pfam profile: PF01095 pectinesterase	1.9086	3.02077	2.46469	12.7424
CATMA1a00930	AT1G01940	AT1G01940.1	peptidyl-prolyl cis-trans isomerase cyclophilin-type family protein, contains Pfam domain, PF00160: peptidyl-prolyl cis-trans isomerase, cyclophilin-type	1.3844	2.31781	1.8511	12.6431
CATMA1a67670	AT1G78610	AT1G78610.1	mechanosensitive ion channel domain-containing protein / MS ion channel domain-containing protein, contains Pfam profile PF00924: Mechanosensitive ion channel	1.78598	2.30384	2.04491	12.6326
CATMA1b46590	AT1G55490	AT1G55490.1	RuBisCO subunit binding-protein beta subunit, chloroplast / 60 kDa chaperonin beta subunit / CPN-60 beta, identical to SWISS-PROT:P21240- RuBisCO subunit binding-protein beta subunit, chloroplast precursor (60 kDa chaperonin beta subunit, CPN-60 beta	2.68853	2.38931	2.53892	12.558
CATMA1a28330	AT1G30290	AT1G30290.1	pentatricopeptide (PPR) repeat-containing protein, contains Pfam profile PF01535: PPR repeat	1.07871	2.12304	1.60088	12.3661
CATMA4a00540	AT4G00480	AT4G00480.1	myc-related transcription factor (MYC1), identical to ATMYC1 GI:1853965 from (Arabidopsis thaliana)	1.88275	2.01556	1.94916	12.263
CATMA1a24700	AT1G26470	AT1G26470.1	expressed protein	1.47288	2.05789	1.76539	12.259
CATMA4a18150	AT4G17120	AT4G17120.1	expressed protein	1.8529	2.76961	2.31125	12.2217
CATMA4a13260	AT4G13160	AT4G13160.1	expressed protein, contains Pfam profile PF04576: Protein of unknown function, DUF593	1.51268	2.71128	2.11198	12.1304
CATMA2a37680	AT2G39420	AT2G39420.1	esterase/lipase/thioesterase family protein, similar to monoglyceride lipase from (Homo sapiens) GI:14594904, (Mus musculus) GI:2632162; contains Interpro entry IPR000379	1.92315	2.34228	2.13271	12.0926
CATMA4a18570	AT4G17550	AT4G17550.1	transporter-related, similar to cAMP inducible 2 protein (Mus musculus) GI:4580997, glycerol 3-phosphate permease (Homo sapiens) GI:7543982; contains Pfam profile PF00083: major facilitator superfamily protein	1.33111	2.01412	1.67262	12.0486
CATMA1a38040	AT1G45170	AT1G45170.1	expressed protein, similar to expressed protein [Arabidopsis thaliana] (TAIR:At5g42960.1); similar to expressed protein [Oryza sativa (japonica cultivar-group)] (GB:XP_470465.1)	2.08147	2.02151	2.05149	11.9423
CATMA1a08700	AT1G09850	AT1G09850.1	cysteine protease, papain-like (XBCP3), identical to papain-like cysteine peptidase XBCP3 GI:14600257 from (Arabidopsis thaliana); contains Pfam profiles PF00112: Papain family cysteine protease and PF00396: Granulin	2.56319	2.33924	2.45122	11.7163
CATMA2a06710	NA	CATMA2a06710	NA	1.56233	2.28112	1.92173	11.6472
CATMA4a09570	AT4G09560	AT4G09560.1	protease-associated zinc finger (C3HC4-type RING finger) family protein, contains Pfam domain, PF02225: protease-associated (PA) domain and Pfam domain, PF00097: Zinc finger, C3HC4 type (RING finger); similar to ReMembR-H2 protein JR702 (Arabidopsis	2.67389	2.70346	2.68867	11.6211
CATMA3a00955	AT3G01970	AT3G01970.1	WRKY family transcription factor, similar to WRKY1 GB:AAC49527 (Petroselinum crispum)	1.50604	2.33135	1.9187	11.5937
CATMA1a15040	AT1G16030	AT1G16030.1	heat shock protein 70, putative / HSP70, putative, similar to heat shock protein hsp70 GI:1771478 from (Pisum sativum)	0.908875	2.47072	1.6898	11.484
CATMA2a28070	AT2G29690	ASA2	anthranilate synthase - alpha subunit	1.42427	2.07402	1.74915	11.4412
CATMA1a44830	AT1G53760	AT1G53760.1	expressed protein	1.66921	3.05621	2.36271	11.3842
CATMA2a14720	AT2G15820	AT2G15820.1	pentatricopeptide (PPR) repeat-containing protein, contains Pfam profiles PF01535: PPR repeat, PF03161 LAGLIDADG DNA endonuclease family	1.10936	2.2324	1.67088	11.3132
CATMA2a34270	AT2G36070	AT2G36070.1	mitochondrial import inner membrane translocase subunit TIM44, putative, contains similarity to Swiss-Prot:O35857 import inner membrane translocase subunit TIM44, mitochondrial precursor (Mus musculus); contains Pfam domian PF04280: Mitochondrial imp	1.14394	2.09328	1.61861	11.2378
CATMA5a43540	AT5G47570	AT5G47570.1	expressed protein	3.98574	3.16289	3.57431	11.2036
CATMA3a41735	AT3G48750	AT3G48750.1	A-type cyclin-dependent kinase. Together with its specific inhibitor, the Kip-related protein, KRP2 they regulate the mitosis-to-endocycle transition during leaf development.	3.20564	3.10064	3.15314	11.1696
CATMA4a00780	AT4G00710	AT4G00710.1	protein kinase family protein, low similarity to protein kinase (Arabidopsis thaliana) GI:2852449; contains Pfam profile: PF00069 Protein kinase domain	4.17253	3.09915	3.63584	11.1326
CATMA2a29620	AT2G31380	AT2G31380.1	zinc finger (B-box type) family protein / salt tolerance-like protein (STH), contains Pfam profile PF00643: B-box zinc finger; identical to cDNA B-box zinc finger protein STH GI:12698721, SP|Q9SID1 Salt tolerance-like protein (Arabidopsis thaliana)	2.34296	2.05647	2.19971	11.0644
CATMA2a30720	AT2G32430	AT2G32430.1	galactosyltransferase family protein, contains Pfam profile: PF01762 galactosyltransferase	2.27836	2.45341	2.36589	10.9618
CATMA3a13620	AT3G14340	AT3G14340.1	expressed protein	2.82359	2.05655	2.44007	10.9243
CATMA2a16920	AT2G18250	AT2G18250.1	cytidylyltransferase domain-containing protein, similar to CoA synthase (Mus musculus) GI:21780289, bifunctional phosphopantetheine adenylyl transferase / dephospho CoA kinase (Sus scrofa) GI:20465246; contains Pfam profile PF01467: Cytidylyltransfer	2.57498	2.19335	2.38416	10.8676
CATMA5a07720	AT5G08415	AT5G08415.1	lipoic acid synthase family protein, similar to lipoic acid synthase from Arabidopsis thaliana (gi:3928758), from Mus musculus (gi:14669826) Pfam profile PF04055: radical SAM domain protein	2.77695	2.07419	2.42557	10.7922
CATMA2a25170	AT2G26830	AT2G26830.1	choline/ethanolamine kinase family protein, similar to SP|Q9HBU6 Ethanolamine kinase (EC 2.7.1.82) (EKI){Homo sapiens}, GmCK3p (Glycine max) GI:1438883; contains Pfam profile PF01633: Choline/ethanolamine kinase	2.07713	2.12358	2.10035	10.7384
CATMA2a34330	AT2G36130	AT2G36130.1	peptidyl-prolyl cis-trans isomerase, putative / cyclophilin, putative / rotamase, putative, contains Pfam domain, PF00160: peptidyl-prolyl cis-trans isomerase, cyclophilin-type	2.12535	2.06823	2.09679	10.7133
CATMA5a08580	AT5G09770	AT5G09770.1	ribosomal protein L17 family protein, contains Pfam profile: PF01196 ribosomal protein L17	3.92949	2.09063	3.01006	10.5956
CATMA5a08730	AT5G09980	AT5G09980.1	expressed protein	1.74203	2.08468	1.91336	10.4938
CATMA1a61350	AT1G72130	AT1G72130.1	proton-dependent oligopeptide transport (POT) family protein, contains Pfam profile: PF00854 POT family	1.33891	2.01365	1.67628	10.4201
CATMA5a55220	AT5G59480	AT5G59480.1	haloacid dehalogenase-like hydrolase family protein, low similarity to SP|P53078 SSM1 protein {Saccharomyces cerevisiae}; contains InterPro accession IPR005834: Haloacid dehalogenase-like hydrolase	2.58278	3.54431	3.06355	10.2644
CATMA2a25350	AT2G26990	AT2G26990.1	COP9 signalosome complex subunit 2 / CSN complex subunit 2 (CSN2), proteasome, COP9-complex and eIF3-domain protein; identical to CSN complex subunit 2 (Arabidopsis thaliana) GI:18056655; identical to cDNA CSN complex subunit 2 (CSN2) GI:18056654	1.67552	2.06325	1.86939	10.2636
CATMA2a25320	AT2G26970	AT2G26970.1	exonuclease family protein, contains exonuclease domain, Pfam:PF00929	1.85886	2.23379	2.04632	10.2519
CATMA4a38575	AT4G36990	AT4G36990.1	heat shock factor protein 4 (HSF4) / heat shock transcription factor 4 (HSTF4), identical to heat shock transcription factor 4 (HSF4) SP:Q96320 from (Arabidopsis thaliana)	0.848706	2.00081	1.42476	10.2404
CATMA2a37135	AT2G38880	AT2G38880.1	histone-like transcription factor (CBF/NF-Y) family protein, similar to CAAT-box DNA binding protein subunit B (NF-YB) (SP:P25209) (GI:22380) (Zea mays) and CCAAT-binding transcription factor subunit A (CBF-A) (NF-Y protein chain B) (NF-YB) (CAAT-bo	2.71621	2.61183	2.66402	10.1401
CATMA5a48515	AT5G52640	AT5G52640.1	heat shock protein 81-1 (HSP81-1) / heat shock protein 83 (HSP83), nearly identical to SP|P27323 Heat shock protein 81-1 (HSP81-1) (Heat shock protein 83) {Arabidopsis thaliana}; contains Pfam profiles PF02518: ATPase, histidine kinase-, DNA gyrase B	1.65645	5.56385	3.61015	10.1031
CATMA1a61410	AT1G72180	AT1G72180.1	leucine-rich repeat transmembrane protein kinase, putative, similar to GI:3641252 from (Malus x domestica) (Plant Mol. Biol. 40 (6), 945-957 (1999))	2.77133	2.12714	2.44924	10.0947
CATMA2a16010	AT2G17280	AT2G17280.1	phosphoglycerate/bisphosphoglycerate mutase family protein, contains Pfam profile PF00300: phosphoglycerate mutase family	5.28372	4.82949	5.05661	9.95034
CATMA2a14580	AT2G15690	AT2G15690.1	pentatricopeptide (PPR) repeat-containing protein, contains Pfam profile PF01535: PPR repeat	1.1633	2.1904	1.67685	9.93775
CATMA4a23160	AT4G21530	AT4G21530.1	transducin family protein / WD-40 repeat family protein, contains 1 WD-40 repeat (PF00400); similar to anaphase-promoting complex subunit 4 GI:6180011 (Homo sapiens); supported by EST GB:AU237382	1.3733	2.31831	1.84581	9.76092
CATMA2a36430	AT2G38130	AT2G38130.1	GCN5-related N-acetyltransferase, putative, similar to SP|Q03503 L-A virus GAG protein N-acetyltransferase (EC 2.3.1.-) {Saccharomyces cerevisiae}; contains Pfam profile PF00583: acetyltransferase, GNAT family	1.59039	2.22031	1.90535	9.63845
CATMA5a32570	AT5G37260	AT5G37260.1	myb family transcription factor, contains Pfam profile: PF00249 myb-like DNA-binding domain	1.00201	2.10131	1.55166	9.58035
CATMA5a21230	AT5G23750	AT5G23750.1	remorin family protein, contains Pfam domain, PF03766: Remorin, N-terminal region; contains Pfam domain, PF03763: Remorin, C-terminal region	1.67434	2.0142	1.84427	9.38348
CATMA5a62300	AT5G66870	ASL1	Encodes LOB domain protein whose overexpression results in KNOX gene repression. Overexpression also results in plants with hyponastic leaves, downward pointing flowers and reduced apical dominance. May be involved in the transcriptional regulation	2.2196	3.00256	2.61108	9.26897
CATMA1a32220	AT1G33990	AT1G33990.1	hydrolase, alpha/beta fold family protein, similar to polyneuridine aldehyde esterase GI:6651393 from (Rauvolfia serpentina), SP|Q40708 PIR7A protein {Oryza sativa}, ethylene-induced esterase (Citrus sinensis) GI:14279437; contains Pfam profile PF005	2.07811	2.34868	2.2134	9.23121
CATMA5a56490	AT5G60760	AT5G60760.1	2-phosphoglycerate kinase-related, contains weak similarity to 2-phosphoglycerate kinase (GI:467751) (Methanothermus fervidus)	1.59366	2.01204	1.80285	9.14913
CATMA1a59570	AT1G70290	AT1G70290.1	trehalose-6-phosphate synthase, putative, similar to Alpha,alpha-trehalose-phosphate synthase (UDP-forming) (EC 2.4.1.15) (Trehalose-6-phosphate synthase) from {Kluyveromyces lactis} SP|Q07158, {Saccharomyces cerevisiae} SP|Q00764; contains Pfam prof	4.5963	2.18897	3.39263	9.09085
CATMA5a24630	AT5G27270	AT5G27270.1	pentatricopeptide (PPR) repeat-containing protein, contains Pfam profile PF01535: PPR repeat	1.36584	2.2124	1.78912	9.08142
CATMA1a30110	AT1G31850	AT1G31850.1	dehydration-responsive protein, putative, strong similarity to early-responsive to dehydration stress ERD3 protein (Arabidopsis thaliana) GI:15320410; contains Pfam profile PF03141: Putative methyltransferase	1.07847	11.1301	6.10427	8.82943
CATMA4a15410	AT4G14950	AT4G14950.1	expressed protein	2.39974	2.20052	2.30013	8.80342
CATMA1a30390	AT1G32050	AT1G32050.1	secretory carrier membrane protein (SCAMP) family protein, contains Pfam domain, PF04144: SCAMP family	2.33836	2.24857	2.29347	8.79432
CATMA1a37860	AT1G44910	AT1G44910.1	similar to FF domain-containing protein / WW domain-containing protein [Arabidopsis thaliana] (TAIR:At3g19670.1); similar to formin binding protein 3-like [Oryza sativa (japonica cultivar-group)] (GB:BAD87484.1); contains InterPro domain FF domain (I	1.71314	2.36775	2.04045	8.73582
CATMA3a39230	AT3G46220	AT3G46220.1	expressed protein	0.543104	4.44699	2.49505	8.34571
CATMA3a43870	AT3G50860	AT3G50860.1	clathrin adaptor complex small chain family protein, contains Pfam profile: PF01217 clathrin adaptor complex small chain	1.77043	2.15831	1.96437	8.25406
CATMA1a42690	AT1G51560	AT1G51560.1	expressed protein	1.53658	3.26197	2.39927	8.04548
CATMA2a25450	AT2G27090	AT2G27090.1	expressed protein, contains Pfam domains, PF04782: Protein of unknown function (DUF632) and PF04783: Protein of unknown function (DUF630)	1.46008	2.16192	1.811	8.0178
CATMA1a01765	AT1G02840	AT1G02840.1	pre-mRNA splicing factor SF2 (SF2) / SR1 protein, identical to SP|O22315 Pre-mRNA splicing factor SF2 (SR1 protein) {Arabidopsis thaliana}	2.10943	2.0514	2.08041	8.01214
CATMA5a21225	AT5G23740	AT5G23740.1	40S ribosomal protein S11 (RPS11C)	3.54542	2.92186	3.23364	7.77503
CATMA2a30380	AT2G32120	AT2G32120.1	heat shock protein 70 family protein / HSP70 family protein, similar to SP|P22953 Heat shock cognate 70 kDa protein 1 (Hsc70.1) {Arabidopsis thaliana}; contains InterPro accession IPR001023: Heat shock protein Hsp70	0.60956	2.36383	1.48669	7.65796
CATMA3a14380	AT3G15030	AT3G15030.1	TCP family transcription factor, putative, similar to TCP3 GB:AAC24010 (Arabidopsis thaliana)	1.53836	2.25579	1.89707	7.63804
CATMA2b15865	AT2G17120	AT2G17120.1	peptidoglycan-binding LysM domain-containing protein, contains Pfam profile PF01476: LysM domain; supporting cDNA gi|16226688|gb|AF428464.1|AF428464	2.56406	2.03006	2.29706	7.61258
CATMA1a06860	AT1G07830	AT1G07830.1	ribosomal protein L29 family protein, similar to GB:CAA83057 from (Saccharomyces cerevisiae)	2.62683	2.23872	2.43278	7.46467
CATMA1a54200	AT1G64890	AT1G64890.1	integral membrane transporter family protein, contains 11 transmembrane domains; contains Pfam PF03092: BT1 family; contains TIGRFAMS TIGR00788: folate/biopterin transporter	1.50773	2.60712	2.05743	7.42648
CATMA1a06470	AT1G07400	AT1G07400.1	17.8 kDa class I heat shock protein (HSP17.8-CI), similar to 17.5 kDa class I heat shock protein SP:P04793 from (Glycine max); contains Pfam PF00011: Hsp20/alpha crystallin family	0.860927	5.37154	3.11624	7.42506
CATMA5a39420	AT5G43600	AT5G43600.1	N-carbamyl-L-amino acid hydrolase, putative, similar to N-carbamoyl-L-amino acid hydrolase (Bacillus stearothermophilus) SWISS-PROT:Q53389	2.68229	2.30615	2.49422	7.41227
CATMA5a55930	AT5G60170	AT5G60170.1	RNA recognition motif (RRM)-containing protein, low similarity to transcriptional repressor Not4-Np (Homo sapiens) GI:6856207; contains INTERPRO:IPR000504 RNA-binding region RNP-1 (RNA recognition motif)	1.50118	2.0225	1.76184	7.39512
CATMA3a11080	AT3G12140	AT3G12140.1	emsy N terminus domain-containing protein / ENT domain-containing protein, contains Pfam profile PF03735: ENT domain	1.84554	2.09939	1.97247	7.29608
CATMA3a35130	AT3G42860	AT3G42860.1	zinc knuckle (CCHC-type) family protein, contains Pfam domain, PF00098: Zinc knuckle	1.8016	2.59898	2.20029	7.27086
CATMA5a46830	AT5G50890	AT5G50890.1	expressed protein	1.38151	2.08053	1.73102	7.25847
CATMA1a45900	AT1G54830	AT1G54830.1	CCAAT-box binding transcription factor Hap5a, putative, similar to heme activated protein GI:6289057 from (Arabidopsis thaliana) GI:14577940 CCAAT-binding protein subunit HAP5 {Hypocrea jecorina} similar to Transcription factor GB:CAA74053 GI:2398533	1.40401	2.11169	1.75785	7.05275
CATMA3b04930	AT3G05900	AT3G05900.1	neurofilament protein-related, similar to NF-180 (GI:632549) (Petromyzon marinus) similar to Neurofilament triplet H protein (200 kDa neurofilament protein) (Neurofilament heavy polypeptide) (NF-H) (Swiss-Prot:P12036) (Homo sapiens)	0.955328	3.35737	2.15635	6.86807
CATMA5a43640	AT5G47660	AT5G47660.1	DNA-binding protein-related, similar to GTL1 (Arabidopsis thaliana) GI:2664198	3.17404	2.3243	2.74917	6.6538
CATMA5a55970	AT5G60210	AT5G60210.1	cytoplasmic linker protein-related, contains weak similarity to cytoplasmic linker protein CLIP-170 (GI:2905649) (Gallus gallus)	1.38143	2.30974	1.84558	6.50493
CATMA1a08650	AT1G09810	AT1G09810.1	expressed protein, contains Pfam profile PF04146: YT521-B-like family	2.6023	2.21946	2.41088	6.2066
CATMA3a19050	AT3G19460	AT3G19460.1	reticulon family protein (RTNLB11), weak similarity to neuroendocrine-specific protein C (Homo sapiens) GI:307311; identical to cDNA RTNLB11 GI:32331878	2.16735	2.37504	2.27119	5.82827
CATMA3a36550	NA	CATMA3a36550	NA	1.73626	2.09195	1.9141	5.71266
CATMA1b52130	AT1G62970	AT1G62970.1	DNAJ heat shock N-terminal domain-containing protein, low similarity to AHM1 (Triticum aestivum) GI:6691467; contains Pfam profile PF00226: DnaJ domain	2.12749	2.83317	2.48033	5.28541
CATMA1a08560	AT1G09700	AT1G09700.1	double-stranded RNA-binding domain (DsRBD)-containing protein, contains Pfam profile PF00035: Double-stranded RNA binding motif; supporting cDNA gi|12247456|gb|AF276440.1|AF276440	1.25188	2.02502	1.63845	5.13266
CATMA1a58340	AT1G68940	AT1G68940.1	armadillo/beta-catenin repeat protein-related / U-box domain-containing protein, ; contains Pfam profile PF04564: U-box domain	2.52425	2.88093	2.70259	4.91007
CATMA2a26360	AT2G27970	AT2G27970.1	cyclin-dependent kinase, putative / CDK, putative, similar to Cks1 protein (Arabidopsis thaliana) gi|2274859|emb|CAA03859	1.77614	2.12012	1.94813	4.69473
CATMA1a63360	AT1G74010	AT1G74010.1	strictosidine synthase family protein, similar to strictosidine synthase (Rauvolfia serpentina)(SP|P15324); contains strictosidine synthase domain PF03088	2.08249	2.08047	2.08148	4.63086
CATMA4a02465	AT4G02195	AT4G02195.1	syntaxin 42 (SYP42) / TLG2b, identical to SP|Q9SWH4 Syntaxin 42 (AtSYP42) (AtTLG2b) {Arabidopsis thaliana}	2.97153	3.14343	3.05748	4.5959
CATMA3a29590	AT3G29390	AT3G29390.1	hydroxyproline-rich glycoprotein family protein, sequencing discrepancy between cDNA and genomic sequence prevents representation of entire coding sequence	2.11353	2.10594	2.10974	4.13497
CATMA5a59910	AT5G64480	AT5G64480.1	expressed protein	2.57777	2.91395	2.74586	3.92291
CATMA1a57830	AT1G68450	AT1G68450.1	VQ motif-containing protein, contains PF05678: VQ motif	3.71423	4.04609	3.88016	3.88371
CATMA1a57520	AT1G68150	AT1G68150.1	WRKY family transcription factor, similar to DNA-binding protein ABF2 GI:1159879 from (Avena fatua)	1.2995	2.29391	1.7967	2.65942
CATMA2a42450	AT2G44010	AT2G44010.1	expressed protein	1.50681	2.27572	1.89126	2.62588

## Sheet: (D) BA120 down
CATMA ID	AGI	genename	description	Mean Ratio BA15 vs. BA0	Mean Ratio BA120 vs. BA0	Mean Ratio BAx vs. BA0	Meta Statistics
CATMA5a43410	AT5G47450	AT5G47450.1	major intrinsic family protein / MIP family protein, contains Pfam profile: MIP PF00230	1.11661	0.277978	0.697295	115.09
CATMA3a00185	AT3G01190	AT3G01190.1	peroxidase 27 (PER27) (P27) (PRXR7), identical to SP|Q43735 Peroxidase 27 precursor (EC 1.11.1.7) (Atperox P27) (PRXR7) (ATP12a) {Arabidopsis thaliana}	0.822546	0.274331	0.548438	106.714
CATMA5a43205	AT5G47220	AT5G47220.1	Encodes a member of the ERF (ethylene response factor) subfamily B-3 of ERF/AP2 transcription factor family (ATERF-2). The protein contains one AP2 domain. Functions as activator of GCC boxûdependent transcription. Positive regulator of JA-responsive	0.843433	0.248515	0.545974	85.7571
CATMA5a43220	AT5G47240	AT5G47240.1	MutT/nudix family protein, similar to SP|P53370 Nucleoside diphosphate-linked moiety X motif 6 {Homo sapiens}; contains Pfam profile PF00293: NUDIX domain	1.1089	0.471005	0.789952	80.4656
CATMA1a64720	AT1G75380	AT1G75380.1	wound-responsive protein-related, similar to wound inducive gene GI:8096273 from (Nicotiana tabacum)	0.812615	0.435451	0.624033	72.5833
CATMA3a16130	AT3G16720	AT3G16720.1	zinc finger (C3HC4-type RING finger) family protein, contains Pfam domain, PF00097: Zinc finger, C3HC4 type (RING finger)	1.2993	0.399705	0.849503	70.9959
CATMA5a08270	AT5G09440	AT5G09440.1	phosphate-responsive protein, putative, similar to phi-1 (phosphate-induced gene) (Nicotiana tabacum) GI:3759184; contains Pfam profile PF04674: Phosphate-induced protein 1 conserved region	0.987933	0.476647	0.73229	70.5736
CATMA2a39370	AT2G41010	AT2G41010.1	VQ motif-containing protein, contains PF05678: VQ motif	1.39879	0.353325	0.876059	69.9221
CATMA5a05530	AT5G06320	AT5G06320.1	harpin-induced family protein / HIN1 family protein / harpin-responsive family protein / NDR1/HIN1-like protein 3, similar to harpin-induced protein hin1 (GI:1619321)(Nicotiana tabacum)	0.902336	0.376504	0.63942	69.7404
CATMA4a33440	AT4G31800	AT4G31800.1	WRKY family transcription factor	1.43931	0.416567	0.927937	67.3459
CATMA1a17615	AT1G18570	AT1G18570.1	myb family transcription factor (MYB51), contains PFAM profile: PF00249	1.83408	0.456471	1.14527	66.6025
CATMA2a34420	AT2G36220	AT2G36220.1	expressed protein	1.04763	0.34355	0.695589	66.0882
CATMA4a11410	AT4G11280	ACS6	encodes a a member of the 1-aminocyclopropane-1-carboxylate (ACC) synthase (S-adenosyl-L-methionine methylthioadenosine-lyase, EC 4.4.1.14) gene family	1.77924	0.374057	1.07665	65.6482
CATMA3a19200	AT3G19580	AT3G19580.1	zinc finger (C2H2 type) protein 2 (AZF2), identical to Cys2/His2-type zinc finger protein 2 (Arabidopsis thaliana) gi|6009885|dbj|BAA85107	1.28853	0.357965	0.823246	63.4926
CATMA1a16990	AT1G17990	AT1G17990.1	12-oxophytodienoate reductase, putative, similar to OPR1 (GI:3882355) and OPR2 (GI:3882356)	1.15296	0.427424	0.790193	61.999
CATMA5a53400	AT5G57685	AT5G57685.1	expressed protein	0.774922	0.453873	0.614398	61.1664
CATMA1a59200	AT1G69890	AT1G69890.1	expressed protein, contains Pfam profile: PF04601 protein of unknown function (DUF569	1.16679	0.371681	0.769237	61.0406
CATMA5a09320	AT5G10580	AT5G10580.1	expressed protein, contains Pfam profile PF04654: Protein of unknown function, DUF599	0.927691	0.432821	0.680256	61.0384
CATMA5a08890	AT5G10130	AT5G10130.1	pollen Ole e 1 allergen and extensin family protein, contains similarity to pollen specific protein C13 precursor (Zea mays) SWISS-PROT:P33050	1.18953	0.300502	0.745018	59.057
CATMA3a36740	AT3G43850	AT3G43850.1	expressed protein, similar to MTD1 (Medicago truncatula) GI:9294810	0.771457	0.332203	0.55183	58.0916
CATMA1a26550	AT1G28370	AT1G28370.1	encodes a member of the ERF (ethylene response factor) subfamily B-1 of ERF/AP2 transcription factor family. The protein contains one AP2 domain. There are 15 members in this subfamily including ATERF-3, ATERF-4, ATERF-7, and leafy petiole.	6.34203	0.387259	3.36464	58.0305
CATMA5a15610	AT5G17350	AT5G17350.1	expressed protein	2.07134	0.478855	1.2751	57.3113
CATMA4a28860	AT4G27280	AT4G27280.1	calcium-binding EF hand family protein, similar to EF-hand Ca2+-binding protein CCD1 (Triticum aestivum) GI:9255753; contains INTERPRO:IPR002048 calcium-binding EF-hand domain	1.75061	0.332138	1.04137	56.8019
CATMA3a15560	AT3G16150	AT3G16150.1	L-asparaginase, putative / L-asparagine amidohydrolase, putative, similar to Swiss-Prot:P30364 L-asparaginase (EC 3.5.1.1) (L-asparagine amidohydrolase) (Lupinus angustifolius)	0.722291	0.423821	0.573056	56.3852
CATMA5a51870	AT5G56100	AT5G56100.1	glycine-rich protein / oleosin, contains Pfam PF01277: Oleosin domain	0.742546	0.448127	0.595337	55.9402
CATMA1a21010	AT1G21910	AT1G21910.1	encodes a member of the DREB subfamily A-5 of ERF/AP2 transcription factor family. The protein contains one AP2 domain. There are 15 members in this subfamily including RAP2.1, RAP2.9 and RAP2.10.	1.52002	0.42229	0.971153	54.9594
CATMA2a16550	AT2G17880	AT2G17880.1	DNAJ heat shock protein, putative, similar to J11 protein (Arabidopsis thaliana) GI:9843641; contains Pfam profile PF00226 DnaJ domain	0.732617	0.327902	0.530259	54.0379
CATMA1a65800	AT1G76600	AT1G76600.1	expressed protein	1.17558	0.359988	0.767786	53.5836
CATMA1a30510	AT1G32170	AT1G32170.1	xyloglucan:xyloglucosyl transferase, putative / xyloglucan endotransglycosylase, putative / endo-xyloglucan transferase, putative (XTR4), identical to N-terminal partial sequence of xyloglucan endotransglycosylase-related protein XTR4 GI:1244754 from	0.978892	0.493723	0.736308	53.5832
CATMA4a29880	AT4G28220	AT4G28220.1	NADH dehydrogenase-related, similar to 64 kDa mitochondrial NADH dehydrogenase (Neurospora crassa) GI:4753821, alternative NADH-dehydrogenase (Yarrowia lipolytica) GI:3718005; contains Pfam profile PF00070: Pyridine nucleotide-disulphide oxidoreducta	0.60477	0.498701	0.551736	53.5717
CATMA3a45730	AT3G52800	AT3G52800.1	zinc finger (AN1-like) family protein, contains Pfam domain, PF01428: AN1-like Zinc finger	0.953853	0.499117	0.726485	51.9836
CATMA1a17020	AT1G17990	AT1G17990.1	12-oxophytodienoate reductase, putative, similar to OPR1 (GI:3882355) and OPR2 (GI:3882356)	0.9939	0.382876	0.688388	51.8848
CATMA2a16390	AT2G17710	AT2G17710.1	expressed protein	0.928536	0.400325	0.66443	50.9735
CATMA4a14375	AT4G14130	AT4G14130.1	xyloglucan:xyloglucosyl transferase, putative / xyloglucan endotransglycosylase, putative / endo-xyloglucan transferase, putative (XTR7), almost identical to xyloglucan endotransglycosylase-related protein XTR7 GI:1244760 from (Arabidopsis thaliana),	0.88794	0.405036	0.646488	50.9236
CATMA1a24060	AT1G25400	AT1G25400.1	expressed protein, similar to unknown protein GI:6714347 from (Arabidopsis thaliana)	0.843829	0.367831	0.60583	50.4497
CATMA4a31410	AT4G29780	AT4G29780.1	expressed protein	6.0375	0.464889	3.25119	50.3812
CATMA2a42950	AT2G44500	AT2G44500.1	expressed protein, contains Pfam PF03138: Plant protein family. The function of this family of plant proteins is unknown; previously annotated as 'axi 1 protein from Nicotiana tabacum -related' based on similarity to axi 1 protein (GB:X80301) (GI:55	1.10549	0.404568	0.755031	49.8007
CATMA5a43215	AT5G47230	AT5G47230.1	encodes a member of the ERF (ethylene response factor) subfamily B-3 of ERF/AP2 transcription factor family (ATERF-5). The protein contains one AP2 domain. There are 18 members in this subfamily including ATERF-1, ATERF-2, AND ATERF-5.	2.15091	0.356228	1.25357	49.2108
CATMA4a14230	AT4G14020	AT4G14020.1	rapid alkalinization factor (RALF) family protein	0.842849	0.41821	0.63053	48.942
CATMA4a03876	AT4G03510	AT4G03510.1	zinc finger (C3HC4-type RING finger) family protein (RMA1), identical to RING zinc finger protein RMA1 gi:3164222	0.721578	0.389631	0.555604	48.5231
CATMA4a18370	AT4G17340	AT4G17340.1	major intrinsic family protein / MIP family protein, contains Pfam profile: MIP PF00230	1.22673	0.476347	0.85154	48.4538
CATMA5a47120	AT5G51190	AT5G51190.1	encodes a member of the ERF (ethylene response factor) subfamily B-3 of ERF/AP2 transcription factor family. The protein contains one AP2 domain. There are 18 members in this subfamily including ATERF-1, ATERF-2, AND ATERF-5.	15.4544	0.386867	7.92064	48.3531
CATMA4a29910	AT4G28270	AT4G28270.1	zinc finger (C3HC4-type RING finger) family protein, contains Pfam profile: PF00097 zinc finger, C3HC4 type (RING finger)	0.76705	0.451521	0.609286	47.6915
CATMA2a40020	AT2G41640	AT2G41640.1	expressed protein, contains Pfam domain, PF04577: Protein of unknown function (DUF563)	1.81384	0.333401	1.07362	47.4692
CATMA2a37060	AT2G38790	AT2G38790.1	expressed protein	1.26045	0.404166	0.83231	47.2129
CATMA1a06190	AT1G07135	AT1G07135.1	glycine-rich protein	2.00366	0.382143	1.1929	46.4633
CATMA3a43300	AT3G50260	AT3G50260.1	encodes a member of the DREB subfamily A-5 of ERF/AP2 transcription factor family. The protein contains one AP2 domain. There are 16 members in this subfamily including RAP2.1, RAP2.9 and RAP2.10.	1.45747	0.41323	0.935349	45.6095
CATMA5a57200	AT5G61600	AT5G61600.1	encodes a member of the ERF (ethylene response factor) subfamily B-3 of ERF/AP2 transcription factor family. The protein contains one AP2 domain. There are 18 members in this subfamily including ATERF-1, ATERF-2, AND ATERF-5.	1.51491	0.364873	0.939891	45.3195
CATMA2a38220	AT2G40000	AT2G40000.1	expressed protein	0.946762	0.441801	0.694282	45.0071
CATMA2a00260	AT2G01180	AT2G01180.1	phosphatidic acid phosphatase family protein / PAP2 family protein, similar to phosphatidic acid phosphatase 2a2 (Cavia porcellus) GI:3641336; contains Pfam profile PF01569 PAP2 superfamily	1.25068	0.470658	0.860668	44.3525
CATMA2b33400	AT2G35270	AT2G35270.1	DNA-binding protein-related, contains Pfam domain PF03479: Domain of unknown function (DUF296), found in AT-hook motifs Pfam:PF02178	0.651332	0.33437	0.492851	44.0708
CATMA3a14565	AT3G15210	AT3G15210.1	Encodes a member of the ERF (ethylene response factor) subfamily B-1 of ERF/AP2 transcription factor family (ATERF-4). The protein contains one AP2 domain. Acts as a negative regulator of JA-responsive defense gene expression and resistance to the n	1.32039	0.408116	0.864255	44.0688
CATMA5a00240	AT5G01210	AT5G01210.1	transferase family protein, contains Pfam profile PF02458 transferase family	1.20536	0.485362	0.845363	43.4339
CATMA3a14910	AT3G15500	AT3G15500.1	no apical meristem (NAM) family protein (NAC3), identical to AtNAC3 (Arabidopsis thaliana) GI:12060424; contains Pfam PF02365: No apical meristem (NAM) domain; similar to jasmonic acid 2 GB:AAF04915 from (Lycopersicon esculentum)	0.718213	0.452965	0.585589	43.1834
CATMA2a26520	AT2G28120	AT2G28120.1	nodulin family protein, similar to nodulin-like protein (Arabidopsis thaliana) GI:3329368, nodule-specific protein Nlj70 (Lotus japonicus) GI:3329366	0.789303	0.479829	0.634566	42.893
CATMA1a00170	AT1G01180	AT1G01180.1	expressed protein	0.632574	0.430242	0.531408	42.6864
CATMA1a55440	AT1G66180	AT1G66180.1	aspartyl protease family protein, contains Pfam PF00026: Eukaryotic aspartyl protease profile; similar to CND41, chloroplast nucleoid DNA binding protein (GI:2541876) (Nicotiana tabacum)	0.837959	0.416516	0.627238	42.4657
CATMA2a33420	AT2G35290	AT2G35290.1	expressed protein	0.825001	0.38459	0.604796	41.8446
CATMA3a54340	AT3G61190	AT3G61190.1	BON1-associated protein 1 (BAP1), identical to BON1-associated protein 1 (Arabidopsis thaliana) GI:15487384; contains Pfam profile PF00168: C2 domain; supporting cDNA gi|15487383|gb|AY045765.1|	1.36469	0.406785	0.885738	41.1209
CATMA1a66420	AT1G77210	AT1G77210.1	sugar transporter, putative, similar to monosaccharide transporter PaMst-1 (Picea abies) GI:2258137, sugar carrier protein GI:169735 from (Ricinus communis), glucose transporter (Saccharum hybrid cultivar H65-7052) GI:347855; contains Pfam profile PF	0.625389	0.417346	0.521367	40.8686
CATMA4a35810	AT4G33985	AT4G33985.1	expressed protein	0.904063	0.409541	0.656802	40.7046
CATMA4a33530	AT4G31875	AT4G31875.1	expressed protein	0.67829	0.418132	0.548211	40.2486
CATMA3a09980	AT3G10930	AT3G10930.1	expressed protein	2.41855	0.481278	1.44991	39.5451
CATMA2a27045	AT2G28630	AT2G28630.1	beta-ketoacyl-CoA synthase family protein	0.607918	0.386253	0.497086	38.2441
CATMA3a10360	AT3G11340	AT3G11340.1	UDP-glucoronosyl/UDP-glucosyl transferase family protein, contains Pfam profile: PF00201 UDP-glucoronosyl and UDP-glucosyl transferase	1.19088	0.348687	0.769782	37.0878
CATMA4a02370	AT4G02090	AT4G02090.1	expressed protein	0.681538	0.439759	0.560648	36.6903
CATMA2a23510	AT2G25200	AT2G25200.1	expressed protein	0.558795	0.48775	0.523273	36.0792
CATMA1a67380	AT1G78270	AT1G78270.1	UDP-glucose glucosyltransferase, putative, similar to UDP-glucose glucosyltransferase GI:3928543 from (Arabidopsis thaliana)	1.26613	0.487082	0.876607	35.574
CATMA1a69620	AT1G80440	AT1G80440.1	kelch repeat-containing F-box family protein, similar to SP|Q9ER30 Kelch-related protein 1 (Sarcosin) {Rattus norvegicus}; contains Pfam profiles PF01344: Kelch motif, PF00646: F-box domain	0.71945	0.374689	0.547069	34.1826
CATMA5a16560	AT5G18290	AT5G18290.1	major intrinsic protein-related / MIP-related, contains weak similarity to Pfam profile: MIP PF00230; annotated based on segmental duplication	0.747311	0.329648	0.53848	34.1797
CATMA5a62040	AT5G66650	AT5G66650.1	expressed protein, contains Pfam domain, PF04678: Protein of unknown function, DUF607	1.56852	0.428961	0.998739	34.1395
CATMA2a26250	AT2G27830	AT2G27830.1	expressed protein	1.09723	0.47121	0.78422	33.5618
CATMA1a60940	AT1G71740	AT1G71740.1	expressed protein	0.889933	0.476435	0.683184	33.0373
CATMA1a25900	AT1G27670	AT1G27670.1	expressed protein	0.707908	0.389339	0.548623	32.8778
CATMA3a39680	AT3G46600	AT3G46600.1	scarecrow transcription factor family protein, scarecrow-like 11 - Arabidopsis thaliana, EMBL:AF036307	0.961969	0.42715	0.694559	32.8692
CATMA5a04290	AT5G05090	AT5G05090.1	myb family transcription factor, contains Pfam profile: PF00249 myb-like DNA-binding domain	1.28251	0.497515	0.890015	31.6844
CATMA4a18523	AT4G17490	AT4G17490.1	encodes a member of the ERF (ethylene response factor) subfamily B-3 of ERF/AP2 transcription factor family (ATERF-6). The protein contains one AP2 domain. There are 18 members in this subfamily including ATERF-1, ATERF-2, AND ATERF-5.	2.91287	0.463001	1.68794	31.5694
CATMA3a01510	AT3G02550	AT3G02550.1	LOB domain protein 41 / lateral organ boundaries domain protein 41 (LBD41), identical to LOB DOMAIN 41 (Arabidopsis thaliana) GI:17227172	0.783953	0.424035	0.603994	31.2473
CATMA4a41030	AT4G39675	AT4G39675.1	expressed protein	1.24205	0.418686	0.830369	31.0716
CATMA3a43350	AT3G50310	AT3G50310.1	protein kinase-related, contains eukaryotic protein kinase domain, INTERPRO:IPR000719	1.16632	0.450974	0.808646	30.2285
CATMA4a18526	AT4G17500	AT4G17500.1	encodes a member of the ERF (ethylene response factor) subfamily B-3 of ERF/AP2 transcription factor family (ATERF-1). The protein contains one AP2 domain. There are 18 members in this subfamily including ATERF-1, ATERF-2, AND ATERF-5.	1.2759	0.408475	0.842185	30.204
CATMA4a05710	AT4G05070	AT4G05070.1	expressed protein	0.604917	0.476727	0.540822	29.9957
CATMA2a25800	AT2G27390	AT2G27390.1	proline-rich family protein, contains proline-rich extensin domains, INTERPRO:IPR002965	0.732306	0.358879	0.545593	29.6116
CATMA5a53325	AT5G57620	AT5G57620.1	myb family transcription factor (MYB36), contains PFAM profile: myb DNA binding domain PF00249	0.759407	0.473067	0.616237	29.0058
CATMA1a69430	AT1G80240	AT1G80240.1	expressed protein, contains Pfam profile PF04862: Protein of unknown function, DUF642	0.837789	0.325432	0.58161	28.9505
CATMA1a66768	AT1G77640	AT1G77640.1	encodes a member of the DREB subfamily A-5 of ERF/AP2 transcription factor family. The protein contains one AP2 domain. There are 15 members in this subfamily including RAP2.1, RAP2.9 and RAP2.10.	1.84553	0.479429	1.16248	28.4045
CATMA1a07465	AT1G08500	AT1G08500.1	plastocyanin-like domain-containing protein	1.05305	0.472264	0.762658	27.8236
CATMA2a30410	AT2G32150	AT2G32150.1	haloacid dehalogenase-like hydrolase family protein, contains InterPro accession IPR005834: Haloacid dehalogenase-like hydrolase	0.772027	0.465254	0.61864	27.5031
CATMA3a12940	AT3G13760	AT3G13760.1	DC1 domain-containing protein, contains Pfam profile PF03107: DC1 domain	0.655724	0.359437	0.507581	27.4769
CATMA5a58760	AT5G63160	AT5G63160.1	speckle-type POZ protein-related, contains Pfam PF00651 : BTB/POZ domain; contains Pfam PF02135 : TAZ zinc finger; similar to Speckle-type POZ protein (SP:O43791) (Homo sapiens)	1.23969	0.362224	0.800956	27.1753
CATMA4a34200	AT4G32460	AT4G32460.1	expressed protein, contains Pfam profile PF04862: Protein of unknown function, DUF642	0.933358	0.488845	0.711101	27.1713
CATMA2a36250	AT2G37950	AT2G37950.1	zinc finger (C3HC4-type RING finger) family protein, contains Pfam profile PF00097: Zinc finger, C3HC4 type (RING finger); contains PROSITE PS00190: Cytochrome c family heme-binding site signature	1.00287	0.402543	0.702706	26.2509
CATMA3a41500	AT3G48520	AT3G48520.1	cytochrome P450 family protein, similar to Cytochrome P450 94A1 (P450-dependent fatty acid omega-hydroxylase) (SP:O81117) {Vicia sativa}; contains Pfam profile: PF00067 cytochrome P450	1.28918	0.465668	0.877423	26.1012
CATMA1a62840	AT1G73540	AT1G73540.1	MutT/nudix family protein, low similarity to SP|Q09790 Diadenosine 5',5'''-P1,P6-hexaphosphate hydrolase (EC 3.6.1.-) (Ap6A hydrolase) {Schizosaccharomyces pombe}; contains Pfam profile PF00293: NUDIX domain	1.2792	0.377801	0.828502	25.4272
CATMA1a47250	AT1G56150	AT1G56150.1	auxin-responsive family protein, similar to SP:P33082 Auxin-induced protein X15. (Soybean) {Glycine max}	0.912232	0.491469	0.70185	24.9315
CATMA5a54470	AT5G58750	AT5G58750.1	wound-responsive protein-related, similar to induced upon wounding stress (Arabidopsis thaliana) GI:1483218	0.656872	0.465882	0.561377	23.8885
CATMA5a15770	AT5G17490	AT5G17490.1	gibberellin response modulator, putative / gibberellin-responsive modulator, putative, putative member of the VHIID domain transcription factor family RGAL - Arabidopsis thaliana, EMBL:AJ224957	0.550106	0.494598	0.522352	23.4225
CATMA2a28650	AT2G30360	AT2G30360.1	CBL-interacting protein kinase 11 (CIPK11), identical to CBL-interacting protein kinase 11 (Arabidopsis thaliana) gi|13249121|gb|AAK16686; contains Pfam profiles PF00069: Protein kinase domain and PF03822: NAF domain; identical to cDNA CBL-interactin	0.752652	0.426827	0.58974	22.8109
CATMA4a19790	AT4G18670	AT4G18670.1	leucine-rich repeat family protein / extensin family protein, similar to extensin-like protein (Lycopersicon esculentum) gi|5917664|gb|AAD55979; contains leucine-rich repeats, Pfam:PF00560; contains proline rich extensin domains, INTERPRO:IPR002965	0.655964	0.497437	0.5767	22.6549
CATMA5a50340	AT5G54490	AT5G54490.1	calcium-binding EF-hand protein, putative, similar to EF-hand Ca2+-binding protein CCD1 (Triticum aestivum) GI:9255753; contains INTERPRO:IPR002048 calcium-binding EF-hand domain	2.88337	0.467437	1.6754	22.1378
CATMA1a45950	AT1G54890	AT1G54890.1	late embryogenesis abundant protein-related / LEA protein-related, similar to late embryogenesis abundant protein (EMB7) GI:1350543 from (Picea glauca)	1.04892	0.483302	0.766109	22.1045
CATMA5a16400	AT5G18130	AT5G18130.1	expressed protein, similar to unknown protein (gb|AAF00631.1)	0.744996	0.450634	0.597815	21.6434
CATMA2a34120	AT2G35930	AT2G35930.1	U-box domain-containing protein, similar to immediate-early fungal elicitor protein CMPG1 (Petroselinum crispum) GI:14582200; contains Pfam profile PF04564: U-box domain	1.28807	0.398097	0.843083	18.9234
CATMA3a07860	AT3G09020	AT3G09020.1	alpha 1,4-glycosyltransferase family protein / glycosyltransferase sugar-binding DXD motif-containing protein, low similarity to alpha-1,4-N-acetylglucosaminyltransferase, Homo sapiens (gi:5726306), Gb3 synthase, Rattus norvegicus (gi:9082162) ; cont	1.09704	0.452958	0.775001	18.9221
CATMA1a19340	AT1G20350	AT1G20350.1	mitochondrial import inner membrane translocase subunit Tim17, putative, similar to SP|Q9SP35 Mitochondrial import inner membrane translocase subunit TIM17 {Arabidopsis thaliana}; contains Pfam profile PF02466: Mitochondrial import inner membrane tra	0.665175	0.440708	0.552942	18.4891
CATMA1a22120	AT1G23050	AT1G23050.1	hydroxyproline-rich glycoprotein family protein, contains proline-rich extensin domains, INTERPRO:IPR002965	1.03591	0.478914	0.757412	18.4504
CATMA1a53300	AT1G64065	AT1G64065.1	expressed protein	1.56945	0.443291	1.00637	18.3484
CATMA5a58720	AT5G63130	AT5G63130.1	octicosapeptide/Phox/Bem1p (PB1) domain-containing protein, contains Pfam profile PF00564: PB1 domain	0.766807	0.467758	0.617282	18.2092
CATMA4a31885	AT4G30270	AT4G30270.1	MERI-5 protein (MERI-5) (MERI5B) / endo-xyloglucan transferase / xyloglucan endo-1,4-beta-D-glucanase (SEN4), identical to endo-xyloglucan transferase gi:944810, SP|P24806 MERI-5 protein precursor (Endo-xyloglucan transferase) (Xyloglucan endo-1,4-be	0.664162	0.430268	0.547215	17.9974
CATMA2a37800	AT2G39530	AT2G39530.1	integral membrane protein, putative, contains 3 transmembrane domains; contains Pfam PF04535 : Domain of unknown function (DUF588); similar to putative ethylene responsive element binding protein (GI:22135858) (Arabidopsis thaliana)	0.835083	0.486809	0.660946	17.8482
CATMA5a35160	AT5G39580	AT5G39580.1	peroxidase, putative, identical to peroxidase ATP24a (Arabidopsis thaliana) gi|1890313|emb|CAA72484	1.0044	0.496902	0.750652	17.2009
CATMA5a11290	AT5G13080	AT5G13080.1	WRKY family transcription factor, WRKY DNA binding protein - Solanum tuberosum, EMBL:AJ278507	1.20801	0.473958	0.840986	17.1211
CATMA1a14960	AT1G15900	AT1G15900.1	expressed protein	0.716311	0.463105	0.589708	16.4801
CATMA2a24880	AT2G26560	AT2G26560.1	patatin, putative, similar to patatin-like latex allergen (Hevea brasiliensis)(PMID:10589016); contains patatin domain PF01734	2.53185	0.305586	1.41872	16.4635
CATMA3a50790	AT3G57760	AT3G57760.1	protein kinase family protein, contains similarity to protein kinases	1.40728	0.495156	0.951217	15.7806
CATMA5a20440	AT5G22940	AT5G22940.1	Homolog of FRA8 (AT2G28110), a member of a member of glycosyltransferase family 47; exhibits high sequence similarity to tobacco (Nicotiana plumbaginifolia) pectin glucuronyltransferase.	0.545846	0.405903	0.475874	15.2814
CATMA1a31370	AT1G33055	AT1G33055.1	expressed protein	0.706246	0.488381	0.597313	15.1144
CATMA5a40430	AT5G44610	AT5G44610.1	DREPP plasma membrane polypeptide-related, contains Pfam profile: PF05558 DREPP plasma membrane polypeptide	0.728054	0.471267	0.59966	13.416
CATMA1a01400	AT1G02400	AT1G02400.1	Encodes a gibberellin 2-oxidase.	0.855848	0.485551	0.6707	11.7219
CATMA3a48810	AT3G55840	AT3G55840.1	expressed protein	1.14783	0.454211	0.801021	10.8504
CATMA5a07420	AT5G08141	AT5G08141.1	bZIP transcription factor family protein, contains Pfam profile: PF00170 bZIP transcription factor	0.601138	0.494869	0.548004	10.7258
CATMA3b40280	AT3G47200	AT3G47200.1	expressed protein, contains Pfam profile PF03140: Plant protein of unknown function	0.631281	0.394062	0.512672	10.2514
CATMA3a22530	AT3G22540	AT3G22540.1	expressed protein	0.556848	0.409227	0.483038	9.46659

## Sheet:  (E) BAx up
CATMA ID	AGI	genename	description	Mean Ratio BA15 vs. BA0	Mean Ratio BA120 vs. BA0	Mean Ratio BAx vs. BA0	Meta Statistics
CATMA5a58475	AT5G62920	ARR6	Encodes a Type-A response regulator that is responsive to cytokinin treatment. Its C-ter domain is very short in comparison to other Arabidopsis ARRs (17 total).	4.82586	3.08467	3.95527	129.822
CATMA5a05050	AT5G05860	AT5G05860.1	UDP-glucoronosyl/UDP-glucosyl transferase family protein, contains Pfam profile: PF00201 UDP-glucoronosyl and UDP-glucosyl transferase	1.34396	2.87006	2.10701	117.448	AT3G44326	0	0	0	0
CATMA3a37230	AT3G44326	CATMA3a37230	similar to F-box family protein [Arabidopsis thaliana] (TAIR:AT2G27310.1); similar to F-box protein-like [Oryza sativa (japonica cultivar-group)] (GB:BAD27806.1); contains InterPro domain Cyclin-like F-box; (InterPro:IPR001810)	2.44325	2.42383	2.43354	94.1119
CATMA3a29390	AT3G29250	AT3G29250.1	short-chain dehydrogenase/reductase (SDR) family protein, similar to 3-beta-hydroxysteroiddehydrogenase GI:15983819 from (Digitalis lanata); contains Pfam profile: PF00106 short chain dehydrogenase	1.25546	3.9032	2.57933	92.9755	AT1G19050	1	1	1	1
CATMA4a31370	AT4G29740	AT4G29740.1	FAD-binding domain-containing protein / cytokinin oxidase family protein, similar to cytokinin oxidase, Zea mays (gi:3882018) (gi:3441978)	7.59679	6.29332	6.94505	86.4106
CATMA1a18090	AT1G19050	ARR7	ARR7 mRNA for response regulator 7, complete cds	11.7229	8.94027	10.3316	85.0874
CATMA5a43950	AT5G47980	AT5G47980.1	transferase family protein, similar to alcohol acyltransferase (Fragaria x ananassa)(GI:10121328)(PMID:10810141), deacetylvindoline 4-O-acetyltransferase (Catharanthus roseus)(GI:4091808)(PMID:9681034)	2.00401	12.2898	7.1469	80.1774
CATMA5a43970	AT5G48000	AT5G48000.1	cytochrome P450 family protein, similar to steroid 22-alpha-hydroxylase; DWF4; CYP90B1 (GI:2935342) (Arabidopsis thaliana)	0.788227	3.96742	2.37782	77.8165	AT2G40670	1	1	1	1
CATMA1a57750	AT1G68360	AT1G68360.1	zinc finger protein-related, similar to zinc finger protein GI:790683 from (Arabidopsis thaliana)	3.01727	2.51279	2.76503	77.0101
CATMA5a17520	AT5G19110	AT5G19110.1	extracellular dermal glycoprotein-related / EDGP-related, similar to extracellular dermal glycoprotein EDGP precursor (Daucus carota) GI:285741	2.00714	4.48321	3.24518	76.8899
CATMA3a50000	AT3G57010	AT3G57010.1	strictosidine synthase family protein, similar to strictosidine synthase (Rauvolfia serpentina)(SP|P15324)	1.38371	4.40147	2.89259	75.8794	AT4G37410	0	1	0	1
CATMA2a38980	AT2G40670	ARR16	response regulator 16	2.39088	7.51023	4.95055	75.3572
CATMA1a12420	AT1G13420	AT1G13420.1	sulfotransferase family protein, similar to steroid sulfotransferase 1 GI:3420004 from (Brassica napus); contains Pfam profile PF00685: Sulfotransferase domain	1.08487	6.73854	3.9117	71.3061	AT2G01890	0	1	0	1
CATMA3a15410	AT3G15990	AT3G15990.1	sulfate transporter, putative, similar to sulfate transporter (Arabidopsis thaliana) GI:2285885; contains Pfam profiles PF00916: Sulfate transporter family, PF01740: STAS domain	1.91291	6.73393	4.32342	69.9154	AT1G17190	1	1	0	1
CATMA4a31320	AT4G29690	AT4G29690.1	type I phosphodiesterase/nucleotide pyrophosphatase family protein, similar to SP|P22413 Ectonucleotide pyrophosphatase/phosphodiesterase 1 (Plasma-cell membrane glycoprotein PC-1) (Includes: Alkaline phosphodiesterase I (EC 3.1.4.1); Nucleotide pyro	2.09631	6.76105	4.42868	67.1612
CATMA4a25570	AT4G23750	AT4G23750.1	encodes a member of the ERF (ethylene response factor) subfamily B-5 of ERF/AP2 transcription factor family. The protein contains one AP2 domain. There are 7 members in this subfamily.	2.00851	2.58176	2.29513	64.7217
CATMA5a56580	AT5G60890	AT5G60890.1	receptor-like protein kinase (ATR1) (MYB34), identical to receptor-like protein kinase(ATR1) GI:3150037 from (Arabidopsis thaliana); contains PFAM profile: myb DNA binding domain PF00249; identical to cDNA putative transcription factor (MYB34) mRNA,	1.82814	3.24196	2.53505	63.6363	AT1G50280	0	1	0	1
CATMA2a27835	AT2G29450	AT2G29450.1	glutathione S-transferase (103-1A), identical to Swiss-Prot:P46421 glutathione S-transferase 103-1A (Arabidopsis thaliana)	1.27635	5.15561	3.21598	63.2701	AT1G53060	0	1	0	1
CATMA5a38360	AT5G42590	AT5G42590.1	cytochrome P450 71A16, putative (CYP71A16), Identical to Cytochrome P450 71A16 (SP:Q9FH66) (Arabidopsis thaliana)	0.727786	3.89738	2.31258	60.6408	AT1G28100	1	1	0	1
CATMA1a26550	AT1G28370	AT1G28370.1	encodes a member of the ERF (ethylene response factor) subfamily B-1 of ERF/AP2 transcription factor family. The protein contains one AP2 domain. There are 15 members in this subfamily including ATERF-3, ATERF-4, ATERF-7, and leafy petiole.	6.34203	0.387259	3.36464	58.0305	AT3G58990	0	1	0	0
CATMA4a38980	AT4G37410	AT4G37410.1	cytochrome P450, putative, similar to cytochrome p450 SP:O65790 from (Arabidopsis thaliana)	2.6329	7.58404	5.10847	56.6227
CATMA5a22640	AT5G24920	AT5G24920.1	expressed protein, ; expression supported by MPSS	1.67295	2.33172	2.00234	54.5356	AT1G18800	0	1	0	1
CATMA1a50390	AT1G61340	AT1G61340.1	F-box family protein, contains Pfam PF00646: F-box domain; similar to late embryogenesis abundant protein GI:1350540 from (Picea glauca)	3.50571	0.740497	2.1231	53.6321	AT5G41590	0	0	0	1
CATMA4a31330	AT4G29700	AT4G29700.1	type I phosphodiesterase/nucleotide pyrophosphatase family protein, similar to SP|P22413 Ectonucleotide pyrophosphatase/phosphodiesterase 1 (Plasma-cell membrane glycoprotein PC-1) (Includes: Alkaline phosphodiesterase I (EC 3.1.4.1); Nucleotide pyro	2.26456	4.56368	3.41412	50.8423
CATMA1a61370	AT1G72140	AT1G72140.1	proton-dependent oligopeptide transport (POT) family protein, contains Pfam profile: PF00854 POT family	1.33902	3.08619	2.2126	50.4748	AT5G08640	0	1	0	1
CATMA4a31410	AT4G29780	AT4G29780.1	expressed protein	6.0375	0.464889	3.25119	50.3812	AT1G30070	0	1	0	1
CATMA3a29930	AT3G29670	AT3G29670.1	transferase family protein, similar to anthocyanin 5-aromatic acyltransferase from Gentiana triflora GI:4185599, malonyl CoA:anthocyanin 5-O-glucoside-6'''-O-malonyltransferase from Perilla frutescens GI:17980232, Salvia splendens GI:17980234; contai	1.46895	3.76534	2.61715	50.0185	AT2G33840	0	1	0	1
CATMA3a22775	AT3G22840	AT3G22840.1	chlorophyll A-B binding family protein / early light-induced protein (ELIP), identical to early light-induced protein; ELIP (Arabidopsis thaliana) GI:1872544; contains Pfam profile: PF00504 chlorophyll A-B binding protein; identical to cDNA early lig	1.08266	3.00894	2.0458	49.0282	AT5G13570	0	1	0	1
CATMA5a47120	AT5G51190	AT5G51190.1	encodes a member of the ERF (ethylene response factor) subfamily B-3 of ERF/AP2 transcription factor family. The protein contains one AP2 domain. There are 18 members in this subfamily including ATERF-1, ATERF-2, AND ATERF-5.	15.4544	0.386867	7.92064	48.3531	AT4G01010	0	1	0	1
CATMA5a36060	AT5G40390	AT5G40390.1	raffinose synthase family protein, similar to galactinol-raffinose galactosyltransferase (Vigna angularis) GI:6634701, seed imbibition protein GB:AAA32975 GI:167100 from (Hordeum vulgare); contains Pfam profile PF05691: Raffinose synthase or seed imb	1.58028	2.61939	2.09983	47.1338	AT5G45775	0	0	0	1
CATMA2a42060	AT2G43650	AT2G43650.1	Sas10/U3 ribonucleoprotein (Utp) family protein, contains Pfam profile PF04000: Sas10/Utp3 family; contains Prosite PS00761: Signal peptidases I signature 3; weak similarity to PEBP2 beta-binding protein / charged amino acid rich leucine zipper facto	1.56339	2.44957	2.00648	46.0873	AT5G19260	1	1	0	1
CATMA4a36430	AT4G34590	AT4G34590.1	bZIP transcription factor family protein, similar to common plant regulatory factor 7 GI:9650828 from (Petroselinum crispum)	1.78188	2.37757	2.07972	44.4235	AT2G31060	0	1	1	1
CATMA2b16180	AT2G17500	AT2G17500.1	auxin efflux carrier family protein, contains auxin efflux carrier domain, Pfam:PF03547	1.71844	4.56395	3.14119	44.2998	AT1G53920	0	1	0	1
CATMA2a37026	AT2G38750	ANNAT4	Annexins are a family of calcium dependent membrane binding proteins though to be involved in Golgi mediated secretion. This is one of four annexins identified in Arabidopsis.	1.3573	3.90171	2.62951	44.1405	AT1G53590	0	1	0	1
CATMA2a00940	AT2G01890	AT2G01890.1	purple acid phosphatase, putative, contains Pfam profile: PF00149 calcineurin-like phosphoesterase; identical to purple acid phosphatase (GI:20257479) (Arabidopsis thaliana);	2.11955	3.12	2.61978	44.0884
CATMA1a16200	AT1G17190	AT1G17190.1	glutathione S-transferase, putative, One of three repeated glutathione transferases. 65% identical to glutathione transferase (Arabidopsis thaliana) (gi|4006934). Location of est 141C5T7 (gb|T46669); supported by fl cDNA gi:14326476gb:AF385691.	2.49559	3.32668	2.91113	43.7904
CATMA5a38350	AT5G42580	AT5G42580.1	cytochrome P450 family protein, similar to Cytochrome P450 93A1 (SP:Q42798) {Glycine max}; similar to flavone synthase II (GI:5081817) (Gerbera hybrida).	1.31866	3.12433	2.2215	43.7691	AT2G29560	0	1	0	1
CATMA5a41290	AT5G45340	AT5G45340.1	cytochrome P450 family protein, similar to SP|Q42569|C901_ARATH Cytochrome P450 90A1 (SP:Q42569) (Arabidopsis thaliana); contains Pfam profile: PF00067: Cytochrome P450	3.09395	1.99637	2.54516	43.5986	AT4G34910	0	1	0	1
CATMA2a39655	AT2G41310	AT2G41310.1	two-component responsive regulator / response reactor 3 (RR3), identical to response reactor 3 GI:3273200 from (Arabidopsis thaliana); contains Pfam profile: PF00072 response regulator receiver domain	2.67557	4.49817	3.58687	42.9733
CATMA1a67240	AT1G78120	AT1G78120.1	tetratricopeptide repeat (TPR)-containing protein, low similarity to SP|Q99615 DnaJ homolog subfamily C member 7 (Tetratricopeptide repeat protein 2) {Homo sapiens}; contains Pfam profile PF00515: TPR Domain	1.96239	2.41507	2.18873	41.8132	AT1G21600	0	1	0	1
CATMA3a38015	AT3G44990	AT3G44990.1	xyloglucan:xyloglucosyl transferase, putative / xyloglucan endotransglycosylase, putative / endo-xyloglucan transferase, putative	0.985337	3.03588	2.01061	41.0398	AT4G11010	0	1	0	1
CATMA3a13460	AT3G14200	AT3G14200.1	DNAJ heat shock N-terminal domain-containing protein, low similarity to SP|O75190|DJB6_HUMAN DnaJ homolog subfamily B member 6 (Heat shock protein J2) {Homo sapiens}; contains Pfam profile PF00226 DnaJ domain	1.53178	2.69639	2.11409	39.8214	AT1G11670	0	1	0	1
CATMA4a25920	AT4G24190	AT4G24190.1	shepherd protein (SHD) / clavata formation protein, putative, nearly identical to SHEPHERD (Arabidopsis thaliana) GI:19570872; contains Pfam profiles PF02518: ATPase, histidine kinase-, DNA gyrase B-, and HSP90-like domain protein, PF00183: Hsp90 pro	2.07924	2.9148	2.49702	39.7752
CATMA1a41350	AT1G50280	AT1G50280.1	phototropic-responsive NPH3 family protein, contains NPH3 family domain, Pfam:PF03000	5.76435	9.10795	7.43615	39.6708
CATMA3a43340	AT3G50300	AT3G50300.1	transferase family protein, similar to anthranilate N-hydroxycinnamoyl/benzoyltransferase, Dianthus caryophyllus (gi:2239091); contains Pfam transferase family domain PF002458	1.50674	3.9807	2.74372	39.6327	AT1G62180	0	1	0	1
CATMA1a29550	AT1G31320	AT1G31320.1	LOB domain protein 4 / lateral organ boundaries domain protein 4 (LBD4), identical to SP|Q9SHE9 LOB domain protein 4 {Arabidopsis thaliana}	1.69587	3.05448	2.37517	39.3354	AT4G07410	0	1	0	1
CATMA4a24390	NA	CATMA4a24390	NA	1.91353	2.9588	2.43616	39.0479	AT2G45460	0	1	0	1
CATMA3a08210	AT3G09350	AT3G09350.1	armadillo/beta-catenin repeat family protein, contains Pfam profile: PF00514 armadillo/beta-catenin-like repeat	1.58426	3.48763	2.53594	36.1949	AT1G78570	0	1	0	1
CATMA5a47350	AT5G51440	AT5G51440.1	23.5 kDa mitochondrial small heat shock protein (HSP23.5-M), similar to heat shock 22 kDa protein, mitochondrial precursor SP:Q96331 from (Arabidopsis thaliana); identified in Scharf, K-D., et al,Cell Stress & Chaperones (2001) 6: 225-237.	1.63601	4.8473	3.24165	36.1356	AT5G22440	0	1	0	1
CATMA5a56630	AT5G60990	AT5G60990.1	DEAD/DEAH box helicase, putative (RH10), probable replication protein A1, Oryza sativa, EMBL:AF009179	1.88447	2.51008	2.19727	35.8828	AT1G18040	0	1	1	1
CATMA3a48950	AT3G55980	AT3G55980.1	zinc finger (CCCH-type) family protein, contains Pfam domain, PF00642: Zinc finger C-x8-C-x5-C-x3-H type (and similar) and Pfam domain, PF00023: Ankyrin repeat	6.77323	0.739578	3.75641	35.4124	AT1G61870	0	1	0	1
CATMA4a24300	AT4G22570	AT4G22570.1	adenine phosphoribosyltransferase, putative, strong similarity to Adenine phosphoribosyltransferase (Hordeum vulgare subsp. vulgare) GI:9711921; contains Pfam profile PF00156: Phosphoribosyl transferase domain	1.42152	3.24116	2.33134	35.1348	AT1G53750	0	1	0	1
CATMA5a46650	AT5G50600	AT5G50600.1	short-chain dehydrogenase/reductase (SDR) family protein, similar to sterol-binding dehydrogenase steroleosin GI:15824408 from (Sesamum indicum)	1.98225	4.20726	3.09476	34.6149	AT1G67810	0	1	0	1
CATMA5a24720	AT5G27330	AT5G27330.1	expressed protein	1.77902	2.60372	2.19137	34.5964	AT4G30480	0	1	0	1
CATMA1a44090	AT1G53060	AT1G53060.1	legume lectin family protein	2.11957	16.159	9.13929	34.5725
CATMA1a26300	AT1G28100	AT1G28100.1	expressed protein	2.82959	3.7957	3.31265	33.7212
CATMA2a37033	AT2G38760	ANNAT3	Annexins are calcium binding proteins that are localized in the cytoplasm. When cytosolic Ca2+ increases, they relocate to the plasma membrane.	1.66223	9.67231	5.66727	33.6065	AT1G04190	0	1	0	1
CATMA3a52020	AT3G58990	AT3G58990.1	aconitase C-terminal domain-containing protein, contains Pfam profile PF00694: Aconitase C-terminal domain	3.86195	2.2164	3.03918	32.9527
CATMA5a04010	AT5G04840	AT5G04840.1	bZIP protein	1.37723	3.08398	2.2306	32.9146	AT4G14700	0	0	0	1
CATMA5a61570	AT5G66210	AT5G66210.1	calcium-dependent protein kinase family protein / CDPK family protein, contains Pfam domains, PF00069: Protein kinase domain and PF00036: EF hand	2.71432	2.13358	2.42395	32.6154
CATMA1a17855	AT1G18800	AT1G18800.1	nucleosome assembly protein (NAP) family protein, similar to SP|Q01105|SET protein (HLA-DR associated protein II) (PHAPII) (Phosphatase 2A inhibitor I2PP2A) {Homo sapiens}; contains Pfam profile PF00956: Nucleosome assembly protein (NAP)	2.28197	2.54219	2.41208	32.4782
CATMA5a37190	AT5G41590	AT5G41590.1	expressed protein, contains Pfam profile PF04525: Protein of unknown function (DUF567)	2.1311	2.17566	2.15338	32.4012
CATMA1a54180	AT1G64880	AT1G64880.1	ribosomal protein S5 family protein, contains similarity to 30S ribosomal protein S5 GI:6969105 from (Campylobacter jejuni)	1.76683	3.15393	2.46038	31.9682	AT3G02530	0	1	0	1
CATMA3a18390	AT3G18773	AT3G18773.1	zinc finger (C3HC4-type RING finger) family protein, contains Pfam profile: PF00097 zinc finger, C3HC4 type (RING finger)	4.19872	4.19245	4.19559	31.5506
CATMA5a07985	AT5G08640	AT5G08640.1	flavonol synthase 1 (FLS1), identical to SP|Q96330; contains PF03171 2OG-Fe(II) oxygenase superfamily	3.80287	6.57239	5.18763	31.1484
CATMA1a28090	AT1G30070	AT1G30070.1	SGS domain-containing protein, similar to calcyclin binding protein (Mus musculus) GI:3142331; contains Pfam profile PF05002: SGS domain	2.09118	5.45872	3.77495	30.7503
CATMA4a39630	AT4G38100	AT4G38100.1	expressed protein	1.49747	3.30788	2.40268	30.3679	AT5G21060	0	1	0	1
CATMA1a03107	AT1G04250	AT1G04250.1	auxin-responsive protein / indoleacetic acid-induced protein 17 (IAA17), Identical to SP|P93830 Auxin-responsive protein IAA17 (Indoleacetic acid-induced protein 17) {Arabidopsis thaliana}; ESTs gb|H36782 and gb|F14074 come from this gene	1.60842	2.71571	2.16207	29.8264	AT2G03120	0	1	0	1
CATMA2a32040	AT2G33840	AT2G33840.1	tRNA synthetase class I (W and Y) family protein, similar to SP|P54577 Tyrosyl-tRNA synthetase (EC 6.1.1.1) (Tyrosyl--tRNA ligase) (TyrRS) {Homo sapiens}; contains Pfam profile PF00579: tRNA synthetases class I (W and Y)	2.91991	3.64413	3.28202	29.4269
CATMA3a56645	AT3G63440	AT3G63440.1	similar to FAD-binding domain-containing protein / cytokinin oxidase family protein [Arabidopsis thaliana] (TAIR:At2g41510.1); similar to putative cytokinin oxidase [Oryza sativa (japonica cultivar-group)] (GB:XP_463696.1); similar to putative cytoki	1.84026	2.37509	2.10768	29.3788	AT2G47250	0	1	0	1
CATMA5a56410	AT5G60670	AT5G60670.1	60S ribosomal protein L12 (RPL12C), 60S RIBOSOMAL PROTEIN L12 (like), Arabidopsis thaliana, PIR:T45883	1.95659	2.23707	2.09683	29.1921	AT2G26590	0	1	0	0
CATMA3a14430	AT3G15080	AT3G15080.1	exonuclease family protein, contains exonuclease domain, Pfam:PF00929	1.55785	2.6227	2.09027	28.7293	AT3G22200	0	1	1	1
CATMA5a11800	AT5G13570	AT5G13570.1	MutT/nudix family protein, similar to mRNA-decapping enzyme (Homo sapiens) GI:23268269; contains Pfam profile PF00293: NUDIX domain	4.51424	2.72236	3.6183	28.4397
CATMA3a22880	NA	CATMA3a22880	NA	1.44014	4.17743	2.80879	28.0263	AT1G45170	0	1	0	1
CATMA4a05770	AT5G08180	AT5G08180.1	ribosomal protein L7Ae/L30e/S12e/Gadd45 family protein, Similar to NHP2/L7Ae family proteins, see SWISSPROT:P32495 and PMID:2063628.	1.79486	2.66484	2.22985	27.8874	AT1G09850	0	1	0	1
CATMA4a01180	AT4G01010	AT4G01010.1	cyclic nucleotide-regulated ion channel, putative (CNGC13), similar to CaM-regulated potassium ion channel (ACBK1) GI:8515883 from (Arabidopsis thaliana)	5.34987	2.7887	4.06928	27.6662
CATMA4a05520	AT4G04940	AT4G04940.1	transducin family protein / WD-40 repeat family protein, contains seven G-protein beta WD-40 repeats	1.72813	2.85929	2.29371	27.4695	AT5G47570	0	1	0	1
CATMA2a16180	AT2G17500	AT2G17500.1	auxin efflux carrier family protein, contains auxin efflux carrier domain, Pfam:PF03547	1.68533	2.81618	2.25076	27.0383	AT3G48750	0	1	0	1
CATMA1a68260	AT1G79140	AT1G79140.1	expressed protein	1.52269	2.83207	2.17738	26.0538	AT4G00710	0	1	0	1
CATMA1a24000	AT1G25350	AT1G25350.1	glutamine-tRNA ligase, putative / glutaminyl-tRNA synthetase, putative / GlnRS, putative, similar to tRNA-glutamine synthetase GI:2995454 from (Lupinus luteus)	2.321	1.97706	2.14903	25.9457	AT2G31380	0	1	0	1
CATMA5a41760	AT5G45775	AT5G45775.1	60S ribosomal protein L11 (RPL11D)	2.32169	2.80471	2.5632	25.7913
CATMA4a19065	AT4G18040	AT4G18040.1	eukaryotic translation initiation factor 4E 1 / eIF-4E1 / mRNA cap-binding protein 1 (EIF4E1), identical to SP|O23252 Eukaryotic translation initiation factor 4E (eIF-4E) (eIF4E) (mRNA cap-binding protein) (eIF-4F 25 kDa subunit) (eIF-4F P26 subunit)	1.64712	2.57214	2.10963	25.7512	AT3G14340	0	1	0	1
CATMA5a17690	AT5G19260	AT5G19260.1	expressed protein, various predicted proteins	2.233	2.38957	2.31128	25.6481
CATMA1a32860	AT1G34550	AT1G34550.1	expressed protein, contains Pfam profile PF04765: Protein of unknown function (DUF616); expression supported by MPSS	1.9045	3.04023	2.47236	25.1375	AT5G08415	0	1	0	1
CATMA1a50960	AT1G61890	AT1G61890.1	MATE efflux family protein, similar to ripening regulated protein DDTFR18 (Lycopersicon esculentum) GI:12231296; contains Pfam profile PF01554: Uncharacterized membrane protein family	2.31572	1.82737	2.07155	24.6808	AT2G26830	0	1	0	0
CATMA5a22060	AT5G24460	AT5G24460.1	expressed protein	1.5054	3.01243	2.25891	24.5613	AT2G36130	0	1	0	1
CATMA2a29230	AT2G31060	AT2G31060.1	elongation factor family protein, contains Pfam profiles: PF00009 elongation factor Tu GTP binding domain, PF00679 elongation factor G C-terminus, PF03144 elongation factor Tu domain 2	2.37141	2.58363	2.47752	24.1137
CATMA5a59940	AT5G64510	AT5G64510.1	expressed protein	1.31287	5.76739	3.54013	24.0558	AT5G59480	0	1	0	1
CATMA1a45030	AT1G53920	AT1G53920.1	GDSL-motif lipase/hydrolase family protein, similar to Anther-specific proline-rich proteins SP|P40603 SP|P40602 from {Arabidopsis thaliana}; contains Pfam profile PF00657: GDSL-like Lipase/Acylhydrolase	2.11205	3.01263	2.56234	24.0368
CATMA1a44600	AT1G53590	AT1G53590.1	C2 domain-containing protein	2.45807	2.71373	2.5859	23.5089
CATMA1a15390	AT1G16400	AT1G16400.1	cytochrome P450 family protein, similar to gb|AF069494 cytochrome P450 from Sinapis alba and is a member of the PF|00067 Cytochrome P450 family; identical to cytochrome P450 CYP79F2 (CYP79F2) GI:10946207	2.47111	3.00397	2.73754	23.3722
CATMA1a47190	AT1G56110	AT1G56110.1	nucleolar protein Nop56, putative, similar to XNop56 protein (Xenopus laevis) GI:14799394; contains Pfam profile PF01798: Putative snoRNA binding domain	1.77768	2.28318	2.03043	23.315	AT5G66870	0	0	0	1
CATMA3a20250	AT3G20540	AT3G20540.1	DNA-directed DNA polymerase family protein, similar to PolI-like DNA polymerase (Oryza sativa) GI:19912795; contains Pfam profiles PF01612: 3'-5' exonuclease, PF00476: DNA polymerase I family A	1.38862	3.5773	2.48296	23.1686	AT1G33990	0	1	0	1
CATMA1a48800	AT1G59760	AT1G59760.1	ATP-dependent RNA helicase, putative, similar to SP|P47047 ATP-dependent RNA helicase DOB1 {Saccharomyces cerevisiae}, HUA enhancer 2 (Arabidopsis thaliana) GI:16024936; contains Pfam profiles PF00270: DEAD/DEAH box helicase, PF00271: Helicase conser	1.15598	3.12208	2.13903	23.0779	AT1G70290	0	1	0	1
CATMA3a03160	AT3G04210	AT3G04210.1	disease resistance protein (TIR-NBS class), putative, domain signature TIR-NBS exists, suggestive of a disease resistance protein.	6.4271	1.00103	3.71406	23.037	AT4G14950	0	1	0	1
CATMA1a67950	AT1G78850	AT1G78850.1	curculin-like (mannose-binding) lectin family protein, low similarity to ser/thr protein kinase from Zea mays (GI:2598067); contains Pfam lectin (probable mannose binding) domain PF01453 but not the protein kinase domain of the Z. mays protein	2.35444	2.11891	2.23667	22.4137
CATMA3a08080	AT3G09210	AT3G09210.1	KOW domain-containing transcription factor family protein, ; est match	1.79091	2.24368	2.0173	22.2367	AT1G02840	0	1	0	1
CATMA2a27920	AT2G29560	AT2G29560.1	enolase, putative, similar to enolase (Spinacia oleracea) gi|8919731|emb|CAB96173	2.20671	2.11457	2.16064	21.9995
CATMA3a48410	AT3G55450	AT3G55450.1	protein kinase, putative, similar to protein kinase APK1B (Arabidopsis thaliana) SWISS-PROT:P46573	2.33069	1.86012	2.09541	21.9643	AT2G17120	0	1	0	0
CATMA4a36700	AT4G34910	AT4G34910.1	DEAD/DEAH box helicase, putative (RH16), identical to cDNA DEAD box RNA helicase, RH16 GI:3776006	2.28169	3.18725	2.73447	21.8893
CATMA2a35160	AT2G36885	AT2G36885.1	expressed protein	2.26683	3.43365	2.85024	21.8625
CATMA1a20670	AT1G21600	AT1G21600.1	expressed protein, similar to hypothetical protein GB:AAD41412 GI:5263310 from (Arabidopsis thaliana)	2.40954	2.03715	2.22334	21.8622
CATMA4a11095	AT4G11010	AT4G11010.1	nucleoside diphosphate kinase 3, mitochondrial (NDK3), identical to Nucleoside diphosphate kinase III, mitochondrial precursor (NDK III) (NDP kinase III) (NDPK III) (SP:O49203) (Arabidopsis thaliana); contains Pfam PF00334 : Nucleoside diphosphate k	3.07665	2.03195	2.5543	21.7592
CATMA3a55770	AT3G62600	AT3G62600.1	DNAJ heat shock family protein, similar to DnaJ homolog subfamily B member 11 precursor (SP:Q99KV1){Mus musculus}; contains Pfam PF00226: DnaJ domain; contains PfaPF01556: DnaJ C terminal regionm	1.83205	2.50331	2.16768	21.5906	AT3G19460	0	1	0	1
CATMA1a10670	AT1G11670	AT1G11670.1	MATE efflux family protein, similar to ripening regulated protein DDTFR18 (Lycopersicon esculentum) GI:12231296; contains Pfam profile PF01554: Uncharacterized membrane protein family; EST gb|W43487 comes from this gene	3.36001	2.99451	3.17726	21.4634
CATMA2a36695	AT2G38400	AGT3	alanine:glyoxylate aminotransferase 2 homolog (AGT3) mRNA,	2.92722	2.37332	2.65027	21.3036
CATMA3a28630	AT3G28730	AT3G28730.1	structure-specific recognition protein 1 / high mobility group protein / HMG protein, nearly identical to SP|Q05153 Structure-specific recognition protein 1 homolog (HMG protein) {Arabidopsis thaliana}; contains Pfam profile PF00505: HMG (high mobili	2.98044	2.03014	2.50529	21.1232
CATMA3a23160	AT3G23170	AT3G23170.1	expressed protein	5.79382	1.88487	3.83934	20.9928	AT4G02195	0	1	0	1
CATMA1a51245	AT1G62180	AT1G62180.1	Encodes a protein disulfide isomerase-like (PDIL) protein, a member of a multigene family within the thioredoxin (TRX) superfamily. This protein also belongs to the adenosine 5'-phosphosulfate reductase-like (APRL) group.	2.81824	2.79463	2.80644	20.9764
CATMA1a67930	AT1G78830	AT1G78830.1	curculin-like (mannose-binding) lectin family protein, similar to S glycoprotein (Brassica rapa) GI:2351186; contains Pfam profile PF01453: Lectin (probable mannose binding)	3.0176	1.63093	2.32427	20.9712	AT5G64480	0	1	0	1
CATMA4a06600	AT4G07410	AT4G07410.1	transducin family protein / WD-40 repeat family protein, contains 7 WD-40 repeats (PF00400) (2 weak); similar to Vegetatible incompatibility protein HET-E-1 (SP:Q00808) {Podospora anserina}	2.10538	2.10184	2.10361	20.8848
CATMA5a52120	AT5G56320	AT5G56320.1	expansin, putative (EXP14), similar to alpha-expansin 3 GI:6942322 from (Triphysaria versicolor); alpha-expansin gene family, PMID:11641069	2.51115	1.53597	2.02356	20.8217	NA	0	0	0	1
CATMA4a27050	AT4G25340	AT4G25340.1	immunophilin-related / FKBP-type peptidyl-prolyl cis-trans isomerase-related, immunophilin FKBP46 - Spodoptera frugiperda (fall armyworm),PIR2:A55320	1.8006	3.25818	2.52939	20.5939			AT1G70900	0	1
CATMA1a14085	AT1G15100	AT1G15100.1	zinc finger (C3HC4-type RING finger) family protein, contains Pfam profile: PF00097 zinc finger, C3HC4 type (RING finger)	1.48345	2.98488	2.23416	20.5386			AT5G09300	0	1
CATMA2a43860	AT2G45460	AT2G45460.1	forkhead-associated domain-containing protein / FHA domain-containing protein	2.31656	2.66437	2.49046	20.4397
CATMA5a22580	AT5G24890	AT5G24890.1	expressed protein, weak similarity to MTD1 (Medicago truncatula) GI:9294810	2.51501	1.59712	2.05607	20.4113			AT4G30480	0	1
CATMA1a67640	AT1G78570	AT1G78570.1	NAD-dependent epimerase/dehydratase family protein, similar to dTDP-glucose 4,6-dehydratase from Aneurinibacillus thermoaerophilus GI:16357461, RmlB from Leptospira borgpetersenii GI:4234803; contains Pfam profile PF01370 NAD dependent epimerase/dehy	3.68664	2.91918	3.30291	20.3906
CATMA5a19900	AT5G22440	AT5G22440.1	60S ribosomal protein L10A (RPL10aC)	2.80812	2.28179	2.54495	20.1214
CATMA2a27880	AT2G29500	AT2G29500.1	17.6 kDa class I small heat shock protein (HSP17.6B-CI), contains Pfam PF00011: Hsp20/alpha crystallin family; identified in Scharf, K-D., et al, Cell Stress & Chaperones (2001) 6: 225-237.	1.44582	9.51201	5.47891	20.1108			AT1G27960	0	1
CATMA5a52620	AT5G56860	AT5G56860.1	zinc finger (GATA type) family protein, similar to unknown protein (pir |T04270)	1.82706	2.32877	2.07791	20.0529			AT2G27170	0	1
CATMA1b17040	AT1G18040	AT1G18040.1	cell division protein kinase, putative, similar to cell division protein kinase 7 (Homo sapiens) SWISS-PROT:P50613	2.23309	2.20984	2.22146	20.003
CATMA1a50950	AT1G61870	AT1G61870.1	pentatricopeptide (PPR) repeat-containing protein, contains Pfam profile PF01535: PPR repeat	3.2023	2.83124	3.01677	19.9047
CATMA1a58410	AT1G69040	ACR4	ACT-domain containing protein involved in feedback regulation of amino acid metabolism	1.80797	2.27666	2.04231	19.8998			AT4G30240	0	0
CATMA3a53290	AT3G60260	AT3G60260.1	phagocytosis and cell motility protein ELMO1-related, contains weak similarity to ELMO1 (Mus musculus) gi|16118551|gb|AAL14464	3.47211	1.64752	2.55981	19.7429			AT1G20770	0	1
CATMA3a10650	AT3G11720	AT3G11720.1	expressed protein	1.30833	2.78809	2.04821	19.5247			AT3G55880	0	1
CATMA1a44825	AT1G53750	AT1G53750.1	26S proteasome AAA-ATPase subunit (RPT1a), similar to 26S proteasome ATPase subunit GI:1395190 from (Spinacia oleracea)	3.1395	2.47845	2.80897	19.4744
CATMA1a57210	AT1G67810	AT1G67810.1	Fe-S metabolism associated domain-containing protein, contains Pfam PF02657: Fe-S metabolism associated domain	2.43881	2.30527	2.37204	19.4526
CATMA4a32090	AT4G30480	AT4G30480.1	tetratricopeptide repeat (TPR)-containing protein, similar to SP|Q99614 Tetratricopeptide repeat protein 1 {Homo sapiens}; contains Pfam profile PF00515: TPR Domain	5.37254	3.28683	4.32969	19.1891
CATMA1a63290	AT1G73940	AT1G73940.1	expressed protein	2.28694	1.99436	2.14065	19.1151			AT3G12965	0	0
CATMA5a53320	AT5G57610	AT5G57610.1	protein kinase family protein, similar to protein kinase (Glycine max) GI:170047, MAP3K delta-1 protein kinase (Arabidopsis thaliana) GI:2253010; contains Pfam profile: PF00069 Eukaryotic protein kinase domain	1.60936	2.81761	2.21348	18.8109			AT1G61770	0	1
CATMA4a02690	AT4G02400	AT4G02400.1	U3 ribonucleoprotein (Utp) family protein, contains Pfam profile: PF04615 Utp14 protein	2.2699	1.99737	2.13363	18.7346			Summen	5	69
CATMA3a24390	AT3G24500	AT3G24500.1	One of three genes in A. thaliana encoding multiprotein bridging factor 1, a highly conserved transcriptional coactivator. May serve as a bridging factor between a bZIP factor and TBP. Its expression is specifically elevated in response to pathogen	1.39339	4.89403	3.14371	18.3439
CATMA2a25540	AT2G27170	AT2G27170.1	similar to SMC2-like condensin, putative (SMC2) (TITAN3) [Arabidopsis thaliana] (TAIR:At5g62410.1); similar to cohesin complex subunit [Gallus gallus] (GB:NP_989848.1); similar to chondroitin sulfate proteoglycan 6 [Mus musculus] (GB:NP_031816.2); si	2.4029	2.59881	2.50086	18.3399
CATMA2a36300	AT2G37990	AT2G37990.1	ribosome biogenesis regulatory protein (RRS1) family protein, contains Pfam profile PF04939: Ribosome biogenesis regulatory protein (RRS1); similar to Ribosome biogenesis regulatory protein homolog (Swiss-Prot:Q15050) (Homo sapiens)	1.99079	2.11476	2.05277	18.2659			Prozent bestätigt von überlappenden	#DIV/0!
CATMA1a17460	AT1G18420	AT1G18420.1	expressed protein, contains Pfam profile PF01027: Uncharacterized protein family UPF0005	1.44915	2.78526	2.1172	18.2299			Prozent nicht überlappende		100
CATMA4a39130	AT4G37590	AT4G37590.1	phototropic-responsive NPH3 family protein, contains NPH3 family domain, Pfam:PF03000	3.15545	2.57058	2.86302	18.1221
CATMA1a03060	AT1G04190	AT1G04190.1	tetratricopeptide repeat (TPR)-containing protein, low similarity to protein antigen LmSTI1 (Leishmania major) GI:1698880; contains Pfam profile PF00515 TPR Domain; EST gb|Z47802 and gb|Z48402 come from this gene	2.19465	2.38266	2.28865	18.0594
CATMA1a19830	AT1G20770	AT1G20770.1	expressed protein	3.0031	2.4586	2.73085	18.0198
CATMA3a48860	AT3G55880	AT3G55880.1	expressed protein	3.73873	1.93673	2.83773	17.755
CATMA4a15100	AT4G14700	AT4G14700.1	replication control protein, putative, similar to origin recognition complex subunit 1 (Replication control protein 1) (Homo sapiens) SWISS-PROT:Q13415	2.38433	2.31147	2.3479	17.6314
CATMA3a11960	NA	CATMA3a11960	NA	2.83688	2.3629	2.59989	17.5551
CATMA1a50850	AT1G61770	AT1G61770.1	DNAJ heat shock N-terminal domain-containing protein, similar to SP|Q9UBS4 DnaJ homolog subfamily B member 11 precursor Homo sapiens; contains Pfam profile PF00226 DnaJ domain	3.62463	1.71024	2.66743	17.4048
CATMA4a23570	AT4G21890	AT4G21890.1	expressed protein	4.33012	4.9408	4.63546	16.9244
CATMA5a43910	AT5G47940	AT5G47940.1	expressed protein	2.57038	2.57362	2.572	16.8729
CATMA5a37260	AT5G41670	AT5G41670.1	6-phosphogluconate dehydrogenase family protein, contains Pfam profiles: PF00393 6-phosphogluconate dehydrogenase C-terminal domain, PF03446 NAD binding domain of 6-phosphogluconate	2.55385	1.8481	2.20098	16.7079
CATMA4a20380	AT4G19190	AT4G19190.1	zinc knuckle (CCHC-type) family protein, contains Pfam domain, PF00098: Zinc knuckle	2.49021	1.77255	2.13138	16.6662
CATMA3a13920	AT3G14600	AT3G14600.1	60S ribosomal protein L18A (RPL18aC), similar to GB:CAA08791 from (Podocoryne carnea)	2.68118	1.73181	2.2065	16.4777
CATMA2a44130	AT2G45730	AT2G45730.1	eukaryotic initiation factor 3 gamma subunit family protein, contains Pfam profile PF04189: Eukaryotic initiation factor 3, gamma subunit	2.96182	2.3688	2.66531	16.4063
CATMA1a27885	AT1G29900	AT1G29900.1	carbamoyl-phosphate synthase family protein, similar to carbamoylphosphate synthetase GI:6552726 from (Medicago sativa); contains Pfam profiles PF02786: Carbamoyl-phosphate synthase L chain ATP binding domain, PF00289: Carbamoyl-phosphate synthase L	1.87613	2.56926	2.22269	16.3423
CATMA1a27300	AT1G29320	AT1G29320.1	transducin family protein / WD-40 repeat family protein, contains 3 WD-40 repeats (PF00400); similar to meiotic recombination protein REC14 (GI:11139242) (Homo sapiens); similar to unknown protein GI:13623493 (Homo sapiens)	1.31184	3.13913	2.22548	16.19
CATMA1a01750	AT1G02816	AT1G02816.1	expressed protein, contains Pfam profile PF04398: Protein of unknown function, DUF538	3.13537	1.45625	2.29581	16.1812
CATMA3a08160	AT3G09300	AT3G09300.1	oxysterol-binding family protein, similar to SP|P22059 Oxysterol-binding protein 1 {Homo sapiens}; contains Pfam profile PF01237: Oxysterol-binding protein	2.71433	1.5891	2.15172	15.9979
CATMA2a03130	AT2G04160	AIR3	isolated from differential screening of a cDNA library from auxin-treated root culture. encodes a protein similar to subtilisin-like serine protease which is believed to be active outside the plant cell.	2.58606	1.96252	2.27429	15.8447
CATMA3a01490	AT3G02530	AT3G02530.1	chaperonin, putative, similar to SWISS-PROT:P80317- T-complex protein 1, zeta subunit (TCP-1-zeta) (Mus musculus); contains Pfam:PF00118 domain, TCP-1/cpn60 chaperonin family	2.26222	2.00891	2.13556	15.8114
CATMA3b25075	AT3G25230	AT3G25230.1	peptidyl-prolyl cis-trans isomerase / FK506-binding protein (ROF1), identical to rotamase FKBP (ROF1) GB:U49453 (Arabidopsis thaliana) (Mol. Gen. Genet. 252 (5), 510-517 (1996))	1.0441	5.6042	3.32415	15.7686
CATMA1a20630	AT1G21560	AT1G21560.1	expressed protein, similar to hypothetical protein [Arabidopsis thaliana] (TAIR:At4g01170.1); similar to unknown protein [Oryza sativa (japonica cultivar-group)] (GB:AAV24769.1)	3.30855	3.81558	3.56206	15.7633
CATMA4a19990	AT4G18880	AT-HSFA4A	member of Heat Stress Transcription Factor (Hsf) family	4.9721	1.38782	3.17996	15.5805
CATMA2a22260	AT2G23930	AT2G23930.1	small nuclear ribonucleoprotein G, putative / snRNP-G, putative / Sm protein G, putative, similar to small nuclear ribonucleoprotein G (snRNP-G, Sm protein G, Sm-G, SmG) (Homo sapiens) SWISS-PROT:Q15357	2.49424	1.94374	2.21899	15.5572
CATMA1a63715	AT1G74310	AT1G74310.1	heat shock protein 101 (HSP101), identical to heat shock protein 101 GI:6715468 GB:AAF26423 from (Arabidopsis thaliana)	0.708633	6.51802	3.61333	15.5201
CATMA5a58460	AT5G62900	AT5G62900.1	expressed protein	3.97602	3.89175	3.93388	15.5103
CATMA3a07780	NA	CATMA3a07780	NA	2.11671	1.95939	2.03805	15.4412
CATMA3a52990	AT3G59990	AT3G59990.1	methionyl aminopeptidase, putative / methionine aminopeptidase, putative / peptidase M, putative, similar to Methionine aminopeptidase 2 (EC 3.4.11.18) from {Rattus norvegicus} SP|P38062, {Homo sapiens} SP|P50579; contains Pfam profile PF00557: metal	2.56341	1.94	2.2517	15.2771
CATMA4a11015	AT4G10920	AT4G10920.1	transcriptional coactivator p15 (PC4) family protein (KELP), similar to SP|P53999 Activated RNA polymerase II transcriptional coactivator p15 (PC4) (p14) {Homo sapiens}; contains Pfam profile PF02229: Transcriptional Coactivator p15 (PC4); supporting	1.61848	2.54648	2.08248	15.1388
CATMA3a04940	AT3G05910	AT3G05910.1	pectinacetylesterase, putative, similar to pectinacetylesterase precursor GI:1431629 from (Vigna radiata)	2.6376	1.77528	2.20644	15.0221
CATMA4a39320	AT4G37820	AT4G37820.1	expressed protein, Kaposi's sarcoma-associated herpes-like virus ORF73gene, Kaposi's sarcoma-associated herpesvirus, U52064	1.49571	3.04955	2.27263	14.9176
CATMA1a65265	AT1G76030	AT1G76030.1	vacuolar ATP synthase subunit B / V-ATPase B subunit / vacuolar proton pump B subunit / V-ATPase 57 kDa subunit, identical to SP|P11574 Vacuolar ATP synthase subunit B (EC 3.6.3.14) (V-ATPase B subunit) (Vacuolar proton pump B subunit) (V-ATPase 57 k	2.58163	2.32541	2.45352	14.7804
CATMA4a41420	AT4G40010	AT4G40010.1	serine/threonine protein kinase, putative, similar to serine-threonine protein kinase (Triticum aestivum) gi|2055374|gb|AAB58348	1.06571	3.82968	2.44769	14.7003
CATMA5a19590	AT5G21060	AT5G21060.1	homoserine dehydrogenase family protein, similar to aspartokinase-homoserine dehydrogenase (Glycine max) GI:2970447, GI:2970556; contains Pfam profile PF00742: Homoserine dehydrogenase	2.38923	2.02202	2.20563	14.5698
CATMA1a08620	AT1G09780	AT1G09780.1	2,3-biphosphoglycerate-independent phosphoglycerate mutase, putative / phosphoglyceromutase, putative, strong similarity to SP|Q42908 2,3-bisphosphoglycerate-independent phosphoglycerate mutase (EC 5.4.2.1) (Phosphoglyceromutase) {Mesembryanthemum cr	2.38539	1.71686	2.05113	14.4011
CATMA4a13955	AT4G13770	AT4G13770.1	cytochrome P450 family protein	3.81386	1.64786	2.73086	14.07
CATMA2a02030	AT2G03120	AT2G03120.1	signal peptide peptidase family protein, contains Pfam domain PF04258: Membrane protein of unknown function (DUF435)	2.60318	2.09132	2.34725	14.0004
CATMA3a41910	AT3G48930	AT3G48930.1	40S ribosomal protein S11 (RPS11A)	2.49727	2.06419	2.28073	13.9462
CATMA3a15420	AT3G16000	AT3G16000.1	matrix-localized MAR DNA-binding protein-related, similar to matrix-localized MAR DNA binding protein MFP1 GI:1771158 from (Lycopersicon esculentum)	1.33181	2.9336	2.1327	13.7477
CATMA3a07810	AT3G08970	AT3G08970.1	DNAJ heat shock N-terminal domain-containing protein, low similarity to PIR|A47079|A47079 heat shock protein dnaJ - Lactococcus lactis; contains Pfam profile PF00226 DnaJ domain	1.16608	5.48973	3.3279	13.6904
CATMA2a20200	AT2G21520	AT2G21520.1	similar to SEC14 cytosolic factor, putative / phosphoglyceride transfer protein, putative [Arabidopsis thaliana] (TAIR:At4g39170.1); similar to putative hosphatidylinositol/phophatidylcholine transfer protein [Oryza sativa (japonica cultivar-group)]	3.19869	1.37266	2.28567	13.6742
CATMA1a09930	AT1G11060	AT1G11060.1	expressed protein	1.89768	2.26744	2.08256	13.6034
CATMA2a45720	AT2G47250	AT2G47250.1	RNA helicase, putative, similar to SP|P53131 Pre-mRNA splicing factor RNA helicase PRP43 (Helicase JA1) {Saccharomyces cerevisiae}; contains Pfam profiles PF04408: Helicase associated domain (HA2), PF00271: Helicase conserved C-terminal domain	2.81874	2.21905	2.51889	13.5968
CATMA3a44820	AT3G51910	AT-HSFA7A	member of Heat Stress Transcription Factor (Hsf) family	1.30583	3.00459	2.15521	13.5571
CATMA2a42540	AT2G44120	AT2G44120.1	60S ribosomal protein L7 (RPL7C)	2.45244	1.80937	2.1309	13.5502
CATMA1a12010	AT1G13030	AT1G13030.1	sphere organelles protein-related, contains weak similarity to Swiss-Prot:Q09003 sphere organelles protein SPH-1 (Sphere protein 1) (Xenopus laevis)	1.57325	2.92031	2.24678	13.4752
CATMA5a24265	AT5G26830	AT5G26830.1	threonyl-tRNA synthetase / threonine--tRNA ligase (THRRS), identical to SP|O04630 Threonyl-tRNA synthetase, mitochondrial precursor (EC 6.1.1.3) (Threonine--tRNA ligase) (ThrRS) {Arabidopsis thaliana}	1.98265	2.13158	2.05712	13.4274
CATMA2a24900	AT2G26590	AT2G26590.1	adhesion regulating molecule family, similar to oocyte membrane protein (GI:6174842) (Xenopus laevis); similar to Adhesion regulating molecule 1 precursor (110 kDa cell membrane glycoprotein) (Gp110) (Swiss-Prot:Q16186) (Homo sapiens); contains Pfam	2.05066	2.08791	2.06928	13.18
CATMA1a25965	AT1G27730	AT1G27730.1	Salt tolerance zinc finger protein responsive to chitin oligomers.	3.58384	0.91939	2.25162	13.1298
CATMA3a22130	AT3G22200	AT3G22200.1	4-aminobutyrate aminotransferase / gamma-amino-N-butyrate transaminase / GABA transaminase / beta-alanine--oxoglutarate aminotransferase, identical to gamma-aminobutyrate transaminase subunit precursor (Arabidopsis thaliana) (EC 2.6.1.19) GI:14030435	4.69296	2.61402	3.65349	13.0807
CATMA2a46010	AT2G47550	AT2G47550.1	pectinesterase family protein, contains Pfam profile: PF01095 pectinesterase	1.9086	3.02077	2.46469	12.7424
CATMA1a67670	AT1G78610	AT1G78610.1	mechanosensitive ion channel domain-containing protein / MS ion channel domain-containing protein, contains Pfam profile PF00924: Mechanosensitive ion channel	1.78598	2.30384	2.04491	12.6326
CATMA2a38180	AT2G39960	AT2G39960.1	microsomal signal peptidase 25 kDa subunit, putative (SPC25), identical to Probable microsomal signal peptidase 25 kDa subunit (EC 3.4.-.-) (SPase 25 kDa subunit) (SPC25) (Swiss-Prot:P58684) (Arabidopsis thaliana); contains non-consensus AT-AC splice	2.31967	1.97992	2.14979	12.6271
CATMA1b46590	AT1G55490	AT1G55490.1	RuBisCO subunit binding-protein beta subunit, chloroplast / 60 kDa chaperonin beta subunit / CPN-60 beta, identical to SWISS-PROT:P21240- RuBisCO subunit binding-protein beta subunit, chloroplast precursor (60 kDa chaperonin beta subunit, CPN-60 beta	2.68853	2.38931	2.53892	12.558
CATMA1a56230	AT1G66940	AT1G66940.1	protein kinase-related	5.00909	1.14355	3.07632	12.5254
CATMA4a18150	AT4G17120	AT4G17120.1	expressed protein	1.8529	2.76961	2.31125	12.2217
CATMA4a13260	AT4G13160	AT4G13160.1	expressed protein, contains Pfam profile PF04576: Protein of unknown function, DUF593	1.51268	2.71128	2.11198	12.1304
CATMA2a37680	AT2G39420	AT2G39420.1	esterase/lipase/thioesterase family protein, similar to monoglyceride lipase from (Homo sapiens) GI:14594904, (Mus musculus) GI:2632162; contains Interpro entry IPR000379	1.92315	2.34228	2.13271	12.0926
CATMA1a38040	AT1G45170	AT1G45170.1	expressed protein, similar to expressed protein [Arabidopsis thaliana] (TAIR:At5g42960.1); similar to expressed protein [Oryza sativa (japonica cultivar-group)] (GB:XP_470465.1)	2.08147	2.02151	2.05149	11.9423
CATMA5a37200	AT5G41600	AT5G41600.1	reticulon family protein (RTNLB4), weak similarity to Nogo-C protein (Rattus norvegicus) GI:6822251, SP|O95197 Reticulon protein 3 (Neuroendocrine-specific protein-like) {Homo sapiens}; contains Pfam profile PF02453: Reticulon	2.30367	1.93271	2.11819	11.8045
CATMA3a08550	AT3G09690	AT3G09690.1	hydrolase, alpha/beta fold family protein, contains Pfam profile PF00561: hydrolase, alpha/beta fold family	2.63652	1.83787	2.2372	11.7772
CATMA1a08700	AT1G09850	AT1G09850.1	cysteine protease, papain-like (XBCP3), identical to papain-like cysteine peptidase XBCP3 GI:14600257 from (Arabidopsis thaliana); contains Pfam profiles PF00112: Papain family cysteine protease and PF00396: Granulin	2.56319	2.33924	2.45122	11.7163
CATMA5a60250	AT5G64813	AT5G64813.1	GTP-binding protein-related, contains weak similarity to Ras-related protein Rab-27A (Rab-27) (GTP-binding protein Ram) (Swiss-Prot:P51159) (Homo sapiens)	2.7212	1.31181	2.0165	11.6532
CATMA4a31110	AT4G29480	AT4G29480.1	mitochondrial ATP synthase g subunit family protein, contains Pfam profile: PF04718 mitochondrial ATP synthase g subunit	3.32445	1.71639	2.52042	11.6285
CATMA4a09570	AT4G09560	AT4G09560.1	protease-associated zinc finger (C3HC4-type RING finger) family protein, contains Pfam domain, PF02225: protease-associated (PA) domain and Pfam domain, PF00097: Zinc finger, C3HC4 type (RING finger); similar to ReMembR-H2 protein JR702 (Arabidopsis	2.67389	2.70346	2.68867	11.6211
CATMA1a44830	AT1G53760	AT1G53760.1	expressed protein	1.66921	3.05621	2.36271	11.3842
CATMA5a36350	AT5G40650	AT5G40650.1	succinate dehydrogenase, iron-sulphur subunit, mitochondrial (SDH2-2), nearly identical to mitochondrial succinate dehydrogenase iron-sulphur subunit (sdh2-2) (gi:12049600) from Arabidopsis thaliana	2.33371	1.87448	2.1041	11.3139
CATMA1a18380	AT1G19360	AT1G19360.1	expressed protein	3.00251	1.8322	2.41735	11.2975
CATMA5a54250	AT5G58490	AT5G58490.1	cinnamoyl-CoA reductase family, similar to cinnamoyl-CoA reductase from Pinus taeda (GI:17978649), Eucalyptus gunnii (GI:2058311)	2.65278	1.45736	2.05507	11.2502
CATMA5a43540	AT5G47570	AT5G47570.1	expressed protein	3.98574	3.16289	3.57431	11.2036
CATMA3a41735	AT3G48750	AT3G48750.1	A-type cyclin-dependent kinase. Together with its specific inhibitor, the Kip-related protein, KRP2 they regulate the mitosis-to-endocycle transition during leaf development.	3.20564	3.10064	3.15314	11.1696
CATMA4a00780	AT4G00710	AT4G00710.1	protein kinase family protein, low similarity to protein kinase (Arabidopsis thaliana) GI:2852449; contains Pfam profile: PF00069 Protein kinase domain	4.17253	3.09915	3.63584	11.1326
CATMA2a29620	AT2G31380	AT2G31380.1	zinc finger (B-box type) family protein / salt tolerance-like protein (STH), contains Pfam profile PF00643: B-box zinc finger; identical to cDNA B-box zinc finger protein STH GI:12698721, SP|Q9SID1 Salt tolerance-like protein (Arabidopsis thaliana)	2.34296	2.05647	2.19971	11.0644
CATMA3a23510	AT3G23600	AT3G23600.1	dienelactone hydrolase family protein, similar to SP|Q9ZT66 Endo-1,3;1,4-beta-D-glucanase precursor (EC 3.2.1.-) {Zea mays}; contains Pfam profile: PF01738 Dienelactone hydrolase family	2.75616	1.82046	2.28831	11.0228
CATMA4a02070	AT4G01850	AT4G01850.1	S-adenosylmethionine synthetase 2 (SAM2), identical to S-adenosylmethionine synthetase 2 (Methionine adenosyltransferase 2, AdoMet synthetase 2) (Arabidopsis thaliana) SWISS-PROT:P17562	3.06775	1.88159	2.47467	11.0057
CATMA3a14835	AT3G15410	AT3G15410.1	leucine-rich repeat family protein, contains leucine rich-repeat (LRR) domains Pfam:PF00560, INTERPRO:IPR001611; contains similarity to Hcr2-5D (Lycopersicon esculentum) gi|3894393|gb|AAC78596; identical to leucine-rich repeat protein (Arabidopsis th	2.3705	1.72557	2.04804	10.9884
CATMA2a30720	AT2G32430	AT2G32430.1	galactosyltransferase family protein, contains Pfam profile: PF01762 galactosyltransferase	2.27836	2.45341	2.36589	10.9618
CATMA3a13620	AT3G14340	AT3G14340.1	expressed protein	2.82359	2.05655	2.44007	10.9243
CATMA2a16920	AT2G18250	AT2G18250.1	cytidylyltransferase domain-containing protein, similar to CoA synthase (Mus musculus) GI:21780289, bifunctional phosphopantetheine adenylyl transferase / dephospho CoA kinase (Sus scrofa) GI:20465246; contains Pfam profile PF01467: Cytidylyltransfer	2.57498	2.19335	2.38416	10.8676
CATMA5a07720	AT5G08415	AT5G08415.1	lipoic acid synthase family protein, similar to lipoic acid synthase from Arabidopsis thaliana (gi:3928758), from Mus musculus (gi:14669826) Pfam profile PF04055: radical SAM domain protein	2.77695	2.07419	2.42557	10.7922
CATMA2a25170	AT2G26830	AT2G26830.1	choline/ethanolamine kinase family protein, similar to SP|Q9HBU6 Ethanolamine kinase (EC 2.7.1.82) (EKI){Homo sapiens}, GmCK3p (Glycine max) GI:1438883; contains Pfam profile PF01633: Choline/ethanolamine kinase	2.07713	2.12358	2.10035	10.7384
CATMA2a34330	AT2G36130	AT2G36130.1	peptidyl-prolyl cis-trans isomerase, putative / cyclophilin, putative / rotamase, putative, contains Pfam domain, PF00160: peptidyl-prolyl cis-trans isomerase, cyclophilin-type	2.12535	2.06823	2.09679	10.7133
CATMA4a22750	AT4G21160	AT4G21160.1	zinc finger and C2 domain protein (ZAC), identical to zinc finger and C2 domain protein GI:9957238 from (Arabidopsis thaliana)	2.46345	1.70674	2.08509	10.6079
CATMA5a08580	AT5G09770	AT5G09770.1	ribosomal protein L17 family protein, contains Pfam profile: PF01196 ribosomal protein L17	3.92949	2.09063	3.01006	10.5956
CATMA2a43870	AT2G45470	AT2G45470.1	fasciclin-like arabinogalactan-protein (FLA8)	2.61284	1.9335	2.27317	10.415
CATMA1a14190	AT1G15200	AT1G15200.1	protein-protein interaction regulator family protein, contains Pfam PF04696: pinin/SDK/memA/ protein conserved region	2.22087	1.95765	2.08926	10.3287
CATMA5a55220	AT5G59480	AT5G59480.1	haloacid dehalogenase-like hydrolase family protein, low similarity to SP|P53078 SSM1 protein {Saccharomyces cerevisiae}; contains InterPro accession IPR005834: Haloacid dehalogenase-like hydrolase	2.58278	3.54431	3.06355	10.2644
CATMA4a19420	AT4G18360	AT4G18360.1	(S)-2-hydroxy-acid oxidase, peroxisomal, putative / glycolate oxidase, putative / short chain alpha-hydroxy acid oxidase, putative, similar to (S)-2-hydroxy-acid oxidase, peroxisomal (Glycolate oxidase, GOX) (Short chain alpha-hydroxy acid oxidase) (	2.54901	1.57501	2.06201	10.2589
CATMA2a25320	AT2G26970	AT2G26970.1	exonuclease family protein, contains exonuclease domain, Pfam:PF00929	1.85886	2.23379	2.04632	10.2519
CATMA2a37135	AT2G38880	AT2G38880.1	histone-like transcription factor (CBF/NF-Y) family protein, similar to CAAT-box DNA binding protein subunit B (NF-YB) (SP:P25209) (GI:22380) (Zea mays) and CCAAT-binding transcription factor subunit A (CBF-A) (NF-Y protein chain B) (NF-YB) (CAAT-bo	2.71621	2.61183	2.66402	10.1401
CATMA5a48515	AT5G52640	AT5G52640.1	heat shock protein 81-1 (HSP81-1) / heat shock protein 83 (HSP83), nearly identical to SP|P27323 Heat shock protein 81-1 (HSP81-1) (Heat shock protein 83) {Arabidopsis thaliana}; contains Pfam profiles PF02518: ATPase, histidine kinase-, DNA gyrase B	1.65645	5.56385	3.61015	10.1031
CATMA1a61410	AT1G72180	AT1G72180.1	leucine-rich repeat transmembrane protein kinase, putative, similar to GI:3641252 from (Malus x domestica) (Plant Mol. Biol. 40 (6), 945-957 (1999))	2.77133	2.12714	2.44924	10.0947
CATMA5a17990	AT5G19550	ASP2	Nitrogen metabolism. Major cytosolic isoenzyme controlling aspartate biosynthesis in the light.	2.62796	1.82941	2.22868	9.9926
CATMA2a16010	AT2G17280	AT2G17280.1	phosphoglycerate/bisphosphoglycerate mutase family protein, contains Pfam profile PF00300: phosphoglycerate mutase family	5.28372	4.82949	5.05661	9.95034
CATMA3a52330	AT3G59280	AT3G59280.1	signaling molecule-related, contains similarity to mitochondria-associated granulocyte macrophage CSF signaling molecule, mitochondrial precursor (CGI-136) (Mus musculus) SWISS-PROT:Q9CQV1	2.50662	1.71896	2.11279	9.87309
CATMA1a62920	AT1G73600	AT1G73600.1	phosphoethanolamine N-methyltransferase 3, putative (NMT3), strong similarity to SP|Q9FR44 Phosphoethanolamine N-methyltransferase 1 (EC 2.1.1.103) (PEAMT 1) (AtNMT1) {Arabidopsis thaliana}; identical to SP|Q9C6B9 Putative phosphoethanolamine N-methy	3.22649	1.90281	2.56465	9.63273
CATMA3a41660	AT3G48690	AT3G48690.1	expressed protein, similar to PrMC3 (Pinus radiata) GI:5487873	2.32327	1.77666	2.04997	9.4569
CATMA2a44180	AT2G45790	AT2G45790.1	eukaryotic phosphomannomutase family protein, contains Pfam profile: PF03332 eukaryotic phosphomannomutase	2.87548	1.57623	2.22585	9.38227
CATMA1a22340	AT1G23260	AT1G23260.1	ubiquitin-conjugating enzyme family protein, similar to TRAF6-regulated IKK activator 1 beta Uev1A (Homo sapiens) GI:10880969; contains Pfam profile PF00179: Ubiquitin-conjugating enzyme	3.3524	1.91609	2.63425	9.32216
CATMA5a62300	AT5G66870	ASL1	Encodes LOB domain protein whose overexpression results in KNOX gene repression. Overexpression also results in plants with hyponastic leaves, downward pointing flowers and reduced apical dominance. May be involved in the transcriptional regulation	2.2196	3.00256	2.61108	9.26897
CATMA5a59367	AT5G63870	AT5G63870.1	serine/threonine protein phosphatase (PP7), identical to PP7 (Arabidopsis thaliana) GI:2791900	2.47257	1.70252	2.08754	9.24746
CATMA1a32220	AT1G33990	AT1G33990.1	hydrolase, alpha/beta fold family protein, similar to polyneuridine aldehyde esterase GI:6651393 from (Rauvolfia serpentina), SP|Q40708 PIR7A protein {Oryza sativa}, ethylene-induced esterase (Citrus sinensis) GI:14279437; contains Pfam profile PF005	2.07811	2.34868	2.2134	9.23121
CATMA1a59570	AT1G70290	AT1G70290.1	trehalose-6-phosphate synthase, putative, similar to Alpha,alpha-trehalose-phosphate synthase (UDP-forming) (EC 2.4.1.15) (Trehalose-6-phosphate synthase) from {Kluyveromyces lactis} SP|Q07158, {Saccharomyces cerevisiae} SP|Q00764; contains Pfam prof	4.5963	2.18897	3.39263	9.09085
CATMA5a49530	AT5G53650	AT5G53650.1	expressed protein	2.31433	1.79459	2.05446	9.0897
CATMA4a13900	AT4G13720	AT4G13720.1	inosine triphosphate pyrophosphatase, putative / HAM1 family protein, contains Pfam profile PF01725: Ham1 family; similar to inosine triphosphate pyrophosphatase (GI:13398328) (Homo sapiens)	2.76846	1.36298	2.06572	9.01073
CATMA1a02980	AT1G04120	AT1G04120.1	ABC transporter family protein, Strong similarity to MRP-like ABC transporter gb|U92650 from A. thaliana and canalicular multi-drug resistance protein gb|L49379 from Rattus norvegicus	2.65836	1.79462	2.22649	8.9238
CATMA1a30110	AT1G31850	AT1G31850.1	dehydration-responsive protein, putative, strong similarity to early-responsive to dehydration stress ERD3 protein (Arabidopsis thaliana) GI:15320410; contains Pfam profile PF03141: Putative methyltransferase	1.07847	11.1301	6.10427	8.82943
CATMA4a15410	AT4G14950	AT4G14950.1	expressed protein	2.39974	2.20052	2.30013	8.80342
CATMA1a30390	AT1G32050	AT1G32050.1	secretory carrier membrane protein (SCAMP) family protein, contains Pfam domain, PF04144: SCAMP family	2.33836	2.24857	2.29347	8.79432
CATMA1a37860	AT1G44910	AT1G44910.1	similar to FF domain-containing protein / WW domain-containing protein [Arabidopsis thaliana] (TAIR:At3g19670.1); similar to formin binding protein 3-like [Oryza sativa (japonica cultivar-group)] (GB:BAD87484.1); contains InterPro domain FF domain (I	1.71314	2.36775	2.04045	8.73582
CATMA2a46160	AT2G47730	AT2G47730.1	glutathione S-transferase 6 (GST6), identical to GB:X95295. Based on identical cDNA hits, the translation is now 40 AAs longer at the N-terminal, and start of exon2 is also corrected.	3.1072	1.68185	2.39453	8.69886
CATMA4a12730	AT4G12570	AT4G12570.1	ubiquitin-protein ligase, putative, similar to SP|P39940 Ubiquitin--protein ligase RSP5 (EC 6.3.2.-) {Saccharomyces cerevisiae}; contains Pfam profiles PF00240: Ubiquitin family, PF00632: HECT-domain (ubiquitin-transferase)	2.62598	1.66638	2.14618	8.3562
CATMA3a39230	AT3G46220	AT3G46220.1	expressed protein	0.543104	4.44699	2.49505	8.34571
CATMA1a42690	AT1G51560	AT1G51560.1	expressed protein	1.53658	3.26197	2.39927	8.04548
CATMA1a01765	AT1G02840	AT1G02840.1	pre-mRNA splicing factor SF2 (SF2) / SR1 protein, identical to SP|O22315 Pre-mRNA splicing factor SF2 (SR1 protein) {Arabidopsis thaliana}	2.10943	2.0514	2.08041	8.01214
CATMA5a21225	AT5G23740	AT5G23740.1	40S ribosomal protein S11 (RPS11C)	3.54542	2.92186	3.23364	7.77503
CATMA3b41885	AT3G48890	AT3G48890.1	cytochrome b5 domain-containing protein, similar to SP|O00264 Membrane associated progesterone receptor component (mPR) {Homo sapiens}; contains Pfam profile PF00173: Heme/Steroid binding domain	2.14212	1.95826	2.05019	7.67476
CATMA2b15865	AT2G17120	AT2G17120.1	peptidoglycan-binding LysM domain-containing protein, contains Pfam profile PF01476: LysM domain; supporting cDNA gi|16226688|gb|AF428464.1|AF428464	2.56406	2.03006	2.29706	7.61258
CATMA1a06860	AT1G07830	AT1G07830.1	ribosomal protein L29 family protein, similar to GB:CAA83057 from (Saccharomyces cerevisiae)	2.62683	2.23872	2.43278	7.46467
CATMA1a54200	AT1G64890	AT1G64890.1	integral membrane transporter family protein, contains 11 transmembrane domains; contains Pfam PF03092: BT1 family; contains TIGRFAMS TIGR00788: folate/biopterin transporter	1.50773	2.60712	2.05743	7.42648
CATMA1a06470	AT1G07400	AT1G07400.1	17.8 kDa class I heat shock protein (HSP17.8-CI), similar to 17.5 kDa class I heat shock protein SP:P04793 from (Glycine max); contains Pfam PF00011: Hsp20/alpha crystallin family	0.860927	5.37154	3.11624	7.42506
CATMA5a39420	AT5G43600	AT5G43600.1	N-carbamyl-L-amino acid hydrolase, putative, similar to N-carbamoyl-L-amino acid hydrolase (Bacillus stearothermophilus) SWISS-PROT:Q53389	2.68229	2.30615	2.49422	7.41227
CATMA3a35130	AT3G42860	AT3G42860.1	zinc knuckle (CCHC-type) family protein, contains Pfam domain, PF00098: Zinc knuckle	1.8016	2.59898	2.20029	7.27086
CATMA3b04930	AT3G05900	AT3G05900.1	neurofilament protein-related, similar to NF-180 (GI:632549) (Petromyzon marinus) similar to Neurofilament triplet H protein (200 kDa neurofilament protein) (Neurofilament heavy polypeptide) (NF-H) (Swiss-Prot:P12036) (Homo sapiens)	0.955328	3.35737	2.15635	6.86807
CATMA5a43640	AT5G47660	AT5G47660.1	DNA-binding protein-related, similar to GTL1 (Arabidopsis thaliana) GI:2664198	3.17404	2.3243	2.74917	6.6538
CATMA1a08650	AT1G09810	AT1G09810.1	expressed protein, contains Pfam profile PF04146: YT521-B-like family	2.6023	2.21946	2.41088	6.2066
CATMA4a08060	AT4G08310	AT4G08310.1	expressed protein, glutamic acid-rich protein precursor - Plasmodium falciparum, PIR2:A54514	2.16302	1.89054	2.02678	6.19888
CATMA3a19050	AT3G19460	AT3G19460.1	reticulon family protein (RTNLB11), weak similarity to neuroendocrine-specific protein C (Homo sapiens) GI:307311; identical to cDNA RTNLB11 GI:32331878	2.16735	2.37504	2.27119	5.82827
CATMA3a27115	AT3G27300	AT3G27300.1	glucose-6-phosphate 1-dehydrogenase / G6PD (ACG9), identical to glucose-6-phosphate 1-dehydrogenase (acg9) (Arabidopsis thaliana) GI:5732195	2.2382	1.98343	2.11082	5.39908
CATMA1b52130	AT1G62970	AT1G62970.1	DNAJ heat shock N-terminal domain-containing protein, low similarity to AHM1 (Triticum aestivum) GI:6691467; contains Pfam profile PF00226: DnaJ domain	2.12749	2.83317	2.48033	5.28541
CATMA2a00320	AT2G01260	AT2G01260.1	expressed protein	2.4251	1.86575	2.14543	5.0965
CATMA1a58340	AT1G68940	AT1G68940.1	armadillo/beta-catenin repeat protein-related / U-box domain-containing protein, ; contains Pfam profile PF04564: U-box domain	2.52425	2.88093	2.70259	4.91007
CATMA1a63360	AT1G74010	AT1G74010.1	strictosidine synthase family protein, similar to strictosidine synthase (Rauvolfia serpentina)(SP|P15324); contains strictosidine synthase domain PF03088	2.08249	2.08047	2.08148	4.63086
CATMA4a02465	AT4G02195	AT4G02195.1	syntaxin 42 (SYP42) / TLG2b, identical to SP|Q9SWH4 Syntaxin 42 (AtSYP42) (AtTLG2b) {Arabidopsis thaliana}	2.97153	3.14343	3.05748	4.5959
CATMA5a08130	AT5G09320	AT5G09320.1	vacuolar sorting protein 9 domain-containing protein / VPS9 domain-containing protein, contains similarity to Rab5 GDP/GTP exchange factor, Rabex5 (Bos taurus) gi|2558516|emb|CAA04545; contains Pfam profile PF02204: Vacuolar sorting protein 9 (VPS9)	3.06985	1.35116	2.2105	4.14318
CATMA3a29590	AT3G29390	AT3G29390.1	hydroxyproline-rich glycoprotein family protein, sequencing discrepancy between cDNA and genomic sequence prevents representation of entire coding sequence	2.11353	2.10594	2.10974	4.13497
CATMA5a59910	AT5G64480	AT5G64480.1	expressed protein	2.57777	2.91395	2.74586	3.92291
CATMA1a57830	AT1G68450	AT1G68450.1	VQ motif-containing protein, contains PF05678: VQ motif	3.71423	4.04609	3.88016	3.88371
CATMA5a39670	AT5G43830	AT5G43830.1	expressed protein, similar to auxin down-regulated protein ARG10 (Vigna radiata) GI:2970051, wali7 (aluminum-induced protein) (Triticum aestivum) GI:451193	2.39168	1.89039	2.14103	3.56642

## Sheet: (F) BAx down
CATMA ID	AGI	genename	description	Mean Ratio BA15 vs. BA0	Mean Ratio BA120 vs. BA0	Mean Ratio BAx vs. BA0	Meta Statistics
CATMA2b33400	AT2G35270	AT2G35270.1	DNA-binding protein-related, contains Pfam domain PF03479: Domain of unknown function (DUF296), found in AT-hook motifs Pfam:PF02178	0.651332	0.33437	0.492851	44.0708
CATMA2a27045	AT2G28630	AT2G28630.1	beta-ketoacyl-CoA synthase family protein	0.607918	0.386253	0.497086	38.2441
CATMA2a02430	AT2G03505	AT2G03505.1	glycosyl hydrolase family protein 17, similar to Glucan endo-1,3-beta-glucosidase precursor (EC 3.2.1.39) ((1-3)-beta- glucan endohydrolase) ((1-3)-beta-glucanase) (Beta-1,3- endoglucanase) (Swiss-Prot:P52409) (Triticum aestivum); similar to beta 1,3	0.446603	0.525262	0.485933	19.8003
CATMA5a20440	AT5G22940	AT5G22940.1	Homolog of FRA8 (AT2G28110), a member of a member of glycosyltransferase family 47; exhibits high sequence similarity to tobacco (Nicotiana plumbaginifolia) pectin glucuronyltransferase.	0.545846	0.405903	0.475874	15.2814
CATMA3a22530	AT3G22540	AT3G22540.1	expressed protein	0.556848	0.409227	0.483038	9.46659

## Sheet: (G) Top List
CATMA ID	AGI	genename	description	Mean Ratio BA15 vs. BA0	Mean Ratio BA120 vs. BA0	Mean Ratio BAx vs. BA0	Meta Statistics
CATMA5a58475	AT5G62920	ARR6	Encodes a Type-A response regulator that is responsive to cytokinin treatment. Its C-ter domain is very short in comparison to other Arabidopsis ARRs (17 total).	4.82586	3.08467	3.95527	129.822
CATMA3a37230	AT3G44326	CFB	similar to F-box family protein [Arabidopsis thaliana] (TAIR:AT2G27310.1); similar to F-box protein-like [Oryza sativa (japonica cultivar-group)] (GB:BAD27806.1); contains InterPro domain Cyclin-like F-box; (InterPro:IPR001810)	2.44325	2.42383	2.43354	94.1119
CATMA4a31370	AT4G29740	AT4G29740.1	FAD-binding domain-containing protein / cytokinin oxidase family protein, similar to cytokinin oxidase, Zea mays (gi:3882018) (gi:3441978)	7.59679	6.29332	6.94505	86.4106
CATMA1a18090	AT1G19050	ARR7	ARR7 mRNA for response regulator 7, complete cds	11.7229	8.94027	10.3316	85.0874
CATMA5a43950	AT5G47980	AT5G47980.1	transferase family protein, similar to alcohol acyltransferase (Fragaria x ananassa)(GI:10121328)(PMID:10810141), deacetylvindoline 4-O-acetyltransferase (Catharanthus roseus)(GI:4091808)(PMID:9681034)	2.00401	12.2898	7.1469	80.1774
CATMA1a57750	AT1G68360	AT1G68360.1	zinc finger protein-related, similar to zinc finger protein GI:790683 from (Arabidopsis thaliana)	3.01727	2.51279	2.76503	77.0101
CATMA5a17520	AT5G19110	AT5G19110.1	extracellular dermal glycoprotein-related / EDGP-related, similar to extracellular dermal glycoprotein EDGP precursor (Daucus carota) GI:285741	2.00714	4.48321	3.24518	76.8899
CATMA2a38980	AT2G40670	ARR16	response regulator 16	2.39088	7.51023	4.95055	75.3572
CATMA4a31320	AT4G29690	AT4G29690.1	type I phosphodiesterase/nucleotide pyrophosphatase family protein, similar to SP|P22413 Ectonucleotide pyrophosphatase/phosphodiesterase 1 (Plasma-cell membrane glycoprotein PC-1) (Includes: Alkaline phosphodiesterase I (EC 3.1.4.1); Nucleotide pyro	2.09631	6.76105	4.42868	67.1612
CATMA4a25570	AT4G23750	AT4G23750.1	encodes a member of the ERF (ethylene response factor) subfamily B-5 of ERF/AP2 transcription factor family. The protein contains one AP2 domain. There are 7 members in this subfamily.	2.00851	2.58176	2.29513	64.7217
CATMA4a38980	AT4G37410	AT4G37410.1	cytochrome P450, putative, similar to cytochrome p450 SP:O65790 from (Arabidopsis thaliana)	2.6329	7.58404	5.10847	56.6227
CATMA4a31330	AT4G29700	AT4G29700.1	type I phosphodiesterase/nucleotide pyrophosphatase family protein, similar to SP|P22413 Ectonucleotide pyrophosphatase/phosphodiesterase 1 (Plasma-cell membrane glycoprotein PC-1) (Includes: Alkaline phosphodiesterase I (EC 3.1.4.1); Nucleotide pyro	2.26456	4.56368	3.41412	50.8423
CATMA2a00940	AT2G01890	AT2G01890.1	purple acid phosphatase, putative, contains Pfam profile: PF00149 calcineurin-like phosphoesterase; identical to purple acid phosphatase (GI:20257479) (Arabidopsis thaliana);	2.11955	3.12	2.61978	44.0884
CATMA1a16200	AT1G17190	AT1G17190.1	glutathione S-transferase, putative, One of three repeated glutathione transferases. 65% identical to glutathione transferase (Arabidopsis thaliana) (gi|4006934). Location of est 141C5T7 (gb|T46669); supported by fl cDNA gi:14326476gb:AF385691.	2.49559	3.32668	2.91113	43.7904
CATMA2a39655	AT2G41310	ARR8	Encodes an A- type response Regulator that is primarily expressed in the root and is involved in cytokinin-mediated signalling.	2.67557	4.49817	3.58687	42.9733
CATMA4a25920	AT4G24190	AT4G24190.1	shepherd protein (SHD) / clavata formation protein, putative, nearly identical to SHEPHERD (Arabidopsis thaliana) GI:19570872; contains Pfam profiles PF02518: ATPase, histidine kinase-, DNA gyrase B-, and HSP90-like domain protein, PF00183: Hsp90 pro	2.07924	2.9148	2.49702	39.7752
CATMA1a41350	AT1G50280	AT1G50280.1	phototropic-responsive NPH3 family protein, contains NPH3 family domain, Pfam:PF03000	5.76435	9.10795	7.43615	39.6708
CATMA1a44090	AT1G53060	AT1G53060.1	legume lectin family protein	2.11957	16.159	9.13929	34.5725
CATMA1a26300	AT1G28100	AT1G28100.1	expressed protein	2.82959	3.7957	3.31265	33.7212
CATMA3a52020	AT3G58990	AT3G58990.1	aconitase C-terminal domain-containing protein, contains Pfam profile PF00694: Aconitase C-terminal domain	3.86195	2.2164	3.03918	32.9527
CATMA5a61570	AT5G66210	AT5G66210.1	calcium-dependent protein kinase family protein / CDPK family protein, contains Pfam domains, PF00069: Protein kinase domain and PF00036: EF hand	2.71432	2.13358	2.42395	32.6154
CATMA1a17855	AT1G18800	AT1G18800.1	nucleosome assembly protein (NAP) family protein, similar to SP|Q01105|SET protein (HLA-DR associated protein II) (PHAPII) (Phosphatase 2A inhibitor I2PP2A) {Homo sapiens}; contains Pfam profile PF00956: Nucleosome assembly protein (NAP)	2.28197	2.54219	2.41208	32.4782
CATMA5a37190	AT5G41590	AT5G41590.1	expressed protein, contains Pfam profile PF04525: Protein of unknown function (DUF567)	2.1311	2.17566	2.15338	32.4012
CATMA3a18390	AT3G18773	AT3G18773.1	zinc finger (C3HC4-type RING finger) family protein, contains Pfam profile: PF00097 zinc finger, C3HC4 type (RING finger)	4.19872	4.19245	4.19559	31.5506
CATMA5a07985	AT5G08640	AT5G08640.1	flavonol synthase 1 (FLS1), identical to SP|Q96330; contains PF03171 2OG-Fe(II) oxygenase superfamily	3.80287	6.57239	5.18763	31.1484

## Sheet: (H) AllData
CATMA ID	ras: CKX1 vs. BA0 root	ras: BA15 vs. BA0 root	ras: BA120 vs. BA0 root	ras: BA1080 vs. BA0 root	ras: CKX1 vs. BA0 shoot	ras: BA15 vs. BA0 shoot	ras: BA120 vs. BA0 shoot	ras: BA1080 vs. BA0 shoot	ras: FDR cytokinin effect	ras: AGI	ras: genename	ras: description	ahk: BA15 vs. BA0	ahk: BA120 vs. BA0	ahk: pval cytokinin effect	ahk: FDR cytokinin effect	ahk: AGI	ahk: genename	ahk: description	arr1: Ratio BA15 vs. BA0	arr1: Ratio BA120 vs. BA0	arr1: pval cytokinin effect	arr1: FDR cytokinin effect	arr1: AGI	arr1: genename	arr1: description	tup3: BA15 vs. BA0	tup3: BA120 vs. BA0	tup3: pval cytokinin effect	tup3: FDR cytokinin effect	tup3: AGI	tup3: genename	tup3: description	AGI	genename	description	Mean Ratio BA15 vs. BA0	Mean Ratio BA120 vs. BA0	Mean Ratio BAx vs. BA0	Meta Statistics
CATMA5a58475	0.122853	1.6247	2.35162	1.72925	0.262008	1.27574	1.71667	0.964065	1.1508e-09	AT5G62920	ARR6	Encodes a Type-A response regulator that is responsive to cytokinin treatment. Its C-ter domain is very short in comparison to other Arabidopsis ARRs (17 total).	3.84245	2.85656	8.76479e-18	1.05922e-13	AT5G62920	ARR6	Encodes a Type-A response regulator that is responsive to cytokinin treatment. Its C-ter domain is very short in comparison to other Arabidopsis ARRs (17 total).	10.6724	6.8373	1.54332e-19	1.0091e-15	AT5G62920	ARR6	Encodes a Type-A response regulator that is responsive to cytokinin treatment. Its C-ter domain is very short in comparison to other Arabidopsis ARRs (17 total).	6.71404	1.66117	0.000219432	0.00675909	AT5G62920	ARR6	Encodes a Type-A response regulator that is responsive to cytokinin treatment. Its C-ter domain is very short in comparison to other Arabidopsis ARRs (17 total).	AT5G62920	ARR6	Encodes a Type-A response regulator that is responsive to cytokinin treatment. Its C-ter domain is very short in comparison to other Arabidopsis ARRs (17 total).	4.82586	3.08467	3.95527	129.822
CATMA5a05050	0.402721	0.978858	1.22761	1.67206	0.401496	1.00273	1.19015	2.09937	2.05208e-10	AT5G05860	AT5G05860.1	UDP-glucoronosyl/UDP-glucosyl transferase family protein, contains Pfam profile: PF00201 UDP-glucoronosyl and UDP-glucosyl transferase	1.76219	4.51026	3.32932e-16	1.00587e-12	AT5G05860	AT5G05860.1	UDP-glucoronosyl/UDP-glucosyl transferase family protein, contains Pfam profile: PF00201 UDP-glucoronosyl and UDP-glucosyl transferase	1.78848	4.10332	7.97077e-15	6.1314e-12	AT5G05860	AT5G05860.1	UDP-glucoronosyl/UDP-glucosyl transferase family protein, contains Pfam profile: PF00201 UDP-glucoronosyl and UDP-glucosyl transferase	1.18756	3.319	6.00154e-05	0.00348623	AT5G05860	AT5G05860.1	UDP-glucoronosyl/UDP-glucosyl transferase family protein, contains Pfam profile: PF00201 UDP-glucoronosyl and UDP-glucosyl transferase	AT5G05860	AT5G05860.1	UDP-glucoronosyl/UDP-glucosyl transferase family protein, contains Pfam profile: PF00201 UDP-glucoronosyl and UDP-glucosyl transferase	1.34396	2.87006	2.10701	117.448
CATMA5a43410	0.747758	0.483879	0.184669	0.00469073	17.1487	2.49555	0.8278	0.0718773	4.94778e-09	AT5G47450	AT5G47450.1	major intrinsic family protein / MIP family protein, contains Pfam profile: MIP PF00230	1.1249	0.087912	9.62548e-12	4.05672e-09	AT5G47450	AT5G47450.1	major intrinsic family protein / MIP family protein, contains Pfam profile: MIP PF00230	1.153	0.242266	5.74771e-16	8.35142e-13	AT5G47450	AT5G47450.1	major intrinsic family protein / MIP family protein, contains Pfam profile: MIP PF00230	0.325731	0.0472434	9.71467e-11	1.34956e-06	AT5G47450	AT5G47450.1	major intrinsic family protein / MIP family protein, contains Pfam profile: MIP PF00230	AT5G47450	AT5G47450.1	major intrinsic family protein / MIP family protein, contains Pfam profile: MIP PF00230	1.11661	0.277978	0.697295	115.09
CATMA3a00185	0.471507	0.673028	0.271666	0.0797683	12.1363	1.22221	0.68438	0.798418	1.48737e-08	AT3G01190	AT3G01190.1	peroxidase 27 (PER27) (P27) (PRXR7), identical to SP|Q43735 Peroxidase 27 precursor (EC 1.11.1.7) (Atperox P27) (PRXR7) (ATP12a) {Arabidopsis thaliana}	0.8049	0.169198	3.63909e-12	1.99902e-09	AT3G01190	AT3G01190.1	peroxidase 27 (PER27) (P27) (PRXR7), identical to SP|Q43735 Peroxidase 27 precursor (EC 1.11.1.7) (Atperox P27) (PRXR7) (ATP12a) {Arabidopsis thaliana}	0.802705	0.220046	6.48026e-16	8.47423e-13	AT3G01190	AT3G01190.1	peroxidase 27 (PER27) (P27) (PRXR7), identical to SP|Q43735 Peroxidase 27 precursor (EC 1.11.1.7) (Atperox P27) (PRXR7) (ATP12a) {Arabidopsis thaliana}	0.60989	0.0263634	7.72756e-07	0.000298198	AT3G01190	AT3G01190.1	peroxidase 27 (PER27) (P27) (PRXR7), identical to SP|Q43735 Peroxidase 27 precursor (EC 1.11.1.7) (Atperox P27) (PRXR7) (ATP12a) {Arabidopsis thaliana}	AT3G01190	AT3G01190.1	peroxidase 27 (PER27) (P27) (PRXR7), identical to SP|Q43735 Peroxidase 27 precursor (EC 1.11.1.7) (Atperox P27) (PRXR7) (ATP12a) {Arabidopsis thaliana}	0.822546	0.274331	0.548438	106.714
CATMA1a09322	0.206077	0.644878	2.5294	2.09695	0.271506	0.928399	1.19959	1.61338	7.71269e-09	AT1G10470	ARR4	ARR4 mRNA for response regulator 4 and response regulator 1, complete cds, two-component response regulator homolog (IBC7)	1.11378	2.93439	2.09455e-16	8.43753e-13	AT1G10470	ARR4	ARR4 mRNA for response regulator 4 and response regulator 1, complete cds, two-component response regulator homolog (IBC7)	2.06789	3.02239	7.81381e-13	3.52349e-10	AT1G10470	ARR4	ARR4 mRNA for response regulator 4 and response regulator 1, complete cds, two-component response regulator homolog (IBC7)	1.14899	1.99801	0.0396715	0.132353	AT1G10470	ARR4	ARR4 mRNA for response regulator 4 and response regulator 1, complete cds, two-component response regulator homolog (IBC7)	AT1G10470	ARR4	ARR4 mRNA for response regulator 4 and response regulator 1, complete cds, two-component response regulator homolog (IBC7)	1.18079	2.33675	1.75877	101.378
CATMA3a37230	0.156214	0.770612	0.901956	1.37722	8.46971	2.00468	1.78363	2.0569	0.879119	NA	NA	NA	3.35015	2.85214	1.56772e-14	2.1051e-11	NA	NA	NA	4.09584	2.84517	4.25093e-18	1.11179e-14	NA	NA	NA	1.99499	3.73624	3.26904e-07	0.000227068	NA	NA	NA	NA	CATMA3a37230	NA	2.44325	2.42383	2.43354	94.1119
CATMA3a29390	0.50259	0.889381	4.13359	3.36287	2.5074	1.62737	0.874726	1.04821	0.291196	AT3G29250	AT3G29250.1	short-chain dehydrogenase/reductase (SDR) family protein, similar to 3-beta-hydroxysteroiddehydrogenase GI:15983819 from (Digitalis lanata); contains Pfam profile: PF00106 short chain dehydrogenase	1.10542	5.45598	5.64956e-16	1.3655e-12	AT3G29250	AT3G29250.1	short-chain dehydrogenase/reductase (SDR) family protein, similar to 3-beta-hydroxysteroiddehydrogenase GI:15983819 from (Digitalis lanata); contains Pfam profile: PF00106 short chain dehydrogenase	0.723322	2.53872	4.92622e-15	4.02626e-12	AT3G29250	AT3G29250.1	short-chain dehydrogenase/reductase (SDR) family protein, similar to 3-beta-hydroxysteroiddehydrogenase GI:15983819 from (Digitalis lanata); contains Pfam profile: PF00106 short chain dehydrogenase	1.93178	6.513	3.23246e-08	6.41505e-05	AT3G29250	AT3G29250.1	short-chain dehydrogenase/reductase (SDR) family protein, similar to 3-beta-hydroxysteroiddehydrogenase GI:15983819 from (Digitalis lanata); contains Pfam profile: PF00106 short chain dehydrogenase	AT3G29250	AT3G29250.1	short-chain dehydrogenase/reductase (SDR) family protein, similar to 3-beta-hydroxysteroiddehydrogenase GI:15983819 from (Digitalis lanata); contains Pfam profile: PF00106 short chain dehydrogenase	1.25546	3.9032	2.57933	92.9755
CATMA4a31370	0.0883835	0.42827	4.29649	2.88311	0.828797	1.20259	1.89946	4.44472	1.27384e-06	AT4G29740	AT4G29740.1	FAD-binding domain-containing protein / cytokinin oxidase family protein, similar to cytokinin oxidase, Zea mays (gi:3882018) (gi:3441978)	1.20927	5.85231	7.70502e-07	6.42174e-05	AT4G29740	AT4G29740.1	FAD-binding domain-containing protein / cytokinin oxidase family protein, similar to cytokinin oxidase, Zea mays (gi:3882018) (gi:3441978)	32.5452	15.9455	9.98266e-17	1.8649e-13	AT4G29740	AT4G29740.1	FAD-binding domain-containing protein / cytokinin oxidase family protein, similar to cytokinin oxidase, Zea mays (gi:3882018) (gi:3441978)	2.59863	3.47277	2.5234e-06	0.000637364	AT4G29740	AT4G29740.1	FAD-binding domain-containing protein / cytokinin oxidase family protein, similar to cytokinin oxidase, Zea mays (gi:3882018) (gi:3441978)	AT4G29740	AT4G29740.1	FAD-binding domain-containing protein / cytokinin oxidase family protein, similar to cytokinin oxidase, Zea mays (gi:3882018) (gi:3441978)	7.59679	6.29332	6.94505	86.4106
CATMA5a43205	0.686844	0.597443	0.442406	0.109223	0.0983151	0.476505	0.177439	0.0734181	4.48485e-08	AT5G47220	AT5G47220.1	Encodes a member of the ERF (ethylene response factor) subfamily B-3 of ERF/AP2 transcription factor family (ATERF-2). The protein contains one AP2 domain. Functions as activator of GCC boxûdependent transcription. Positive regulator of JA-responsive	0.555054	0.199081	7.47097e-15	1.12858e-11	AT5G47220	AT5G47220.1	Encodes a member of the ERF (ethylene response factor) subfamily B-3 of ERF/AP2 transcription factor family (ATERF-2). The protein contains one AP2 domain. Functions as activator of GCC boxûdependent transcription. Positive regulator of JA-responsive	1.92359	0.149592	6.78293e-09	5.96083e-07	AT5G47220	AT5G47220.1	Encodes a member of the ERF (ethylene response factor) subfamily B-3 of ERF/AP2 transcription factor family (ATERF-2). The protein contains one AP2 domain. Functions as activator of GCC boxûdependent transcription. Positive regulator of JA-responsive	0.664574	0.274058	0.00793523	0.0506943	AT5G47220	AT5G47220.1	Encodes a member of the ERF (ethylene response factor) subfamily B-3 of ERF/AP2 transcription factor family (ATERF-2). The protein contains one AP2 domain. Functions as activator of GCC boxûdependent transcription. Positive regulator of JA-responsive	AT5G47220	AT5G47220.1	Encodes a member of the ERF (ethylene response factor) subfamily B-3 of ERF/AP2 transcription factor family (ATERF-2). The protein contains one AP2 domain. Functions as activator of GCC boxûdependent transcription. Positive regulator of JA-responsive	0.843433	0.248515	0.545974	85.7571
CATMA5a47710	0.145511	0.473885	1.64568	2.30034	0.964322	0.792686	1.59465	1.69672	0.000671379	AT5G51780	AT5G51780.1	basix helix-loop-helix (bHLH) family protein, contains Pfam profile: PF00010 helix-loop-helix DNA-binding domain	1.82688	3.17194	5.17354e-14	4.8094e-11	AT5G51780	AT5G51780.1	basix helix-loop-helix (bHLH) family protein, contains Pfam profile: PF00010 helix-loop-helix DNA-binding domain	1.72929	3.56156	2.91503e-13	1.46615e-10	AT5G51780	AT5G51780.1	basix helix-loop-helix (bHLH) family protein, contains Pfam profile: PF00010 helix-loop-helix DNA-binding domain	1.49501	1.79665	5.59153e-05	0.00337515	AT5G51780	AT5G51780.1	basix helix-loop-helix (bHLH) family protein, contains Pfam profile: PF00010 helix-loop-helix DNA-binding domain	AT5G51780	AT5G51780.1	basix helix-loop-helix (bHLH) family protein, contains Pfam profile: PF00010 helix-loop-helix DNA-binding domain	1.26355	2.3541	1.80882	85.694
CATMA1a18090	0.305163	4.53408	14.4753	0.966224	0.627314	2.57061	9.2291	2.06697	1.48737e-08	AT1G19050	ARR7	ARR7 mRNA for response regulator 7, complete cds	5.5617	4.66655	8.4511e-10	1.89133e-07	AT1G19050	ARR7	ARR7 mRNA for response regulator 7, complete cds	21.1644	10.8148	8.42597e-12	2.56247e-09	AT1G19050	ARR7	ARR7 mRNA for response regulator 7, complete cds	24.7835	5.51568	5.45363e-05	0.00337515	AT1G19050	ARR7	ARR7 mRNA for response regulator 7, complete cds	AT1G19050	ARR7	ARR7 mRNA for response regulator 7, complete cds	11.7229	8.94027	10.3316	85.0874
CATMA5a43220	0.261872	0.867504	0.250413	0.111481	0.480023	0.976557	0.557129	0.537304	1.19663e-05	AT5G47240	AT5G47240.1	MutT/nudix family protein, similar to SP|P53370 Nucleoside diphosphate-linked moiety X motif 6 {Homo sapiens}; contains Pfam profile PF00293: NUDIX domain	0.676581	0.392073	9.73477e-12	4.05672e-09	AT5G47240	AT5G47240.1	MutT/nudix family protein, similar to SP|P53370 Nucleoside diphosphate-linked moiety X motif 6 {Homo sapiens}; contains Pfam profile PF00293: NUDIX domain	1.14055	0.72751	6.99593e-11	1.60501e-08	AT5G47240	AT5G47240.1	MutT/nudix family protein, similar to SP|P53370 Nucleoside diphosphate-linked moiety X motif 6 {Homo sapiens}; contains Pfam profile PF00293: NUDIX domain	1.88331	0.427899	3.75692e-06	0.000768821	AT5G47240	AT5G47240.1	MutT/nudix family protein, similar to SP|P53370 Nucleoside diphosphate-linked moiety X motif 6 {Homo sapiens}; contains Pfam profile PF00293: NUDIX domain	AT5G47240	AT5G47240.1	MutT/nudix family protein, similar to SP|P53370 Nucleoside diphosphate-linked moiety X motif 6 {Homo sapiens}; contains Pfam profile PF00293: NUDIX domain	1.1089	0.471005	0.789952	80.4656
CATMA5a43950	0.34692	1.61055	6.17905	14.3562	0.818285	0.465087	0.558562	2.00489	0.00291574	AT5G47980	AT5G47980.1	transferase family protein, similar to alcohol acyltransferase (Fragaria x ananassa)(GI:10121328)(PMID:10810141), deacetylvindoline 4-O-acetyltransferase (Catharanthus roseus)(GI:4091808)(PMID:9681034)	1.51799	16.548	2.2545e-13	1.93707e-10	AT5G47980	AT5G47980.1	transferase family protein, similar to alcohol acyltransferase (Fragaria x ananassa)(GI:10121328)(PMID:10810141), deacetylvindoline 4-O-acetyltransferase (Catharanthus roseus)(GI:4091808)(PMID:9681034)	4.11671	20.5152	1.75735e-12	6.21103e-10	AT5G47980	AT5G47980.1	transferase family protein, similar to alcohol acyltransferase (Fragaria x ananassa)(GI:10121328)(PMID:10810141), deacetylvindoline 4-O-acetyltransferase (Catharanthus roseus)(GI:4091808)(PMID:9681034)	2.30969	17.6482	2.07357e-05	0.00208514	AT5G47980	AT5G47980.1	transferase family protein, similar to alcohol acyltransferase (Fragaria x ananassa)(GI:10121328)(PMID:10810141), deacetylvindoline 4-O-acetyltransferase (Catharanthus roseus)(GI:4091808)(PMID:9681034)	AT5G47980	AT5G47980.1	transferase family protein, similar to alcohol acyltransferase (Fragaria x ananassa)(GI:10121328)(PMID:10810141), deacetylvindoline 4-O-acetyltransferase (Catharanthus roseus)(GI:4091808)(PMID:9681034)	2.00401	12.2898	7.1469	80.1774
CATMA1a62940	4.87913	1.84846	0.515103	0.540885	36.5877	3.11142	2.77355	2.62231	3.05374e-11	AT1G73620	AT1G73620.1	thaumatin-like protein, putative / pathogenesis-related protein, putative, strong similarity to SP|P50699 Thaumatin-like protein precursor {Arabidopsis thaliana}, pathogenesis-related group 5 protein (Brassica rapa) GI:2749943; contains Pfam profile:	1.63016	0.800592	6.96129e-08	8.41272e-06	AT1G73620	AT1G73620.1	thaumatin-like protein, putative / pathogenesis-related protein, putative, strong similarity to SP|P50699 Thaumatin-like protein precursor {Arabidopsis thaliana}, pathogenesis-related group 5 protein (Brassica rapa) GI:2749943; contains Pfam profile:	1.72499	1.02525	1.16958e-09	1.62708e-07	AT1G73620	AT1G73620.1	thaumatin-like protein, putative / pathogenesis-related protein, putative, strong similarity to SP|P50699 Thaumatin-like protein precursor {Arabidopsis thaliana}, pathogenesis-related group 5 protein (Brassica rapa) GI:2749943; contains Pfam profile:	0.684384	0.340735	0.00155042	0.0197027	AT1G73620	AT1G73620.1	thaumatin-like protein, putative / pathogenesis-related protein, putative, strong similarity to SP|P50699 Thaumatin-like protein precursor {Arabidopsis thaliana}, pathogenesis-related group 5 protein (Brassica rapa) GI:2749943; contains Pfam profile:	AT1G73620	AT1G73620.1	thaumatin-like protein, putative / pathogenesis-related protein, putative, strong similarity to SP|P50699 Thaumatin-like protein precursor {Arabidopsis thaliana}, pathogenesis-related group 5 protein (Brassica rapa) GI:2749943; contains Pfam profile:	1.79988	1.09105	1.44546	80.0063
CATMA5a43970	0.353749	0.880439	4.10604	14.5688	1.26229	0.270097	0.863232	0.860044	0.00016713	AT5G48000	AT5G48000.1	cytochrome P450 family protein, similar to steroid 22-alpha-hydroxylase; DWF4; CYP90B1 (GI:2935342) (Arabidopsis thaliana)	0.160303	3.75549	1.95402e-10	5.13356e-08	AT5G48000	AT5G48000.1	cytochrome P450 family protein, similar to steroid 22-alpha-hydroxylase; DWF4; CYP90B1 (GI:2935342) (Arabidopsis thaliana)	1.26902	5.64902	1.52456e-12	5.69621e-10	AT5G48000	AT5G48000.1	cytochrome P450 family protein, similar to steroid 22-alpha-hydroxylase; DWF4; CYP90B1 (GI:2935342) (Arabidopsis thaliana)	1.36127	5.46329	3.48069e-06	0.000768821	AT5G48000	AT5G48000.1	cytochrome P450 family protein, similar to steroid 22-alpha-hydroxylase; DWF4; CYP90B1 (GI:2935342) (Arabidopsis thaliana)	AT5G48000	AT5G48000.1	cytochrome P450 family protein, similar to steroid 22-alpha-hydroxylase; DWF4; CYP90B1 (GI:2935342) (Arabidopsis thaliana)	0.788227	3.96742	2.37782	77.8165
CATMA1a57750	1.53913	1.352	4.32198	11.2587	1.81646	1.33964	1.60103	2.76128	1.85453e-05	AT1G68360	AT1G68360.1	zinc finger protein-related, similar to zinc finger protein GI:790683 from (Arabidopsis thaliana)	1.24031	1.2877	0.000388071	0.00940436	AT1G68360	AT1G68360.1	zinc finger protein-related, similar to zinc finger protein GI:790683 from (Arabidopsis thaliana)	8.04507	3.72929	2.73784e-19	1.19342e-15	AT1G68360	AT1G68360.1	zinc finger protein-related, similar to zinc finger protein GI:790683 from (Arabidopsis thaliana)	3.1093	1.62397	0.00346116	0.0315709	AT1G68360	AT1G68360.1	zinc finger protein-related, similar to zinc finger protein GI:790683 from (Arabidopsis thaliana)	AT1G68360	AT1G68360.1	zinc finger protein-related, similar to zinc finger protein GI:790683 from (Arabidopsis thaliana)	3.01727	2.51279	2.76503	77.0101
CATMA5a17520	1.13159	1.10739	6.47184	3.47619	2.2715	2.75607	2.13512	1.16137	0.00335469	AT5G19110	AT5G19110.1	extracellular dermal glycoprotein-related / EDGP-related, similar to extracellular dermal glycoprotein EDGP precursor (Daucus carota) GI:285741	1.85702	4.64128	1.07008e-05	0.00053218	AT5G19110	AT5G19110.1	extracellular dermal glycoprotein-related / EDGP-related, similar to extracellular dermal glycoprotein EDGP precursor (Daucus carota) GI:285741	2.65488	7.07545	1.05234e-19	1.0091e-15	AT5G19110	AT5G19110.1	extracellular dermal glycoprotein-related / EDGP-related, similar to extracellular dermal glycoprotein EDGP precursor (Daucus carota) GI:285741	1.66034	2.09238	8.10468e-05	0.00396444	AT5G19110	AT5G19110.1	extracellular dermal glycoprotein-related / EDGP-related, similar to extracellular dermal glycoprotein EDGP precursor (Daucus carota) GI:285741	AT5G19110	AT5G19110.1	extracellular dermal glycoprotein-related / EDGP-related, similar to extracellular dermal glycoprotein EDGP precursor (Daucus carota) GI:285741	2.00714	4.48321	3.24518	76.8899
CATMA3a50000	1.23711	1.41485	7.99411	4.19013	9.12696	2.46515	4.27156	7.07097	0.000264507	AT3G57010	AT3G57010.1	strictosidine synthase family protein, similar to strictosidine synthase (Rauvolfia serpentina)(SP|P15324)	1.85172	3.80629	2.16068e-10	5.5557e-08	AT3G57010	AT3G57010.1	strictosidine synthase family protein, similar to strictosidine synthase (Rauvolfia serpentina)(SP|P15324)	0.532714	2.34523	1.17367e-11	3.48819e-09	AT3G57010	AT3G57010.1	strictosidine synthase family protein, similar to strictosidine synthase (Rauvolfia serpentina)(SP|P15324)	0.65413	3.59015	6.66784e-07	0.000280696	AT3G57010	AT3G57010.1	strictosidine synthase family protein, similar to strictosidine synthase (Rauvolfia serpentina)(SP|P15324)	AT3G57010	AT3G57010.1	strictosidine synthase family protein, similar to strictosidine synthase (Rauvolfia serpentina)(SP|P15324)	1.38371	4.40147	2.89259	75.8794
CATMA2a38980	0.750301	2.73193	12.3638	1.57998	2.04319	0.819588	4.92587	5.67512	0.0471424	AT2G40670	ARR16	response regulator 16	1.0168	3.16626	7.277e-08	8.62182e-06	AT2G40670	ARR16	response regulator 16	5.8233	12.6365	8.73526e-17	1.8649e-13	AT2G40670	ARR16	response regulator 16	1.56279	4.45878	6.08355e-07	0.000272621	AT2G40670	ARR16	response regulator 16	AT2G40670	ARR16	response regulator 16	2.39088	7.51023	4.95055	75.3572
CATMA1a64720	0.568428	0.768027	0.394181	0.825402	0.430867	0.528512	0.293466	0.381539	5.23344e-05	AT1G75380	AT1G75380.1	wound-responsive protein-related, similar to wound inducive gene GI:8096273 from (Nicotiana tabacum)	0.836633	0.237615	1.9299e-12	1.16614e-09	AT1G75380	AT1G75380.1	wound-responsive protein-related, similar to wound inducive gene GI:8096273 from (Nicotiana tabacum)	0.788047	0.92299	2.60314e-07	1.19864e-05	AT1G75380	AT1G75380.1	wound-responsive protein-related, similar to wound inducive gene GI:8096273 from (Nicotiana tabacum)	1.14186	0.329002	2.53296e-07	0.000193201	AT1G75380	AT1G75380.1	wound-responsive protein-related, similar to wound inducive gene GI:8096273 from (Nicotiana tabacum)	AT1G75380	AT1G75380.1	wound-responsive protein-related, similar to wound inducive gene GI:8096273 from (Nicotiana tabacum)	0.812615	0.435451	0.624033	72.5833
CATMA5a38710	0.200715	0.797438	0.649033	0.479276	0.0413623	0.672492	0.224499	0.208996	1.42745e-06	AT5G42900	AT5G42900.1	expressed protein, similar to unknown protein (pir||T05226)	1.6715	0.524661	0.000483104	0.0110994	AT5G42900	AT5G42900.1	expressed protein, similar to unknown protein (pir||T05226)	1.03413	1.64496	4.42138e-15	3.85456e-12	AT5G42900	AT5G42900.1	expressed protein, similar to unknown protein (pir||T05226)	8.85576	0.187658	5.45236e-05	0.00337515	AT5G42900	AT5G42900.1	expressed protein, similar to unknown protein (pir||T05226)	AT5G42900	AT5G42900.1	expressed protein, similar to unknown protein (pir||T05226)	2.60627	0.646161	1.62621	72.0389
CATMA1a02710	0.253127	0.993653	0.450003	1.01965	0.380103	1.23507	0.65618	0.83982	4.66767e-05	AT1G03850	AT1G03850.1	glutaredoxin family protein, contains INTERPRO Domain IPR002109, Glutaredoxin (thioltransferase)	1.40947	0.520899	1.1081e-12	7.43965e-10	AT1G03850	AT1G03850.1	glutaredoxin family protein, contains INTERPRO Domain IPR002109, Glutaredoxin (thioltransferase)	2.29084	1.41778	4.6542e-07	1.89604e-05	AT1G03850	AT1G03850.1	glutaredoxin family protein, contains INTERPRO Domain IPR002109, Glutaredoxin (thioltransferase)	2.01661	0.934985	9.21479e-07	0.000345978	AT1G03850	AT1G03850.1	glutaredoxin family protein, contains INTERPRO Domain IPR002109, Glutaredoxin (thioltransferase)	AT1G03850	AT1G03850.1	glutaredoxin family protein, contains INTERPRO Domain IPR002109, Glutaredoxin (thioltransferase)	1.58913	0.79597	1.19255	71.8947
CATMA1a12420	0.481645	0.67832	15.4791	1.41084	5.42843	1.81645	0.591404	1.00169	0.216686	AT1G13420	AT1G13420.1	sulfotransferase family protein, similar to steroid sulfotransferase 1 GI:3420004 from (Brassica napus); contains Pfam profile PF00685: Sulfotransferase domain	0.714209	6.8891	4.99002e-12	2.41218e-09	AT1G13420	AT1G13420.1	sulfotransferase family protein, similar to steroid sulfotransferase 1 GI:3420004 from (Brassica napus); contains Pfam profile PF00685: Sulfotransferase domain	0.818809	6.16464	1.61923e-12	5.88186e-10	AT1G13420	AT1G13420.1	sulfotransferase family protein, similar to steroid sulfotransferase 1 GI:3420004 from (Brassica napus); contains Pfam profile PF00685: Sulfotransferase domain	1.39655	4.56846	7.1381e-06	0.00111418	AT1G13420	AT1G13420.1	sulfotransferase family protein, similar to steroid sulfotransferase 1 GI:3420004 from (Brassica napus); contains Pfam profile PF00685: Sulfotransferase domain	AT1G13420	AT1G13420.1	sulfotransferase family protein, similar to steroid sulfotransferase 1 GI:3420004 from (Brassica napus); contains Pfam profile PF00685: Sulfotransferase domain	1.08487	6.73854	3.9117	71.3061
CATMA3a16130	0.560774	0.658208	0.556224	0.827836	0.0643041	0.571876	0.181636	0.141337	7.07224e-07	AT3G16720	AT3G16720.1	zinc finger (C3HC4-type RING finger) family protein, contains Pfam domain, PF00097: Zinc finger, C3HC4 type (RING finger)	0.817973	0.244415	1.97847e-16	8.43753e-13	AT3G16720	AT3G16720.1	zinc finger (C3HC4-type RING finger) family protein, contains Pfam domain, PF00097: Zinc finger, C3HC4 type (RING finger)	3.91837	0.841675	0.0349293	0.0948985	AT3G16720	AT3G16720.1	zinc finger (C3HC4-type RING finger) family protein, contains Pfam domain, PF00097: Zinc finger, C3HC4 type (RING finger)	0.530078	0.174572	0.000266558	0.00750021	AT3G16720	AT3G16720.1	zinc finger (C3HC4-type RING finger) family protein, contains Pfam domain, PF00097: Zinc finger, C3HC4 type (RING finger)	AT3G16720	AT3G16720.1	zinc finger (C3HC4-type RING finger) family protein, contains Pfam domain, PF00097: Zinc finger, C3HC4 type (RING finger)	1.2993	0.399705	0.849503	70.9959
CATMA5a08270	2.11103	1.20322	0.287786	0.950551	0.645486	1.02872	0.968258	0.233872	0.000207103	AT5G09440	AT5G09440.1	phosphate-responsive protein, putative, similar to phi-1 (phosphate-induced gene) (Nicotiana tabacum) GI:3759184; contains Pfam profile PF04674: Phosphate-induced protein 1 conserved region	0.774046	0.339144	2.03131e-12	1.16897e-09	AT5G09440	AT5G09440.1	phosphate-responsive protein, putative, similar to phi-1 (phosphate-induced gene) (Nicotiana tabacum) GI:3759184; contains Pfam profile PF04674: Phosphate-induced protein 1 conserved region	0.933184	0.594261	4.04987e-07	1.70839e-05	AT5G09440	AT5G09440.1	phosphate-responsive protein, putative, similar to phi-1 (phosphate-induced gene) (Nicotiana tabacum) GI:3759184; contains Pfam profile PF04674: Phosphate-induced protein 1 conserved region	1.0005	0.193787	1.01288e-07	0.000137606	AT5G09440	AT5G09440.1	phosphate-responsive protein, putative, similar to phi-1 (phosphate-induced gene) (Nicotiana tabacum) GI:3759184; contains Pfam profile PF04674: Phosphate-induced protein 1 conserved region	AT5G09440	AT5G09440.1	phosphate-responsive protein, putative, similar to phi-1 (phosphate-induced gene) (Nicotiana tabacum) GI:3759184; contains Pfam profile PF04674: Phosphate-induced protein 1 conserved region	0.987933	0.476647	0.73229	70.5736
CATMA2a39370	0.477121	0.611831	0.0623536	0.458083	0.122953	0.43571	0.275018	0.277378	4.94591e-08	AT2G41010	AT2G41010.1	VQ motif-containing protein, contains PF05678: VQ motif	0.859362	0.499064	1.84871e-08	2.7246e-06	AT2G41010	AT2G41010.1	VQ motif-containing protein, contains PF05678: VQ motif	4.53631	0.728222	1.27665e-09	1.73904e-07	AT2G41010	AT2G41010.1	VQ motif-containing protein, contains PF05678: VQ motif	0.550749	0.201969	0.00466543	0.0381487	AT2G41010	AT2G41010.1	VQ motif-containing protein, contains PF05678: VQ motif	AT2G41010	AT2G41010.1	VQ motif-containing protein, contains PF05678: VQ motif	1.39879	0.353325	0.876059	69.9221
CATMA3a15410	0.597667	0.891073	19.4709	3.1556	4.55354	1.48458	1.33583	0.673215	0.00114681	AT3G15990	AT3G15990.1	sulfate transporter, putative, similar to sulfate transporter (Arabidopsis thaliana) GI:2285885; contains Pfam profiles PF00916: Sulfate transporter family, PF01740: STAS domain	1.98342	3.10754	1.45154e-06	0.000105674	AT3G15990	AT3G15990.1	sulfate transporter, putative, similar to sulfate transporter (Arabidopsis thaliana) GI:2285885; contains Pfam profiles PF00916: Sulfate transporter family, PF01740: STAS domain	4.02672	6.6637	3.8845e-14	2.67356e-11	AT3G15990	AT3G15990.1	sulfate transporter, putative, similar to sulfate transporter (Arabidopsis thaliana) GI:2285885; contains Pfam profiles PF00916: Sulfate transporter family, PF01740: STAS domain	1.17877	3.09165	6.38556e-07	0.000277213	AT3G15990	AT3G15990.1	sulfate transporter, putative, similar to sulfate transporter (Arabidopsis thaliana) GI:2285885; contains Pfam profiles PF00916: Sulfate transporter family, PF01740: STAS domain	AT3G15990	AT3G15990.1	sulfate transporter, putative, similar to sulfate transporter (Arabidopsis thaliana) GI:2285885; contains Pfam profiles PF00916: Sulfate transporter family, PF01740: STAS domain	1.91291	6.73393	4.32342	69.9154
CATMA1a67645	3.4388	2.09249	2.16819	1.5036	2.95215	0.811835	1.89214	2.2611	0.000135803	AT1G78570	AT1G78570.1	NAD-dependent epimerase/dehydratase family protein, similar to dTDP-glucose 4,6-dehydratase from Aneurinibacillus thermoaerophilus GI:16357461, RmlB from Leptospira borgpetersenii GI:4234803; contains Pfam profile PF01370 NAD dependent epimerase/dehy	1.55863	2.72352	1.91749e-05	0.00087116	AT1G78570	AT1G78570.1	NAD-dependent epimerase/dehydratase family protein, similar to dTDP-glucose 4,6-dehydratase from Aneurinibacillus thermoaerophilus GI:16357461, RmlB from Leptospira borgpetersenii GI:4234803; contains Pfam profile PF01370 NAD dependent epimerase/dehy	1.84019	4.03068	8.10212e-16	8.71201e-13	AT1G78570	AT1G78570.1	NAD-dependent epimerase/dehydratase family protein, similar to dTDP-glucose 4,6-dehydratase from Aneurinibacillus thermoaerophilus GI:16357461, RmlB from Leptospira borgpetersenii GI:4234803; contains Pfam profile PF01370 NAD dependent epimerase/dehy	0.694265	1.86849	0.000363624	0.00874114	AT1G78570	AT1G78570.1	NAD-dependent epimerase/dehydratase family protein, similar to dTDP-glucose 4,6-dehydratase from Aneurinibacillus thermoaerophilus GI:16357461, RmlB from Leptospira borgpetersenii GI:4234803; contains Pfam profile PF01370 NAD dependent epimerase/dehy	AT1G78570	AT1G78570.1	NAD-dependent epimerase/dehydratase family protein, similar to dTDP-glucose 4,6-dehydratase from Aneurinibacillus thermoaerophilus GI:16357461, RmlB from Leptospira borgpetersenii GI:4234803; contains Pfam profile PF01370 NAD dependent epimerase/dehy	1.39948	2.5366	1.96804	69.911
CATMA5a05530	0.279423	0.807269	0.392298	0.621411	0.0890655	0.696226	0.235972	0.265492	6.40579e-08	AT5G06320	AT5G06320.1	harpin-induced family protein / HIN1 family protein / harpin-responsive family protein / NDR1/HIN1-like protein 3, similar to harpin-induced protein hin1 (GI:1619321)(Nicotiana tabacum)	0.706478	0.331002	5.62407e-15	9.70955e-12	AT5G06320	AT5G06320.1	harpin-induced family protein / HIN1 family protein / harpin-responsive family protein / NDR1/HIN1-like protein 3, similar to harpin-induced protein hin1 (GI:1619321)(Nicotiana tabacum)	2.08742	0.648912	0.000519559	0.0043581	AT5G06320	AT5G06320.1	harpin-induced family protein / HIN1 family protein / harpin-responsive family protein / NDR1/HIN1-like protein 3, similar to harpin-induced protein hin1 (GI:1619321)(Nicotiana tabacum)	0.214288	0.274334	0.222376	0.374084	AT5G06320	AT5G06320.1	harpin-induced family protein / HIN1 family protein / harpin-responsive family protein / NDR1/HIN1-like protein 3, similar to harpin-induced protein hin1 (GI:1619321)(Nicotiana tabacum)	AT5G06320	AT5G06320.1	harpin-induced family protein / HIN1 family protein / harpin-responsive family protein / NDR1/HIN1-like protein 3, similar to harpin-induced protein hin1 (GI:1619321)(Nicotiana tabacum)	0.902336	0.376504	0.63942	69.7404
CATMA3a55720	0.712325	2.27245	1.2829	3.26599	0.136142	0.605174	0.198159	0.0947065	0.115057	AT3G62550	AT3G62550.1	universal stress protein (USP) family protein, similar to ER6 protein (Lycopersicon esculentum) GI:5669654; contains Pfam profile PF00582: universal stress protein family	1.03501	0.224669	2.58244e-09	4.87637e-07	AT3G62550	AT3G62550.1	universal stress protein (USP) family protein, similar to ER6 protein (Lycopersicon esculentum) GI:5669654; contains Pfam profile PF00582: universal stress protein family	0.630214	0.752979	1.8397e-14	1.33654e-11	AT3G62550	AT3G62550.1	universal stress protein (USP) family protein, similar to ER6 protein (Lycopersicon esculentum) GI:5669654; contains Pfam profile PF00582: universal stress protein family	2.57489	0.276996	0.000116769	0.00492484	AT3G62550	AT3G62550.1	universal stress protein (USP) family protein, similar to ER6 protein (Lycopersicon esculentum) GI:5669654; contains Pfam profile PF00582: universal stress protein family	AT3G62550	AT3G62550.1	universal stress protein (USP) family protein, similar to ER6 protein (Lycopersicon esculentum) GI:5669654; contains Pfam profile PF00582: universal stress protein family	1.42355	0.54714	0.985342	67.8757
CATMA1a16150	0.196595	0.529881	0.702735	0.48868	0.233946	0.577926	0.320862	0.327125	2.0384e-05	NA	NA	NA	0.856784	0.326778	2.54454e-11	9.6096e-09	NA	NA	NA	7.8768	1.2233	6.01966e-10	9.52983e-08	NA	NA	NA	1.08901	0.594537	0.111986	0.245071	NA	NA	NA	NA	CATMA1a16150	NA	2.18608	0.633642	1.40986	67.5668
CATMA4a33440	0.537535	0.924807	0.362139	0.28209	0.117199	0.556524	0.401687	0.477829	2.67802e-05	AT4G31800	AT4G31800.1	WRKY family transcription factor	1.13777	0.321657	7.06955e-11	2.13589e-08	AT4G31800	AT4G31800.1	WRKY family transcription factor	3.29025	0.807069	5.53451e-07	2.15401e-05	AT4G31800	AT4G31800.1	WRKY family transcription factor	1.28718	0.190281	1.43287e-06	0.000432726	AT4G31800	AT4G31800.1	WRKY family transcription factor	AT4G31800	AT4G31800.1	WRKY family transcription factor	1.43931	0.416567	0.927937	67.3459
CATMA4a31320	0.853048	2.11929	9.75162	1.56631	0.941626	2.7755	3.92502	1.982	0.000131056	AT4G29690	AT4G29690.1	type I phosphodiesterase/nucleotide pyrophosphatase family protein, similar to SP|P22413 Ectonucleotide pyrophosphatase/phosphodiesterase 1 (Plasma-cell membrane glycoprotein PC-1) (Includes: Alkaline phosphodiesterase I (EC 3.1.4.1); Nucleotide pyro	1.55233	4.65724	1.60221e-05	0.000747613	AT4G29690	AT4G29690.1	type I phosphodiesterase/nucleotide pyrophosphatase family protein, similar to SP|P22413 Ectonucleotide pyrophosphatase/phosphodiesterase 1 (Plasma-cell membrane glycoprotein PC-1) (Includes: Alkaline phosphodiesterase I (EC 3.1.4.1); Nucleotide pyro	2.27398	9.63295	9.46229e-14	5.8923e-11	AT4G29690	AT4G29690.1	type I phosphodiesterase/nucleotide pyrophosphatase family protein, similar to SP|P22413 Ectonucleotide pyrophosphatase/phosphodiesterase 1 (Plasma-cell membrane glycoprotein PC-1) (Includes: Alkaline phosphodiesterase I (EC 3.1.4.1); Nucleotide pyro	1.76047	5.83844	6.27123e-06	0.00104964	AT4G29690	AT4G29690.1	type I phosphodiesterase/nucleotide pyrophosphatase family protein, similar to SP|P22413 Ectonucleotide pyrophosphatase/phosphodiesterase 1 (Plasma-cell membrane glycoprotein PC-1) (Includes: Alkaline phosphodiesterase I (EC 3.1.4.1); Nucleotide pyro	AT4G29690	AT4G29690.1	type I phosphodiesterase/nucleotide pyrophosphatase family protein, similar to SP|P22413 Ectonucleotide pyrophosphatase/phosphodiesterase 1 (Plasma-cell membrane glycoprotein PC-1) (Includes: Alkaline phosphodiesterase I (EC 3.1.4.1); Nucleotide pyro	2.09631	6.76105	4.42868	67.1612
CATMA1a17615	0.458749	0.87734	0.574931	0.250564	0.678159	0.718999	0.424491	0.406056	0.0310789	AT1G18570	AT1G18570.1	myb family transcription factor (MYB51), contains PFAM profile: PF00249	0.719364	0.175926	1.21036e-15	2.43786e-12	AT1G18570	AT1G18570.1	myb family transcription factor (MYB51), contains PFAM profile: PF00249	5.48346	0.666137	1.87883e-07	9.03291e-06	AT1G18570	AT1G18570.1	myb family transcription factor (MYB51), contains PFAM profile: PF00249	1.37121	0.44087	0.000728517	0.013042	AT1G18570	AT1G18570.1	myb family transcription factor (MYB51), contains PFAM profile: PF00249	AT1G18570	AT1G18570.1	myb family transcription factor (MYB51), contains PFAM profile: PF00249	1.83408	0.456471	1.14527	66.6025
CATMA2a34420	0.322845	0.559749	0.279409	0.61383	0.0748167	0.603276	0.23714	0.19793	1.03546e-07	AT2G36220	AT2G36220.1	expressed protein	0.824262	0.310647	5.80228e-11	1.84528e-08	AT2G36220	AT2G36220.1	expressed protein	2.67851	0.701176	0.000178124	0.00193465	AT2G36220	AT2G36220.1	expressed protein	0.572341	0.18938	5.85841e-05	0.00344873	AT2G36220	AT2G36220.1	expressed protein	AT2G36220	AT2G36220.1	expressed protein	1.04763	0.34355	0.695589	66.0882
CATMA4a11410	0.231677	0.82738	0.240117	0.0840014	0.81818	0.888225	1.14016	0.973486	0.00274244	AT4G11280	ACS6	encodes a a member of the 1-aminocyclopropane-1-carboxylate (ACC) synthase (S-adenosyl-L-methionine methylthioadenosine-lyase, EC 4.4.1.14) gene family	0.659566	0.182904	2.62249e-14	2.88116e-11	AT4G11280	ACS6	encodes a a member of the 1-aminocyclopropane-1-carboxylate (ACC) synthase (S-adenosyl-L-methionine methylthioadenosine-lyase, EC 4.4.1.14) gene family	5.57812	0.158215	8.31696e-09	7.0624e-07	AT4G11280	ACS6	encodes a a member of the 1-aminocyclopropane-1-carboxylate (ACC) synthase (S-adenosyl-L-methionine methylthioadenosine-lyase, EC 4.4.1.14) gene family	0.942904	0.148893	0.165469	0.309923	AT4G11280	ACS6	encodes a a member of the 1-aminocyclopropane-1-carboxylate (ACC) synthase (S-adenosyl-L-methionine methylthioadenosine-lyase, EC 4.4.1.14) gene family	AT4G11280	ACS6	encodes a a member of the 1-aminocyclopropane-1-carboxylate (ACC) synthase (S-adenosyl-L-methionine methylthioadenosine-lyase, EC 4.4.1.14) gene family	1.77924	0.374057	1.07665	65.6482
CATMA5a22090	0.296561	1.2094	0.571983	1.36224	0.155165	0.735048	0.403093	0.429542	4.27842e-08	AT5G24490	AT5G24490.1	30S ribosomal protein, putative, similar to SP|P19954 Plastid-specific 30S ribosomal protein 1, chloroplast precursor (CS-S5) (CS5) (S22) (Ribosomal protein 1) (PSRP-1) {Spinacia oleracea}; contains Pfam profile PF02482: Sigma 54 modulation protein /	0.94516	0.606014	0.00139622	0.0236985	AT5G24490	AT5G24490.1	30S ribosomal protein, putative, similar to SP|P19954 Plastid-specific 30S ribosomal protein 1, chloroplast precursor (CS-S5) (CS5) (S22) (Ribosomal protein 1) (PSRP-1) {Spinacia oleracea}; contains Pfam profile PF02482: Sigma 54 modulation protein /	1.1334	1.01307	2.37631e-13	1.243e-10	AT5G24490	AT5G24490.1	30S ribosomal protein, putative, similar to SP|P19954 Plastid-specific 30S ribosomal protein 1, chloroplast precursor (CS-S5) (CS5) (S22) (Ribosomal protein 1) (PSRP-1) {Spinacia oleracea}; contains Pfam profile PF02482: Sigma 54 modulation protein /	1.49263	0.921876	0.0767174	0.195777	AT5G24490	AT5G24490.1	30S ribosomal protein, putative, similar to SP|P19954 Plastid-specific 30S ribosomal protein 1, chloroplast precursor (CS-S5) (CS5) (S22) (Ribosomal protein 1) (PSRP-1) {Spinacia oleracea}; contains Pfam profile PF02482: Sigma 54 modulation protein /	AT5G24490	AT5G24490.1	30S ribosomal protein, putative, similar to SP|P19954 Plastid-specific 30S ribosomal protein 1, chloroplast precursor (CS-S5) (CS5) (S22) (Ribosomal protein 1) (PSRP-1) {Spinacia oleracea}; contains Pfam profile PF02482: Sigma 54 modulation protein /	1.10313	0.703208	0.903168	65.1356
CATMA4a25570	1.61149	1.02197	0.822034	1.43709	0.615304	1.0153	2.18706	1.92191	0.254289	AT4G23750	AT4G23750.1	encodes a member of the ERF (ethylene response factor) subfamily B-5 of ERF/AP2 transcription factor family. The protein contains one AP2 domain. There are 7 members in this subfamily.	2.61811	5.91852	1.61024e-05	0.000748453	AT4G23750	AT4G23750.1	encodes a member of the ERF (ethylene response factor) subfamily B-5 of ERF/AP2 transcription factor family. The protein contains one AP2 domain. There are 7 members in this subfamily.	4.59327	1.89821	5.11305e-19	1.67158e-15	AT4G23750	AT4G23750.1	encodes a member of the ERF (ethylene response factor) subfamily B-5 of ERF/AP2 transcription factor family. The protein contains one AP2 domain. There are 7 members in this subfamily.	0.793874	2.08298	0.0266869	0.103326	AT4G23750	AT4G23750.1	encodes a member of the ERF (ethylene response factor) subfamily B-5 of ERF/AP2 transcription factor family. The protein contains one AP2 domain. There are 7 members in this subfamily.	AT4G23750	AT4G23750.1	encodes a member of the ERF (ethylene response factor) subfamily B-5 of ERF/AP2 transcription factor family. The protein contains one AP2 domain. There are 7 members in this subfamily.	2.00851	2.58176	2.29513	64.7217
CATMA5a09830	0.0810885	0.886451	0.066415	0.0538952	0.0935087	0.425181	0.230017	0.307872	3.01511e-13	AT5G11070	AT5G11070.1	expressed protein	1.29338	0.696308	0.000417223	0.00988656	AT5G11070	AT5G11070.1	expressed protein	1.22892	1.70436	3.90063e-05	0.000598692	AT5G11070	AT5G11070.1	expressed protein	1.07546	1.6468	0.00317678	0.0300625	AT5G11070	AT5G11070.1	expressed protein	AT5G11070	AT5G11070.1	expressed protein	0.98188	0.86878	0.92533	64.015
CATMA1a18050	0.0562196	0.241289	0.320305	0.298926	0.105213	0.342353	0.509061	0.653622	4.36335e-06	AT1G19020	AT1G19020.1	expressed protein	1.21843	0.652071	1.52186e-06	0.000109474	AT1G19020	AT1G19020.1	expressed protein	6.45942	1.62206	6.6656e-11	1.55654e-08	AT1G19020	AT1G19020.1	expressed protein	2.04649	0.344664	0.000288332	0.00784631	AT1G19020	AT1G19020.1	expressed protein	AT1G19020	AT1G19020.1	expressed protein	2.0616	0.689632	1.37561	63.8941
CATMA5a56580	0.17985	0.830655	2.39746	0.747692	11.6762	1.23148	4.74476	2.65633	0.0131429	AT5G60890	AT5G60890.1	receptor-like protein kinase (ATR1) (MYB34), identical to receptor-like protein kinase(ATR1) GI:3150037 from (Arabidopsis thaliana); contains PFAM profile: myb DNA binding domain PF00249; identical to cDNA putative transcription factor (MYB34) mRNA,	2.11138	2.53205	1.28923e-10	3.70962e-08	AT5G60890	AT5G60890.1	receptor-like protein kinase (ATR1) (MYB34), identical to receptor-like protein kinase(ATR1) GI:3150037 from (Arabidopsis thaliana); contains PFAM profile: myb DNA binding domain PF00249; identical to cDNA putative transcription factor (MYB34) mRNA,	2.42654	3.41532	3.16018e-10	5.76914e-08	AT5G60890	AT5G60890.1	receptor-like protein kinase (ATR1) (MYB34), identical to receptor-like protein kinase(ATR1) GI:3150037 from (Arabidopsis thaliana); contains PFAM profile: myb DNA binding domain PF00249; identical to cDNA putative transcription factor (MYB34) mRNA,	2.54063	3.12021	2.96322e-05	0.00247982	AT5G60890	AT5G60890.1	receptor-like protein kinase (ATR1) (MYB34), identical to receptor-like protein kinase(ATR1) GI:3150037 from (Arabidopsis thaliana); contains PFAM profile: myb DNA binding domain PF00249; identical to cDNA putative transcription factor (MYB34) mRNA,	AT5G60890	AT5G60890.1	receptor-like protein kinase (ATR1) (MYB34), identical to receptor-like protein kinase(ATR1) GI:3150037 from (Arabidopsis thaliana); contains PFAM profile: myb DNA binding domain PF00249; identical to cDNA putative transcription factor (MYB34) mRNA,	1.82814	3.24196	2.53505	63.6363
CATMA3a19200	0.673329	0.483639	0.319612	0.246066	1.28391	0.440174	0.168912	0.232417	2.38053e-07	AT3G19580	AT3G19580.1	zinc finger (C2H2 type) protein 2 (AZF2), identical to Cys2/His2-type zinc finger protein 2 (Arabidopsis thaliana) gi|6009885|dbj|BAA85107	0.672737	0.243195	6.94906e-09	1.13486e-06	AT3G19580	AT3G19580.1	zinc finger (C2H2 type) protein 2 (AZF2), identical to Cys2/His2-type zinc finger protein 2 (Arabidopsis thaliana) gi|6009885|dbj|BAA85107	4.10445	0.745089	2.03823e-07	9.69221e-06	AT3G19580	AT3G19580.1	zinc finger (C2H2 type) protein 2 (AZF2), identical to Cys2/His2-type zinc finger protein 2 (Arabidopsis thaliana) gi|6009885|dbj|BAA85107	0.741638	0.313016	0.00303572	0.0294294	AT3G19580	AT3G19580.1	zinc finger (C2H2 type) protein 2 (AZF2), identical to Cys2/His2-type zinc finger protein 2 (Arabidopsis thaliana) gi|6009885|dbj|BAA85107	AT3G19580	AT3G19580.1	zinc finger (C2H2 type) protein 2 (AZF2), identical to Cys2/His2-type zinc finger protein 2 (Arabidopsis thaliana) gi|6009885|dbj|BAA85107	1.28853	0.357965	0.823246	63.4926
CATMA3a29720	1.04731	1.09838	3.20695	1.96894	0.482774	0.713694	1.04975	1.07824	1.59244e-05	AT3G29575	AT3G29575.1	expressed protein	1.93053	2.89795	2.41852e-07	2.39573e-05	AT3G29575	AT3G29575.1	expressed protein	1.82774	2.59319	2.54337e-12	8.75255e-10	AT3G29575	AT3G29575.1	expressed protein	1.42185	1.78182	0.111682	0.244675	AT3G29575	AT3G29575.1	expressed protein	AT3G29575	AT3G29575.1	expressed protein	1.39844	2.30593	1.85219	63.4082
CATMA2a27835	10.0895	1.45481	11.931	1.68857	3.95365	1.71151	8.13278	3.82054	4.21183e-05	AT2G29450	AT2G29450.1	glutathione S-transferase (103-1A), identical to Swiss-Prot:P46421 glutathione S-transferase 103-1A (Arabidopsis thaliana)	1.1201	1.05542	0.0123706	0.10247	AT2G29450	AT2G29450.1	glutathione S-transferase (103-1A), identical to Swiss-Prot:P46421 glutathione S-transferase 103-1A (Arabidopsis thaliana)	1.16548	0.994031	3.42035e-16	5.591e-13	AT2G29450	AT2G29450.1	glutathione S-transferase (103-1A), identical to Swiss-Prot:P46421 glutathione S-transferase 103-1A (Arabidopsis thaliana)	0.929848	3.66483	0.00448984	0.0372598	AT2G29450	AT2G29450.1	glutathione S-transferase (103-1A), identical to Swiss-Prot:P46421 glutathione S-transferase 103-1A (Arabidopsis thaliana)	AT2G29450	AT2G29450.1	glutathione S-transferase (103-1A), identical to Swiss-Prot:P46421 glutathione S-transferase 103-1A (Arabidopsis thaliana)	1.27635	5.15561	3.21598	63.2701
CATMA1a16990	0.139855	0.553003	0.213083	0.485822	1.29452	1.03168	0.704113	0.805584	0.000196808	AT1G17990	AT1G17990.1	12-oxophytodienoate reductase, putative, similar to OPR1 (GI:3882355) and OPR2 (GI:3882356)	0.922686	0.242195	1.96235e-11	7.90499e-09	AT1G17990	AT1G17990.1	12-oxophytodienoate reductase, putative, similar to OPR1 (GI:3882355) and OPR2 (GI:3882356)	1.3603	0.534207	5.85432e-07	2.25832e-05	AT1G17990	AT1G17990.1	12-oxophytodienoate reductase, putative, similar to OPR1 (GI:3882355) and OPR2 (GI:3882356)	1.89714	0.443523	0.000180823	0.00617609	AT1G17990	AT1G17990.1	12-oxophytodienoate reductase, putative, similar to OPR1 (GI:3882355) and OPR2 (GI:3882356)	AT1G17990	AT1G17990.1	12-oxophytodienoate reductase, putative, similar to OPR1 (GI:3882355) and OPR2 (GI:3882356)	1.15296	0.427424	0.790193	61.999
CATMA1a46055	2.22315	1.25881	3.47747	3.65436	5.30859	1.07199	1.96667	2.57887	1.65026e-06	AT1G55020	AT1G55020.1	lipoxygenase (LOX1), identical to SP|Q06327	1.0525	2.31632	0.00221807	0.0325823	AT1G55020	AT1G55020.1	lipoxygenase (LOX1), identical to SP|Q06327	1.17607	1.98045	2.09504e-13	1.19117e-10	AT1G55020	AT1G55020.1	lipoxygenase (LOX1), identical to SP|Q06327	0.806795	1.4108	0.00631193	0.0446824	AT1G55020	AT1G55020.1	lipoxygenase (LOX1), identical to SP|Q06327	AT1G55020	AT1G55020.1	lipoxygenase (LOX1), identical to SP|Q06327	1.07323	2.23034	1.65179	61.5997
CATMA5a53400	0.749178	0.644294	0.227502	0.130603	1.23292	0.824042	0.684239	0.2094	1.70371e-09	AT5G57685	AT5G57685.1	expressed protein	1.04425	0.498275	1.12153e-06	8.74435e-05	AT5G57685	AT5G57685.1	expressed protein	0.476008	0.431688	1.31214e-05	0.000260377	AT5G57685	AT5G57685.1	expressed protein	0.88602	0.427663	0.000471743	0.00996249	AT5G57685	AT5G57685.1	expressed protein	AT5G57685	AT5G57685.1	expressed protein	0.774922	0.453873	0.614398	61.1664
CATMA1a59200	0.435484	0.846556	0.229404	0.637642	0.117127	0.771622	0.316116	0.248323	1.19663e-05	AT1G69890	AT1G69890.1	expressed protein, contains Pfam profile: PF04601 protein of unknown function (DUF569	0.869696	0.173122	4.85651e-12	2.41218e-09	AT1G69890	AT1G69890.1	expressed protein, contains Pfam profile: PF04601 protein of unknown function (DUF569	2.32228	0.914018	0.000134309	0.00156538	AT1G69890	AT1G69890.1	expressed protein, contains Pfam profile: PF04601 protein of unknown function (DUF569	1.02381	0.225743	0.000414549	0.00933143	AT1G69890	AT1G69890.1	expressed protein, contains Pfam profile: PF04601 protein of unknown function (DUF569	AT1G69890	AT1G69890.1	expressed protein, contains Pfam profile: PF04601 protein of unknown function (DUF569	1.16679	0.371681	0.769237	61.0406
CATMA5a09320	0.819738	1.11639	0.849723	0.373351	5.73296	1.40166	0.257911	0.241774	4.27842e-08	AT5G10580	AT5G10580.1	expressed protein, contains Pfam profile PF04654: Protein of unknown function, DUF599	0.627046	0.505869	0.00142251	0.0240434	AT5G10580	AT5G10580.1	expressed protein, contains Pfam profile PF04654: Protein of unknown function, DUF599	0.95064	0.405699	2.35588e-08	1.73078e-06	AT5G10580	AT5G10580.1	expressed protein, contains Pfam profile PF04654: Protein of unknown function, DUF599	0.542711	0.144903	4.19922e-07	0.000237191	AT5G10580	AT5G10580.1	expressed protein, contains Pfam profile PF04654: Protein of unknown function, DUF599	AT5G10580	AT5G10580.1	expressed protein, contains Pfam profile PF04654: Protein of unknown function, DUF599	0.927691	0.432821	0.680256	61.0384
CATMA5a38360	0.755756	0.767067	11.7339	1.73887	1.13607	0.357377	0.381163	0.535592	0.00103921	AT5G42590	AT5G42590.1	cytochrome P450 71A16, putative (CYP71A16), Identical to Cytochrome P450 71A16 (SP:Q9FH66) (Arabidopsis thaliana)	1.0634	2.36979	8.40901e-10	1.89133e-07	AT5G42590	AT5G42590.1	cytochrome P450 71A16, putative (CYP71A16), Identical to Cytochrome P450 71A16 (SP:Q9FH66) (Arabidopsis thaliana)	0.650351	2.42168	1.34833e-09	1.7992e-07	AT5G42590	AT5G42590.1	cytochrome P450 71A16, putative (CYP71A16), Identical to Cytochrome P450 71A16 (SP:Q9FH66) (Arabidopsis thaliana)	0.80074	2.58037	0.0010361	0.0157305	AT5G42590	AT5G42590.1	cytochrome P450 71A16, putative (CYP71A16), Identical to Cytochrome P450 71A16 (SP:Q9FH66) (Arabidopsis thaliana)	AT5G42590	AT5G42590.1	cytochrome P450 71A16, putative (CYP71A16), Identical to Cytochrome P450 71A16 (SP:Q9FH66) (Arabidopsis thaliana)	0.727786	3.89738	2.31258	60.6408
CATMA3a49870	0.759223	0.564652	0.255616	0.223954	0.256508	0.534181	0.272107	0.422881	3.34127e-07	AT3G56880	AT3G56880.1	VQ motif-containing protein, contains PF05678: VQ motif	0.92897	0.397968	2.32862e-09	4.46689e-07	AT3G56880	AT3G56880.1	VQ motif-containing protein, contains PF05678: VQ motif	6.4105	1.69743	8.12591e-05	0.00105909	AT3G56880	AT3G56880.1	VQ motif-containing protein, contains PF05678: VQ motif	0.539139	0.197713	6.9205e-05	0.00369768	AT3G56880	AT3G56880.1	VQ motif-containing protein, contains PF05678: VQ motif	AT3G56880	AT3G56880.1	VQ motif-containing protein, contains PF05678: VQ motif	1.79549	0.564168	1.17983	60.5695
CATMA3a42560	1.09164	1.39009	0.922381	0.488902	0.362306	0.756594	0.617585	0.312667	0.000446956	AT3G49530	AT3G49530.1	no apical meristem (NAM) family protein, contains Pfam PF02365: No apical meristem (NAM) domain; similar to NAC2 - Arabidopsis thaliana, EMBL:AF201456	1.09736	0.41043	1.34404e-10	3.77738e-08	AT3G49530	AT3G49530.1	no apical meristem (NAM) family protein, contains Pfam PF02365: No apical meristem (NAM) domain; similar to NAC2 - Arabidopsis thaliana, EMBL:AF201456	2.81878	0.995553	1.10762e-07	5.77066e-06	AT3G49530	AT3G49530.1	no apical meristem (NAM) family protein, contains Pfam PF02365: No apical meristem (NAM) domain; similar to NAC2 - Arabidopsis thaliana, EMBL:AF201456	1.27867	0.272023	0.000365049	0.00874355	AT3G49530	AT3G49530.1	no apical meristem (NAM) family protein, contains Pfam PF02365: No apical meristem (NAM) domain; similar to NAC2 - Arabidopsis thaliana, EMBL:AF201456	AT3G49530	AT3G49530.1	no apical meristem (NAM) family protein, contains Pfam PF02365: No apical meristem (NAM) domain; similar to NAC2 - Arabidopsis thaliana, EMBL:AF201456	1.4683	0.643594	1.05595	60.026
CATMA5a08890	1.42229	1.19497	0.206007	0.240693	32.7161	0.592171	0.300447	0.103418	2.22553e-10	AT5G10130	AT5G10130.1	pollen Ole e 1 allergen and extensin family protein, contains similarity to pollen specific protein C13 precursor (Zea mays) SWISS-PROT:P33050	1.22998	0.358118	0.000305227	0.00793261	AT5G10130	AT5G10130.1	pollen Ole e 1 allergen and extensin family protein, contains similarity to pollen specific protein C13 precursor (Zea mays) SWISS-PROT:P33050	2.44536	0.577046	5.38547e-06	0.000128786	AT5G10130	AT5G10130.1	pollen Ole e 1 allergen and extensin family protein, contains similarity to pollen specific protein C13 precursor (Zea mays) SWISS-PROT:P33050	0.485187	0.0608933	0.000254473	0.00733433	AT5G10130	AT5G10130.1	pollen Ole e 1 allergen and extensin family protein, contains similarity to pollen specific protein C13 precursor (Zea mays) SWISS-PROT:P33050	AT5G10130	AT5G10130.1	pollen Ole e 1 allergen and extensin family protein, contains similarity to pollen specific protein C13 precursor (Zea mays) SWISS-PROT:P33050	1.18953	0.300502	0.745018	59.057
CATMA3a36740	0.114631	0.212786	0.341009	0.679669	0.0170221	0.214008	0.0463548	0.0247213	1.24931e-06	AT3G43850	AT3G43850.1	expressed protein, similar to MTD1 (Medicago truncatula) GI:9294810	1.45039	0.113096	1.66228e-06	0.000118169	AT3G43850	AT3G43850.1	expressed protein, similar to MTD1 (Medicago truncatula) GI:9294810	1.32266	0.799507	1.25543e-08	1.00719e-06	AT3G43850	AT3G43850.1	expressed protein, similar to MTD1 (Medicago truncatula) GI:9294810	0.657444	0.36105	0.00190094	0.021897	AT3G43850	AT3G43850.1	expressed protein, similar to MTD1 (Medicago truncatula) GI:9294810	AT3G43850	AT3G43850.1	expressed protein, similar to MTD1 (Medicago truncatula) GI:9294810	0.771457	0.332203	0.55183	58.0916
CATMA1a26550	0.363113	0.714229	0.190513	0.0923356	0.236309	0.699759	0.222706	0.118997	5.85819e-07	AT1G28370	AT1G28370.1	encodes a member of the ERF (ethylene response factor) subfamily B-1 of ERF/AP2 transcription factor family. The protein contains one AP2 domain. There are 15 members in this subfamily including ATERF-3, ATERF-4, ATERF-7, and leafy petiole.	1.13031	0.512476	3.98354e-07	3.73187e-05	AT1G28370	AT1G28370.1	encodes a member of the ERF (ethylene response factor) subfamily B-1 of ERF/AP2 transcription factor family. The protein contains one AP2 domain. There are 15 members in this subfamily including ATERF-3, ATERF-4, ATERF-7, and leafy petiole.	28.3458	0.622687	3.42078e-09	3.55887e-07	AT1G28370	AT1G28370.1	encodes a member of the ERF (ethylene response factor) subfamily B-1 of ERF/AP2 transcription factor family. The protein contains one AP2 domain. There are 15 members in this subfamily including ATERF-3, ATERF-4, ATERF-7, and leafy petiole.	0.820075	0.387912	0.284419	0.436592	AT1G28370	AT1G28370.1	encodes a member of the ERF (ethylene response factor) subfamily B-1 of ERF/AP2 transcription factor family. The protein contains one AP2 domain. There are 15 members in this subfamily including ATERF-3, ATERF-4, ATERF-7, and leafy petiole.	AT1G28370	AT1G28370.1	encodes a member of the ERF (ethylene response factor) subfamily B-1 of ERF/AP2 transcription factor family. The protein contains one AP2 domain. There are 15 members in this subfamily including ATERF-3, ATERF-4, ATERF-7, and leafy petiole.	6.34203	0.387259	3.36464	58.0305
CATMA4a35030	0.50676	1.38016	0.901255	1.32984	0.428301	1.21967	0.726712	1.02938	6.26213e-05	AT4G33300	AT4G33300.1	disease resistance protein (CC-NBS-LRR class), putative, domain signature CC-NBS-LRR exists, suggestive of a disease resistance protein.	0.878366	0.405674	2.94903e-14	2.96992e-11	AT4G33300	AT4G33300.1	disease resistance protein (CC-NBS-LRR class), putative, domain signature CC-NBS-LRR exists, suggestive of a disease resistance protein.	1.59997	1.40178	0.0152909	0.0523276	AT4G33300	AT4G33300.1	disease resistance protein (CC-NBS-LRR class), putative, domain signature CC-NBS-LRR exists, suggestive of a disease resistance protein.	0.705042	0.513402	0.00556223	0.0418174	AT4G33300	AT4G33300.1	disease resistance protein (CC-NBS-LRR class), putative, domain signature CC-NBS-LRR exists, suggestive of a disease resistance protein.	AT4G33300	AT4G33300.1	disease resistance protein (CC-NBS-LRR class), putative, domain signature CC-NBS-LRR exists, suggestive of a disease resistance protein.	1.15664	0.789765	0.973203	57.7698
CATMA1a18400	0.707743	1.0734	0.385278	0.226281	0.276079	0.871742	0.563613	0.484054	0.0035481	AT1G19380	AT1G19380.1	expressed protein	0.687136	0.305856	4.80778e-09	8.30028e-07	AT1G19380	AT1G19380.1	expressed protein	2.70909	1.39416	2.49063e-07	1.15907e-05	AT1G19380	AT1G19380.1	expressed protein	0.836497	0.26968	1.28771e-07	0.000137606	AT1G19380	AT1G19380.1	expressed protein	AT1G19380	AT1G19380.1	expressed protein	1.23557	0.583718	0.909646	57.5629
CATMA5a15610	0.429184	0.850138	0.185133	0.160324	0.0353289	0.315752	0.0785553	0.0691919	6.77846e-07	AT5G17350	AT5G17350.1	expressed protein	0.852158	0.690736	7.14927e-08	8.55435e-06	AT5G17350	AT5G17350.1	expressed protein	7.76706	0.992166	8.27033e-08	4.5875e-06	AT5G17350	AT5G17350.1	expressed protein	0.571596	0.447685	0.0860748	0.210223	AT5G17350	AT5G17350.1	expressed protein	AT5G17350	AT5G17350.1	expressed protein	2.07134	0.478855	1.2751	57.3113
CATMA1a62360	0.29152	1.0163	0.167188	0.0359648	0.462013	1.29085	0.583759	0.498139	9.82835e-07	AT1G73120	AT1G73120.1	expressed protein	0.185724	0.814293	0.127748	0.379228	AT1G73120	AT1G73120.1	expressed protein	0.949292	0.731555	6.65372e-14	4.35053e-11	AT1G73120	AT1G73120.1	expressed protein	0.778876	0.414529	0.21225	0.362947	AT1G73120	AT1G73120.1	expressed protein	AT1G73120	AT1G73120.1	expressed protein	0.84421	0.542265	0.693237	57.2376
CATMA4a28860	0.889855	0.510052	0.498509	0.859339	0.0540091	0.261608	0.172299	0.0684431	2.72122e-06	AT4G27280	AT4G27280.1	calcium-binding EF hand family protein, similar to EF-hand Ca2+-binding protein CCD1 (Triticum aestivum) GI:9255753; contains INTERPRO:IPR002048 calcium-binding EF-hand domain	0.866537	0.328025	2.19592e-09	4.28027e-07	AT4G27280	AT4G27280.1	calcium-binding EF hand family protein, similar to EF-hand Ca2+-binding protein CCD1 (Triticum aestivum) GI:9255753; contains INTERPRO:IPR002048 calcium-binding EF-hand domain	6.34003	0.411301	1.35121e-05	0.000266795	AT4G27280	AT4G27280.1	calcium-binding EF hand family protein, similar to EF-hand Ca2+-binding protein CCD1 (Triticum aestivum) GI:9255753; contains INTERPRO:IPR002048 calcium-binding EF-hand domain	0.774804	0.250557	0.00240527	0.0256162	AT4G27280	AT4G27280.1	calcium-binding EF hand family protein, similar to EF-hand Ca2+-binding protein CCD1 (Triticum aestivum) GI:9255753; contains INTERPRO:IPR002048 calcium-binding EF-hand domain	AT4G27280	AT4G27280.1	calcium-binding EF hand family protein, similar to EF-hand Ca2+-binding protein CCD1 (Triticum aestivum) GI:9255753; contains INTERPRO:IPR002048 calcium-binding EF-hand domain	1.75061	0.332138	1.04137	56.8019
CATMA1a28380	1.20518	0.545351	0.556748	1.0087	2.013	0.534312	0.263427	0.549215	0.000526483	AT1G30370	AT1G30370.1	lipase class 3 family protein, similar to DEFECTIVE IN ANTHER DEHISCENCE1 (Arabidopsis thaliana) GI:16215706; contains Pfam profile: PF01764: Lipase	0.649767	0.145085	8.20757e-12	3.81494e-09	AT1G30370	AT1G30370.1	lipase class 3 family protein, similar to DEFECTIVE IN ANTHER DEHISCENCE1 (Arabidopsis thaliana) GI:16215706; contains Pfam profile: PF01764: Lipase	9.07895	1.3884	7.66643e-06	0.00017345	AT1G30370	AT1G30370.1	lipase class 3 family protein, similar to DEFECTIVE IN ANTHER DEHISCENCE1 (Arabidopsis thaliana) GI:16215706; contains Pfam profile: PF01764: Lipase	0.505623	0.472343	0.00214574	0.0238851	AT1G30370	AT1G30370.1	lipase class 3 family protein, similar to DEFECTIVE IN ANTHER DEHISCENCE1 (Arabidopsis thaliana) GI:16215706; contains Pfam profile: PF01764: Lipase	AT1G30370	AT1G30370.1	lipase class 3 family protein, similar to DEFECTIVE IN ANTHER DEHISCENCE1 (Arabidopsis thaliana) GI:16215706; contains Pfam profile: PF01764: Lipase	2.2628	0.565201	1.414	56.738
CATMA4a38980	1.7053	6.86928	21.9571	16.1189	1.68086	1.29621	0.883542	0.800818	0.00103296	AT4G37410	AT4G37410.1	cytochrome P450, putative, similar to cytochrome p450 SP:O65790 from (Arabidopsis thaliana)	0.56116	0.880684	5.23072e-08	6.72481e-06	AT4G37410	AT4G37410.1	cytochrome P450, putative, similar to cytochrome p450 SP:O65790 from (Arabidopsis thaliana)	2.25613	10.0587	2.84449e-11	7.5913e-09	AT4G37410	AT4G37410.1	cytochrome P450, putative, similar to cytochrome p450 SP:O65790 from (Arabidopsis thaliana)	2.18175	4.14015	0.0609177	0.170914	AT4G37410	AT4G37410.1	cytochrome P450, putative, similar to cytochrome p450 SP:O65790 from (Arabidopsis thaliana)	AT4G37410	AT4G37410.1	cytochrome P450, putative, similar to cytochrome p450 SP:O65790 from (Arabidopsis thaliana)	2.6329	7.58404	5.10847	56.6227
CATMA1a37950	0.696249	0.563064	3.4017	1.69677	6.68665	2.45268	0.906639	1.10999	0.380343	AT1G45015	AT1G45015.1	MD-2-related lipid recognition domain-containing protein / ML domain-containing protein, contains Pfam profile PF02221: ML domain	0.822528	2.37638	6.23588e-11	1.93232e-08	AT1G45015	AT1G45015.1	MD-2-related lipid recognition domain-containing protein / ML domain-containing protein, contains Pfam profile PF02221: ML domain	0.690983	1.78187	1.38546e-09	1.83007e-07	AT1G45015	AT1G45015.1	MD-2-related lipid recognition domain-containing protein / ML domain-containing protein, contains Pfam profile PF02221: ML domain	0.561511	1.97849	0.000253508	0.00732168	AT1G45015	AT1G45015.1	MD-2-related lipid recognition domain-containing protein / ML domain-containing protein, contains Pfam profile PF02221: ML domain	AT1G45015	AT1G45015.1	MD-2-related lipid recognition domain-containing protein / ML domain-containing protein, contains Pfam profile PF02221: ML domain	1.01815	2.08901	1.55358	56.4949
CATMA3a15560	0.0919933	0.50233	0.0500028	0.381178	0.389274	0.72374	0.472915	0.332077	7.58365e-09	AT3G16150	AT3G16150.1	L-asparaginase, putative / L-asparagine amidohydrolase, putative, similar to Swiss-Prot:P30364 L-asparaginase (EC 3.5.1.1) (L-asparagine amidohydrolase) (Lupinus angustifolius)	0.900937	0.568952	0.0154465	0.116869	AT3G16150	AT3G16150.1	L-asparaginase, putative / L-asparagine amidohydrolase, putative, similar to Swiss-Prot:P30364 L-asparaginase (EC 3.5.1.1) (L-asparagine amidohydrolase) (Lupinus angustifolius)	0.84124	0.770237	1.651e-07	8.01015e-06	AT3G16150	AT3G16150.1	L-asparaginase, putative / L-asparagine amidohydrolase, putative, similar to Swiss-Prot:P30364 L-asparaginase (EC 3.5.1.1) (L-asparagine amidohydrolase) (Lupinus angustifolius)	0.643205	0.257	1.24978e-05	0.00149672	AT3G16150	AT3G16150.1	L-asparaginase, putative / L-asparagine amidohydrolase, putative, similar to Swiss-Prot:P30364 L-asparaginase (EC 3.5.1.1) (L-asparagine amidohydrolase) (Lupinus angustifolius)	AT3G16150	AT3G16150.1	L-asparaginase, putative / L-asparagine amidohydrolase, putative, similar to Swiss-Prot:P30364 L-asparaginase (EC 3.5.1.1) (L-asparagine amidohydrolase) (Lupinus angustifolius)	0.722291	0.423821	0.573056	56.3852
CATMA3a15360	0.23847	0.970257	2.31907	0.973635	1.23192	1.47139	2.60428	2.59272	0.00024871	AT3G15950	AT3G15950.1	Similar to TSK-associating protein 1 (TSA1), contains 10 EFE repeats, a novel repeat sequence unique to plants. Expressed preferentially in the roots.	1.13468	2.70465	1.41756e-12	9.01643e-10	AT3G15950	AT3G15950.1	Similar to TSK-associating protein 1 (TSA1), contains 10 EFE repeats, a novel repeat sequence unique to plants. Expressed preferentially in the roots.	0.802768	1.37837	0.000116931	0.001399	AT3G15950	AT3G15950.1	Similar to TSK-associating protein 1 (TSA1), contains 10 EFE repeats, a novel repeat sequence unique to plants. Expressed preferentially in the roots.	1.49665	2.40009	0.00588799	0.0432097	AT3G15950	AT3G15950.1	Similar to TSK-associating protein 1 (TSA1), contains 10 EFE repeats, a novel repeat sequence unique to plants. Expressed preferentially in the roots.	AT3G15950	AT3G15950.1	Similar to TSK-associating protein 1 (TSA1), contains 10 EFE repeats, a novel repeat sequence unique to plants. Expressed preferentially in the roots.	1.17515	2.28129	1.72822	56.0339
CATMA5a51870	0.436171	0.476144	0.271438	1.35815	0.0965042	0.29598	0.199347	0.201572	5.28822e-07	AT5G56100	AT5G56100.1	glycine-rich protein / oleosin, contains Pfam PF01277: Oleosin domain	1.15445	0.440705	1.86457e-06	0.000129293	AT5G56100	AT5G56100.1	glycine-rich protein / oleosin, contains Pfam PF01277: Oleosin domain	0.529552	0.761596	4.18317e-07	1.74771e-05	AT5G56100	AT5G56100.1	glycine-rich protein / oleosin, contains Pfam PF01277: Oleosin domain	1.25661	0.56755	0.000644817	0.0121051	AT5G56100	AT5G56100.1	glycine-rich protein / oleosin, contains Pfam PF01277: Oleosin domain	AT5G56100	AT5G56100.1	glycine-rich protein / oleosin, contains Pfam PF01277: Oleosin domain	0.742546	0.448127	0.595337	55.9402
CATMA2a45915	4.4483	0.478521	0.978894	2.63057	17.1645	1.286	0.961644	1.70239	0.00159341	AT2G47460	AT2G47460.1	MYB12 belongs to subgroup 7 of the R2R3-MYB family. It strongly activates the promoters of chalcone synthase (CHS), flavanone 3-hydroxylase (F3H), flavonol synthase (FLS) and - to a lesser extent - chalcone flavanone isomerase (CHI), but cannot activ	0.458206	1.91179	1.28973e-09	2.64176e-07	AT2G47460	AT2G47460.1	MYB12 belongs to subgroup 7 of the R2R3-MYB family. It strongly activates the promoters of chalcone synthase (CHS), flavanone 3-hydroxylase (F3H), flavonol synthase (FLS) and - to a lesser extent - chalcone flavanone isomerase (CHI), but cannot activ	0.803612	1.80244	4.7503e-08	2.94406e-06	AT2G47460	AT2G47460.1	MYB12 belongs to subgroup 7 of the R2R3-MYB family. It strongly activates the promoters of chalcone synthase (CHS), flavanone 3-hydroxylase (F3H), flavonol synthase (FLS) and - to a lesser extent - chalcone flavanone isomerase (CHI), but cannot activ	1.43304	3.35001	0.000771917	0.0133211	AT2G47460	AT2G47460.1	MYB12 belongs to subgroup 7 of the R2R3-MYB family. It strongly activates the promoters of chalcone synthase (CHS), flavanone 3-hydroxylase (F3H), flavonol synthase (FLS) and - to a lesser extent - chalcone flavanone isomerase (CHI), but cannot activ	AT2G47460	AT2G47460.1	MYB12 belongs to subgroup 7 of the R2R3-MYB family. It strongly activates the promoters of chalcone synthase (CHS), flavanone 3-hydroxylase (F3H), flavonol synthase (FLS) and - to a lesser extent - chalcone flavanone isomerase (CHI), but cannot activ	0.891877	1.80096	1.34642	55.7496
CATMA1a21010	1.46462	1.21249	0.180445	0.466254	0.144968	0.992655	0.464584	0.457083	4.15329e-05	AT1G21910	AT1G21910.1	encodes a member of the DREB subfamily A-5 of ERF/AP2 transcription factor family. The protein contains one AP2 domain. There are 15 members in this subfamily including RAP2.1, RAP2.9 and RAP2.10.	0.924769	0.361646	1.37241e-05	0.000652976	AT1G21910	AT1G21910.1	encodes a member of the DREB subfamily A-5 of ERF/AP2 transcription factor family. The protein contains one AP2 domain. There are 15 members in this subfamily including RAP2.1, RAP2.9 and RAP2.10.	3.26866	0.495091	1.51431e-11	4.40059e-09	AT1G21910	AT1G21910.1	encodes a member of the DREB subfamily A-5 of ERF/AP2 transcription factor family. The protein contains one AP2 domain. There are 15 members in this subfamily including RAP2.1, RAP2.9 and RAP2.10.	1.20152	0.609685	0.107534	0.239208	AT1G21910	AT1G21910.1	encodes a member of the DREB subfamily A-5 of ERF/AP2 transcription factor family. The protein contains one AP2 domain. There are 15 members in this subfamily including RAP2.1, RAP2.9 and RAP2.10.	AT1G21910	AT1G21910.1	encodes a member of the DREB subfamily A-5 of ERF/AP2 transcription factor family. The protein contains one AP2 domain. There are 15 members in this subfamily including RAP2.1, RAP2.9 and RAP2.10.	1.52002	0.42229	0.971153	54.9594
CATMA1a13385	0.637208	0.666601	1.0245	0.750468	0.771518	0.801743	0.525174	0.395489	0.0292405	AT1G14370	APK2A	APK2a mRNA for protein kinase, complete cds	0.755724	0.37513	8.44599e-06	0.00044923	AT1G14370	APK2A	APK2a mRNA for protein kinase, complete cds	3.08028	1.18745	2.62449e-08	1.84519e-06	AT1G14370	APK2A	APK2a mRNA for protein kinase, complete cds	1.12814	0.26008	2.26753e-10	1.39131e-06	AT1G14370	APK2A	APK2a mRNA for protein kinase, complete cds	AT1G14370	APK2A	APK2a mRNA for protein kinase, complete cds	1.2865	0.674468	0.980482	54.7191
CATMA5a22640	0.133141	1.37727	4.95074	18.3467	0.158676	0.687384	0.831607	0.580963	4.37325e-07	AT5G24920	AT5G24920.1	expressed protein, ; expression supported by MPSS	1.2209	1.44687	0.011519	0.0974843	AT5G24920	AT5G24920.1	expressed protein, ; expression supported by MPSS	2.12488	1.95818	1.44297e-10	3.09339e-08	AT5G24920	AT5G24920.1	expressed protein, ; expression supported by MPSS	2.95434	2.4712	0.00297248	0.0290381	AT5G24920	AT5G24920.1	expressed protein, ; expression supported by MPSS	AT5G24920	AT5G24920.1	expressed protein, ; expression supported by MPSS	1.67295	2.33172	2.00234	54.5356
CATMA2a16550	0.444418	0.71735	0.127579	0.753233	0.0907469	0.4913	0.093342	0.111098	7.88807e-07	AT2G17880	AT2G17880.1	DNAJ heat shock protein, putative, similar to J11 protein (Arabidopsis thaliana) GI:9843641; contains Pfam profile PF00226 DnaJ domain	0.923177	0.27821	6.857e-07	6.00485e-05	AT2G17880	AT2G17880.1	DNAJ heat shock protein, putative, similar to J11 protein (Arabidopsis thaliana) GI:9843641; contains Pfam profile PF00226 DnaJ domain	0.857777	0.808488	4.90233e-07	1.97294e-05	AT2G17880	AT2G17880.1	DNAJ heat shock protein, putative, similar to J11 protein (Arabidopsis thaliana) GI:9843641; contains Pfam profile PF00226 DnaJ domain	0.673482	0.33189	0.00992101	0.0578601	AT2G17880	AT2G17880.1	DNAJ heat shock protein, putative, similar to J11 protein (Arabidopsis thaliana) GI:9843641; contains Pfam profile PF00226 DnaJ domain	AT2G17880	AT2G17880.1	DNAJ heat shock protein, putative, similar to J11 protein (Arabidopsis thaliana) GI:9843641; contains Pfam profile PF00226 DnaJ domain	0.732617	0.327902	0.530259	54.0379
CATMA5a55595	0.273561	0.567201	0.400992	0.224723	0.132122	0.526582	0.305099	0.302387	1.19784e-05	AT5G59820	AT5G59820.1	zinc finger (C2H2 type) family protein (ZAT12), identical to zinc finger protein ZAT12 (Arabidopsis thaliana) gi|1418325|emb|CAA67232	0.445837	0.367475	2.0233e-08	2.87666e-06	AT5G59820	AT5G59820.1	zinc finger (C2H2 type) family protein (ZAT12), identical to zinc finger protein ZAT12 (Arabidopsis thaliana) gi|1418325|emb|CAA67232	8.86007	0.96348	4.3575e-08	2.73957e-06	AT5G59820	AT5G59820.1	zinc finger (C2H2 type) family protein (ZAT12), identical to zinc finger protein ZAT12 (Arabidopsis thaliana) gi|1418325|emb|CAA67232	1.38971	1.05964	0.441397	0.577554	AT5G59820	AT5G59820.1	zinc finger (C2H2 type) family protein (ZAT12), identical to zinc finger protein ZAT12 (Arabidopsis thaliana) gi|1418325|emb|CAA67232	AT5G59820	AT5G59820.1	zinc finger (C2H2 type) family protein (ZAT12), identical to zinc finger protein ZAT12 (Arabidopsis thaliana) gi|1418325|emb|CAA67232	2.35788	0.619337	1.48861	54.026
CATMA1a50390	0.198858	0.693045	0.208062	0.053916	0.397098	0.816065	1.20301	0.752021	0.000123608	AT1G61340	AT1G61340.1	F-box family protein, contains Pfam PF00646: F-box domain; similar to late embryogenesis abundant protein GI:1350540 from (Picea glauca)	0.869398	0.483323	2.76757e-06	0.000180789	AT1G61340	AT1G61340.1	F-box family protein, contains Pfam PF00646: F-box domain; similar to late embryogenesis abundant protein GI:1350540 from (Picea glauca)	11.8593	0.996271	3.37819e-10	6.05159e-08	AT1G61340	AT1G61340.1	F-box family protein, contains Pfam PF00646: F-box domain; similar to late embryogenesis abundant protein GI:1350540 from (Picea glauca)	3.29069	0.811821	0.00851093	0.0529722	AT1G61340	AT1G61340.1	F-box family protein, contains Pfam PF00646: F-box domain; similar to late embryogenesis abundant protein GI:1350540 from (Picea glauca)	AT1G61340	AT1G61340.1	F-box family protein, contains Pfam PF00646: F-box domain; similar to late embryogenesis abundant protein GI:1350540 from (Picea glauca)	3.50571	0.740497	2.1231	53.6321
CATMA1a65800	0.349363	0.642013	0.269059	0.216709	0.21351	0.618046	0.315205	1.48954	9.55484e-07	AT1G76600	AT1G76600.1	expressed protein	0.784186	0.361512	2.9504e-11	1.08047e-08	AT1G76600	AT1G76600.1	expressed protein	2.83012	0.397695	0.0632499	0.1445	AT1G76600	AT1G76600.1	expressed protein	1.00356	0.45647	0.00766134	0.0496616	AT1G76600	AT1G76600.1	expressed protein	AT1G76600	AT1G76600.1	expressed protein	1.17558	0.359988	0.767786	53.5836
CATMA1a30510	1.43071	1.13847	0.61519	0.555366	1.11728	0.97377	0.531794	0.591741	0.00148096	AT1G32170	AT1G32170.1	xyloglucan:xyloglucosyl transferase, putative / xyloglucan endotransglycosylase, putative / endo-xyloglucan transferase, putative (XTR4), identical to N-terminal partial sequence of xyloglucan endotransglycosylase-related protein XTR4 GI:1244754 from	0.827491	0.318782	9.84405e-07	7.82667e-05	AT1G32170	AT1G32170.1	xyloglucan:xyloglucosyl transferase, putative / xyloglucan endotransglycosylase, putative / endo-xyloglucan transferase, putative (XTR4), identical to N-terminal partial sequence of xyloglucan endotransglycosylase-related protein XTR4 GI:1244754 from	0.728259	0.559583	3.58655e-08	2.34507e-06	AT1G32170	AT1G32170.1	xyloglucan:xyloglucosyl transferase, putative / xyloglucan endotransglycosylase, putative / endo-xyloglucan transferase, putative (XTR4), identical to N-terminal partial sequence of xyloglucan endotransglycosylase-related protein XTR4 GI:1244754 from	1.22647	0.443268	6.03629e-07	0.000272621	AT1G32170	AT1G32170.1	xyloglucan:xyloglucosyl transferase, putative / xyloglucan endotransglycosylase, putative / endo-xyloglucan transferase, putative (XTR4), identical to N-terminal partial sequence of xyloglucan endotransglycosylase-related protein XTR4 GI:1244754 from	AT1G32170	AT1G32170.1	xyloglucan:xyloglucosyl transferase, putative / xyloglucan endotransglycosylase, putative / endo-xyloglucan transferase, putative (XTR4), identical to N-terminal partial sequence of xyloglucan endotransglycosylase-related protein XTR4 GI:1244754 from	0.978892	0.493723	0.736308	53.5832
CATMA4a29880	0.923562	0.606455	0.257178	1.01785	0.489946	0.346753	0.229212	0.290674	1.48737e-08	AT4G28220	AT4G28220.1	NADH dehydrogenase-related, similar to 64 kDa mitochondrial NADH dehydrogenase (Neurospora crassa) GI:4753821, alternative NADH-dehydrogenase (Yarrowia lipolytica) GI:3718005; contains Pfam profile PF00070: Pyridine nucleotide-disulphide oxidoreducta	0.758181	0.512201	0.000133325	0.00434043	AT4G28220	AT4G28220.1	NADH dehydrogenase-related, similar to 64 kDa mitochondrial NADH dehydrogenase (Neurospora crassa) GI:4753821, alternative NADH-dehydrogenase (Yarrowia lipolytica) GI:3718005; contains Pfam profile PF00070: Pyridine nucleotide-disulphide oxidoreducta	0.837078	0.858905	1.7415e-05	0.000327206	AT4G28220	AT4G28220.1	NADH dehydrogenase-related, similar to 64 kDa mitochondrial NADH dehydrogenase (Neurospora crassa) GI:4753821, alternative NADH-dehydrogenase (Yarrowia lipolytica) GI:3718005; contains Pfam profile PF00070: Pyridine nucleotide-disulphide oxidoreducta	0.475386	0.63601	6.20537e-05	0.00353619	AT4G28220	AT4G28220.1	NADH dehydrogenase-related, similar to 64 kDa mitochondrial NADH dehydrogenase (Neurospora crassa) GI:4753821, alternative NADH-dehydrogenase (Yarrowia lipolytica) GI:3718005; contains Pfam profile PF00070: Pyridine nucleotide-disulphide oxidoreducta	AT4G28220	AT4G28220.1	NADH dehydrogenase-related, similar to 64 kDa mitochondrial NADH dehydrogenase (Neurospora crassa) GI:4753821, alternative NADH-dehydrogenase (Yarrowia lipolytica) GI:3718005; contains Pfam profile PF00070: Pyridine nucleotide-disulphide oxidoreducta	0.60477	0.498701	0.551736	53.5717
CATMA2a30820	0.707791	0.530688	1.3931	7.71157	0.366209	0.836369	0.956416	3.15748	5.12812e-09	AT2G32550	AT2G32550.1	rcd1-like cell differentiation family protein, weak similarity to protein involved in sexual development (Schizosaccharomyces pombe) GI:1620896; contains Pfam profile PF04078: Cell differentiation family, Rcd1-like	0.660701	1.78629	0.0104725	0.0924468	AT2G32550	AT2G32550.1	rcd1-like cell differentiation family protein, weak similarity to protein involved in sexual development (Schizosaccharomyces pombe) GI:1620896; contains Pfam profile PF04078: Cell differentiation family, Rcd1-like	0.793426	0.965391	5.20643e-09	5.04329e-07	AT2G32550	AT2G32550.1	rcd1-like cell differentiation family protein, weak similarity to protein involved in sexual development (Schizosaccharomyces pombe) GI:1620896; contains Pfam profile PF04078: Cell differentiation family, Rcd1-like	0.528868	1.35213	0.176237	0.322696	AT2G32550	AT2G32550.1	rcd1-like cell differentiation family protein, weak similarity to protein involved in sexual development (Schizosaccharomyces pombe) GI:1620896; contains Pfam profile PF04078: Cell differentiation family, Rcd1-like	AT2G32550	AT2G32550.1	rcd1-like cell differentiation family protein, weak similarity to protein involved in sexual development (Schizosaccharomyces pombe) GI:1620896; contains Pfam profile PF04078: Cell differentiation family, Rcd1-like	0.67001	1.29066	0.980338	53.525
CATMA1a22600	0.31386	0.736077	0.800706	0.508127	0.273701	0.795887	0.787074	0.661183	0.000585473	AT1G23710	AT1G23710.1	expressed protein	0.490406	0.192363	2.11894e-14	2.56074e-11	AT1G23710	AT1G23710.1	expressed protein	1.97619	0.778237	0.00091995	0.00668715	AT1G23710	AT1G23710.1	expressed protein	0.812488	0.876061	0.760582	0.829116	AT1G23710	AT1G23710.1	expressed protein	AT1G23710	AT1G23710.1	expressed protein	0.962209	0.686888	0.824549	53.4175
CATMA1a27920	1.10768	1.06169	0.992522	0.73796	2.01028	1.23602	2.89688	1.85332	0.0101699	AT1G29940	AT1G29940.1	similar to DNA-directed RNA polymerase, putative [Arabidopsis thaliana] (TAIR:At5g45140.1); similar to hypothetical protein UM01133.1 [Ustilago maydis 521] (GB:EAK81692.1); similar to unnamed protein product [Debaryomyces hansenii CBS767] (GB:CAG8974	1.57764	2.56901	1.47403e-09	2.92026e-07	AT1G29940	AT1G29940.1	similar to DNA-directed RNA polymerase, putative [Arabidopsis thaliana] (TAIR:At5g45140.1); similar to hypothetical protein UM01133.1 [Ustilago maydis 521] (GB:EAK81692.1); similar to unnamed protein product [Debaryomyces hansenii CBS767] (GB:CAG8974	1.04768	1.53699	4.09089e-09	4.14702e-07	AT1G29940	AT1G29940.1	similar to DNA-directed RNA polymerase, putative [Arabidopsis thaliana] (TAIR:At5g45140.1); similar to hypothetical protein UM01133.1 [Ustilago maydis 521] (GB:EAK81692.1); similar to unnamed protein product [Debaryomyces hansenii CBS767] (GB:CAG8974	1.40948	1.83344	0.014832	0.0733324	AT1G29940	AT1G29940.1	similar to DNA-directed RNA polymerase, putative [Arabidopsis thaliana] (TAIR:At5g45140.1); similar to hypothetical protein UM01133.1 [Ustilago maydis 521] (GB:EAK81692.1); similar to unnamed protein product [Debaryomyces hansenii CBS767] (GB:CAG8974	AT1G29940	AT1G29940.1	similar to DNA-directed RNA polymerase, putative [Arabidopsis thaliana] (TAIR:At5g45140.1); similar to hypothetical protein UM01133.1 [Ustilago maydis 521] (GB:EAK81692.1); similar to unnamed protein product [Debaryomyces hansenii CBS767] (GB:CAG8974	1.2665	1.96577	1.61614	53.2978
CATMA4a40092	0.533103	0.420983	1.71624	0.642132	0.695916	0.409615	0.481042	1.25829	0.00132198	AT4G38620	AT4G38620.1	myb family transcription factor (MYB4), contains Pfam profile: PF00249 myb-like DNA-binding domain	0.847555	2.3521	2.90895e-05	0.00123349	AT4G38620	AT4G38620.1	myb family transcription factor (MYB4), contains Pfam profile: PF00249 myb-like DNA-binding domain	0.510832	0.796748	4.30111e-10	7.30462e-08	AT4G38620	AT4G38620.1	myb family transcription factor (MYB4), contains Pfam profile: PF00249 myb-like DNA-binding domain	0.618228	3.85269	6.39462e-06	0.00105027	AT4G38620	AT4G38620.1	myb family transcription factor (MYB4), contains Pfam profile: PF00249 myb-like DNA-binding domain	AT4G38620	AT4G38620.1	myb family transcription factor (MYB4), contains Pfam profile: PF00249 myb-like DNA-binding domain	0.561443	1.83976	1.2006	52.8277
CATMA1a53060	1.4405	0.847555	0.674801	0.774492	2.15789	0.692347	0.527178	1.21021	1.46315e-09	AT1G63840	AT1G63840.1	zinc finger (C3HC4-type RING finger) family protein, similar to RING-H2 finger protein RHA1a (GI:3790554) (Arabidopsis thaliana)' similar to BRH1 RING finger protein (Arabidopsis thaliana) GI:4689366; contains Pfam profile PF00097: Zinc finger, C3HC4	0.561465	0.925117	4.72607e-06	0.000273276	AT1G63840	AT1G63840.1	zinc finger (C3HC4-type RING finger) family protein, similar to RING-H2 finger protein RHA1a (GI:3790554) (Arabidopsis thaliana)' similar to BRH1 RING finger protein (Arabidopsis thaliana) GI:4689366; contains Pfam profile PF00097: Zinc finger, C3HC4	0.805056	0.685833	0.00170959	0.0106004	AT1G63840	AT1G63840.1	zinc finger (C3HC4-type RING finger) family protein, similar to RING-H2 finger protein RHA1a (GI:3790554) (Arabidopsis thaliana)' similar to BRH1 RING finger protein (Arabidopsis thaliana) GI:4689366; contains Pfam profile PF00097: Zinc finger, C3HC4	0.794259	1.91598	0.00358713	0.0323377	AT1G63840	AT1G63840.1	zinc finger (C3HC4-type RING finger) family protein, similar to RING-H2 finger protein RHA1a (GI:3790554) (Arabidopsis thaliana)' similar to BRH1 RING finger protein (Arabidopsis thaliana) GI:4689366; contains Pfam profile PF00097: Zinc finger, C3HC4	AT1G63840	AT1G63840.1	zinc finger (C3HC4-type RING finger) family protein, similar to RING-H2 finger protein RHA1a (GI:3790554) (Arabidopsis thaliana)' similar to BRH1 RING finger protein (Arabidopsis thaliana) GI:4689366; contains Pfam profile PF00097: Zinc finger, C3HC4	0.740136	0.945781	0.842959	52.696
CATMA3a43800	1.08918	1.10686	1.67689	1.37251	0.0649007	0.401944	0.277289	0.139045	1.73548e-07	AT3G50800	AT3G50800.1	expressed protein	1.47387	0.555884	0.00320883	0.0427698	AT3G50800	AT3G50800.1	expressed protein	11.0959	0.597385	1.33401e-07	6.70955e-06	AT3G50800	AT3G50800.1	expressed protein	1.4807	0.243412	4.26767e-05	0.00294958	AT3G50800	AT3G50800.1	expressed protein	AT3G50800	AT3G50800.1	expressed protein	3.11186	0.670172	1.89102	52.5961
CATMA2a25985	4.94373	0.954044	0.859778	0.259863	11.7166	0.942562	0.778748	0.753001	5.25434e-06	AT2G27550	AT2G27550.1	centroradialis protein, putative (CEN), strong similarity to SP|Q41261 CENTRORADIALIS protein {Antirrhinum majus}; contains Pfam profile PF01161: Phosphatidylethanolamine-binding protein	1.74473	0.898221	3.05229e-09	5.67491e-07	AT2G27550	AT2G27550.1	centroradialis protein, putative (CEN), strong similarity to SP|Q41261 CENTRORADIALIS protein {Antirrhinum majus}; contains Pfam profile PF01161: Phosphatidylethanolamine-binding protein	1.17817	1.42122	0.000527564	0.00440828	AT2G27550	AT2G27550.1	centroradialis protein, putative (CEN), strong similarity to SP|Q41261 CENTRORADIALIS protein {Antirrhinum majus}; contains Pfam profile PF01161: Phosphatidylethanolamine-binding protein	0.667244	0.186509	0.000631983	0.0119449	AT2G27550	AT2G27550.1	centroradialis protein, putative (CEN), strong similarity to SP|Q41261 CENTRORADIALIS protein {Antirrhinum majus}; contains Pfam profile PF01161: Phosphatidylethanolamine-binding protein	AT2G27550	AT2G27550.1	centroradialis protein, putative (CEN), strong similarity to SP|Q41261 CENTRORADIALIS protein {Antirrhinum majus}; contains Pfam profile PF01161: Phosphatidylethanolamine-binding protein	1.09735	0.828895	0.963123	52.5
CATMA1a29860	1.16339	1.73156	1.39312	1.16878	1.09971	1.05013	2.31571	1.6308	0.000125055	AT1G31660	AT1G31660.1	bystin family, contains Pfam profile: PF05291 Bystin	1.1829	2.67357	1.3014e-08	1.99082e-06	AT1G31660	AT1G31660.1	bystin family, contains Pfam profile: PF05291 Bystin	1.1981	1.77733	0.000167564	0.00184447	AT1G31660	AT1G31660.1	bystin family, contains Pfam profile: PF05291 Bystin	1.53622	3.99271	1.32736e-06	0.000419082	AT1G31660	AT1G31660.1	bystin family, contains Pfam profile: PF05291 Bystin	AT1G31660	AT1G31660.1	bystin family, contains Pfam profile: PF05291 Bystin	1.33978	2.43049	1.88513	52.2064
CATMA4a27470	3.67691	0.560927	0.950319	10.6982	0.846657	0.730595	1.08261	3.29012	6.77677e-07	AT4G25780	AT4G25780.1	pathogenesis-related protein, putative, similar to gene PR-1 protein - Medicago truncatula, SP|Q40374; contains Pfam profile PF00188: SCP-like extracellular protein	0.757591	1.83004	0.0893896	0.313942	AT4G25780	AT4G25780.1	pathogenesis-related protein, putative, similar to gene PR-1 protein - Medicago truncatula, SP|Q40374; contains Pfam profile PF00188: SCP-like extracellular protein	1.44399	1.42962	4.67103e-11	1.15251e-08	AT4G25780	AT4G25780.1	pathogenesis-related protein, putative, similar to gene PR-1 protein - Medicago truncatula, SP|Q40374; contains Pfam profile PF00188: SCP-like extracellular protein	1.08634	2.6631	0.0183784	0.0832384	AT4G25780	AT4G25780.1	pathogenesis-related protein, putative, similar to gene PR-1 protein - Medicago truncatula, SP|Q40374; contains Pfam profile PF00188: SCP-like extracellular protein	AT4G25780	AT4G25780.1	pathogenesis-related protein, putative, similar to gene PR-1 protein - Medicago truncatula, SP|Q40374; contains Pfam profile PF00188: SCP-like extracellular protein	0.915888	1.59114	1.25351	52.1216
CATMA3a45730	0.791485	0.618362	0.434457	0.553771	0.303851	0.734235	0.469123	0.329528	0.00131262	AT3G52800	AT3G52800.1	zinc finger (AN1-like) family protein, contains Pfam domain, PF01428: AN1-like Zinc finger	0.67453	0.352009	5.70561e-09	9.57671e-07	AT3G52800	AT3G52800.1	zinc finger (AN1-like) family protein, contains Pfam domain, PF01428: AN1-like Zinc finger	2.30657	1.08435	2.72826e-06	7.52689e-05	AT3G52800	AT3G52800.1	zinc finger (AN1-like) family protein, contains Pfam domain, PF01428: AN1-like Zinc finger	0.435565	0.155647	2.68194e-05	0.00237354	AT3G52800	AT3G52800.1	zinc finger (AN1-like) family protein, contains Pfam domain, PF01428: AN1-like Zinc finger	AT3G52800	AT3G52800.1	zinc finger (AN1-like) family protein, contains Pfam domain, PF01428: AN1-like Zinc finger	0.953853	0.499117	0.726485	51.9836
CATMA1a17020	0.165626	0.40101	0.166688	0.525521	0.803959	0.525781	0.37956	0.479817	1.23634e-05	AT1G17990	AT1G17990.1	12-oxophytodienoate reductase, putative, similar to OPR1 (GI:3882355) and OPR2 (GI:3882356)	1.2325	0.268618	2.82745e-10	7.11868e-08	AT1G17990	AT1G17990.1	12-oxophytodienoate reductase, putative, similar to OPR1 (GI:3882355) and OPR2 (GI:3882356)	1.15834	0.777872	0.00176027	0.010808	AT1G17990	AT1G17990.1	12-oxophytodienoate reductase, putative, similar to OPR1 (GI:3882355) and OPR2 (GI:3882356)	1.65187	0.321645	0.00234054	0.0252837	AT1G17990	AT1G17990.1	12-oxophytodienoate reductase, putative, similar to OPR1 (GI:3882355) and OPR2 (GI:3882356)	AT1G17990	AT1G17990.1	12-oxophytodienoate reductase, putative, similar to OPR1 (GI:3882355) and OPR2 (GI:3882356)	0.9939	0.382876	0.688388	51.8848
CATMA2a16390	0.621098	0.6265	0.50228	0.313855	0.712445	0.966184	0.294442	0.263352	3.86879e-05	AT2G17710	AT2G17710.1	expressed protein	0.78298	0.285293	1.76396e-06	0.000123938	AT2G17710	AT2G17710.1	expressed protein	1.44622	0.648797	2.24807e-06	6.4218e-05	AT2G17710	AT2G17710.1	expressed protein	0.8208	0.27081	1.19485e-05	0.00146893	AT2G17710	AT2G17710.1	expressed protein	AT2G17710	AT2G17710.1	expressed protein	0.928536	0.400325	0.66443	50.9735
CATMA4a14375	1.68615	1.1756	0.331786	0.437783	0.492007	0.556298	0.32576	0.278787	1.79358e-05	AT4G14130	AT4G14130.1	xyloglucan:xyloglucosyl transferase, putative / xyloglucan endotransglycosylase, putative / endo-xyloglucan transferase, putative (XTR7), almost identical to xyloglucan endotransglycosylase-related protein XTR7 GI:1244760 from (Arabidopsis thaliana),	0.662495	0.333286	0.00884901	0.083809	AT4G14130	AT4G14130.1	xyloglucan:xyloglucosyl transferase, putative / xyloglucan endotransglycosylase, putative / endo-xyloglucan transferase, putative (XTR7), almost identical to xyloglucan endotransglycosylase-related protein XTR7 GI:1244760 from (Arabidopsis thaliana),	1.18056	0.754002	1.73765e-09	2.15344e-07	AT4G14130	AT4G14130.1	xyloglucan:xyloglucosyl transferase, putative / xyloglucan endotransglycosylase, putative / endo-xyloglucan transferase, putative (XTR7), almost identical to xyloglucan endotransglycosylase-related protein XTR7 GI:1244760 from (Arabidopsis thaliana),	0.86475	0.280348	1.14273e-05	0.00144649	AT4G14130	AT4G14130.1	xyloglucan:xyloglucosyl transferase, putative / xyloglucan endotransglycosylase, putative / endo-xyloglucan transferase, putative (XTR7), almost identical to xyloglucan endotransglycosylase-related protein XTR7 GI:1244760 from (Arabidopsis thaliana),	AT4G14130	AT4G14130.1	xyloglucan:xyloglucosyl transferase, putative / xyloglucan endotransglycosylase, putative / endo-xyloglucan transferase, putative (XTR7), almost identical to xyloglucan endotransglycosylase-related protein XTR7 GI:1244760 from (Arabidopsis thaliana),	0.88794	0.405036	0.646488	50.9236
CATMA3a54760	1.59514	0.932403	0.976706	3.37907	0.279612	0.843154	0.65986	1.31422	0.000166922	AT3G61630	AT3G61630.1	AP2 domain-containing transcription factor, putative, transcription factor Pti6 - Lycopersicon esculentum, PIR:T07728	1.08314	1.35377	0.00056144	0.0124267	AT3G61630	AT3G61630.1	AP2 domain-containing transcription factor, putative, transcription factor Pti6 - Lycopersicon esculentum, PIR:T07728	1.80887	3.21871	1.34456e-12	5.17142e-10	AT3G61630	AT3G61630.1	AP2 domain-containing transcription factor, putative, transcription factor Pti6 - Lycopersicon esculentum, PIR:T07728	0.99051	1.31729	0.287092	0.438967	AT3G61630	AT3G61630.1	AP2 domain-containing transcription factor, putative, transcription factor Pti6 - Lycopersicon esculentum, PIR:T07728	AT3G61630	AT3G61630.1	AP2 domain-containing transcription factor, putative, transcription factor Pti6 - Lycopersicon esculentum, PIR:T07728	1.13161	1.50527	1.31844	50.9155
CATMA4a31330	0.716135	1.90878	9.81068	3.52335	23.1124	4.16445	3.23831	1.68902	0.000874607	AT4G29700	AT4G29700.1	type I phosphodiesterase/nucleotide pyrophosphatase family protein, similar to SP|P22413 Ectonucleotide pyrophosphatase/phosphodiesterase 1 (Plasma-cell membrane glycoprotein PC-1) (Includes: Alkaline phosphodiesterase I (EC 3.1.4.1); Nucleotide pyro	1.2805	2.04259	1.05261e-05	0.000525654	AT4G29700	AT4G29700.1	type I phosphodiesterase/nucleotide pyrophosphatase family protein, similar to SP|P22413 Ectonucleotide pyrophosphatase/phosphodiesterase 1 (Plasma-cell membrane glycoprotein PC-1) (Includes: Alkaline phosphodiesterase I (EC 3.1.4.1); Nucleotide pyro	1.58196	2.03425	8.11196e-08	4.57175e-06	AT4G29700	AT4G29700.1	type I phosphodiesterase/nucleotide pyrophosphatase family protein, similar to SP|P22413 Ectonucleotide pyrophosphatase/phosphodiesterase 1 (Plasma-cell membrane glycoprotein PC-1) (Includes: Alkaline phosphodiesterase I (EC 3.1.4.1); Nucleotide pyro	2.38709	5.69258	3.56299e-07	0.0002357	AT4G29700	AT4G29700.1	type I phosphodiesterase/nucleotide pyrophosphatase family protein, similar to SP|P22413 Ectonucleotide pyrophosphatase/phosphodiesterase 1 (Plasma-cell membrane glycoprotein PC-1) (Includes: Alkaline phosphodiesterase I (EC 3.1.4.1); Nucleotide pyro	AT4G29700	AT4G29700.1	type I phosphodiesterase/nucleotide pyrophosphatase family protein, similar to SP|P22413 Ectonucleotide pyrophosphatase/phosphodiesterase 1 (Plasma-cell membrane glycoprotein PC-1) (Includes: Alkaline phosphodiesterase I (EC 3.1.4.1); Nucleotide pyro	2.26456	4.56368	3.41412	50.8423
CATMA3a14920	1.61978	0.775889	0.320505	0.813767	3.16475	1.33959	0.802131	0.912792	0.000165959	AT3G15510	AT3G15510.1	no apical meristem (NAM) family protein (NAC2), identical to AtNAC2 (Arabidopsis thaliana) GI:12060426; contains Pfam PF02365: No apical meristem (NAM) domain; similar to jasmonic acid 2 GB:AAF04915 from (Lycopersicon esculentum)	0.829636	0.599498	0.000900206	0.0175168	AT3G15510	AT3G15510.1	no apical meristem (NAM) family protein (NAC2), identical to AtNAC2 (Arabidopsis thaliana) GI:12060426; contains Pfam PF02365: No apical meristem (NAM) domain; similar to jasmonic acid 2 GB:AAF04915 from (Lycopersicon esculentum)	0.751256	0.523537	2.71902e-10	5.10423e-08	AT3G15510	AT3G15510.1	no apical meristem (NAM) family protein (NAC2), identical to AtNAC2 (Arabidopsis thaliana) GI:12060426; contains Pfam PF02365: No apical meristem (NAM) domain; similar to jasmonic acid 2 GB:AAF04915 from (Lycopersicon esculentum)	0.937411	0.396732	7.76015e-05	0.00390549	AT3G15510	AT3G15510.1	no apical meristem (NAM) family protein (NAC2), identical to AtNAC2 (Arabidopsis thaliana) GI:12060426; contains Pfam PF02365: No apical meristem (NAM) domain; similar to jasmonic acid 2 GB:AAF04915 from (Lycopersicon esculentum)	AT3G15510	AT3G15510.1	no apical meristem (NAM) family protein (NAC2), identical to AtNAC2 (Arabidopsis thaliana) GI:12060426; contains Pfam PF02365: No apical meristem (NAM) domain; similar to jasmonic acid 2 GB:AAF04915 from (Lycopersicon esculentum)	0.926756	0.528481	0.727618	50.616
CATMA1a23980	0.691527	0.937718	1.08983	1.64937	0.42966	1.49263	1.11489	0.851229	4.55988e-06	AT1G25320	AT1G25320.1	leucine-rich repeat transmembrane protein kinase, putative, similar to putative receptor-like protein kinase GI:4262228 from (Arabidopsis thaliana)	0.831901	1.17029	0.47764	0.726318	AT1G25320	AT1G25320.1	leucine-rich repeat transmembrane protein kinase, putative, similar to putative receptor-like protein kinase GI:4262228 from (Arabidopsis thaliana)	0.674054	1.00631	1.30878e-12	5.17142e-10	AT1G25320	AT1G25320.1	leucine-rich repeat transmembrane protein kinase, putative, similar to putative receptor-like protein kinase GI:4262228 from (Arabidopsis thaliana)	0.605938	0.620416	0.211726	0.362334	AT1G25320	AT1G25320.1	leucine-rich repeat transmembrane protein kinase, putative, similar to putative receptor-like protein kinase GI:4262228 from (Arabidopsis thaliana)	AT1G25320	AT1G25320.1	leucine-rich repeat transmembrane protein kinase, putative, similar to putative receptor-like protein kinase GI:4262228 from (Arabidopsis thaliana)	0.908449	1.00034	0.954397	50.5172
CATMA1a61370	0.127002	1.37721	3.37002	10.7404	0.711541	2.35275	2.12385	0.989457	9.45397e-09	AT1G72140	AT1G72140.1	proton-dependent oligopeptide transport (POT) family protein, contains Pfam profile: PF00854 POT family	1.2854	7.05586	1.03166e-06	8.14877e-05	AT1G72140	AT1G72140.1	proton-dependent oligopeptide transport (POT) family protein, contains Pfam profile: PF00854 POT family	0.672622	2.38091	7.29708e-05	0.000977704	AT1G72140	AT1G72140.1	proton-dependent oligopeptide transport (POT) family protein, contains Pfam profile: PF00854 POT family	1.0071	0.50032	0.785825	0.848491	AT1G72140	AT1G72140.1	proton-dependent oligopeptide transport (POT) family protein, contains Pfam profile: PF00854 POT family	AT1G72140	AT1G72140.1	proton-dependent oligopeptide transport (POT) family protein, contains Pfam profile: PF00854 POT family	1.33902	3.08619	2.2126	50.4748
CATMA1a24060	0.493232	1.02217	0.399366	0.570287	0.118394	0.590985	0.337853	0.260719	0.000548494	AT1G25400	AT1G25400.1	expressed protein, similar to unknown protein GI:6714347 from (Arabidopsis thaliana)	0.722612	0.0976995	2.68478e-13	1.93707e-10	AT1G25400	AT1G25400.1	expressed protein, similar to unknown protein GI:6714347 from (Arabidopsis thaliana)	1.84572	0.870862	0.1143	0.220431	AT1G25400	AT1G25400.1	expressed protein, similar to unknown protein GI:6714347 from (Arabidopsis thaliana)	0.0376627	0.133374	0.00276595	0.0277666	AT1G25400	AT1G25400.1	expressed protein, similar to unknown protein GI:6714347 from (Arabidopsis thaliana)	AT1G25400	AT1G25400.1	expressed protein, similar to unknown protein GI:6714347 from (Arabidopsis thaliana)	0.843829	0.367831	0.60583	50.4497
CATMA5a60705	0.366474	1.14555	1.64923	0.549859	0.249645	0.757935	0.761561	0.332213	2.84295e-09	AT5G65310	AT5G65310.1	homeobox-leucine zipper protein 5 (HB-5) / HD-ZIP transcription factor 5, identical to homeobox-leucine zipper protein ATHB-5 (HD-ZIP protein ATHB-5) (SP:P46667) (Arabidopsis thaliana)	1.44553	1.34126	0.315225	0.591352	AT5G65310	AT5G65310.1	homeobox-leucine zipper protein 5 (HB-5) / HD-ZIP transcription factor 5, identical to homeobox-leucine zipper protein ATHB-5 (HD-ZIP protein ATHB-5) (SP:P46667) (Arabidopsis thaliana)	0.653629	0.583785	6.96208e-09	5.98968e-07	AT5G65310	AT5G65310.1	homeobox-leucine zipper protein 5 (HB-5) / HD-ZIP transcription factor 5, identical to homeobox-leucine zipper protein ATHB-5 (HD-ZIP protein ATHB-5) (SP:P46667) (Arabidopsis thaliana)	1.53529	0.786851	0.542623	0.663217	AT5G65310	AT5G65310.1	homeobox-leucine zipper protein 5 (HB-5) / HD-ZIP transcription factor 5, identical to homeobox-leucine zipper protein ATHB-5 (HD-ZIP protein ATHB-5) (SP:P46667) (Arabidopsis thaliana)	AT5G65310	AT5G65310.1	homeobox-leucine zipper protein 5 (HB-5) / HD-ZIP transcription factor 5, identical to homeobox-leucine zipper protein ATHB-5 (HD-ZIP protein ATHB-5) (SP:P46667) (Arabidopsis thaliana)	1.10759	1.02454	1.06606	50.4113
CATMA3a44230	4.97835	1.22539	0.831086	1.84939	5.86323	1.64813	2.1402	2.63288	6.56837e-07	AT3G51240	AT3G51240.1	naringenin 3-dioxygenase / flavanone 3-hydroxylase (F3H), identical to GI:3790548	0.998292	1.92414	0.000259729	0.00701069	AT3G51240	AT3G51240.1	naringenin 3-dioxygenase / flavanone 3-hydroxylase (F3H), identical to GI:3790548	1.08883	0.791273	1.12238e-06	3.78282e-05	AT3G51240	AT3G51240.1	naringenin 3-dioxygenase / flavanone 3-hydroxylase (F3H), identical to GI:3790548	0.589067	2.86862	7.49735e-05	0.00385752	AT3G51240	AT3G51240.1	naringenin 3-dioxygenase / flavanone 3-hydroxylase (F3H), identical to GI:3790548	AT3G51240	AT3G51240.1	naringenin 3-dioxygenase / flavanone 3-hydroxylase (F3H), identical to GI:3790548	1.10994	1.71106	1.4105	50.4025
CATMA4a31410	0.0899757	0.761447	0.279611	0.123383	0.0805301	0.928438	0.632761	0.217633	5.31435e-06	AT4G29780	AT4G29780.1	expressed protein	0.813867	0.331934	4.49592e-07	4.0852e-05	AT4G29780	AT4G29780.1	expressed protein	26.7133	0.92613	1.8941e-06	5.62934e-05	AT4G29780	AT4G29780.1	expressed protein	0.97041	0.15401	0.00939462	0.0557974	AT4G29780	AT4G29780.1	expressed protein	AT4G29780	AT4G29780.1	expressed protein	6.0375	0.464889	3.25119	50.3812
CATMA2a19010	1.77499	1.16375	0.540915	0.807715	9.08819	1.44429	0.832547	1.36268	3.6991e-08	AT2G20515	AT2G20515.1	expressed protein	1.06401	0.568627	0.000190153	0.00549759	AT2G20515	AT2G20515.1	expressed protein	1.08066	0.617861	1.85741e-05	0.000342585	AT2G20515	AT2G20515.1	expressed protein	0.743651	0.203858	0.000458938	0.00979388	AT2G20515	AT2G20515.1	expressed protein	AT2G20515	AT2G20515.1	expressed protein	1.09927	0.552761	0.826017	50.3804
CATMA5a24340	0.115218	1.16929	0.38284	0.22225	0.792536	0.995111	0.544615	0.547751	0.0343515	AT5G26920	AT5G26920.1	similar to calmodulin-binding protein [Arabidopsis thaliana] (TAIR:At4g25800.1); similar to putative calmodulin-binding protein [Oryza sativa (japonica cultivar-group)] (GB:BAD27989.1)	0.763159	0.240596	1.6675e-08	2.51896e-06	AT5G26920	AT5G26920.1	similar to calmodulin-binding protein [Arabidopsis thaliana] (TAIR:At4g25800.1); similar to putative calmodulin-binding protein [Oryza sativa (japonica cultivar-group)] (GB:BAD27989.1)	10.8468	2.25932	3.42797e-10	6.05777e-08	AT5G26920	AT5G26920.1	similar to calmodulin-binding protein [Arabidopsis thaliana] (TAIR:At4g25800.1); similar to putative calmodulin-binding protein [Oryza sativa (japonica cultivar-group)] (GB:BAD27989.1)	1.27891	0.308519	0.0416701	0.136327	AT5G26920	AT5G26920.1	similar to calmodulin-binding protein [Arabidopsis thaliana] (TAIR:At4g25800.1); similar to putative calmodulin-binding protein [Oryza sativa (japonica cultivar-group)] (GB:BAD27989.1)	AT5G26920	AT5G26920.1	similar to calmodulin-binding protein [Arabidopsis thaliana] (TAIR:At4g25800.1); similar to putative calmodulin-binding protein [Oryza sativa (japonica cultivar-group)] (GB:BAD27989.1)	3.01066	0.747179	1.87892	50.3137
CATMA1a65110	2.63062	1.0466	0.789871	0.540444	0.416603	0.344025	0.321747	0.0889365	3.23844e-10	AT1G75820	AT1G75820.1	CLAVATA1 receptor kinase (CLV1), identical to receptor kinase (CLV1) GB:AAB58929 GI:2160756 (Arabidopsis thaliana)	1.92493	0.914913	0.162553	0.429295	AT1G75820	AT1G75820.1	CLAVATA1 receptor kinase (CLV1), identical to receptor kinase (CLV1) GB:AAB58929 GI:2160756 (Arabidopsis thaliana)	0.959618	0.800101	6.8595e-05	0.000930515	AT1G75820	AT1G75820.1	CLAVATA1 receptor kinase (CLV1), identical to receptor kinase (CLV1) GB:AAB58929 GI:2160756 (Arabidopsis thaliana)	0.497374	0.292608	0.000173284	0.00606363	AT1G75820	AT1G75820.1	CLAVATA1 receptor kinase (CLV1), identical to receptor kinase (CLV1) GB:AAB58929 GI:2160756 (Arabidopsis thaliana)	AT1G75820	AT1G75820.1	CLAVATA1 receptor kinase (CLV1), identical to receptor kinase (CLV1) GB:AAB58929 GI:2160756 (Arabidopsis thaliana)	0.954511	0.623848	0.789179	50.1792
CATMA5a60600	0.1627	0.511373	0.252879	0.333207	0.124033	0.705111	0.37019	0.20139	6.41853e-07	AT5G65207	AT5G65207.1	expressed protein	0.93457	0.4092	5.94072e-08	7.43994e-06	AT5G65207	AT5G65207.1	expressed protein	0.841078	0.81561	0.0513049	0.124821	AT5G65207	AT5G65207.1	expressed protein	1.60031	0.730543	1.18586e-05	0.00146893	AT5G65207	AT5G65207.1	expressed protein	AT5G65207	AT5G65207.1	expressed protein	0.918487	0.515685	0.717086	50.0206
CATMA3a29930	4.4858	1.66009	14.8039	89.6072	0.730814	0.839729	0.600695	0.792424	0.000175812	AT3G29670	AT3G29670.1	transferase family protein, similar to anthocyanin 5-aromatic acyltransferase from Gentiana triflora GI:4185599, malonyl CoA:anthocyanin 5-O-glucoside-6'''-O-malonyltransferase from Perilla frutescens GI:17980232, Salvia splendens GI:17980234; contai	0.749909	0.626536	0.0533761	0.237685	AT3G29670	AT3G29670.1	transferase family protein, similar to anthocyanin 5-aromatic acyltransferase from Gentiana triflora GI:4185599, malonyl CoA:anthocyanin 5-O-glucoside-6'''-O-malonyltransferase from Perilla frutescens GI:17980232, Salvia splendens GI:17980234; contai	3.12152	2.20368	9.4871e-13	4.13543e-10	AT3G29670	AT3G29670.1	transferase family protein, similar to anthocyanin 5-aromatic acyltransferase from Gentiana triflora GI:4185599, malonyl CoA:anthocyanin 5-O-glucoside-6'''-O-malonyltransferase from Perilla frutescens GI:17980232, Salvia splendens GI:17980234; contai	0.973498	0.591878	0.00795136	0.0507397	AT3G29670	AT3G29670.1	transferase family protein, similar to anthocyanin 5-aromatic acyltransferase from Gentiana triflora GI:4185599, malonyl CoA:anthocyanin 5-O-glucoside-6'''-O-malonyltransferase from Perilla frutescens GI:17980232, Salvia splendens GI:17980234; contai	AT3G29670	AT3G29670.1	transferase family protein, similar to anthocyanin 5-aromatic acyltransferase from Gentiana triflora GI:4185599, malonyl CoA:anthocyanin 5-O-glucoside-6'''-O-malonyltransferase from Perilla frutescens GI:17980232, Salvia splendens GI:17980234; contai	1.46895	3.76534	2.61715	50.0185
CATMA2a42950	2.93438	1.09045	0.626521	0.537584	0.668226	0.669423	0.339837	0.242757	2.18741e-06	AT2G44500	AT2G44500.1	expressed protein, contains Pfam PF03138: Plant protein family. The function of this family of plant proteins is unknown; previously annotated as 'axi 1 protein from Nicotiana tabacum -related' based on similarity to axi 1 protein (GB:X80301) (GI:55	0.948634	0.354379	9.43115e-07	7.64063e-05	AT2G44500	AT2G44500.1	expressed protein, contains Pfam PF03138: Plant protein family. The function of this family of plant proteins is unknown; previously annotated as 'axi 1 protein from Nicotiana tabacum -related' based on similarity to axi 1 protein (GB:X80301) (GI:55	1.69429	0.394683	2.3e-05	0.000404262	AT2G44500	AT2G44500.1	expressed protein, contains Pfam PF03138: Plant protein family. The function of this family of plant proteins is unknown; previously annotated as 'axi 1 protein from Nicotiana tabacum -related' based on similarity to axi 1 protein (GB:X80301) (GI:55	1.12468	0.307419	0.000959361	0.0150926	AT2G44500	AT2G44500.1	expressed protein, contains Pfam PF03138: Plant protein family. The function of this family of plant proteins is unknown; previously annotated as 'axi 1 protein from Nicotiana tabacum -related' based on similarity to axi 1 protein (GB:X80301) (GI:55	AT2G44500	AT2G44500.1	expressed protein, contains Pfam PF03138: Plant protein family. The function of this family of plant proteins is unknown; previously annotated as 'axi 1 protein from Nicotiana tabacum -related' based on similarity to axi 1 protein (GB:X80301) (GI:55	1.10549	0.404568	0.755031	49.8007
CATMA4a40270	0.657739	0.377163	0.122576	4.81281	1.6634	0.850969	1.3339	2.71506	0.00110651	AT4G38840	AT4G38840.1	auxin-responsive protein, putative, auxin-inducible SAUR gene, Raphanus sativus,AB000708	1.39537	2.55165	0.00127512	0.0223739	AT4G38840	AT4G38840.1	auxin-responsive protein, putative, auxin-inducible SAUR gene, Raphanus sativus,AB000708	1.16928	2.18492	3.9372e-11	1.00954e-08	AT4G38840	AT4G38840.1	auxin-responsive protein, putative, auxin-inducible SAUR gene, Raphanus sativus,AB000708	0.964701	2.20082	0.00010845	0.00471166	AT4G38840	AT4G38840.1	auxin-responsive protein, putative, auxin-inducible SAUR gene, Raphanus sativus,AB000708	AT4G38840	AT4G38840.1	auxin-responsive protein, putative, auxin-inducible SAUR gene, Raphanus sativus,AB000708	0.951498	1.67877	1.31514	49.5931
CATMA3a47640	0.110056	0.640971	1.03927	1.34644	0.404592	0.860545	1.44938	1.81962	4.60203e-09	AT3G54720	AMP1	Encodes glutamate carboxypeptidase. Various alleles show-increased cotyledon number and rate of leaf initiation, show transformation of leaves to cotyledons, altered flowering time and photomorphogenesis and an increased level of cytokinin biosynthes	1.14095	3.81232	0.000984256	0.0184415	AT3G54720	AMP1	Encodes glutamate carboxypeptidase. Various alleles show-increased cotyledon number and rate of leaf initiation, show transformation of leaves to cotyledons, altered flowering time and photomorphogenesis and an increased level of cytokinin biosynthes	1.98507	2.1201	0.00153743	0.0097921	AT3G54720	AMP1	Encodes glutamate carboxypeptidase. Various alleles show-increased cotyledon number and rate of leaf initiation, show transformation of leaves to cotyledons, altered flowering time and photomorphogenesis and an increased level of cytokinin biosynthes	0.426122	2.36951	1.24953e-05	0.00149672	AT3G54720	AMP1	Encodes glutamate carboxypeptidase. Various alleles show-increased cotyledon number and rate of leaf initiation, show transformation of leaves to cotyledons, altered flowering time and photomorphogenesis and an increased level of cytokinin biosynthes	AT3G54720	AMP1	Encodes glutamate carboxypeptidase. Various alleles show-increased cotyledon number and rate of leaf initiation, show transformation of leaves to cotyledons, altered flowering time and photomorphogenesis and an increased level of cytokinin biosynthes	1.01073	2.15812	1.58442	49.5141
CATMA1a13490	1.13209	0.945421	0.414995	0.10572	11.3274	1.37431	1.98035	2.63024	0.00010717	AT1G14480	AT1G14480.1	similar to ankyrin repeat family protein [Arabidopsis thaliana] (TAIR:At1g14500.1); similar to ankyrin-like protein [Oryza sativa (japonica cultivar-group)] (GB:BAD30891.1); contains InterPro domain Ankyrin (InterPro:IPR002110)	0.777395	0.585903	0.000271459	0.0072419	AT1G14480	AT1G14480.1	similar to ankyrin repeat family protein [Arabidopsis thaliana] (TAIR:At1g14500.1); similar to ankyrin-like protein [Oryza sativa (japonica cultivar-group)] (GB:BAD30891.1); contains InterPro domain Ankyrin (InterPro:IPR002110)	1.92053	0.632947	1.54668e-08	1.1968e-06	AT1G14480	AT1G14480.1	similar to ankyrin repeat family protein [Arabidopsis thaliana] (TAIR:At1g14500.1); similar to ankyrin-like protein [Oryza sativa (japonica cultivar-group)] (GB:BAD30891.1); contains InterPro domain Ankyrin (InterPro:IPR002110)	0.458335	0.155192	1.41256e-05	0.00163527	AT1G14480	AT1G14480.1	similar to ankyrin repeat family protein [Arabidopsis thaliana] (TAIR:At1g14500.1); similar to ankyrin-like protein [Oryza sativa (japonica cultivar-group)] (GB:BAD30891.1); contains InterPro domain Ankyrin (InterPro:IPR002110)	AT1G14480	AT1G14480.1	similar to ankyrin repeat family protein [Arabidopsis thaliana] (TAIR:At1g14500.1); similar to ankyrin-like protein [Oryza sativa (japonica cultivar-group)] (GB:BAD30891.1); contains InterPro domain Ankyrin (InterPro:IPR002110)	1.0952	0.753878	0.924538	49.2259
CATMA5a43215	0.848208	0.497979	0.806903	0.870583	0.0473	0.442733	0.182679	0.0813609	0.000147041	AT5G47230	AT5G47230.1	encodes a member of the ERF (ethylene response factor) subfamily B-3 of ERF/AP2 transcription factor family (ATERF-5). The protein contains one AP2 domain. There are 18 members in this subfamily including ATERF-1, ATERF-2, AND ATERF-5.	0.523389	0.16064	2.72489e-13	1.93707e-10	AT5G47230	AT5G47230.1	encodes a member of the ERF (ethylene response factor) subfamily B-3 of ERF/AP2 transcription factor family (ATERF-5). The protein contains one AP2 domain. There are 18 members in this subfamily including ATERF-1, ATERF-2, AND ATERF-5.	8.93894	0.326635	0.125587	0.236575	AT5G47230	AT5G47230.1	encodes a member of the ERF (ethylene response factor) subfamily B-3 of ERF/AP2 transcription factor family (ATERF-5). The protein contains one AP2 domain. There are 18 members in this subfamily including ATERF-1, ATERF-2, AND ATERF-5.	0.351529	0.304281	0.0989885	0.227778	AT5G47230	AT5G47230.1	encodes a member of the ERF (ethylene response factor) subfamily B-3 of ERF/AP2 transcription factor family (ATERF-5). The protein contains one AP2 domain. There are 18 members in this subfamily including ATERF-1, ATERF-2, AND ATERF-5.	AT5G47230	AT5G47230.1	encodes a member of the ERF (ethylene response factor) subfamily B-3 of ERF/AP2 transcription factor family (ATERF-5). The protein contains one AP2 domain. There are 18 members in this subfamily including ATERF-1, ATERF-2, AND ATERF-5.	2.15091	0.356228	1.25357	49.2108
CATMA2a24120	0.37342	0.731728	0.299519	0.633836	0.091479	0.429689	0.307239	0.0891319	0.000123643	AT2G25735	AT2G25735.1	expressed protein	0.900889	0.266887	1.13462e-09	2.42916e-07	AT2G25735	AT2G25735.1	expressed protein	7.93905	3.2064	4.82191e-06	0.000118683	AT2G25735	AT2G25735.1	expressed protein	1.4989	0.80536	0.32506	0.47549	AT2G25735	AT2G25735.1	expressed protein	AT2G25735	AT2G25735.1	expressed protein	2.30005	0.977081	1.63857	49.0677
CATMA3a22775	15.1718	1.43839	2.47547	5.18133	4.68849	1.50122	4.27151	2.44022	4.66683e-05	AT3G22840	AT3G22840.1	chlorophyll A-B binding family protein / early light-induced protein (ELIP), identical to early light-induced protein; ELIP (Arabidopsis thaliana) GI:1872544; contains Pfam profile: PF00504 chlorophyll A-B binding protein; identical to cDNA early lig	0.642075	2.00436	7.59951e-05	0.00274793	AT3G22840	AT3G22840.1	chlorophyll A-B binding family protein / early light-induced protein (ELIP), identical to early light-induced protein; ELIP (Arabidopsis thaliana) GI:1872544; contains Pfam profile: PF00504 chlorophyll A-B binding protein; identical to cDNA early lig	1.20748	1.9492	8.6066e-08	4.70914e-06	AT3G22840	AT3G22840.1	chlorophyll A-B binding family protein / early light-induced protein (ELIP), identical to early light-induced protein; ELIP (Arabidopsis thaliana) GI:1872544; contains Pfam profile: PF00504 chlorophyll A-B binding protein; identical to cDNA early lig	0.624158	4.34414	4.11111e-05	0.00288442	AT3G22840	AT3G22840.1	chlorophyll A-B binding family protein / early light-induced protein (ELIP), identical to early light-induced protein; ELIP (Arabidopsis thaliana) GI:1872544; contains Pfam profile: PF00504 chlorophyll A-B binding protein; identical to cDNA early lig	AT3G22840	AT3G22840.1	chlorophyll A-B binding family protein / early light-induced protein (ELIP), identical to early light-induced protein; ELIP (Arabidopsis thaliana) GI:1872544; contains Pfam profile: PF00504 chlorophyll A-B binding protein; identical to cDNA early lig	1.08266	3.00894	2.0458	49.0282
CATMA2a22170	1.13676	1.60228	1.11784	0.707176	0.409986	1.10183	0.53112	0.36637	0.0310001	AT2G23810	AT2G23810.1	similar to senescence-associated family protein [Arabidopsis thaliana] (TAIR:At4g30430.1); similar to senescence-associated protein DH [Zea mays] (GB:AAV31120.1); contains InterPro domain CD9/CD37/CD63 antigen (InterPro:IPR000301)	0.80406	0.289937	2.70566e-13	1.93707e-10	AT2G23810	AT2G23810.1	similar to senescence-associated family protein [Arabidopsis thaliana] (TAIR:At4g30430.1); similar to senescence-associated protein DH [Zea mays] (GB:AAV31120.1); contains InterPro domain CD9/CD37/CD63 antigen (InterPro:IPR000301)	5.80266	1.96617	0.0423044	0.109288	AT2G23810	AT2G23810.1	similar to senescence-associated family protein [Arabidopsis thaliana] (TAIR:At4g30430.1); similar to senescence-associated protein DH [Zea mays] (GB:AAV31120.1); contains InterPro domain CD9/CD37/CD63 antigen (InterPro:IPR000301)	1.95915	0.46484	3.43301e-05	0.00266432	AT2G23810	AT2G23810.1	similar to senescence-associated family protein [Arabidopsis thaliana] (TAIR:At4g30430.1); similar to senescence-associated protein DH [Zea mays] (GB:AAV31120.1); contains InterPro domain CD9/CD37/CD63 antigen (InterPro:IPR000301)	AT2G23810	AT2G23810.1	similar to senescence-associated family protein [Arabidopsis thaliana] (TAIR:At4g30430.1); similar to senescence-associated protein DH [Zea mays] (GB:AAV31120.1); contains InterPro domain CD9/CD37/CD63 antigen (InterPro:IPR000301)	2.254	0.87398	1.56399	49.0228
CATMA4a14230	2.15526	1.24329	0.355901	0.0609663	0.704806	0.65502	0.314299	0.105958	1.06747e-07	AT4G14020	AT4G14020.1	rapid alkalinization factor (RALF) family protein	0.615438	0.372508	0.000116883	0.00389126	AT4G14020	AT4G14020.1	rapid alkalinization factor (RALF) family protein	1.00715	0.606726	1.55944e-07	7.66648e-06	AT4G14020	AT4G14020.1	rapid alkalinization factor (RALF) family protein	0.693345	0.441619	0.44508	0.580677	AT4G14020	AT4G14020.1	rapid alkalinization factor (RALF) family protein	AT4G14020	AT4G14020.1	rapid alkalinization factor (RALF) family protein	0.842849	0.41821	0.63053	48.942
CATMA5a17440	1.12523	0.788978	0.196766	0.120434	2.46558	0.899741	0.313788	0.181678	6.15919e-05	AT5G19040	AT5G19040.1	adenylate isopentenyltransferase 5 / cytokinin synthase (IPT5), identical to adenylate isopentenyltransferase (IPT5) (Arabidopsis thaliana) GI:14279056	0.804699	0.569307	6.06058e-08	7.47368e-06	AT5G19040	AT5G19040.1	adenylate isopentenyltransferase 5 / cytokinin synthase (IPT5), identical to adenylate isopentenyltransferase (IPT5) (Arabidopsis thaliana) GI:14279056	0.705993	0.891927	2.97486e-05	0.000493683	AT5G19040	AT5G19040.1	adenylate isopentenyltransferase 5 / cytokinin synthase (IPT5), identical to adenylate isopentenyltransferase (IPT5) (Arabidopsis thaliana) GI:14279056	0.544799	0.681116	0.000319416	0.0082786	AT5G19040	AT5G19040.1	adenylate isopentenyltransferase 5 / cytokinin synthase (IPT5), identical to adenylate isopentenyltransferase (IPT5) (Arabidopsis thaliana) GI:14279056	AT5G19040	AT5G19040.1	adenylate isopentenyltransferase 5 / cytokinin synthase (IPT5), identical to adenylate isopentenyltransferase (IPT5) (Arabidopsis thaliana) GI:14279056	0.748842	0.530581	0.639711	48.9172
CATMA1a61170	2.5318	0.668322	0.611855	0.297957	2.77884	0.904384	0.940007	0.643367	8.77401e-07	AT1G71960	AT1G71960.1	ABC transporter family protein, similar to breast cancer resistance protein GB:AAC97367 from (Homo sapiens)	0.969878	0.582535	5.41989e-06	0.000306074	AT1G71960	AT1G71960.1	ABC transporter family protein, similar to breast cancer resistance protein GB:AAC97367 from (Homo sapiens)	1.07508	0.612036	8.08594e-06	0.000180443	AT1G71960	AT1G71960.1	ABC transporter family protein, similar to breast cancer resistance protein GB:AAC97367 from (Homo sapiens)	0.461522	0.500445	0.00552105	0.0417206	AT1G71960	AT1G71960.1	ABC transporter family protein, similar to breast cancer resistance protein GB:AAC97367 from (Homo sapiens)	AT1G71960	AT1G71960.1	ABC transporter family protein, similar to breast cancer resistance protein GB:AAC97367 from (Homo sapiens)	0.815837	0.649376	0.732606	48.8134
CATMA4a03876	0.698564	0.726138	0.383289	1.37143	0.188464	0.802919	0.25023	0.29873	9.93391e-05	AT4G03510	AT4G03510.1	zinc finger (C3HC4-type RING finger) family protein (RMA1), identical to RING zinc finger protein RMA1 gi:3164222	0.722751	0.233323	1.64944e-10	4.53035e-08	AT4G03510	AT4G03510.1	zinc finger (C3HC4-type RING finger) family protein (RMA1), identical to RING zinc finger protein RMA1 gi:3164222	0.800164	0.554241	8.02977e-05	0.00105216	AT4G03510	AT4G03510.1	zinc finger (C3HC4-type RING finger) family protein (RMA1), identical to RING zinc finger protein RMA1 gi:3164222	0.55592	0.52707	0.376995	0.522103	AT4G03510	AT4G03510.1	zinc finger (C3HC4-type RING finger) family protein (RMA1), identical to RING zinc finger protein RMA1 gi:3164222	AT4G03510	AT4G03510.1	zinc finger (C3HC4-type RING finger) family protein (RMA1), identical to RING zinc finger protein RMA1 gi:3164222	0.721578	0.389631	0.555604	48.5231
CATMA4a18370	0.960091	0.665366	0.663143	0.0666234	4.74744	2.61058	0.599244	0.223914	3.78126e-07	AT4G17340	AT4G17340.1	major intrinsic family protein / MIP family protein, contains Pfam profile: MIP PF00230	1.00293	0.395492	0.0486817	0.22646	AT4G17340	AT4G17340.1	major intrinsic family protein / MIP family protein, contains Pfam profile: MIP PF00230	1.27257	0.510838	2.82768e-07	1.2795e-05	AT4G17340	AT4G17340.1	major intrinsic family protein / MIP family protein, contains Pfam profile: MIP PF00230	0.582219	0.21302	2.62659e-05	0.00236755	AT4G17340	AT4G17340.1	major intrinsic family protein / MIP family protein, contains Pfam profile: MIP PF00230	AT4G17340	AT4G17340.1	major intrinsic family protein / MIP family protein, contains Pfam profile: MIP PF00230	1.22673	0.476347	0.85154	48.4538
CATMA5a47120	0.457944	0.649179	0.300689	0.334192	0.0233676	0.433861	0.114192	0.0776524	3.7641e-05	AT5G51190	AT5G51190.1	encodes a member of the ERF (ethylene response factor) subfamily B-3 of ERF/AP2 transcription factor family. The protein contains one AP2 domain. There are 18 members in this subfamily including ATERF-1, ATERF-2, AND ATERF-5.	0.84018	0.252313	3.49451e-09	6.39865e-07	AT5G51190	AT5G51190.1	encodes a member of the ERF (ethylene response factor) subfamily B-3 of ERF/AP2 transcription factor family. The protein contains one AP2 domain. There are 18 members in this subfamily including ATERF-1, ATERF-2, AND ATERF-5.	74.837	0.989268	1.82308e-05	0.000337841	AT5G51190	AT5G51190.1	encodes a member of the ERF (ethylene response factor) subfamily B-3 of ERF/AP2 transcription factor family. The protein contains one AP2 domain. There are 18 members in this subfamily including ATERF-1, ATERF-2, AND ATERF-5.	0.511901	0.277872	0.192716	0.34183	AT5G51190	AT5G51190.1	encodes a member of the ERF (ethylene response factor) subfamily B-3 of ERF/AP2 transcription factor family. The protein contains one AP2 domain. There are 18 members in this subfamily including ATERF-1, ATERF-2, AND ATERF-5.	AT5G51190	AT5G51190.1	encodes a member of the ERF (ethylene response factor) subfamily B-3 of ERF/AP2 transcription factor family. The protein contains one AP2 domain. There are 18 members in this subfamily including ATERF-1, ATERF-2, AND ATERF-5.	15.4544	0.386867	7.92064	48.3531
CATMA3a24400	0.140155	0.796942	1.09688	1.08396	0.258612	1.29316	0.82838	0.906794	1.59867e-10	AT3G24503	ALDH2C4	Arabidopsis thaliana aldehyde dehydrogenase AtALDH1a mRNA. a sinapaldehyde dehydrogenase	0.885781	0.796638	0.408133	0.672524	AT3G24503	ALDH2C4	Arabidopsis thaliana aldehyde dehydrogenase AtALDH1a mRNA. a sinapaldehyde dehydrogenase	0.866791	0.787584	1.35264e-05	0.000266795	AT3G24503	ALDH2C4	Arabidopsis thaliana aldehyde dehydrogenase AtALDH1a mRNA. a sinapaldehyde dehydrogenase	1.09303	1.54626	0.0248193	0.0986241	AT3G24503	ALDH2C4	Arabidopsis thaliana aldehyde dehydrogenase AtALDH1a mRNA. a sinapaldehyde dehydrogenase	AT3G24503	ALDH2C4	Arabidopsis thaliana aldehyde dehydrogenase AtALDH1a mRNA. a sinapaldehyde dehydrogenase	0.987142	1.01115	0.999145	48.3286
CATMA1a19040	1.43647	0.713507	1.10692	8.9379	0.453853	0.835491	0.500544	0.374364	0.000151977	AT1G20030	AT1G20030.1	pathogenesis-related thaumatin family protein, similar to receptor serine/threonine kinase PR5K (Arabidopsis thaliana) GI:1235680; contains Pfam profile PF00314: Thaumatin family	1.83196	0.63214	1.82413e-07	1.9004e-05	AT1G20030	AT1G20030.1	pathogenesis-related thaumatin family protein, similar to receptor serine/threonine kinase PR5K (Arabidopsis thaliana) GI:1235680; contains Pfam profile PF00314: Thaumatin family	1.29469	0.594716	1.35226e-06	4.3759e-05	AT1G20030	AT1G20030.1	pathogenesis-related thaumatin family protein, similar to receptor serine/threonine kinase PR5K (Arabidopsis thaliana) GI:1235680; contains Pfam profile PF00314: Thaumatin family	0.876882	0.150174	0.00206475	0.0231988	AT1G20030	AT1G20030.1	pathogenesis-related thaumatin family protein, similar to receptor serine/threonine kinase PR5K (Arabidopsis thaliana) GI:1235680; contains Pfam profile PF00314: Thaumatin family	AT1G20030	AT1G20030.1	pathogenesis-related thaumatin family protein, similar to receptor serine/threonine kinase PR5K (Arabidopsis thaliana) GI:1235680; contains Pfam profile PF00314: Thaumatin family	1.11051	0.596899	0.853703	48.2771
CATMA1a31210	0.543089	0.711425	0.346601	0.444369	0.0743079	0.506439	0.302536	0.192505	1.561e-09	AT1G32920	AT1G32920.1	expressed protein	0.60032	0.380855	2.18436e-06	0.000145852	AT1G32920	AT1G32920.1	expressed protein	2.23327	0.678341	0.00272611	0.0150102	AT1G32920	AT1G32920.1	expressed protein	0.770874	0.871088	0.859958	0.90081	AT1G32920	AT1G32920.1	expressed protein	AT1G32920	AT1G32920.1	expressed protein	0.964466	0.515884	0.740175	48.2067
CATMA3a55880	0.575701	0.594121	0.306988	0.586967	0.159505	0.702437	0.357005	0.624577	5.38056e-06	AT3G62720	AT3G62720.1	galactosyl transferase GMA12/MNN10 family protein, low similarity to alpha-1,2-galactosyltransferase, Schizosaccharomyces pombe (SP|Q09174)	1.02141	0.798531	0.00363804	0.046784	AT3G62720	AT3G62720.1	galactosyl transferase GMA12/MNN10 family protein, low similarity to alpha-1,2-galactosyltransferase, Schizosaccharomyces pombe (SP|Q09174)	2.06499	0.890952	9.72686e-08	5.19176e-06	AT3G62720	AT3G62720.1	galactosyl transferase GMA12/MNN10 family protein, low similarity to alpha-1,2-galactosyltransferase, Schizosaccharomyces pombe (SP|Q09174)	0.62371	0.213648	3.7738e-05	0.00277384	AT3G62720	AT3G62720.1	galactosyl transferase GMA12/MNN10 family protein, low similarity to alpha-1,2-galactosyltransferase, Schizosaccharomyces pombe (SP|Q09174)	AT3G62720	AT3G62720.1	galactosyl transferase GMA12/MNN10 family protein, low similarity to alpha-1,2-galactosyltransferase, Schizosaccharomyces pombe (SP|Q09174)	1.00134	0.513425	0.75738	47.9709
CATMA1a53790	4.85196	0.268455	0.702174	4.90389	1.53744	1.39478	1.70094	3.62997	2.13333e-06	AT1G64500	AT1G64500.1	glutaredoxin family protein	0.388484	0.655321	0.706506	0.861827	AT1G64500	AT1G64500.1	glutaredoxin family protein	1.19406	0.907374	1.57478e-10	3.26879e-08	AT1G64500	AT1G64500.1	glutaredoxin family protein	0.682993	3.3788	0.0124145	0.0657402	AT1G64500	AT1G64500.1	glutaredoxin family protein	AT1G64500	AT1G64500.1	glutaredoxin family protein	0.785754	1.46892	1.12734	47.8467
CATMA1a31830	2.0204	1.14989	0.601915	1.39393	0.403667	0.593581	0.738705	1.00734	0.0921126	AT1G33560	ADR1	Encodes a NBS-LRR disease resistance protein that possesses N-terminal kinase subdomains. Activation tagged mutant of ADR1 showed elevated levels of SA and reactive oxygen species in addition to number of defense gene transcripts. Exhibits resistanc	1.12939	0.823095	0.158239	0.423268	AT1G33560	ADR1	Encodes a NBS-LRR disease resistance protein that possesses N-terminal kinase subdomains. Activation tagged mutant of ADR1 showed elevated levels of SA and reactive oxygen species in addition to number of defense gene transcripts. Exhibits resistanc	1.98104	2.2436	9.29765e-16	8.71201e-13	AT1G33560	ADR1	Encodes a NBS-LRR disease resistance protein that possesses N-terminal kinase subdomains. Activation tagged mutant of ADR1 showed elevated levels of SA and reactive oxygen species in addition to number of defense gene transcripts. Exhibits resistanc	0.906827	0.525589	0.0361848	0.125169	AT1G33560	ADR1	Encodes a NBS-LRR disease resistance protein that possesses N-terminal kinase subdomains. Activation tagged mutant of ADR1 showed elevated levels of SA and reactive oxygen species in addition to number of defense gene transcripts. Exhibits resistanc	AT1G33560	ADR1	Encodes a NBS-LRR disease resistance protein that possesses N-terminal kinase subdomains. Activation tagged mutant of ADR1 showed elevated levels of SA and reactive oxygen species in addition to number of defense gene transcripts. Exhibits resistanc	1.15215	0.986581	1.06936	47.7409
CATMA4a29910	0.964341	0.588892	0.156443	0.847157	0.492311	0.374009	0.31522	0.325174	2.08466e-07	AT4G28270	AT4G28270.1	zinc finger (C3HC4-type RING finger) family protein, contains Pfam profile: PF00097 zinc finger, C3HC4 type (RING finger)	0.68881	0.357011	4.54747e-06	0.000265489	AT4G28270	AT4G28270.1	zinc finger (C3HC4-type RING finger) family protein, contains Pfam profile: PF00097 zinc finger, C3HC4 type (RING finger)	1.24148	0.721607	2.36908e-05	0.000412941	AT4G28270	AT4G28270.1	zinc finger (C3HC4-type RING finger) family protein, contains Pfam profile: PF00097 zinc finger, C3HC4 type (RING finger)	0.942057	0.707325	0.0743655	0.192517	AT4G28270	AT4G28270.1	zinc finger (C3HC4-type RING finger) family protein, contains Pfam profile: PF00097 zinc finger, C3HC4 type (RING finger)	AT4G28270	AT4G28270.1	zinc finger (C3HC4-type RING finger) family protein, contains Pfam profile: PF00097 zinc finger, C3HC4 type (RING finger)	0.76705	0.451521	0.609286	47.6915
CATMA4a25620	0.134718	0.304455	0.573268	0.501955	0.504439	0.454616	1.01079	0.538879	0.00290661	AT4G23800	AT4G23800.1	high mobility group (HMG1/2) family protein, similar to HMG2B (Homo sapiens) GI:32335; contains Pfam profile PF00505: HMG (high mobility group) box	0.587985	0.194782	2.98162e-08	4.04863e-06	AT4G23800	AT4G23800.1	high mobility group (HMG1/2) family protein, similar to HMG2B (Homo sapiens) GI:32335; contains Pfam profile PF00505: HMG (high mobility group) box	8.74548	0.927817	4.81027e-08	2.96716e-06	AT4G23800	AT4G23800.1	high mobility group (HMG1/2) family protein, similar to HMG2B (Homo sapiens) GI:32335; contains Pfam profile PF00505: HMG (high mobility group) box	0.76805	0.431184	0.0443346	0.141455	AT4G23800	AT4G23800.1	high mobility group (HMG1/2) family protein, similar to HMG2B (Homo sapiens) GI:32335; contains Pfam profile PF00505: HMG (high mobility group) box	AT4G23800	AT4G23800.1	high mobility group (HMG1/2) family protein, similar to HMG2B (Homo sapiens) GI:32335; contains Pfam profile PF00505: HMG (high mobility group) box	2.17212	0.627569	1.39984	47.5246
CATMA2a40020	0.44405	0.814374	0.181576	0.162331	0.420134	0.874281	0.334131	0.38344	6.43028e-05	AT2G41640	AT2G41640.1	expressed protein, contains Pfam domain, PF04577: Protein of unknown function (DUF563)	0.554764	0.300893	3.27162e-10	8.06889e-08	AT2G41640	AT2G41640.1	expressed protein, contains Pfam domain, PF04577: Protein of unknown function (DUF563)	5.27952	0.617893	0.00717294	0.0300556	AT2G41640	AT2G41640.1	expressed protein, contains Pfam domain, PF04577: Protein of unknown function (DUF563)	1.54628	0.232514	0.00367483	0.0329147	AT2G41640	AT2G41640.1	expressed protein, contains Pfam domain, PF04577: Protein of unknown function (DUF563)	AT2G41640	AT2G41640.1	expressed protein, contains Pfam domain, PF04577: Protein of unknown function (DUF563)	1.81384	0.333401	1.07362	47.4692
CATMA2a39795	0.262375	0.502533	0.267775	0.799929	0.130756	0.499475	0.404534	0.459696	2.76895e-10	AT2G41430	AT2G41430.1	dehydration-induced protein (ERD15), identical to dehydration-induced protein ERD15 GI:710626 from (Arabidopsis thaliana)	1.11587	0.65867	0.000180545	0.00530872	AT2G41430	AT2G41430.1	dehydration-induced protein (ERD15), identical to dehydration-induced protein ERD15 GI:710626 from (Arabidopsis thaliana)	0.943199	0.98852	0.173922	0.297072	AT2G41430	AT2G41430.1	dehydration-induced protein (ERD15), identical to dehydration-induced protein ERD15 GI:710626 from (Arabidopsis thaliana)	1.44122	0.608329	0.00066707	0.0123135	AT2G41430	AT2G41430.1	dehydration-induced protein (ERD15), identical to dehydration-induced protein ERD15 GI:710626 from (Arabidopsis thaliana)	AT2G41430	AT2G41430.1	dehydration-induced protein (ERD15), identical to dehydration-induced protein ERD15 GI:710626 from (Arabidopsis thaliana)	0.900461	0.585566	0.743013	47.4021
CATMA1a58850	0.88855	1.51753	2.17762	13.2301	0.925614	1.00046	1.26797	4.16486	2.28838e-06	AT1G69530	AT1G69530.1	expansin, putative (EXP1), identical to expansin (At-EXP1) (Arabidopsis thaliana) GI:1041702; alpha-expansin gene family, PMID:11641069	1.84062	2.06834	0.011731	0.0987253	AT1G69530	AT1G69530.1	expansin, putative (EXP1), identical to expansin (At-EXP1) (Arabidopsis thaliana) GI:1041702; alpha-expansin gene family, PMID:11641069	2.2185	1.42487	5.9764e-08	3.58502e-06	AT1G69530	AT1G69530.1	expansin, putative (EXP1), identical to expansin (At-EXP1) (Arabidopsis thaliana) GI:1041702; alpha-expansin gene family, PMID:11641069	0.811897	4.70334	0.000253007	0.00732168	AT1G69530	AT1G69530.1	expansin, putative (EXP1), identical to expansin (At-EXP1) (Arabidopsis thaliana) GI:1041702; alpha-expansin gene family, PMID:11641069	AT1G69530	AT1G69530.1	expansin, putative (EXP1), identical to expansin (At-EXP1) (Arabidopsis thaliana) GI:1041702; alpha-expansin gene family, PMID:11641069	1.4778	2.32843	1.90311	47.2609
CATMA1a40250	0.134208	0.669218	0.37963	0.806087	0.615803	0.724515	0.961401	0.236176	0.0920001	AT1G49130	AT1G49130.1	zinc finger (B-box type) family protein, contains similarity to zinc finger protein GI:3618318 from (Oryza sativa)	1.22235	0.37496	1.16584e-09	2.42916e-07	AT1G49130	AT1G49130.1	zinc finger (B-box type) family protein, contains similarity to zinc finger protein GI:3618318 from (Oryza sativa)	0.539988	0.859886	8.30401e-09	7.0624e-07	AT1G49130	AT1G49130.1	zinc finger (B-box type) family protein, contains similarity to zinc finger protein GI:3618318 from (Oryza sativa)	2.40971	1.36199	0.230414	0.382518	AT1G49130	AT1G49130.1	zinc finger (B-box type) family protein, contains similarity to zinc finger protein GI:3618318 from (Oryza sativa)	AT1G49130	AT1G49130.1	zinc finger (B-box type) family protein, contains similarity to zinc finger protein GI:3618318 from (Oryza sativa)	1.11316	0.787573	0.950365	47.235
CATMA2a37060	0.113193	0.237877	0.292656	0.187786	0.705096	0.281314	0.430911	0.169765	0.000183093	AT2G38790	AT2G38790.1	expressed protein	1.07042	0.360524	1.03536e-08	1.66832e-06	AT2G38790	AT2G38790.1	expressed protein	3.70964	0.678326	0.000109083	0.00132984	AT2G38790	AT2G38790.1	expressed protein	1.00303	0.258412	0.000958268	0.0150926	AT2G38790	AT2G38790.1	expressed protein	AT2G38790	AT2G38790.1	expressed protein	1.26045	0.404166	0.83231	47.2129
CATMA5a36060	0.96859	1.37592	5.29908	2.59801	2.35065	2.99201	2.42958	2.49003	0.000460614	AT5G40390	AT5G40390.1	raffinose synthase family protein, similar to galactinol-raffinose galactosyltransferase (Vigna angularis) GI:6634701, seed imbibition protein GB:AAA32975 GI:167100 from (Hordeum vulgare); contains Pfam profile PF05691: Raffinose synthase or seed imb	0.69018	1.48107	4.56808e-05	0.00184018	AT5G40390	AT5G40390.1	raffinose synthase family protein, similar to galactinol-raffinose galactosyltransferase (Vigna angularis) GI:6634701, seed imbibition protein GB:AAA32975 GI:167100 from (Hordeum vulgare); contains Pfam profile PF05691: Raffinose synthase or seed imb	2.1895	2.16162	1.19153e-06	3.95474e-05	AT5G40390	AT5G40390.1	raffinose synthase family protein, similar to galactinol-raffinose galactosyltransferase (Vigna angularis) GI:6634701, seed imbibition protein GB:AAA32975 GI:167100 from (Hordeum vulgare); contains Pfam profile PF05691: Raffinose synthase or seed imb	0.653778	1.7256	2.6424e-07	0.000193201	AT5G40390	AT5G40390.1	raffinose synthase family protein, similar to galactinol-raffinose galactosyltransferase (Vigna angularis) GI:6634701, seed imbibition protein GB:AAA32975 GI:167100 from (Hordeum vulgare); contains Pfam profile PF05691: Raffinose synthase or seed imb	AT5G40390	AT5G40390.1	raffinose synthase family protein, similar to galactinol-raffinose galactosyltransferase (Vigna angularis) GI:6634701, seed imbibition protein GB:AAA32975 GI:167100 from (Hordeum vulgare); contains Pfam profile PF05691: Raffinose synthase or seed imb	1.58028	2.61939	2.09983	47.1338
CATMA1a18220	0.808377	1.18507	1.43532	0.320188	1.04875	1.31932	0.714688	0.584708	0.000527241	AT1G19180	AT1G19180.1	expressed protein	0.690945	0.543382	3.77457e-08	5.0684e-06	AT1G19180	AT1G19180.1	expressed protein	3.84317	0.506304	1.60867e-07	7.84945e-06	AT1G19180	AT1G19180.1	expressed protein	0.974136	0.363439	0.213404	0.364377	AT1G19180	AT1G19180.1	expressed protein	AT1G19180	AT1G19180.1	expressed protein	1.60253	0.712626	1.15758	46.8948
CATMA1a27610	0.920562	0.809816	0.722973	0.918813	0.427192	0.74561	0.61898	1.03448	0.00975808	AT1G29690	AT1G29690.1	Encodes a protein containing a domain with significant homology to the MACPF (membrane attack complex and perforin) domain of complements and perforin proteins that are involved in innate immunity in animals. Transgenic <i>cad1-1</i> mutant plants sh	1.05146	0.91244	0.00016222	0.0049905	AT1G29690	AT1G29690.1	Encodes a protein containing a domain with significant homology to the MACPF (membrane attack complex and perforin) domain of complements and perforin proteins that are involved in innate immunity in animals. Transgenic <i>cad1-1</i> mutant plants sh	4.45847	1.63306	3.42811e-11	8.96588e-09	AT1G29690	AT1G29690.1	Encodes a protein containing a domain with significant homology to the MACPF (membrane attack complex and perforin) domain of complements and perforin proteins that are involved in innate immunity in animals. Transgenic <i>cad1-1</i> mutant plants sh	0.695461	0.299614	0.00160235	0.0199339	AT1G29690	AT1G29690.1	Encodes a protein containing a domain with significant homology to the MACPF (membrane attack complex and perforin) domain of complements and perforin proteins that are involved in innate immunity in animals. Transgenic <i>cad1-1</i> mutant plants sh	AT1G29690	AT1G29690.1	Encodes a protein containing a domain with significant homology to the MACPF (membrane attack complex and perforin) domain of complements and perforin proteins that are involved in innate immunity in animals. Transgenic <i>cad1-1</i> mutant plants sh	1.55216	0.837413	1.19479	46.7073
CATMA3a29510	0.383851	0.911207	2.05198	2.28344	0.484086	0.588477	0.441476	0.931991	0.0760934	AT3G29330	AT3G29330.1	expressed protein	1.08046	4.81341	1.83902e-10	4.93878e-08	AT3G29330	AT3G29330.1	expressed protein	1.09159	2.56632	7.65312e-06	0.000173449	AT3G29330	AT3G29330.1	expressed protein	1.03596	1.87651	0.000803689	0.0135825	AT3G29330	AT3G29330.1	expressed protein	AT3G29330	AT3G29330.1	expressed protein	0.941538	2.34994	1.64574	46.6827
CATMA5a35230	1.15381	1.19519	1.50635	1.3744	1.69236	1.29966	1.9131	1.13453	0.00634633	AT5G39660	AT5G39660.1	Dof-type zinc finger domain-containing protein, identical to H-protein promoter binding factor-2a GI:3386546 from (Arabidopsis thaliana). Interacts with LKP2 and FKF1, but its overexpression does not change flowering time under short or long day cond	0.987935	0.703444	0.0208923	0.1385	AT5G39660	AT5G39660.1	Dof-type zinc finger domain-containing protein, identical to H-protein promoter binding factor-2a GI:3386546 from (Arabidopsis thaliana). Interacts with LKP2 and FKF1, but its overexpression does not change flowering time under short or long day cond	1.5139	1.57358	3.27322e-13	1.58533e-10	AT5G39660	AT5G39660.1	Dof-type zinc finger domain-containing protein, identical to H-protein promoter binding factor-2a GI:3386546 from (Arabidopsis thaliana). Interacts with LKP2 and FKF1, but its overexpression does not change flowering time under short or long day cond	2.24113	1.42133	0.0147208	0.0730728	AT5G39660	AT5G39660.1	Dof-type zinc finger domain-containing protein, identical to H-protein promoter binding factor-2a GI:3386546 from (Arabidopsis thaliana). Interacts with LKP2 and FKF1, but its overexpression does not change flowering time under short or long day cond	AT5G39660	AT5G39660.1	Dof-type zinc finger domain-containing protein, identical to H-protein promoter binding factor-2a GI:3386546 from (Arabidopsis thaliana). Interacts with LKP2 and FKF1, but its overexpression does not change flowering time under short or long day cond	1.44756	1.42356	1.43556	46.4809
CATMA1a06190	0.596478	0.888363	0.578147	0.252352	0.0369429	0.517355	0.295795	0.100786	4.35217e-05	AT1G07135	AT1G07135.1	glycine-rich protein	1.19598	0.181813	1.14333e-08	1.81805e-06	AT1G07135	AT1G07135.1	glycine-rich protein	3.47098	0.576908	0.0132671	0.0472348	AT1G07135	AT1G07135.1	glycine-rich protein	3.94561	0.278052	3.73223e-05	0.00275788	AT1G07135	AT1G07135.1	glycine-rich protein	AT1G07135	AT1G07135.1	glycine-rich protein	2.00366	0.382143	1.1929	46.4633
CATMA4a25630	0.184307	0.28015	0.467064	0.399928	1.12488	0.664209	1.21378	0.954098	0.034876	AT4G23800	AT4G23800.1	high mobility group (HMG1/2) family protein, similar to HMG2B (Homo sapiens) GI:32335; contains Pfam profile PF00505: HMG (high mobility group) box	0.480821	0.244612	1.16385e-09	2.42916e-07	AT4G23800	AT4G23800.1	high mobility group (HMG1/2) family protein, similar to HMG2B (Homo sapiens) GI:32335; contains Pfam profile PF00505: HMG (high mobility group) box	7.61632	0.965393	3.76783e-08	2.42719e-06	AT4G23800	AT4G23800.1	high mobility group (HMG1/2) family protein, similar to HMG2B (Homo sapiens) GI:32335; contains Pfam profile PF00505: HMG (high mobility group) box	0.978986	0.610343	0.389796	0.533344	AT4G23800	AT4G23800.1	high mobility group (HMG1/2) family protein, similar to HMG2B (Homo sapiens) GI:32335; contains Pfam profile PF00505: HMG (high mobility group) box	AT4G23800	AT4G23800.1	high mobility group (HMG1/2) family protein, similar to HMG2B (Homo sapiens) GI:32335; contains Pfam profile PF00505: HMG (high mobility group) box	2.0041	0.700238	1.35217	46.3738
CATMA5a42790	1.43301	0.850547	0.342701	0.857815	1.74582	0.772925	0.528646	0.78745	4.46119e-06	AT5G46780	AT5G46780.1	VQ motif-containing protein, contains PF05678: VQ motif	1.12276	0.808541	0.0228604	0.145175	AT5G46780	AT5G46780.1	VQ motif-containing protein, contains PF05678: VQ motif	1.83618	1.15154	5.52161e-09	5.19023e-07	AT5G46780	AT5G46780.1	VQ motif-containing protein, contains PF05678: VQ motif	0.59082	0.734806	0.00385014	0.0339379	AT5G46780	AT5G46780.1	VQ motif-containing protein, contains PF05678: VQ motif	AT5G46780	AT5G46780.1	VQ motif-containing protein, contains PF05678: VQ motif	1.03465	0.713248	0.873948	46.3169
CATMA2a14770	0.359644	0.694229	0.191224	0.595301	0.0942834	0.253631	0.196209	0.217494	2.99093e-06	AT2G15890	AT2G15890.1	expressed protein	0.885441	0.514771	4.34245e-07	3.97565e-05	AT2G15890	AT2G15890.1	expressed protein	1.00771	1.89992	3.69783e-05	0.000578427	AT2G15890	AT2G15890.1	expressed protein	2.09932	0.991168	0.0597829	0.168702	AT2G15890	AT2G15890.1	expressed protein	AT2G15890	AT2G15890.1	expressed protein	0.988066	0.758659	0.873363	46.2925
CATMA3a18210	1.83775	1.60062	0.910392	1.01702	2.69099	0.850556	2.1641	2.23423	0.00769549	AT3G18600	AT3G18600.1	DEAD/DEAH box helicase, putative, non-consensus acceptor splice site AT at exon 2; similar to DEAD box helicase protein GB:NP_006764 from (Homo sapiens), contains Pfam profile: PF00270 DEAD/DEAH box helicase	1.61409	3.3495	1.41563e-07	1.54125e-05	AT3G18600	AT3G18600.1	DEAD/DEAH box helicase, putative, non-consensus acceptor splice site AT at exon 2; similar to DEAD box helicase protein GB:NP_006764 from (Homo sapiens), contains Pfam profile: PF00270 DEAD/DEAH box helicase	1.00373	1.56125	1.76995e-08	1.3379e-06	AT3G18600	AT3G18600.1	DEAD/DEAH box helicase, putative, non-consensus acceptor splice site AT at exon 2; similar to DEAD box helicase protein GB:NP_006764 from (Homo sapiens), contains Pfam profile: PF00270 DEAD/DEAH box helicase	0.936024	2.1391	0.0151011	0.0741661	AT3G18600	AT3G18600.1	DEAD/DEAH box helicase, putative, non-consensus acceptor splice site AT at exon 2; similar to DEAD box helicase protein GB:NP_006764 from (Homo sapiens), contains Pfam profile: PF00270 DEAD/DEAH box helicase	AT3G18600	AT3G18600.1	DEAD/DEAH box helicase, putative, non-consensus acceptor splice site AT at exon 2; similar to DEAD box helicase protein GB:NP_006764 from (Homo sapiens), contains Pfam profile: PF00270 DEAD/DEAH box helicase	1.201	2.02487	1.61294	46.272
CATMA2a36270	1.1103	0.748423	1.52709	2.94647	1.30602	1.042	1.42351	2.71834	1.9879e-06	AT2G37970	AT2G37970.1	SOUL heme-binding family protein, weak similarity to SOUL protein (Mus musculus) GI:4886906; contains Pfam profile PF04832: SOUL heme-binding protein	0.817233	1.09527	0.629123	0.819672	AT2G37970	AT2G37970.1	SOUL heme-binding family protein, weak similarity to SOUL protein (Mus musculus) GI:4886906; contains Pfam profile PF04832: SOUL heme-binding protein	0.992397	1.45165	3.1764e-10	5.76914e-08	AT2G37970	AT2G37970.1	SOUL heme-binding family protein, weak similarity to SOUL protein (Mus musculus) GI:4886906; contains Pfam profile PF04832: SOUL heme-binding protein	1.09635	2.75808	0.0402354	0.133372	AT2G37970	AT2G37970.1	SOUL heme-binding family protein, weak similarity to SOUL protein (Mus musculus) GI:4886906; contains Pfam profile PF04832: SOUL heme-binding protein	AT2G37970	AT2G37970.1	SOUL heme-binding family protein, weak similarity to SOUL protein (Mus musculus) GI:4886906; contains Pfam profile PF04832: SOUL heme-binding protein	0.939281	1.65112	1.2952	46.1807
CATMA3a52390	0.98348	0.992687	1.07454	1.04166	0.124894	0.516245	0.433458	0.248948	5.81308e-05	AT3G59350	AT3G59350.1	serine/threonine protein kinase, putative, similar to Pto kinase interactor 1 (Pti1)(Lycopersicon esculentum) gi|3668069|gb|AAC61805	1.42561	0.737938	0.000139984	0.00445187	AT3G59350	AT3G59350.1	serine/threonine protein kinase, putative, similar to Pto kinase interactor 1 (Pti1)(Lycopersicon esculentum) gi|3668069|gb|AAC61805	0.505593	0.398089	4.96181e-07	1.98427e-05	AT3G59350	AT3G59350.1	serine/threonine protein kinase, putative, similar to Pto kinase interactor 1 (Pti1)(Lycopersicon esculentum) gi|3668069|gb|AAC61805	1.06353	0.410067	3.03051e-05	0.00250866	AT3G59350	AT3G59350.1	serine/threonine protein kinase, putative, similar to Pto kinase interactor 1 (Pti1)(Lycopersicon esculentum) gi|3668069|gb|AAC61805	AT3G59350	AT3G59350.1	serine/threonine protein kinase, putative, similar to Pto kinase interactor 1 (Pti1)(Lycopersicon esculentum) gi|3668069|gb|AAC61805	0.900733	0.610818	0.755775	46.1416
CATMA2a42060	0.558603	1.92232	1.23055	0.350372	3.3583	0.585556	2.4648	1.59482	0.0217132	AT2G43650	AT2G43650.1	Sas10/U3 ribonucleoprotein (Utp) family protein, contains Pfam profile PF04000: Sas10/Utp3 family; contains Prosite PS00761: Signal peptidases I signature 3; weak similarity to PEBP2 beta-binding protein / charged amino acid rich leucine zipper facto	1.80728	2.22032	7.76776e-06	0.000422853	AT2G43650	AT2G43650.1	Sas10/U3 ribonucleoprotein (Utp) family protein, contains Pfam profile PF04000: Sas10/Utp3 family; contains Prosite PS00761: Signal peptidases I signature 3; weak similarity to PEBP2 beta-binding protein / charged amino acid rich leucine zipper facto	1.07486	2.29934	2.12642e-10	4.34487e-08	AT2G43650	AT2G43650.1	Sas10/U3 ribonucleoprotein (Utp) family protein, contains Pfam profile PF04000: Sas10/Utp3 family; contains Prosite PS00761: Signal peptidases I signature 3; weak similarity to PEBP2 beta-binding protein / charged amino acid rich leucine zipper facto	2.42694	4.03282	0.00378482	0.0335323	AT2G43650	AT2G43650.1	Sas10/U3 ribonucleoprotein (Utp) family protein, contains Pfam profile PF04000: Sas10/Utp3 family; contains Prosite PS00761: Signal peptidases I signature 3; weak similarity to PEBP2 beta-binding protein / charged amino acid rich leucine zipper facto	AT2G43650	AT2G43650.1	Sas10/U3 ribonucleoprotein (Utp) family protein, contains Pfam profile PF04000: Sas10/Utp3 family; contains Prosite PS00761: Signal peptidases I signature 3; weak similarity to PEBP2 beta-binding protein / charged amino acid rich leucine zipper facto	1.56339	2.44957	2.00648	46.0873
CATMA3a23750	1.40455	0.622685	0.494675	0.114363	25.687	1.72908	1.13727	1.75137	1.37809e-05	AT3G23800	AT3G23800.1	selenium-binding family protein, contains Pfam profile: PF05694 56kDa selenium binding protein (SBP56)	0.964715	0.450594	3.30985e-06	0.000205983	AT3G23800	AT3G23800.1	selenium-binding family protein, contains Pfam profile: PF05694 56kDa selenium binding protein (SBP56)	2.08666	0.537982	0.00418673	0.0203457	AT3G23800	AT3G23800.1	selenium-binding family protein, contains Pfam profile: PF05694 56kDa selenium binding protein (SBP56)	0.609257	0.217247	4.43706e-07	0.000237191	AT3G23800	AT3G23800.1	selenium-binding family protein, contains Pfam profile: PF05694 56kDa selenium binding protein (SBP56)	AT3G23800	AT3G23800.1	selenium-binding family protein, contains Pfam profile: PF05694 56kDa selenium binding protein (SBP56)	1.20248	0.567553	0.885015	46.053
CATMA4a38060	0.397486	0.853131	1.19589	0.46603	0.416658	0.711968	0.689252	0.374079	0.000419533	AT4G36500	AT4G36500.1	expressed protein	0.728431	0.357161	4.44518e-11	1.49222e-08	AT4G36500	AT4G36500.1	expressed protein	3.37541	1.1431	0.00180161	0.0110046	AT4G36500	AT4G36500.1	expressed protein	2.19246	0.801822	0.0806073	0.201984	AT4G36500	AT4G36500.1	expressed protein	AT4G36500	AT4G36500.1	expressed protein	1.57228	0.837444	1.20486	46.0303
CATMA1a20080	0.519046	0.822957	0.818102	2.42431	0.200684	0.730884	0.572829	0.842284	4.31677e-06	AT1G21010	AT1G21010.1	expressed protein	0.955257	0.700137	5.43008e-06	0.000306074	AT1G21010	AT1G21010.1	expressed protein	3.25869	1.18478	9.80758e-06	0.000208543	AT1G21010	AT1G21010.1	expressed protein	1.2662	0.812523	0.00935084	0.0556087	AT1G21010	AT1G21010.1	expressed protein	AT1G21010	AT1G21010.1	expressed protein	1.4068	0.817675	1.11224	45.8914
CATMA1a68390	1.57897	1.33147	3.28533	0.82685	5.26252	1.71667	3.76269	2.71111	1.85343e-06	AT1G79270	AT1G79270.1	expressed protein, contains Pfam profile PF04146: YT521-B-like family	0.785334	1.09702	0.00648296	0.06885	AT1G79270	AT1G79270.1	expressed protein, contains Pfam profile PF04146: YT521-B-like family	0.772945	0.776087	1.03478e-07	5.45636e-06	AT1G79270	AT1G79270.1	expressed protein, contains Pfam profile PF04146: YT521-B-like family	1.23154	2.98953	0.00194779	0.022274	AT1G79270	AT1G79270.1	expressed protein, contains Pfam profile PF04146: YT521-B-like family	AT1G79270	AT1G79270.1	expressed protein, contains Pfam profile PF04146: YT521-B-like family	1.16759	2.38213	1.77486	45.8739
CATMA3a43085	1.3764	1.17833	0.564163	0.47807	0.172339	0.730055	0.286078	0.327438	0.00196104	AT3G50060	AT3G50060.1	myb family transcription factor, contains Pfam profile: PF00249 myb-like DNA-binding domain; identical to cDNA MYB-related protein (1107 bp) GI:1263096	1.11475	0.478292	1.19817e-06	9.11006e-05	AT3G50060	AT3G50060.1	myb family transcription factor, contains Pfam profile: PF00249 myb-like DNA-binding domain; identical to cDNA MYB-related protein (1107 bp) GI:1263096	5.58509	0.939253	1.6587e-09	2.10591e-07	AT3G50060	AT3G50060.1	myb family transcription factor, contains Pfam profile: PF00249 myb-like DNA-binding domain; identical to cDNA MYB-related protein (1107 bp) GI:1263096	1.3185	0.700477	0.321208	0.471943	AT3G50060	AT3G50060.1	myb family transcription factor, contains Pfam profile: PF00249 myb-like DNA-binding domain; identical to cDNA MYB-related protein (1107 bp) GI:1263096	AT3G50060	AT3G50060.1	myb family transcription factor, contains Pfam profile: PF00249 myb-like DNA-binding domain; identical to cDNA MYB-related protein (1107 bp) GI:1263096	1.98534	0.593653	1.2895	45.6787
CATMA3a43300	0.496126	1.07632	0.69377	0.519717	0.551248	1.28455	0.1849	0.336609	0.0704079	AT3G50260	AT3G50260.1	encodes a member of the DREB subfamily A-5 of ERF/AP2 transcription factor family. The protein contains one AP2 domain. There are 16 members in this subfamily including RAP2.1, RAP2.9 and RAP2.10.	1.03478	0.285166	6.53126e-08	7.97275e-06	AT3G50260	AT3G50260.1	encodes a member of the DREB subfamily A-5 of ERF/AP2 transcription factor family. The protein contains one AP2 domain. There are 16 members in this subfamily including RAP2.1, RAP2.9 and RAP2.10.	2.59369	0.761261	7.87116e-07	2.81233e-05	AT3G50260	AT3G50260.1	encodes a member of the DREB subfamily A-5 of ERF/AP2 transcription factor family. The protein contains one AP2 domain. There are 16 members in this subfamily including RAP2.1, RAP2.9 and RAP2.10.	1.298	0.141054	7.98433e-06	0.00117998	AT3G50260	AT3G50260.1	encodes a member of the DREB subfamily A-5 of ERF/AP2 transcription factor family. The protein contains one AP2 domain. There are 16 members in this subfamily including RAP2.1, RAP2.9 and RAP2.10.	AT3G50260	AT3G50260.1	encodes a member of the DREB subfamily A-5 of ERF/AP2 transcription factor family. The protein contains one AP2 domain. There are 16 members in this subfamily including RAP2.1, RAP2.9 and RAP2.10.	1.45747	0.41323	0.935349	45.6095
CATMA3a40240	0.580826	1.18475	0.777883	0.901688	0.561634	1.34967	0.745937	0.497391	0.00114534	AT3G47160	AT3G47160.1	expressed protein, similar to MTD2 (Medicago truncatula) GI:9294812; supporting cDNA gi|25083983|gb|BT002136.1|	0.869189	0.361198	7.02927e-07	6.11142e-05	AT3G47160	AT3G47160.1	expressed protein, similar to MTD2 (Medicago truncatula) GI:9294812; supporting cDNA gi|25083983|gb|BT002136.1|	0.854181	0.780416	3.10413e-07	1.37138e-05	AT3G47160	AT3G47160.1	expressed protein, similar to MTD2 (Medicago truncatula) GI:9294812; supporting cDNA gi|25083983|gb|BT002136.1|	1.80727	0.925237	0.00168249	0.0205569	AT3G47160	AT3G47160.1	expressed protein, similar to MTD2 (Medicago truncatula) GI:9294812; supporting cDNA gi|25083983|gb|BT002136.1|	AT3G47160	AT3G47160.1	expressed protein, similar to MTD2 (Medicago truncatula) GI:9294812; supporting cDNA gi|25083983|gb|BT002136.1|	1.21301	0.718134	0.965573	45.5264
CATMA1a24260	0.434639	0.988439	0.990476	1.45518	0.0684009	0.495901	0.252561	0.33733	0.000129952	AT1G25560	AT1G25560.1	AP2 domain-containing transcription factor, putative, similar to DNA-binding protein RAV2 GI:3868859 from (Arabidopsis thaliana)	0.565421	0.419606	1.09772e-06	8.61426e-05	AT1G25560	AT1G25560.1	AP2 domain-containing transcription factor, putative, similar to DNA-binding protein RAV2 GI:3868859 from (Arabidopsis thaliana)	1.19183	0.473508	4.13449e-07	1.73848e-05	AT1G25560	AT1G25560.1	AP2 domain-containing transcription factor, putative, similar to DNA-binding protein RAV2 GI:3868859 from (Arabidopsis thaliana)	0.436373	1.68859	0.0298976	0.11058	AT1G25560	AT1G25560.1	AP2 domain-containing transcription factor, putative, similar to DNA-binding protein RAV2 GI:3868859 from (Arabidopsis thaliana)	AT1G25560	AT1G25560.1	AP2 domain-containing transcription factor, putative, similar to DNA-binding protein RAV2 GI:3868859 from (Arabidopsis thaliana)	0.735592	0.764949	0.750271	45.4013
CATMA5a43920	0.579492	1.03062	3.58598	2.13564	1.89143	1.47867	0.764722	1.0579	0.759162	AT5G47950	AT5G47950.1	transferase family protein, similar to deacetylvindoline 4-O-acetyltransferase (Catharanthus roseus)(GI:4091808)(PMID:9681034), acetyl-CoA:benzylalcohol acetyltranferase (Clarkia concinna)(GI:6166328)(PMID:10588064)	1.13907	2.96825	6.66759e-07	5.88159e-05	AT5G47950	AT5G47950.1	transferase family protein, similar to deacetylvindoline 4-O-acetyltransferase (Catharanthus roseus)(GI:4091808)(PMID:9681034), acetyl-CoA:benzylalcohol acetyltranferase (Clarkia concinna)(GI:6166328)(PMID:10588064)	1.10548	1.73228	1.95814e-09	2.33273e-07	AT5G47950	AT5G47950.1	transferase family protein, similar to deacetylvindoline 4-O-acetyltransferase (Catharanthus roseus)(GI:4091808)(PMID:9681034), acetyl-CoA:benzylalcohol acetyltranferase (Clarkia concinna)(GI:6166328)(PMID:10588064)	1.09994	2.40778	2.18602e-05	0.00212365	AT5G47950	AT5G47950.1	transferase family protein, similar to deacetylvindoline 4-O-acetyltransferase (Catharanthus roseus)(GI:4091808)(PMID:9681034), acetyl-CoA:benzylalcohol acetyltranferase (Clarkia concinna)(GI:6166328)(PMID:10588064)	AT5G47950	AT5G47950.1	transferase family protein, similar to deacetylvindoline 4-O-acetyltransferase (Catharanthus roseus)(GI:4091808)(PMID:9681034), acetyl-CoA:benzylalcohol acetyltranferase (Clarkia concinna)(GI:6166328)(PMID:10588064)	1.17076	2.2918	1.73128	45.3617
CATMA5a57200	0.606213	0.652181	0.331945	0.598337	0.0317527	0.321629	0.119297	0.0920462	6.89105e-05	AT5G61600	AT5G61600.1	encodes a member of the ERF (ethylene response factor) subfamily B-3 of ERF/AP2 transcription factor family. The protein contains one AP2 domain. There are 18 members in this subfamily including ATERF-1, ATERF-2, AND ATERF-5.	0.953818	0.213143	2.08469e-11	8.12695e-09	AT5G61600	AT5G61600.1	encodes a member of the ERF (ethylene response factor) subfamily B-3 of ERF/AP2 transcription factor family. The protein contains one AP2 domain. There are 18 members in this subfamily including ATERF-1, ATERF-2, AND ATERF-5.	5.04843	0.548164	0.0128164	0.0461325	AT5G61600	AT5G61600.1	encodes a member of the ERF (ethylene response factor) subfamily B-3 of ERF/AP2 transcription factor family. The protein contains one AP2 domain. There are 18 members in this subfamily including ATERF-1, ATERF-2, AND ATERF-5.	0.598487	0.611816	0.831571	0.881577	AT5G61600	AT5G61600.1	encodes a member of the ERF (ethylene response factor) subfamily B-3 of ERF/AP2 transcription factor family. The protein contains one AP2 domain. There are 18 members in this subfamily including ATERF-1, ATERF-2, AND ATERF-5.	AT5G61600	AT5G61600.1	encodes a member of the ERF (ethylene response factor) subfamily B-3 of ERF/AP2 transcription factor family. The protein contains one AP2 domain. There are 18 members in this subfamily including ATERF-1, ATERF-2, AND ATERF-5.	1.51491	0.364873	0.939891	45.3195
CATMA3a24410	0.28558	0.85813	1.31179	1.22491	0.354836	1.35123	1.11297	0.754645	1.13843e-08	AT3G24503	ALDH2C4	Arabidopsis thaliana aldehyde dehydrogenase AtALDH1a mRNA. a sinapaldehyde dehydrogenase	0.665816	1.4327	0.48568	0.732867	AT3G24503	ALDH2C4	Arabidopsis thaliana aldehyde dehydrogenase AtALDH1a mRNA. a sinapaldehyde dehydrogenase	1.00953	1.09303	0.00193867	0.0116134	AT3G24503	ALDH2C4	Arabidopsis thaliana aldehyde dehydrogenase AtALDH1a mRNA. a sinapaldehyde dehydrogenase	0.868149	2.0217	3.99901e-07	0.000237191	AT3G24503	ALDH2C4	Arabidopsis thaliana aldehyde dehydrogenase AtALDH1a mRNA. a sinapaldehyde dehydrogenase	AT3G24503	ALDH2C4	Arabidopsis thaliana aldehyde dehydrogenase AtALDH1a mRNA. a sinapaldehyde dehydrogenase	0.950572	1.39444	1.1725	45.3065
CATMA3a15920	0.987372	0.79947	0.269599	0.565732	0.619241	0.653446	0.217853	0.321727	2.33797e-05	AT3G16510	AT3G16510.1	C2 domain-containing protein, contains similarity to shock protein SRC2 (Glycine max) gi|2055230|dbj|BAA19769 ; contains Pfam profile PF00168:C2 domain	1.22509	0.855008	0.000395844	0.00954564	AT3G16510	AT3G16510.1	C2 domain-containing protein, contains similarity to shock protein SRC2 (Glycine max) gi|2055230|dbj|BAA19769 ; contains Pfam profile PF00168:C2 domain	5.24759	0.99752	4.56751e-07	1.87239e-05	AT3G16510	AT3G16510.1	C2 domain-containing protein, contains similarity to shock protein SRC2 (Glycine max) gi|2055230|dbj|BAA19769 ; contains Pfam profile PF00168:C2 domain	0.56346	0.164383	0.000146155	0.00565225	AT3G16510	AT3G16510.1	C2 domain-containing protein, contains similarity to shock protein SRC2 (Glycine max) gi|2055230|dbj|BAA19769 ; contains Pfam profile PF00168:C2 domain	AT3G16510	AT3G16510.1	C2 domain-containing protein, contains similarity to shock protein SRC2 (Glycine max) gi|2055230|dbj|BAA19769 ; contains Pfam profile PF00168:C2 domain	1.69781	0.500872	1.09934	45.267
CATMA5a57960	0.100706	1.56034	0.885733	0.499812	0.119102	0.383146	0.535222	0.33033	4.60861e-05	AT5G62360	AT5G62360.1	invertase/pectin methylesterase inhibitor family protein, similar to pectinesterase from Arabidosis thaliana SP|Q42534, Lycopersicon esculentum SP|Q43143; contains Pfam profile PF04043: Plant invertase/pectin methylesterase inhibitor	3.56532	2.82042	0.0284063	0.166242	AT5G62360	AT5G62360.1	invertase/pectin methylesterase inhibitor family protein, similar to pectinesterase from Arabidosis thaliana SP|Q42534, Lycopersicon esculentum SP|Q43143; contains Pfam profile PF04043: Plant invertase/pectin methylesterase inhibitor	0.948905	0.827503	3.19164e-09	3.36589e-07	AT5G62360	AT5G62360.1	invertase/pectin methylesterase inhibitor family protein, similar to pectinesterase from Arabidosis thaliana SP|Q42534, Lycopersicon esculentum SP|Q43143; contains Pfam profile PF04043: Plant invertase/pectin methylesterase inhibitor	3.14258	2.5928	0.000421242	0.00936303	AT5G62360	AT5G62360.1	invertase/pectin methylesterase inhibitor family protein, similar to pectinesterase from Arabidosis thaliana SP|Q42534, Lycopersicon esculentum SP|Q43143; contains Pfam profile PF04043: Plant invertase/pectin methylesterase inhibitor	AT5G62360	AT5G62360.1	invertase/pectin methylesterase inhibitor family protein, similar to pectinesterase from Arabidosis thaliana SP|Q42534, Lycopersicon esculentum SP|Q43143; contains Pfam profile PF04043: Plant invertase/pectin methylesterase inhibitor	1.92006	1.53234	1.7262	45.2353
CATMA5a41430	1.735	1.04772	0.920127	0.542922	0.396327	0.829608	0.432465	0.319715	9.51236e-06	AT5G45490	AT5G45490.1	disease resistance protein-related, contains Pfam domain, PF00931: NB-ARC domain, a novel signalling motif found in plant resistance gene products	1.1954	0.763548	2.13068e-07	2.14577e-05	AT5G45490	AT5G45490.1	disease resistance protein-related, contains Pfam domain, PF00931: NB-ARC domain, a novel signalling motif found in plant resistance gene products	1.35148	1.04199	0.000110724	0.00134273	AT5G45490	AT5G45490.1	disease resistance protein-related, contains Pfam domain, PF00931: NB-ARC domain, a novel signalling motif found in plant resistance gene products	0.865872	0.63581	0.0243264	0.0976149	AT5G45490	AT5G45490.1	disease resistance protein-related, contains Pfam domain, PF00931: NB-ARC domain, a novel signalling motif found in plant resistance gene products	AT5G45490	AT5G45490.1	disease resistance protein-related, contains Pfam domain, PF00931: NB-ARC domain, a novel signalling motif found in plant resistance gene products	1.05802	0.758789	0.908402	45.0873
CATMA2a38220	0.24154	0.483676	0.0578571	0.203105	0.232658	0.677137	0.42086	0.46299	5.42336e-06	AT2G40000	AT2G40000.1	expressed protein	0.454243	0.213871	3.89824e-09	6.89673e-07	AT2G40000	AT2G40000.1	expressed protein	2.51937	0.697263	0.00146068	0.00948426	AT2G40000	AT2G40000.1	expressed protein	0.599381	0.819154	0.71681	0.797271	AT2G40000	AT2G40000.1	expressed protein	AT2G40000	AT2G40000.1	expressed protein	0.946762	0.441801	0.694282	45.0071
CATMA5a22070	0.384545	1.39175	1.48707	1.27219	0.167038	0.865341	0.395289	0.476739	2.05284e-07	AT5G24470	APRR5	Encodes a pseudo-response regulator whose mutation affects various circadian-associated biological events such as flowering time in the long-day photoperiod conditions, red light sensitivity of seedlings during early photomorphogenesis, and the perio	1.41834	0.585461	0.000428971	0.0101055	AT5G24470	APRR5	Encodes a pseudo-response regulator whose mutation affects various circadian-associated biological events such as flowering time in the long-day photoperiod conditions, red light sensitivity of seedlings during early photomorphogenesis, and the perio	1.01407	0.980141	6.00636e-07	2.29865e-05	AT5G24470	APRR5	Encodes a pseudo-response regulator whose mutation affects various circadian-associated biological events such as flowering time in the long-day photoperiod conditions, red light sensitivity of seedlings during early photomorphogenesis, and the perio	1.3786	0.729642	0.463353	0.59729	AT5G24470	APRR5	Encodes a pseudo-response regulator whose mutation affects various circadian-associated biological events such as flowering time in the long-day photoperiod conditions, red light sensitivity of seedlings during early photomorphogenesis, and the perio	AT5G24470	APRR5	Encodes a pseudo-response regulator whose mutation affects various circadian-associated biological events such as flowering time in the long-day photoperiod conditions, red light sensitivity of seedlings during early photomorphogenesis, and the perio	1.21362	0.835521	1.02457	44.9969
CATMA1a02240	0.710966	1.14764	1.15123	1.07737	0.661466	1.39931	2.02307	1.07479	0.000117171	AT1G03360	AT1G03360.1	exonuclease family protein, similar to Exosome complex exonuclease RRP4 (Ribosomal RNA processing protein 4)(SP:P38792) {Saccharomyces cerevisiae}	1.0193	1.43626	0.0327885	0.179896	AT1G03360	AT1G03360.1	exonuclease family protein, similar to Exosome complex exonuclease RRP4 (Ribosomal RNA processing protein 4)(SP:P38792) {Saccharomyces cerevisiae}	0.606396	1.37755	5.58059e-09	5.19023e-07	AT1G03360	AT1G03360.1	exonuclease family protein, similar to Exosome complex exonuclease RRP4 (Ribosomal RNA processing protein 4)(SP:P38792) {Saccharomyces cerevisiae}	1.87718	3.02465	5.22224e-05	0.00334319	AT1G03360	AT1G03360.1	exonuclease family protein, similar to Exosome complex exonuclease RRP4 (Ribosomal RNA processing protein 4)(SP:P38792) {Saccharomyces cerevisiae}	AT1G03360	AT1G03360.1	exonuclease family protein, similar to Exosome complex exonuclease RRP4 (Ribosomal RNA processing protein 4)(SP:P38792) {Saccharomyces cerevisiae}	1.20996	1.80255	1.50626	44.6361
CATMA4a26890	0.402079	2.0831	1.80072	1.12335	0.467206	1.98974	1.71352	1.38292	4.94778e-09	AT4G25210	AT4G25210.1	expressed protein, weak similarity to storekeeper protein (Solanum tuberosum) GI:14268476; contains Pfam profile PF04504: Protein of unknown function, DUF573	0.665617	1.03013	0.909587	0.962974	AT4G25210	AT4G25210.1	expressed protein, weak similarity to storekeeper protein (Solanum tuberosum) GI:14268476; contains Pfam profile PF04504: Protein of unknown function, DUF573	0.76802	1.17022	0.000303653	0.00290532	AT4G25210	AT4G25210.1	expressed protein, weak similarity to storekeeper protein (Solanum tuberosum) GI:14268476; contains Pfam profile PF04504: Protein of unknown function, DUF573	1.50138	2.17247	3.84534e-05	0.00281155	AT4G25210	AT4G25210.1	expressed protein, weak similarity to storekeeper protein (Solanum tuberosum) GI:14268476; contains Pfam profile PF04504: Protein of unknown function, DUF573	AT4G25210	AT4G25210.1	expressed protein, weak similarity to storekeeper protein (Solanum tuberosum) GI:14268476; contains Pfam profile PF04504: Protein of unknown function, DUF573	1.40157	1.57741	1.48949	44.5465
CATMA4a36430	4.28324	2.88502	3.96458	0.928691	2.93428	2.72084	2.54458	1.1731	0.000769325	AT4G34590	AT4G34590.1	bZIP transcription factor family protein, similar to common plant regulatory factor 7 GI:9650828 from (Petroselinum crispum)	1.18855	1.90371	0.00090298	0.0175168	AT4G34590	AT4G34590.1	bZIP transcription factor family protein, similar to common plant regulatory factor 7 GI:9650828 from (Petroselinum crispum)	1.41482	2.09851	1.29552e-10	2.82358e-08	AT4G34590	AT4G34590.1	bZIP transcription factor family protein, similar to common plant regulatory factor 7 GI:9650828 from (Petroselinum crispum)	0.700159	1.37647	0.0302367	0.111389	AT4G34590	AT4G34590.1	bZIP transcription factor family protein, similar to common plant regulatory factor 7 GI:9650828 from (Petroselinum crispum)	AT4G34590	AT4G34590.1	bZIP transcription factor family protein, similar to common plant regulatory factor 7 GI:9650828 from (Petroselinum crispum)	1.78188	2.37757	2.07972	44.4235
[truncated: 15,095 more rows]
