# Supplementary material for: Summarizing and exploring data of a decade of cytokinin-related transcriptomics
Source: Front Plant Sci. 2015 Feb 17;6:29. doi: 10.3389/fpls.2015.00029 (PMC4330702; doi:10.3389/fpls.2015.00029)
Supplement: Supplementary file 11 [file Table8.XLSX]

## Sheet: Legend
Supplementary Table 8
Summary of the analyses shown in Supplemental Table 6 and Supplemental Table 7
A Motif counts for promoters of the advanced core set of cytokinin-induced genes
B Motif counts for promoters of the control set of least likely cytokinin-induced genes
C Summary of the results from A and B
D Same as C, but transposed to facilitate further analysis

## Sheet: A CK-induced
Gene name	AAGATTTT	CATATATA	TATATATA	TATATATG	TATATTCC	TATATTTA	TGTATTTC	AAGATCAC	ACGATCCA	CACATGCA	CATATCGA	CCCATATC	CCTATTTA	AAGATCTT	ATAATGTC	ATCATAGA	ATGATACG	GAAATAGA	CAAATAAC	AACATAAT	AGTATAAA	TGTATTAA	AATATCAT	GATATGAA	Sum
AT1G03850	0	2	1	2	0	1	0	0	0	0	0	0	0	0	0	0	0	0	0	0	0	0	0	0	6
AT1G04250	1	0	0	0	0	3	0	0	0	1	0	1	0	0	1	0	0	0	0	0	1	0	0	0	8
AT1G10470	1	0	0	0	0	0	0	0	0	0	0	0	0	0	0	1	0	0	0	1	0	2	1	0	6
AT1G12740	1	0	0	0	0	0	0	0	0	0	0	1	1	1	1	0	0	0	0	0	0	0	0	0	5
AT1G13420	1	0	0	0	0	0	0	2	0	0	0	0	0	0	0	0	0	0	0	0	0	1	0	1	5
AT1G16530	0	2	3	2	0	0	1	0	0	0	0	0	0	2	0	0	0	0	0	0	1	0	0	1	12
AT1G17190	0	0	0	0	0	0	0	0	0	0	0	0	0	0	0	0	0	0	1	0	0	0	1	0	2
AT1G19050	3	0	0	0	0	0	0	0	0	0	0	0	0	2	0	0	0	0	1	0	1	0	0	0	7
AT1G28100	0	0	0	0	0	0	0	0	0	0	0	0	1	0	0	0	0	0	0	0	0	0	0	0	1
AT1G31320	0	0	0	0	0	1	0	0	0	0	0	0	0	0	0	0	0	0	0	0	1	0	0	0	2
AT1G58170	0	0	0	0	1	0	0	0	0	0	0	0	0	0	0	0	0	0	0	0	0	0	0	0	1
AT1G59940	1	0	0	0	0	0	0	0	0	0	0	0	0	0	0	0	0	0	0	0	0	0	0	0	1
AT1G66800	1	1	0	1	0	1	0	0	0	0	0	0	0	0	0	0	0	1	0	1	0	0	0	0	6
AT1G67110	1	1	0	1	0	2	0	0	0	0	0	0	0	0	0	0	0	0	0	1	1	0	0	0	7
AT1G69040	0	4	4	4	2	1	0	0	1	0	0	0	0	1	0	0	0	1	0	0	0	0	0	0	18
AT1G69530	0	0	0	0	0	1	0	0	0	0	1	0	0	0	0	0	0	0	0	0	0	0	1	0	3
AT1G72140	0	0	0	0	0	2	0	0	0	0	0	0	0	0	0	0	1	0	0	0	0	0	0	0	3
AT1G75440	1	1	1	1	0	0	0	0	0	0	0	0	0	1	0	0	0	0	0	0	0	0	0	0	5
AT1G75450	0	0	0	0	0	0	0	1	0	0	0	0	1	0	0	0	0	0	0	0	0	0	0	1	3
AT1G78120	1	0	0	0	0	0	0	0	0	0	0	0	0	0	0	1	0	1	1	0	0	2	0	0	6
AT2G01830	1	1	3	1	0	0	0	0	0	0	1	0	0	0	0	0	0	0	0	0	0	0	0	1	8
AT2G01890	0	1	0	1	0	0	0	0	0	0	0	0	0	0	0	0	0	0	0	0	0	0	0	0	2
AT2G17500	0	1	1	1	0	0	2	0	0	0	0	0	0	0	0	0	0	0	0	0	1	0	0	0	6
AT2G25160	1	2	1	2	0	0	0	0	1	0	0	1	0	0	1	0	0	0	0	0	1	0	0	0	10
AT2G34610	0	3	0	3	0	1	0	0	0	0	0	0	0	0	0	1	0	0	0	0	0	1	0	0	9
AT2G35980	0	0	0	0	0	1	0	0	0	0	0	0	0	0	0	0	0	0	0	1	0	0	0	0	2
AT2G38750	0	1	5	1	0	0	0	0	0	0	0	0	0	0	0	0	0	1	1	0	1	0	1	1	12
AT2G38760	0	0	0	0	0	2	0	1	0	0	0	0	0	0	0	0	1	1	0	0	0	0	2	1	8
AT2G40670	1	0	1	0	0	0	0	0	0	0	0	0	0	0	0	0	0	0	0	0	0	0	0	1	3
AT2G41310	2	0	3	0	0	0	0	0	1	1	0	0	0	0	0	0	1	0	0	0	1	0	0	0	9
AT2G46310	0	0	0	0	0	1	0	0	0	0	0	0	0	0	1	0	1	0	0	1	0	0	0	0	4
AT2G46660	0	1	1	1	0	0	0	0	0	0	0	0	0	0	0	1	0	0	0	0	0	0	0	0	4
AT3G29250	0	0	0	0	0	0	0	0	0	0	0	1	0	0	0	0	0	0	0	0	0	1	0	0	2
AT3G29575	0	0	0	0	0	1	0	0	0	0	0	0	0	0	0	1	0	0	0	0	0	0	0	0	2
AT3G44990	0	1	3	1	1	1	0	0	0	1	0	0	0	0	1	0	0	0	0	0	0	0	1	0	10
AT3G45070	0	0	1	0	0	0	1	0	0	0	0	0	0	0	1	0	0	0	2	1	0	0	1	0	7
AT3G45700	0	0	2	0	0	0	1	1	0	0	0	1	0	0	0	0	0	0	0	0	1	0	1	1	8
AT3G48100	1	0	0	0	0	0	1	0	0	0	0	1	0	0	0	0	1	0	0	0	0	0	0	0	4
AT3G50300	0	0	0	0	0	0	0	0	0	0	0	0	0	0	0	0	0	0	0	1	0	0	0	0	1
AT3G54720	0	1	3	1	0	0	0	0	0	0	0	0	0	0	0	0	0	0	0	0	0	0	0	0	5
AT3G57010	3	0	7	0	0	2	0	0	0	0	0	0	0	0	0	0	0	0	0	1	0	1	0	0	14
AT3G57040	2	0	1	0	0	0	0	0	0	0	0	0	0	0	0	0	0	0	0	0	0	0	0	0	3
AT3G62930	1	0	0	0	1	0	0	0	0	0	0	0	1	0	0	0	0	0	0	0	0	0	0	0	3
AT4G03610	2	0	1	0	1	1	0	0	0	0	0	0	0	0	0	0	1	0	0	0	0	0	1	0	7
AT4G11190	1	0	1	0	0	0	0	0	0	0	0	0	0	1	0	1	0	0	1	0	0	0	1	1	7
AT4G15660	0	0	1	0	0	0	1	0	0	0	0	0	0	0	1	0	0	0	0	0	0	1	0	0	4
AT4G15680	1	0	1	0	0	0	0	0	0	0	0	0	0	0	0	0	0	1	0	0	0	0	0	0	3
AT4G19030	0	0	2	0	0	0	1	0	0	1	1	0	1	0	0	0	1	0	0	0	0	0	0	0	7
AT4G23750	0	1	1	1	0	0	0	0	0	0	0	0	0	0	0	0	0	0	0	0	0	0	0	0	3
AT4G29690	0	0	4	0	0	0	0	0	0	0	1	0	0	0	0	0	0	0	0	0	0	1	0	1	7
AT4G29700	0	0	0	0	0	0	0	0	0	0	0	0	0	0	0	0	0	0	0	0	0	0	0	0	0
AT4G29740	0	2	9	2	0	0	0	0	0	1	0	0	0	0	0	0	0	0	0	0	0	0	0	0	14
AT5G05860	0	0	0	0	0	0	0	0	1	0	1	0	0	0	0	0	0	0	0	0	0	2	0	0	4
AT5G14070	1	2	4	2	2	0	0	0	0	0	0	0	1	0	0	0	0	0	0	0	0	0	1	0	13
AT5G19110	0	1	1	1	0	0	0	0	0	1	0	0	0	1	0	0	0	0	0	0	0	0	0	0	5
AT5G19260	1	0	0	0	0	0	0	0	0	0	0	0	0	0	0	0	0	0	0	0	0	0	0	0	1
AT5G26260	0	1	0	1	0	0	1	0	0	0	0	0	0	0	0	0	0	0	0	0	0	0	0	1	4
AT5G42590	0	1	0	1	0	0	0	0	0	0	0	0	0	0	0	0	0	0	1	0	0	0	0	0	3
AT5G47950	0	0	2	0	0	1	0	0	0	0	0	0	0	0	0	0	0	1	0	0	0	0	0	0	4
AT5G47980	1	0	0	0	0	0	0	0	0	0	1	0	0	0	0	0	0	0	1	1	0	0	0	0	4
AT5G47990	0	0	0	0	0	2	0	0	0	0	0	0	0	0	0	1	0	0	0	2	1	0	0	0	6
AT5G48000	0	1	3	1	0	0	0	0	0	0	0	0	0	0	0	0	0	0	0	0	1	0	0	0	6
AT5G48010	0	1	0	1	0	0	0	0	0	1	0	0	0	0	0	0	0	0	0	1	1	1	0	1	7
AT5G60890	1	0	0	0	0	0	0	1	0	0	0	0	0	0	1	0	0	0	1	0	0	0	0	0	4
AT5G62920	2	0	0	0	0	0	0	0	0	0	0	0	0	0	0	0	0	0	0	0	0	0	0	0	2
Sum	34	33	71	33	8	25	9	6	1	7	6	6	6	9	8	7	7	7	10	12	13	13	12	12	358
Average	0.523077	0.507692	1.09231	0.507692	0.123077	0.384615	0.138462	0.0923077	0.0153846	0.107692	0.0923077	0.0923077	0.0923077	0.138462	0.123077	0.107692	0.107692	0.107692	0.153846	0.184615	0.2	0.2	0.184615	0.184615	5.50769
SD	0.746431	0.825052	1.77784	0.825052	0.411664	0.694867	0.387375	0.338462	0.123077	0.309991	0.28946	0.28946	0.28946	0.425239	0.328525	0.309991	0.309991	0.309991	0.401182	0.425795	0.4	0.502302	0.425795	0.387985	3.60821
Test	0	0	0	0	0	0	0	0	0	0	0	0	0	0	0	0	0	0	0	0	0	0	0	0	OK

## Sheet: B least likely
Gene name	AAGATTTT	CATATATA	TATATATA	TATATATG	TATATTCC	TATATTTA	TGTATTTC	AAGATCAC	ACGATCCA	CACATGCA	CATATCGA	CCCATATC	CCTATTTA	AAGATCTT	ATAATGTC	ATCATAGA	ATGATACG	GAAATAGA	CAAATAAC	AACATAAT	AGTATAAA	TGTATTAA	AATATCAT	GATATGAA	Sum
AT1G01340	0	0	0	0	0	0	0	0	0	0	0	0	0	0	0	0	0	1	0	0	0	0	0	0	1
AT1G02840	1	0	0	0	0	0	0	0	0	0	0	0	0	0	0	0	0	0	0	0	0	0	0	0	1
AT1G04120	0	1	2	1	0	0	0	0	0	0	0	0	0	0	0	0	0	0	0	0	0	0	0	0	4
AT1G04410	0	0	1	0	0	0	0	0	0	0	0	0	0	0	0	0	0	0	0	0	1	0	0	0	2
AT1G07830	1	0	0	0	0	0	0	0	0	0	0	0	0	1	0	0	0	0	0	0	0	0	0	2	4
AT1G09810	0	0	3	0	0	1	0	0	0	0	0	0	0	0	0	0	0	0	0	0	0	0	0	0	4
AT1G13570	0	0	0	0	0	0	0	0	0	0	0	0	0	0	0	0	0	0	0	0	0	0	0	0	0
AT1G15200	0	0	0	0	0	0	0	0	0	0	0	0	1	0	0	0	0	0	0	0	0	0	0	0	1
AT1G19920	0	0	0	0	0	0	0	0	0	0	0	0	0	0	0	0	0	0	0	0	0	0	0	0	0
AT1G23260	1	0	1	0	0	0	0	0	0	0	0	0	0	0	0	0	0	0	0	0	0	0	0	0	2
AT1G32050	0	0	0	0	0	0	0	0	0	0	0	0	0	0	0	0	0	0	1	0	1	0	0	0	2
AT1G32210	0	1	0	1	0	0	0	0	0	0	0	0	0	0	0	0	0	0	0	0	0	0	0	0	2
AT1G32440	0	1	0	1	0	0	0	0	0	0	0	0	0	0	1	0	0	0	0	0	0	0	0	0	3
AT1G33110	1	0	0	0	0	0	0	0	0	0	0	0	0	0	0	0	0	0	0	0	0	0	0	0	1
AT1G33990	0	0	0	0	0	1	1	0	0	0	0	0	0	0	0	0	0	0	0	0	0	0	0	0	2
AT1G44760	2	0	0	0	0	0	0	0	0	0	0	0	0	0	0	0	0	0	0	0	0	0	0	0	2
AT1G45130	1	1	8	1	0	1	0	0	0	0	0	0	0	0	0	0	0	0	0	0	0	0	0	0	12
AT1G47250	0	0	0	0	0	0	0	0	0	0	0	0	0	0	0	0	0	0	0	0	0	0	1	0	1
AT1G49480	0	0	0	0	0	0	0	0	0	0	0	0	0	0	0	0	0	0	0	0	0	0	0	0	0
AT1G62970	0	0	0	0	0	0	0	0	0	0	0	0	0	0	0	0	0	0	0	0	0	1	0	0	1
AT1G63900	1	0	0	0	0	0	0	0	0	0	0	0	0	0	0	0	0	0	0	0	0	0	0	0	1
AT1G64385	1	0	0	0	0	0	0	0	0	0	0	0	0	0	0	0	0	0	0	0	0	0	0	0	1
AT1G68450	2	1	1	1	0	0	0	0	0	0	0	0	0	0	0	0	0	0	0	0	1	0	0	0	6
AT1G68940	1	0	1	0	0	0	0	0	0	0	0	0	0	0	0	0	0	0	0	0	0	0	0	0	2
AT1G70290	0	1	0	1	0	0	0	0	0	0	0	0	0	0	0	0	0	0	0	0	0	0	0	0	2
AT1G70580	1	0	0	0	0	0	0	0	0	0	0	0	0	0	0	0	0	0	0	0	0	0	0	0	1
AT1G72180	0	0	1	0	0	0	0	0	0	0	0	0	0	0	0	0	1	0	0	0	0	0	0	0	2
AT1G73600	0	0	0	0	0	0	0	0	0	0	0	0	0	0	0	0	0	0	0	0	0	0	0	0	0
AT1G73650	0	0	0	0	0	0	0	0	0	0	0	0	0	0	0	0	0	0	0	0	0	0	0	0	0
AT1G73720	0	0	0	0	0	0	0	0	0	0	0	0	0	0	0	0	0	0	0	0	0	0	0	1	1
AT1G74010	0	0	0	0	0	0	0	0	0	0	0	0	0	0	0	0	0	0	0	0	0	0	0	0	0
AT1G74330	0	0	1	0	1	0	0	0	0	0	0	0	0	0	0	0	0	0	0	0	0	1	0	0	3
AT1G76980	1	1	1	1	0	0	0	0	0	0	0	0	0	0	0	0	0	0	0	0	0	0	0	0	4
AT2G01260	0	1	0	1	0	0	0	0	0	0	0	0	0	0	0	0	0	0	0	0	0	0	0	0	2
AT2G17120	0	1	2	1	0	1	0	0	0	0	0	0	0	0	0	0	0	0	0	0	0	0	1	0	6
AT2G17280	0	0	0	0	0	0	0	0	0	0	0	0	0	0	0	0	1	0	0	0	0	0	0	0	1
AT2G26830	1	0	0	0	0	0	0	0	0	0	0	0	0	0	0	0	0	0	0	0	0	0	0	0	1
AT2G36130	0	0	0	0	0	0	0	0	0	0	0	0	0	0	0	0	0	0	0	0	0	0	0	0	0
AT2G38140	0	0	0	0	0	0	0	0	0	0	0	0	0	0	0	0	0	0	0	0	0	0	0	0	0
AT2G38880	0	0	0	0	0	0	0	0	0	0	0	0	0	0	1	1	0	0	0	1	0	0	0	0	3
AT2G43610	2	0	0	0	0	0	0	0	0	0	0	0	0	0	0	0	0	0	0	1	1	0	1	0	5
AT2G44100	0	0	0	0	0	0	0	0	0	0	0	0	0	0	0	0	0	0	0	0	0	0	0	0	0
AT2G44180	0	0	0	0	0	0	0	0	0	0	0	0	0	0	0	0	0	0	0	0	0	0	0	0	0
AT2G45470	0	0	0	0	0	2	1	0	0	0	0	0	0	0	0	0	0	0	0	0	0	0	0	0	3
AT2G45790	0	0	0	0	0	0	0	0	0	0	0	0	0	0	0	0	0	0	0	0	0	0	0	0	0
AT2G47730	0	0	0	0	0	0	0	0	0	0	0	0	0	0	0	0	0	0	0	0	0	0	0	0	0
AT3G01590	0	1	0	1	0	0	0	0	0	0	0	0	0	0	0	0	0	0	0	0	0	1	0	0	3
AT3G09880	0	0	0	0	0	0	0	0	0	0	0	0	0	0	0	0	0	0	0	0	0	0	0	0	0
AT3G09900	0	0	0	0	0	0	0	0	0	0	0	0	0	0	0	0	0	0	0	0	0	0	0	0	0
AT3G13225	0	0	0	0	0	0	0	0	0	0	0	0	0	0	0	0	0	0	0	0	0	0	0	0	0
AT3G15060	0	0	0	0	0	0	0	0	0	0	0	0	0	0	0	0	0	0	0	1	0	0	0	0	1
AT3G19460	0	0	0	0	0	0	0	0	0	0	0	0	0	0	0	0	0	0	0	0	0	0	0	0	0
AT3G27300	0	0	0	0	0	0	0	0	0	0	0	0	0	0	0	0	0	0	0	0	0	0	0	0	0
AT3G29390	1	1	0	1	0	0	0	0	0	0	0	0	0	0	0	0	0	0	0	0	0	0	0	0	3
AT3G44330	0	0	0	0	0	0	0	0	0	0	0	0	0	0	0	0	0	0	1	0	0	0	0	0	1
AT3G48690	0	0	0	0	0	0	0	0	0	0	0	0	0	0	0	0	0	0	0	0	0	0	0	0	0
AT3G48890	0	1	1	1	0	0	0	0	0	0	0	0	0	0	0	0	0	0	0	0	0	0	0	0	3
AT3G49560	0	1	0	1	0	0	0	0	0	0	0	0	0	0	0	0	0	0	0	0	0	0	1	0	3
AT3G51660	0	0	0	0	0	0	0	0	0	0	0	0	0	0	0	0	0	0	0	0	0	0	0	0	0
AT3G55380	1	0	0	0	0	0	0	0	0	0	0	0	0	0	0	0	0	0	0	0	0	0	0	0	1
AT3G59280	0	0	0	0	0	1	0	0	0	0	0	0	0	0	0	0	0	0	0	0	0	0	0	0	1
AT4G01870	0	0	0	0	0	0	0	0	0	0	0	0	0	0	0	0	0	0	0	0	0	0	0	0	0
AT4G02195	0	0	0	0	0	0	0	0	0	0	1	0	0	0	0	0	0	0	0	0	0	0	0	0	1
AT4G02480	0	0	0	0	0	0	0	0	0	0	0	0	0	0	0	0	0	0	0	0	0	0	0	0	0
AT4G08310	0	0	0	0	0	0	0	0	0	0	0	0	0	0	0	0	0	0	0	0	0	0	0	0	0
AT4G12570	0	0	0	0	0	0	0	0	0	0	0	0	0	0	0	0	0	0	0	0	1	0	0	0	1
AT4G13720	1	0	0	0	0	2	0	0	0	0	0	0	0	0	0	0	0	0	0	0	0	0	0	0	3
AT4G14950	0	0	0	0	0	0	0	0	0	0	0	0	0	0	0	0	0	0	0	0	0	1	0	0	1
AT4G15610	0	1	0	1	0	0	1	0	0	0	0	0	0	0	0	0	0	0	0	0	0	0	0	0	3
AT4G18360	0	0	0	0	0	0	0	0	0	0	0	0	0	0	0	0	0	0	0	0	0	0	0	0	0
AT4G21160	0	1	1	1	0	0	0	0	0	0	0	0	0	0	0	0	0	0	0	0	0	0	0	0	3
AT4G29390	0	0	0	0	0	0	0	0	0	0	0	0	0	0	0	0	0	0	0	0	0	0	0	0	0
AT4G30140	1	1	0	1	0	1	0	0	0	0	0	0	0	0	0	0	0	0	0	0	0	0	0	0	4
AT4G30260	0	0	2	0	0	0	0	0	0	0	0	0	0	0	0	0	0	0	0	0	0	0	0	0	2
AT4G35080	0	0	0	0	0	0	1	0	0	0	0	0	0	0	0	0	0	0	0	0	0	0	0	1	2
AT4G35570	0	0	0	0	0	0	0	0	0	0	0	0	0	0	0	0	0	0	0	0	0	0	0	0	0
AT4G39080	0	0	0	0	0	0	0	0	0	0	0	0	0	0	0	0	0	0	1	0	0	0	0	0	1
AT5G08415	0	0	0	0	0	0	0	0	0	0	0	0	0	0	0	0	0	0	0	0	0	0	0	0	0
AT5G08570	0	0	0	0	0	0	0	0	0	0	0	0	0	0	0	0	0	0	0	0	0	0	0	0	0
AT5G09320	1	0	1	0	0	0	0	0	0	0	0	0	0	0	0	0	0	0	0	0	0	1	0	0	3
AT5G09770	1	1	0	1	0	0	0	0	0	0	0	0	0	0	0	0	0	0	0	0	0	0	0	0	3
AT5G19440	0	0	0	0	0	0	0	0	0	0	0	0	0	0	0	0	0	0	0	0	0	0	0	0	0
AT5G19500	0	0	1	0	0	0	0	0	0	0	0	0	0	0	0	0	0	0	0	0	0	0	0	0	1
AT5G19550	0	0	0	0	0	0	0	0	0	0	0	0	0	0	0	0	0	0	0	0	0	0	0	1	1
AT5G20950	0	0	2	0	0	0	0	0	0	0	0	0	0	1	0	0	0	0	0	0	0	0	1	0	4
AT5G23740	0	0	0	0	0	0	0	0	0	1	0	0	0	0	0	0	0	0	0	0	0	0	0	0	1
AT5G28830	0	0	0	0	0	1	0	0	0	0	0	0	0	0	0	1	0	0	0	2	0	0	0	0	4
AT5G43600	0	0	0	0	0	0	0	0	0	0	0	0	0	0	0	0	0	0	0	0	0	1	0	0	1
AT5G43830	0	0	0	0	0	0	0	0	0	0	0	0	0	0	0	0	0	0	0	0	0	0	0	0	0
AT5G47660	0	0	0	0	0	1	0	0	0	0	0	0	0	0	0	0	0	0	0	0	0	0	0	0	1
AT5G53650	0	0	0	0	0	0	0	0	0	0	0	0	0	0	0	0	0	0	0	0	0	0	0	0	0
AT5G58380	0	0	0	0	0	0	0	0	0	0	0	0	0	0	0	0	0	0	0	0	0	0	1	0	1
AT5G59090	0	0	0	0	1	1	0	0	0	0	0	1	0	0	0	0	0	0	0	0	0	0	0	0	3
AT5G59480	0	0	3	0	0	0	0	0	0	0	0	0	0	0	0	0	0	0	0	0	0	0	0	0	3
AT5G59540	0	1	2	1	0	1	0	0	0	0	0	0	0	0	0	0	0	0	0	0	0	0	0	0	5
AT5G61060	0	0	0	0	0	0	0	0	0	0	0	0	0	0	0	0	0	0	0	0	0	0	0	0	0
AT5G63510	0	0	0	0	0	0	0	0	0	0	0	0	0	0	0	0	0	1	0	0	0	0	0	0	1
AT5G63870	0	0	0	0	0	0	0	0	0	0	0	0	0	0	0	0	0	0	0	0	0	0	0	0	0
AT5G64220	0	0	0	0	0	0	0	0	0	0	0	0	0	0	0	0	0	0	0	0	0	0	0	0	0
AT5G64240	0	0	1	0	0	1	0	0	0	0	0	0	0	0	0	0	0	0	0	0	0	0	0	0	2
AT5G64480	0	0	0	0	0	0	0	0	0	0	0	0	0	0	0	0	0	0	0	0	0	0	0	1	1
AT5G66490	0	0	0	0	0	0	0	0	0	0	0	0	0	0	0	0	0	0	0	0	0	0	0	0	0
AT5G66870	1	0	0	0	0	0	0	0	0	0	0	0	0	0	0	0	0	0	0	0	1	0	0	0	2
Summe	24	18	36	18	2	15	4	0	0	1	1	1	1	2	2	2	2	2	3	5	6	6	6	6	163
Average	0.23301	0.174757	0.349515	0.174757	0.0194175	0.145631	0.038835	0	0	0.00970874	0.00970874	0.00970874	0.00970874	0.0194175	0.0194175	0.0194175	0.0194175	0.0194175	0.0291262	0.0485437	0.0582524	0.0582524	0.0582524	0.0582524	1.58252
SD	0.486794	0.379759	0.992288	0.379759	0.137987	0.404051	0.193201	0	0	0.0980534	0.0980534	0.0980534	0.0980534	0.137987	0.137987	0.137987	0.137987	0.137987	0.16816	0.256134	0.23422	0.23422	0.23422	0.272537	1.81431

## Sheet: C Summary
Motif	AAGATTTT	CATATATA	TATATATA	TATATATG	TATATTCC	TATATTTA	TGTATTTC	AAGATCAC	ACGATCCA	CACATGCA	CATATCGA	CCCATATC	CCTATTTA	AAGATCTT	ATAATGTC	ATCATAGA	ATGATACG	GAAATAGA	CAAATAAC	AACATAAT	AGTATAAA	TGTATTAA	AATATCAT	GATATGAA	Sum
Sum CK-induced	34	33	71	33	8	25	9	6	1	7	6	6	6	9	8	7	7	7	10	12	13	13	12	12	358
Average CK-induced	0.523077	0.507692	1.09231	0.507692	0.123077	0.384615	0.138462	0.0923077	0.0153846	0.107692	0.0923077	0.0923077	0.0923077	0.138462	0.123077	0.107692	0.107692	0.107692	0.153846	0.184615	0.2	0.2	0.184615	0.184615	5.50769
SD CK-induced	0.746431	0.825052	1.77784	0.825052	0.411664	0.694867	0.387375	0.338462	0.123077	0.309991	0.28946	0.28946	0.28946	0.425239	0.328525	0.309991	0.309991	0.309991	0.401182	0.425795	0.4	0.502302	0.425795	0.387985	3.60821
Sum least likely	24	18	36	18	2	15	4	0	0	1	1	1	1	2	2	2	2	2	3	5	6	6	6	6	163
Average least likely	0.23301	0.174757	0.349515	0.174757	0.0194175	0.145631	0.038835	0	0	0.00970874	0.00970874	0.00970874	0.00970874	0.0194175	0.0194175	0.0194175	0.0194175	0.0194175	0.0291262	0.0485437	0.0582524	0.0582524	0.0582524	0.0582524	1.58252
SD least likely	0.486794	0.379759	0.992288	0.379759	0.137987	0.404051	0.193201	0	0	0.0980534	0.0980534	0.0980534	0.0980534	0.137987	0.137987	0.137987	0.137987	0.137987	0.16816	0.256134	0.23422	0.23422	0.23422	0.272537	1.81431
Enrichment	2.24487	2.90513	3.12521	2.90513	6.33846	2.64103	3.56538	NaN	NaN	11.0923	9.50769	9.50769	9.50769	7.13077	6.33846	5.54615	5.54615	5.54615	5.28205	3.80308	3.43333	3.43333	3.16923	3.16923	3.48032
p-value	0.00685544	0.00325034	0.00294881	0.00325034	0.0553777	0.0142364	0.0590733	0.0328018	0.0446081	0.0165923	0.0306021	0.0306021	0.0306021	0.0333564	0.0190008	0.0346952	0.0346952	0.0346952	0.0207474	0.0232109	0.0117233	0.0372383	0.0321767	0.024855	3.93233e-12

## Sheet: D Summary transposed
Motif	Sum CK-induced	Average CK-induced	SD CK-induced	Sum least likely	Average least likely	SD least likely	Enrichment	p-value
AACATAAT	12	0.184615	0.425795	5	0.0485437	0.256134	3.80308	0.0232109
AAGATCAC	6	0.0923077	0.338462	0	0	0	NaN	0.0328018
AAGATCTT	9	0.138462	0.425239	2	0.0194175	0.137987	7.13077	0.0333564
AAGATTTT	34	0.523077	0.746431	24	0.23301	0.486794	2.24487	0.00685544
AATATCAT	12	0.184615	0.425795	6	0.0582524	0.23422	3.16923	0.0321767
ACGATCCA	1	0.0153846	0.123077	0	0	0	NaN	0.0446081
AGTATAAA	13	0.2	0.4	6	0.0582524	0.23422	3.43333	0.0117233
ATAATGTC	8	0.123077	0.328525	2	0.0194175	0.137987	6.33846	0.0190008
ATCATAGA	7	0.107692	0.309991	2	0.0194175	0.137987	5.54615	0.0346952
ATGATACG	7	0.107692	0.309991	2	0.0194175	0.137987	5.54615	0.0346952
CAAATAAC	10	0.153846	0.401182	3	0.0291262	0.16816	5.28205	0.0207474
CACATGCA	7	0.107692	0.309991	1	0.00970874	0.0980534	11.0923	0.0165923
CATATATA	33	0.507692	0.825052	18	0.174757	0.379759	2.90513	0.00325034
CATATCGA	6	0.0923077	0.28946	1	0.00970874	0.0980534	9.50769	0.0306021
CCCATATC	6	0.0923077	0.28946	1	0.00970874	0.0980534	9.50769	0.0306021
CCTATTTA	6	0.0923077	0.28946	1	0.00970874	0.0980534	9.50769	0.0306021
GAAATAGA	7	0.107692	0.309991	2	0.0194175	0.137987	5.54615	0.0346952
GATATGAA	12	0.184615	0.387985	6	0.0582524	0.272537	3.16923	0.024855
TATATATA	71	1.09231	1.77784	36	0.349515	0.992288	3.12521	0.00294881
TATATATG	33	0.507692	0.825052	18	0.174757	0.379759	2.90513	0.00325034
TATATTCC	8	0.123077	0.411664	2	0.0194175	0.137987	6.33846	0.0553777
TATATTTA	25	0.384615	0.694867	15	0.145631	0.404051	2.64103	0.0142364
TGTATTAA	13	0.2	0.502302	6	0.0582524	0.23422	3.43333	0.0372383
TGTATTTC	9	0.138462	0.387375	4	0.038835	0.193201	3.56538	0.0590733
Sum	358	5.50769	3.60821	163	1.58252	1.81431	3.48032	3.93233e-12
