# Supplementary material for: Summarizing and exploring data of a decade of cytokinin-related transcriptomics
Source: Front Plant Sci. 2015 Feb 17;6:29. doi: 10.3389/fpls.2015.00029 (PMC4330702; doi:10.3389/fpls.2015.00029)
Supplement: Supplementary file 12 [file Table9.XLSX]

## Sheet: Legend
Supplementary Table 9
List of genes found significantly regulated (p ≤ 0.05, fold-change ≥ 2) in a meta-analysis of publicly available cytokinin-related microarray data obtained with the Affymetrix ATH1 array (Brenner et al. 2012).

## Sheet: Supplemental Table 9
Sequence.Derived.From	V1	E-GEOD-6832	E-GEOD-5698	E-GEOD-20232	E-GEOD-20231	E-MEXP-1573	E-MEXP-2270	E-GEOD-1766	E-ATMX-3	MetaStatistics	Average Ratio	Organism	Sequence.Type	Sequence.Description	Group.ID	Title	Gene.Symbol	References	Biological.Process..GO.	Cellular.Component..GO.	Molecular.Function..GO.	Pfam	BLOCKS	SCOP	TMM	Protein.Families	Protein.Similarities.BLASTP..GenBank.NR.	Type	Short_description	Curator_summary	Computational_description
AT1G74890	262212_at	2.29838e-16	3.24734e-13	2.28318e-09	0.000210696	0.00086119	9.67349e-15	0.00419818	2.2192e-05	214.447	6.90364	Arabidopsis thaliana	Exemplar	'response regulator 7, putative similar to response regulator 7 GI:3953603 from [Arabidopsis thaliana]; supported by cDNA: gi_11870064_gb_AF305720.1_AF305720 '	---	response regulator 7 -related	---	AGI:At1g74890	---	---	156 // two-component response regulator activity // extended:inferred from electronic annotation; response_reg; 1.1e-18	response_reg // Response regulator receiver domain;1.1e-18	IPB001867 // Transcriptional regulatory protein, C terminal;4.2e-05	---	---	---	15221927 // response regulator 5, putative protein id: At1g19050.1, supported by cDNA: gi_3953602 [Arabidopsis thaliana];2e-66 /// 15222035 // response regulator 7, putative protein id: At1g74890.1, supported by cDNA: gi_11870064 [Arabidopsis thaliana];e-108	protein_coding	response regulator 15	Encodes a nuclear response regulator that acts as a negative regulator in cytokinin-mediated signal transduction. Transcript accumulates in leaves and roots in response to cytokinin treatment.	response regulator 15 (ARR15); CONTAINS InterPro DOMAIN/s: CheY-like (InterPro:IPR011006), Signal transduction response regulator, receiver domain (InterPro:IPR001789); BEST Arabidopsis thaliana protein match is: response regulator 7 (TAIR:AT1G19050.1); Has 46084 Blast hits to 45371 proteins in 2654 species: Archae - 273; Bacteria - 40324; Metazoa - 30; Fungi - 580; Plants - 1499; Viruses - 4; Ot…
AT3G48100	252374_at	6.69688e-12	2.40706e-12	1.03659e-08	2.11485e-08	0.000464374	1.28616e-11	0.00624899	5.77373e-08	206.353	7.56371	Arabidopsis thaliana	Exemplar	response reactor 2 (ATRR2) ; supported by cDNA: gi_3273197_dbj_AB010916.1_AB010916	---	response regulator 2 (ATRR2)	---	AGI:At3g48100	---	---	156 // two-component response regulator activity // extended:inferred from electronic annotation; response_reg; 2.7e-16	response_reg // Response regulator receiver domain;2.7e-16	IPB001867 // Transcriptional regulatory protein, C terminal;1.7e-07	---	---	EC:3.1.1.61 // Y415_BORBU PROBABLE PROTEIN-GLUTAMATE METHYLESTERASE BB0415 (EC 3.1.1.61).;1.01e-17	15228338 // response reactor 2 (ATRR2) protein id: At3g48100.1, supported by cDNA: gi_18252910, supported by cDNA: gi_3273197, supported by cDNA: gi_3323580, supported by cDNA: gi_3953598 [Arabidopsis thaliana];4e-97 /// 11358763 // response regulator 5 [imported] - Arabidopsis thaliana;2e-96	protein_coding	response regulator 5	Encodes a transcription repressor that mediates a negative feedback loop in cytokinin signalling. ARR5 expression is upregulated by Class I KNOX genes. Arr5 protein is stabilized by cytokinin in a two-component phosphorelay.	response regulator 5 (RR5); CONTAINS InterPro DOMAIN/s: CheY-like (InterPro:IPR011006), Signal transduction response regulator, receiver domain (InterPro:IPR001789); BEST Arabidopsis thaliana protein match is: response regulator 6 (TAIR:AT5G62920.1); Has 45766 Blast hits to 45301 proteins in 2636 species: Archae - 240; Bacteria - 40380; Metazoa - 18; Fungi - 471; Plants - 1420; Viruses - 2; Other…
AT2G40670	266078_at	4.51963e-09	3.5219e-11	4.14308e-09	3.26514e-07	5.16194e-06	7.05515e-12	0.144206	7.34907e-07	189.617	5.36549	Arabidopsis thaliana	Exemplar	putative two-component response regulator protein ; supported by cDNA: gi_11870067_gb_AF305721.1_AF305721	---	response regulator 16	---	AGI:At2g40670	---	---	156 // two-component response regulator activity // extended:inferred from electronic annotation; response_reg; 5.1e-09	response_reg // Response regulator receiver domain;5.1e-09	IPB001867 // Transcriptional regulatory protein, C terminal;0.00057	---	---	---	18410485 // response regulator-like protein protein id: At3g56380.1, supported by cDNA: gi_11870070 [Arabidopsis thaliana];2e-63 /// 15226732 // putative two-component response regulator protein protein id: At2g40670.1, supported by cDNA: gi_11870067 [Arabidopsis thaliana];6e-91	protein_coding	response regulator 16	response regulator 16	response regulator 16 (RR16); CONTAINS InterPro DOMAIN/s: CheY-like (InterPro:IPR011006), Signal transduction response regulator, receiver domain (InterPro:IPR001789); BEST Arabidopsis thaliana protein match is: response regulator 17 (TAIR:AT3G56380.1); Has 23045 Blast hits to 22821 proteins in 2006 species: Archae - 145; Bacteria - 19499; Metazoa - 15; Fungi - 406; Plants - 1290; Viruses - 6; Ot…
AT1G19050	259466_at	6.80419e-12	3.89973e-10	3.32107e-07	5.16222e-07	0.00891078	1.96282e-06	0.233	4.8032e-10	169.586	4.96405	Arabidopsis thaliana	Exemplar	'response regulator 5, putative similar to response regulator 5 GI:3953599 from [Arabidopsis thaliana]; supported by cDNA: gi_3953602_dbj_AB008490.1_AB008490 '	---	response regulator 7	---	AGI:At1g19050	---	---	156 // two-component response regulator activity // extended:inferred from electronic annotation; response_reg; 4.6e-20	response_reg // Response regulator receiver domain;4.6e-20	IPB001867 // Transcriptional regulatory protein, C terminal;2.9e-07	---	---	EC:3.1.1.61 // Y415_BORBU PROBABLE PROTEIN-GLUTAMATE METHYLESTERASE BB0415 (EC 3.1.1.61).;4.41e-17	15221927 // response regulator 5, putative protein id: At1g19050.1, supported by cDNA: gi_3953602 [Arabidopsis thaliana];e-110 /// 15222035 // response regulator 7, putative protein id: At1g74890.1, supported by cDNA: gi_11870064 [Arabidopsis thaliana];2e-66	protein_coding	response regulator 7	Encodes a member of the Arabidopsis response regulator (ARR) family, most closely related to ARR15. A two-component response regulator protein containing a phosphate accepting domain in the receiver domain but lacking a DNA binding domain in the output domain. Involved in response to cytokinin and meristem stem cell maintenance. Arr7 protein is stabilized by cytokinin.	response regulator 7 (ARR7); CONTAINS InterPro DOMAIN/s: CheY-like (InterPro:IPR011006), Signal transduction response regulator, receiver domain (InterPro:IPR001789); BEST Arabidopsis thaliana protein match is: response regulator 15 (TAIR:AT1G74890.1); Has 53636 Blast hits to 53063 proteins in 2702 species: Archae - 285; Bacteria - 47261; Metazoa - 20; Fungi - 584; Plants - 1468; Viruses - 6; Oth…
AT1G10470	263236_at	8.79892e-08	1.7982e-09	1.91918e-06	3.2482e-09	0.0416036	1.71434e-10	0.181962	2.08635e-08	164.679	2.7394	Arabidopsis thaliana	Exemplar	'putative response regulator 3 similar to ESTs gb|T43772, emb|Z34204, gb|AA067391, and emb|Z34620, implicated in His-to-Asp phosphotransfer signaling in Arabidopsis; supported by cDNA: gi_3273195_dbj_AB010915.1_AB010915 '	---	response regulator1 (ATRR1)	---	AGI:At1g10470	---	---	156 // two-component response regulator activity // extended:inferred from electronic annotation; response_reg; 1.9e-19	response_reg // Response regulator receiver domain;1.9e-19	IPB000673 // CheB methylesterase;0.0094	d1dcfa_ // c.23.1.2 // Receiver domain of the ethylene receptor;1.57e-24	---	EC:3.1.1.61 // Y415_BORBU PROBABLE PROTEIN-GLUTAMATE METHYLESTERASE BB0415 (EC 3.1.1.61).;2.42e-19	15218550 // putative response regulator 3 protein id: At1g10470.1, supported by cDNA: gi_3273195, supported by cDNA: gi_3323582, supported by cDNA: gi_3953596 [Arabidopsis thaliana];e-142 /// 15218957 // response regulator 3 protein id: At1g59940.1, supported by cDNA: gi_3953594 [Arabidopsis thaliana];2e-86	protein_coding	response regulator 4	Encodes a two-component response regulator. Acts redundantly with ARR3 in the control of circadian period in a cytokinin-independent manner.	response regulator 4 (ARR4); CONTAINS InterPro DOMAIN/s: CheY-like (InterPro:IPR011006), Signal transduction response regulator, receiver domain (InterPro:IPR001789); BEST Arabidopsis thaliana protein match is: response regulator 3 (TAIR:AT1G59940.1); Has 56806 Blast hits to 56102 proteins in 2778 species: Archae - 292; Bacteria - 49762; Metazoa - 41; Fungi - 583; Plants - 1526; Viruses - 7; Othe…
AT5G62920	247406_at	5.30244e-13	1.6453e-09	9.20152e-06	1.84951e-05	0.00775535	2.98041e-08	0.124271	1.93932e-08	163.048	5.33871	Arabidopsis thaliana	Exemplar	response regulator 6 (ARR6) ; supported by cDNA: gi_3953600_dbj_AB008489.1_AB008489	---	response regulator 6 (ARR6)	---	AGI:At5g62920	---	---	156 // two-component response regulator activity // extended:inferred from electronic annotation; response_reg; 8.9e-17	response_reg // Response regulator receiver domain;8.9e-17	IPB000673 // CheB methylesterase;0.001	---	---	EC:3.1.1.61 // Y415_BORBU PROBABLE PROTEIN-GLUTAMATE METHYLESTERASE BB0415 (EC 3.1.1.61).;1.77e-17	15242000 // response regulator 6 (ARR6) protein id: At5g62920.1, supported by cDNA: gi_3953600 [Arabidopsis thaliana];3e-99 /// 11358765 // response regulator 6 [imported] - Arabidopsis thaliana;7e-82	protein_coding	response regulator 6	Encodes a Type-A response regulator that is responsive to cytokinin treatment. Its C-ter domain is very short in comparison to other Arabidopsis ARRs (17 total). Arr6 protein is stabilized by cytokinin.	response regulator 6 (ARR6); CONTAINS InterPro DOMAIN/s: CheY-like (InterPro:IPR011006), Signal transduction response regulator, receiver domain (InterPro:IPR001789); BEST Arabidopsis thaliana protein match is: response regulator 5 (TAIR:AT3G48100.1); Has 47436 Blast hits to 46969 proteins in 2667 species: Archae - 260; Bacteria - 41739; Metazoa - 17; Fungi - 503; Plants - 1416; Viruses - 4; Othe…
AT1G16530	262704_at	9.47713e-10	5.94827e-07	1.79416e-08	1.57915e-07	0.000598487	5.63884e-06	0.256099	3.17762e-09	157.32	3.1148	Arabidopsis thaliana	Exemplar	hypothetical protein predicted by genscan	---	lateral organ boundaries (LOB) domain family	---	AGI:At1g16530	---	---	---	DUF260 // Protein of unknown function DUF260;2.4e-62	---	---	---	---	15221679 // hypothetical protein protein id: At1g31320.1 [Arabidopsis thaliana];3e-42 /// 15219279 // hypothetical protein protein id: At1g16530.1 [Arabidopsis thaliana];2e-94	protein_coding	ASYMMETRIC LEAVES 2-like 9		ASYMMETRIC LEAVES 2-like 9 (ASL9); CONTAINS InterPro DOMAIN/s: Lateral organ boundaries, LOB (InterPro:IPR004883); BEST Arabidopsis thaliana protein match is: Lateral organ boundaries (LOB) domain family protein (TAIR:AT2G30130.1); Has 986 Blast hits to 981 proteins in 24 species: Archae - 0; Bacteria - 0; Metazoa - 0; Fungi - 0; Plants - 986; Viruses - 0; Other Eukaryotes - 0 (source: NCBI BLink…
AT5G05860	250753_at	2.26238e-12	9.52189e-09	0.000127792	0.000369741	0.0137786	3.23627e-14	0.319708	0.00015217	154.988	2.47384	Arabidopsis thaliana	Exemplar	glucuronosyl transferase-like protein ; supported by cDNA: gi_15010631_gb_AY045617.1_	---	glucuronosyl transferase-related protein	---	AGI:At5g05860	---	---	16758 // transferase activity, transferring hexosyl groups // extended:Unknown; UDPGT; 7.9e-08	UDPGT // UDP-glucoronosyl and UDP-glucosyl transferas;7.9e-08	IPB002213 // UDP-glucoronosyl and UDP-glucosyl transferase;1.1e-29	---	---	EC:2.4.1.91 // UFOG_VITVI FLAVONOL 3-O-GLUCOSYLTRANSFERASE (EC 2.4.1.91) (UDP-GLUCOSE FLAVONOID 3-O-GLUCOSYLTRANSFERASE) (FRAGMENT).;1.33e-42	15239259 // glucuronosyl transferase-like protein protein id: At5g05880.1 [Arabidopsis thaliana];e-165 /// 15239257 // glucuronosyl transferase-like protein protein id: At5g05860.1, supported by cDNA: gi_15010631 [Arabidopsis thaliana];0.0	protein_coding	UDP-glucosyl transferase 76C2		UDP-glucosyl transferase 76C2 (UGT76C2); FUNCTIONS IN: in 6 functions; INVOLVED IN: metabolic process; EXPRESSED IN: 17 plant structures; EXPRESSED DURING: 12 growth stages; CONTAINS InterPro DOMAIN/s: UDP-glucuronosyl/UDP-glucosyltransferase (InterPro:IPR002213); BEST Arabidopsis thaliana protein match is: UDP-Glycosyltransferase superfamily protein (TAIR:AT5G05880.1); Has 1807 Blast hits to 180…
AT3G57040	251665_at	2.10849e-11	2.04521e-09	5.05906e-07	3.3886e-06	0.0970886	2.9916e-07	0.0547224	0.000198923	144.94	2.55309	Arabidopsis thaliana	Exemplar	responce reactor 4 ; supported by cDNA: gi_3273201_dbj_AB010918.1_AB010918	---	responce reactor 4	---	AGI:At3g57040	---	---	156 // two-component response regulator activity // extended:inferred from electronic annotation; response_reg; 2.7e-17	response_reg // Response regulator receiver domain;2.7e-17	IPB001867 // Transcriptional regulatory protein, C terminal;3.3e-05	---	---	---	15230202 // responce reactor 4 protein id: At3g57040.1, supported by cDNA: gi_19699060, supported by cDNA: gi_3273201 [Arabidopsis thaliana];e-127 /// 15227325 // putative two-component response regulator 3 protein protein id: At2g41310.1, supported by cDNA: gi_18491268 [Arabidopsis thaliana];2e-79	protein_coding	response regulator 9	response regulator ARR9, A two-component response regulator-like protein with a receiver domain with a conserved aspartate residue and a possible phosphorylation site and at the N-terminal half. Appears to interact with histidine kinase like genes ATHP3 and ATHP2	response regulator 9 (ARR9); CONTAINS InterPro DOMAIN/s: CheY-like (InterPro:IPR011006), Signal transduction response regulator, receiver domain (InterPro:IPR001789); BEST Arabidopsis thaliana protein match is: response regulator 3 (TAIR:AT2G41310.1); Has 31916 Blast hits to 31617 proteins in 2439 species: Archae - 203; Bacteria - 27463; Metazoa - 9; Fungi - 302; Plants - 1334; Viruses - 4; Other…
AT5G19260	249920_at	1.93264e-12	5.08258e-08	0.00814085	0.341292	0.00241645	2.76759e-09	0.322457	1.42189e-08	136.456	2.71897	Arabidopsis thaliana	Exemplar	putative protein various predicted proteins	---	expressed protein	---	AGI:At5g19260	---	---	---	---	IPB001580 // Calreticulin family;0.0061	---	---	---	15230610 // hypothetical protein protein id: At3g06020.1 [Arabidopsis thaliana];6e-65 /// 15239688 // ;e-163	protein_coding	Protein of unknown function (DUF3049)		Protein of unknown function (DUF3049); CONTAINS InterPro DOMAIN/s: Protein of unknown function DUF3049 (InterPro:IPR021410); BEST Arabidopsis thaliana protein match is: Protein of unknown function (DUF3049) (TAIR:AT3G06020.1); Has 1807 Blast hits to 1807 proteins in 277 species: Archae - 0; Bacteria - 0; Metazoa - 736; Fungi - 347; Plants - 385; Viruses - 0; Other Eukaryotes - 339 (source: NCBI B…
AT4G29740	253696_at	2.40623e-09	8.00534e-09	3.87807e-06	0.000111753	0.0086489	1.10607e-07	0.967023	7.92251e-06	133.586	3.47991	Arabidopsis thaliana	Exemplar	'cytokinin oxidase - like protein cytokinin oxidase, Zea mays, gb:Y18377; supported by cDNA: gi_15450760_gb_AY054460.1_ '	---	cytokinin oxidase family	---	AGI:At4g29740	---	---	8246 // electron transfer flavoprotein // extended:inferred from electronic annotation; FAD_binding_4; 2.5e-35	FAD_binding_4 // FAD binding domain;2.5e-35	IPB001575 // Oxygen oxidoreductases covalent FAD-binding site;0.0017	d1i19a2 // d.145.1.1 // Cholesterol oxidase;3.46e-16	numtm:0;Nin-prob:0.92947;Type:SIGNAL;Span:	EC:1.1.3.37 // ALO_YEAST D-ARABINONO-1,4-LACTONE OXIDASE (EC 1.1.3.37) (ALO).;2.18e-113 /// EC:1.1.2.4 // DLD1_YEAST D-LACTATE DEHYDROGENASE [CYTOCHROME], MITOCHONDRIAL PRECURSOR (EC 1.1.2.4) (D-LACTATE FERRICYTOCHROME C OXIDOREDUCTASE) (D-LCR).;5.09e-91 /// EC:2.5.1.26 // ADAS_HUMAN ALKYLDIHYDROXYACETONEPHOSPHATE SYNTHASE PRECURSOR (EC 2.5.1.26) (ALKYL-DHAP SYNTHASE) (ALKYLGLYCERONE-PHOSPHATE SY…	11120512 // cytokinin oxidase [Arabidopsis thaliana];0.0 /// 15233677 // cytokinin oxidase - like protein protein id: At4g29740.1, supported by cDNA: gi_11120511, supported by cDNA: gi_15450760 [Arabidopsis thaliana];0.0	protein_coding	cytokinin oxidase 4	It encodes a protein whose sequence is similar to cytokinin oxidase/dehydrogenase, which catalyzes the degradation of cytokinins.	cytokinin oxidase 4 (CKX4); FUNCTIONS IN: primary amine oxidase activity, cytokinin dehydrogenase activity; INVOLVED IN: cytokinin catabolic process; LOCATED IN: endomembrane system; EXPRESSED IN: 15 plant structures; EXPRESSED DURING: 9 growth stages; CONTAINS InterPro DOMAIN/s: Cytokinin dehydrogenase 1, FAD/cytokinin binding domain (InterPro:IPR015345), FAD-binding, type 2 (InterPro:IPR016166)…
AT4G03610	255385_at	1.11916e-08	0.000122123	3.89736e-08	2.92217e-07	5.38775e-06	0.0154421	0.808992	3.45544e-07	131.021	2.92176	Arabidopsis thaliana	Exemplar	putative hydrolase	---	hydrolase -related	---	AGI:At4g03610	---	---	---	---	---	---	---	---	15236346 // putative hydrolase protein id: At4g03610.1 [Arabidopsis thaliana];e-171 /// 15220711 // hypothetical protein protein id: At1g30300.1 [Arabidopsis thaliana];e-107	protein_coding	Metallo-hydrolase/oxidoreductase superfamily protein		Metallo-hydrolase/oxidoreductase superfamily protein; BEST Arabidopsis thaliana protein match is: Metallo-hydrolase/oxidoreductase superfamily protein (TAIR:AT1G30300.1); Has 2341 Blast hits to 2330 proteins in 693 species: Archae - 12; Bacteria - 1231; Metazoa - 0; Fungi - 21; Plants - 106; Viruses - 0; Other Eukaryotes - 971 (source: NCBI BLink).
AT4G23750	254235_at	8.14351e-14	2.00661e-12	0.232094	3.1384e-05	0.0383344	3.72992e-05	0.854825	0.000356135	130.504	2.2219	Arabidopsis thaliana	Exemplar	'putative Ap2 domain protein DNA-binding protein Pti6 - Lycopersicon esculentum,PID:g2213785; supported by cDNA: gi_15982736_gb_AY057475.1_ '	---	AP2 domain transcription factor, putative	---	AGI:At4g23750	---	---	3700 // transcription factor activity // extended:inferred from electronic annotation; AP2-domain; 2.1e-38	AP2-domain // AP2 domain;2.1e-38	PR00367 // Ethylene responsive element binding protein signature;1e-28	d1gcca_ // d.10.1.2 // GCC-box binding domain;6.76e-23	---	---	22655200 // putative Ap2 domain protein [Arabidopsis thaliana];0.0 /// 15236595 // putative Ap2 domain protein protein id: At4g23750.1, supported by cDNA: gi_15982736 [Arabidopsis thaliana];0.0	protein_coding	cytokinin response factor 2	encodes a member of the ERF (ethylene response factor) subfamily B-5 of ERF/AP2 transcription factor family. The protein contains one AP2 domain. There are 7 members in this subfamily. Monopteros target gene.	cytokinin response factor 2 (CRF2); CONTAINS InterPro DOMAIN/s: DNA-binding, integrase-type (InterPro:IPR016177), Pathogenesis-related transcriptional factor/ERF, DNA-binding (InterPro:IPR001471); BEST Arabidopsis thaliana protein match is: cytokinin response factor 1 (TAIR:AT4G11140.1); Has 5899 Blast hits to 5717 proteins in 251 species: Archae - 0; Bacteria - 0; Metazoa - 6; Fungi - 2; Plants …
AT2G01830	263599_at	2.67249e-09	1.0142e-07	3.01952e-06	2.31228e-05	0.0196409	1.8267e-07	0.623868	5.85709e-05	128.244	2.35449	Arabidopsis thaliana	Exemplar	putative histidine kinase ; supported by cDNA: gi_13359154_dbj_AB049934.1_AB049934	---	histidine kinase -related	---	AGI:At2g01830	---	---	---	response_reg // Response regulator receiver domain;1.2e-22 /// HATPase_c // Histidine kinase-, DNA gyrase B-, and HS;4.2e-33 /// CHASE // CHASE domain;2.4e-103 /// HisKA // His Kinase A (phosphoacceptor) domain;4.3e-24	IPB000673 // CheB methylesterase;0.001	d2chf__ // c.23.1.1 // CheY protein;1.99e-29 /// d1bxda_ // d.122.1.3 // Histidine kinase domain of the osmosensor EnvZ;4.41e-30	numtm:1;Nin-prob:0.07398;Type:;Span:TM from 397 to 419: Eval:0.74164	EC:2.7.1.99 // PDK4_HUMAN [PYRUVATE DEHYDROGENASE [LIPOAMIDE]] KINASE ISOZYME 4, MITOCHONDRIAL PRECURSOR (EC 2.7.1.99) (PYRUVATE DEHYDROGENASE KINASE ISOFORM 4).;2.97e-74	13537200 // histidine kinase [Arabidopsis thaliana];0.0 /// 18379305 // putative histidine kinase protein id: At2g01830.1, supported by cDNA: gi_13359154 [Arabidopsis thaliana];0.0	protein_coding	CHASE domain containing histidine kinase protein	Histidine kinase: cytokinin-binding receptor that transduces cytokinin signals across the plasma membrane	WOODEN LEG (WOL); FUNCTIONS IN: osmosensor activity, cytokine binding, cytokinin receptor activity, protein histidine kinase activity, phosphoprotein phosphatase activity; INVOLVED IN: in 7 processes; LOCATED IN: membrane; EXPRESSED IN: 30 plant structures; EXPRESSED DURING: 13 growth stages; CONTAINS InterPro DOMAIN/s: Signal transduction histidine kinase, homodimeric (InterPro:IPR009082), CHASE…
AT2G17820	264790_at	0.925973	1.08575e-09	3.46439e-09	4.0899e-09	0.0763701	5.4247e-07	0.656795	3.48659e-05	125.799	2.97637	Arabidopsis thaliana	Exemplar	putative histidine kinase histidine kinase domain from residues 490 to 1190; supported by cDNA: gi_3399696_dbj_AB010914.1_AB010914	---	histidine kinase 1	---	AGI:At2g17820	---	---	155 // two-component sensor molecule activity // extended:inferred from electronic annotation; HisKA; 8e-21	HATPase_c // Histidine kinase-, DNA gyrase B-, and HS;3.2e-30 /// response_reg // Response regulator receiver domain;1.2e-23 /// HisKA // His Kinase A (phosphoacceptor) domain;8e-21	IPB000673 // CheB methylesterase;0.0022	d1ntr__ // c.23.1.1 // NTRC receiver domain;1.51e-26 /// d1bxda_ // d.122.1.3 // Histidine kinase domain of the osmosensor EnvZ;4.91e-28	numtm:2;Nin-prob:0.11329;Type:;Span:TM from 77 to 99: Eval:0.84607/TM from 447 to 469: Eval:0.85338	EC:2.7.1.99 // PDK4_HUMAN [PYRUVATE DEHYDROGENASE [LIPOAMIDE]] KINASE ISOZYME 4, MITOCHONDRIAL PRECURSOR (EC 2.7.1.99) (PYRUVATE DEHYDROGENASE KINASE ISOFORM 4).;2.56e-71	25456590 // sensory transduction histidine kinase 1 [validated] - Arabidopsis thaliana;0.0 /// 18398532 // ;0.0	protein_coding	histidine kinase 1	Encodes a member of the histidine kinase family.	histidine kinase 1 (HK1); FUNCTIONS IN: osmosensor activity, protein histidine kinase activity, histidine phosphotransfer kinase activity; INVOLVED IN: response to water deprivation, seed maturation, response to osmotic stress; LOCATED IN: membrane; EXPRESSED IN: 19 plant structures; EXPRESSED DURING: 12 growth stages; CONTAINS InterPro DOMAIN/s: Signal transduction histidine kinase, homodimeric …
AT1G75440	261110_at	4.12147e-11	0.000597046	1.31131e-05	3.36405e-05	0.267113	3.51495e-09	0.360917	8.67135e-06	124.56	2.35435	Arabidopsis thaliana	Exemplar	'E2, ubiquitin-conjugating enzyme 16 (UBC16) identical to gi:2801444, GB:AAC39325 from [Arabidopsis thaliana] (Plant Mol. Biol. 23 (2), 387-396 (1993))'	---	ubiquitin-conjugating enzyme 16 (UBC16)	UBC16	AGI:At1g75440	---	---	4840 // ubiquitin conjugating enzyme activity // extended:inferred from electronic annotation; UQ_con; 6e-48	UQ_con // Ubiquitin-conjugating enzyme;6e-48	IPB000608 // Ubiquitin-conjugating enzymes;4.8e-11	d1qcqa_ // d.20.1.1 // Ubiquitin conjugating enzyme, UBC;2.51e-36	---	EC:6.3.2.19 // UBCJ_HUMAN UBIQUITIN-CONJUGATING ENZYME E2 G2 (EC 6.3.2.19) (UBIQUITIN-PROTEIN LIGASE) (UBIQUITIN CARRIER PROTEIN).;6.38e-39	2801444 // ubiquitin-conjugating enzyme 16 [Arabidopsis thaliana];4e-85 /// 18410856 // E2, ubiquitin-conjugating enzyme 16 (UBC16) protein id: At1g75440.1, supported by cDNA: gi_17529345, supported by cDNA: gi_20259616 [Arabidopsis thaliana];7e-94	protein_coding	ubiquitin-conjugating enzyme 16		ubiquitin-conjugating enzyme 16 (UBC16); FUNCTIONS IN: ubiquitin-protein ligase activity, small conjugating protein ligase activity; INVOLVED IN: ubiquitin-dependent protein catabolic process; EXPRESSED IN: 21 plant structures; EXPRESSED DURING: 13 growth stages; CONTAINS InterPro DOMAIN/s: Ubiquitin-conjugating enzyme/RWD-like (InterPro:IPR016135), Ubiquitin-conjugating enzyme, E2 (InterPro:IPR0…
AT2G46310	266606_at	1.55312e-13	6.76193e-10	9.89893e-05	0.115917	0.109471	4.26047e-05	0.0665937	0.00011271	124.157	2.64203	Arabidopsis thaliana	Exemplar	putative AP2 domain transcription factor	---	AP2 domain transcription factor, putative	---	AGI:At2g46310	---	---	3700 // transcription factor activity // extended:inferred from electronic annotation; AP2-domain; 5.9e-32	AP2-domain // AP2 domain;5.9e-32	PR00367 // Ethylene responsive element binding protein signature;2e-29	d1gcca_ // d.10.1.2 // GCC-box binding domain;3.09e-21	---	---	15233169 // putative protein protein id: At3g61630.1, supported by cDNA: 100688. [Arabidopsis thaliana];1e-74 /// 15225959 // putative AP2 domain transcription factor protein id: At2g46310.1, supported by cDNA: gi_18491258 [Arabidopsis thaliana];e-172	protein_coding	cytokinin response factor 5	CRF5 encodes one of the six cytokinin response factors. It is transcriptionally upregulated in response to cytokinin. CRF5 belongs to the AP2/ERF superfamily of the transcriptional factors. CRF proteins rapidly relocalize to the nucleus in response to cytokinin. Analysis of loos-of-function mutants revealed that the CRFs function redundantly to regulate the development of embryos, cotyledons and …	cytokinin response factor 5 (CRF5); CONTAINS InterPro DOMAIN/s: DNA-binding, integrase-type (InterPro:IPR016177), Pathogenesis-related transcriptional factor/ERF, DNA-binding (InterPro:IPR001471); BEST Arabidopsis thaliana protein match is: cytokinin response factor 6 (TAIR:AT3G61630.1); Has 5622 Blast hits to 5574 proteins in 244 species: Archae - 0; Bacteria - 0; Metazoa - 0; Fungi - 0; Plants …
AT1G67110	264470_at	0.498373	1.37807e-12	1.77135e-09	1.40892e-05	1.81807e-06	0.931416	0.523214	3.03806e-06	124.027	6.45081	Arabidopsis thaliana	Exemplar	'cytochrome P450, putative similar to cytochrome P450 (CYP72B) GI:404687 from [Catharanthus roseus]'	---	cytochrome P450, putative	---	AGI:At1g67110	6118 // electron transport // extended:inferred from electronic annotation; p450; 1.2e-78	---	---	p450 // Cytochrome P450;1.2e-78	IPB001128 // none;1.9e-06	d1jpza_ // a.104.1.1 // Cytochrome P450 bm-3;1.23e-116	numtm:0;Nin-prob:0.80426;Type:SIGNAL;Span:	EC:1.14.13.30 // CPF3_HUMAN CYTOCHROME P450 4F3 (EC 1.14.13.30) (CYPIVF3) (LEUKOTRIENE-B4 OMEGA- HYDROXYLASE) (LEUKOTRIENE-B4 20-MONOOXYGENASE) (CYTOCHROME P450- LTB-OMEGA).;1.51e-127 /// EC:1.14.15.3 // CP4Y_HUMAN CYTOCHROME P450 4A11 PRECURSOR (EC 1.14.15.3) (CYPIVA11) (FATTY ACID OMEGA-HYDROXYLASE) (P-450 HK OMEGA) (LAURIC ACID OMEGA-HYDROXYLASE) (CYP4AII) (P450-HL-OMEGA).;1.47e-130 /// EC:1.1…	15240917 // cytochrome p450, putative protein id: At5g38450.1 [Arabidopsis thaliana];0.0 /// 15219831 // cytochrome P450, putative protein id: At1g67110.1 [Arabidopsis thaliana];0.0	protein_coding	cytochrome P450, family 735, subfamily A, polypeptide 2	member of CYP709A	cytochrome P450, family 735, subfamily A, polypeptide 2 (CYP735A2); FUNCTIONS IN: electron carrier activity, monooxygenase activity, iron ion binding, oxygen binding, heme binding; INVOLVED IN: oxidation reduction; LOCATED IN: endomembrane system; EXPRESSED IN: 7 plant structures; EXPRESSED DURING: petal differentiation and expansion stage; CONTAINS InterPro DOMAIN/s: Cytochrome P450 (InterPro:IP…
AT2G41310	266372_at	5.6245e-11	2.7122e-05	8.3908e-06	9.29142e-06	0.00101284	0.0843611	0.0205101	7.33976e-07	122.298	2.7156	Arabidopsis thaliana	Exemplar	'putative two-component response regulator 3 protein identical to GB:AB010917, contains a response regulator receiver domain; supported by cDNA: gi_3273199_dbj_AB010917.1_AB010917 '	---	two-component response regulator 3 protein -related	---	AGI:At2g41310	6355 // regulation of transcription, DNA-dependent // inferred from electronic annotation /// 160 // two-component signal transduction system (phosphorelay) // inferred from electronic annotation	---	156 // two-component response regulator activity // extended:inferred from electronic annotation; response_reg; 1.2e-17	response_reg // Response regulator receiver domain;1.2e-17	IPB001867 // Transcriptional regulatory protein, C terminal;3.3e-05	---	---	EC:3.1.1.61 // Y415_BORBU PROBABLE PROTEIN-GLUTAMATE METHYLESTERASE BB0415 (EC 3.1.1.61).;1.34e-16	15230202 // responce reactor 4 protein id: At3g57040.1, supported by cDNA: gi_19699060, supported by cDNA: gi_3273201 [Arabidopsis thaliana];2e-79 /// 15227325 // putative two-component response regulator 3 protein protein id: At2g41310.1, supported by cDNA: gi_18491268 [Arabidopsis thaliana];e-121	protein_coding	response regulator 3	Encodes an A- type response Regulator that is primarily expressed in the root and is involved in cytokinin-mediated signalling.	response regulator 3 (RR3); CONTAINS InterPro DOMAIN/s: CheY-like (InterPro:IPR011006), Signal transduction response regulator, receiver domain (InterPro:IPR001789); BEST Arabidopsis thaliana protein match is: response regulator 9 (TAIR:AT3G57040.1); Has 36974 Blast hits to 36596 proteins in 2486 species: Archae - 189; Bacteria - 32197; Metazoa - 9; Fungi - 371; Plants - 1334; Viruses - 4; Other …
AT2G25160	264404_at	0.977076	9.55413e-12	4.3138e-06	2.51479e-07	3.53197e-05	0.841726	0.547277	3.7619e-09	120.279	5.16309	Arabidopsis thaliana	Exemplar	putative cytochrome P450	---	cytochrome P450, putative	---	AGI:At2g25160	6118 // electron transport // extended:inferred from electronic annotation; p450; 5.1e-74	---	---	p450 // Cytochrome P450;5.1e-74	IPB001128 // none;0.0026	d1jpza_ // a.104.1.1 // Cytochrome P450 bm-3;2.7e-105	numtm:1;Nin-prob:0.08663;Type:SIGNAL;Span:TM from 308 to 330: Eval:0.70611	EC:1.14.99.10 // CPS1_HUMAN CYTOCHROME P450 XXIB (EC 1.14.99.10) (STEROID 21-HYDROXYLASE) (P450-C21B).;8.16e-110 /// EC:1.1.3.34 // CP80_BERST BERBAMUNINE SYNTHASE (EC 1.1.3.34) (CYTOCHROME P450 80) (CYPLXXX) ((S)-N-METHYLCOCLAURINE OXIDASE [C-O PHENOL-COUPLING]).;1.25e-111 /// EC:1.14.15.4 // CPN2_HUMAN CYTOCHROME P450 11B2 PRECURSOR (EC 1.14.15.4) (CYPXIB2) (P-450ALDO) (ALDOSTERONE SYNTHASE) (A…	7430679 // cytochrome P450 82C1 - soybean;e-139 /// 15224686 // cytochrome p450, putative protein id: At2g25160.1 [Arabidopsis thaliana];0.0	protein_coding	cytochrome P450, family 82, subfamily F, polypeptide 1	member of CYP82F	cytochrome P450, family 82, subfamily F, polypeptide 1 (CYP82F1); FUNCTIONS IN: electron carrier activity, monooxygenase activity, iron ion binding, oxygen binding, heme binding; INVOLVED IN: oxidation reduction; LOCATED IN: endomembrane system; EXPRESSED IN: root; CONTAINS InterPro DOMAIN/s: Cytochrome P450 (InterPro:IPR001128), Cytochrome P450, conserved site (InterPro:IPR017972), Cytochrome P4…
AT2G40230	263382_at	4.43889e-09	1.451e-06	7.57687e-08	0.0370397	0.0333062	0.000390691	0.0199598	2.05109e-07	119.644	2.26213	Arabidopsis thaliana	Exemplar	putative anthranilate N-hydroxycinnamoyl/benzoyltransferase ;supported by full-length cDNA: Ceres:105546.	---	transferase family	---	AGI:At2g40230	---	---	---	Transferase // Transferase family;4e-65	---	---	---	---	15225663 // putative anthranilate N-hydroxycinnamoyl/benzoyltransferase protein id: At2g40230.1, supported by cDNA: 105546. [Arabidopsis thaliana];0.0 /// 15217644 // putative hypersensitivity-related protein protein id: At1g27620.1 [Arabidopsis thaliana];6e-84	protein_coding	HXXXD-type acyl-transferase family protein		HXXXD-type acyl-transferase family protein; FUNCTIONS IN: transferase activity, transferring acyl groups other than amino-acyl groups, transferase activity; INVOLVED IN: biological_process unknown; LOCATED IN: cellular_component unknown; EXPRESSED IN: 16 plant structures; EXPRESSED DURING: 7 growth stages; CONTAINS InterPro DOMAIN/s: Transferase (InterPro:IPR003480); BEST Arabidopsis thaliana pro…
AT1G13420	259388_at	0.734763	3.85056e-12	0.000159737	1.62431e-08	3.25179e-05	0.555741	0.264329	9.03227e-08	117.926	8.19711	Arabidopsis thaliana	Exemplar	'steroid sulfotransferase, putative similar to steroid sulfotransferase 1 GI:3420004 from (Brassica napus);supported by full-length cDNA: Ceres:150484.'	---	sulfotransferase family	---	AGI:At1g13420	---	---	8146 // sulfotransferase activity // extended:inferred from expression pattern; Sulfotransfer; 2.4e-93	Sulfotransfer // Sulfotransferase protein;2.4e-93	IPB000863 // Sulfotransferase;1.1e-90	d1hy3a_ // c.37.1.5 // Estrogen sulfotransferase;1.57e-87	---	EC:2.8.2.4 // SUOE_HUMAN ESTROGEN SULFOTRANSFERASE (EC 2.8.2.4) (SULFOTRANSFERASE, ESTROGEN- PREFERRING) (EST-1).;4.16e-88	15222843 // steroid sulfotransferase, putative protein id: At1g13420.1, supported by cDNA: 150484. [Arabidopsis thaliana];0.0 /// 21553545 // steroid sulfotransferase, putative [Arabidopsis thaliana];0.0	protein_coding	sulfotransferase 4B	Encodes a sulfotransferase. Unlike the related ST4A protein (At2g14920), in vitro experiements show that this enzyme does not act brassinosteroids. ST4B is expressed in the roots and transcript levels rise in response to cytokinin treatment.	sulfotransferase 4B (ST4B); CONTAINS InterPro DOMAIN/s: Sulfotransferase domain (InterPro:IPR000863); BEST Arabidopsis thaliana protein match is: sulfotransferase 4A (TAIR:AT2G14920.1); Has 2771 Blast hits to 2728 proteins in 191 species: Archae - 0; Bacteria - 215; Metazoa - 1679; Fungi - 1; Plants - 543; Viruses - 0; Other Eukaryotes - 333 (source: NCBI BLink).
AT1G75450	261109_at	1.39569e-08	0.000180832	5.47337e-05	1.59268e-05	0.0183328	1.57769e-05	0.196242	1.09534e-07	115.816	2.23538	Arabidopsis thaliana	Exemplar	'cytokinin oxidase, putative similar to GB:CAA77151 from [Zea mays] (Plant J. 17 (6), 615-626 (1999))'	---	cytokinin oxidase family	---	AGI:At1g75450	---	---	8246 // electron transfer flavoprotein // extended:inferred from electronic annotation; FAD_binding_4; 1.9e-38	FAD_binding_4 // FAD binding domain;1.9e-38	---	d1i19a2 // d.145.1.1 // Cholesterol oxidase;6.96e-18	numtm:0;Nin-prob:0.97301;Type:SIGNAL;Span:	EC:2.5.1.26 // ADAS_HUMAN ALKYLDIHYDROXYACETONEPHOSPHATE SYNTHASE PRECURSOR (EC 2.5.1.26) (ALKYL-DHAP SYNTHASE) (ALKYLGLYCERONE-PHOSPHATE SYNTHASE).;2.74e-103 /// EC:1.1.3.8 // GGLO_RAT L-GULONOLACTONE OXIDASE (EC 1.1.3.8) (L-GULONO-GAMMA-LACTONE OXIDASE).;2.47e-88 /// EC:1.1.2.4 // DLD1_YEAST D-LACTATE DEHYDROGENASE [CYTOCHROME], MITOCHONDRIAL PRECURSOR (EC 1.1.2.4) (D-LACTATE FERRICYTOCHROME C …	11120516 // cytokinin oxidase [Arabidopsis thaliana];0.0 /// 22330649 // ;0.0	protein_coding	cytokinin oxidase 5	This gene used to be called AtCKX6. It encodes a protein whose sequence is similar to cytokinin oxidase/dehydrogenase, which catalyzes the degradation of cytokinins.	cytokinin oxidase 5 (CKX5); CONTAINS InterPro DOMAIN/s: Cytokinin dehydrogenase 1, FAD/cytokinin binding domain (InterPro:IPR015345), FAD-binding, type 2 (InterPro:IPR016166), Oxygen oxidoreductase covalent FAD-binding site (InterPro:IPR006093), FAD-linked oxidase-like, C-terminal (InterPro:IPR016164), FAD linked oxidase, N-terminal (InterPro:IPR006094); BEST Arabidopsis thaliana protein match is…
AT3G62930	251195_at	1.10823e-09	9.99601e-11	0.000119978	0.000553085	0.00885779	1.84233e-05	0.503713	0.0664923	114.261	2.19455	Arabidopsis thaliana	Exemplar	'glutaredoxin -like protein glutaredoxin, castor bean, PIR:S54825'	---	glutaredoxin protein family	---	AGI:At3g62930	---	---	9491 // redox-active disulfide bond electron carrier // extended:traceable author statement; glutaredoxin; 8.5e-07	glutaredoxin // Glutaredoxin;8.5e-07	IPB002109 // Glutaredoxin;8.1e-14	d3grx__ // c.47.1.1 // Glutaredoxin (Thioltransferase);6.34e-17	---	---	15229353 // glutaredoxin -like protein protein id: At3g62930.1 [Arabidopsis thaliana];8e-52 /// 15218675 // putative glutaredoxin protein id: At1g03020.1 [Arabidopsis thaliana];1e-40	protein_coding	Thioredoxin superfamily protein		Thioredoxin superfamily protein; FUNCTIONS IN: electron carrier activity, arsenate reductase (glutaredoxin) activity, protein disulfide oxidoreductase activity; INVOLVED IN: cell redox homeostasis; LOCATED IN: cellular_component unknown; EXPRESSED IN: 16 plant structures; EXPRESSED DURING: 9 growth stages; CONTAINS InterPro DOMAIN/s: Glutaredoxin-like, plant II (InterPro:IPR011905), Thioredoxin f…
AT1G58170	246395_at	1.35041e-06	1.91293e-11	7.33541e-07	0.00969633	0.00209506	0.000419402	0.876023	0.000934918	112.543	2.12219	Arabidopsis thaliana	Exemplar	'dirigent protein, putative similar to dirigent protein GI:6694699 from [Thuja plicata]'	---	disease resistance response protein-related/ dirigent protein-related	---	AGI:At1g58170	9621 // response to pathogenic fungi // extended:inferred from electronic annotation; disease_resp; 1.5e-53	---	---	disease_resp // Plant disease resistance response protei;1.5e-53	---	---	---	---	15239779 // disease resistance response protein-related/ dirigent protein-related protein id: At5g49040.1 [Arabidopsis thaliana];6e-53 /// 15217886 // disease resistance response protein-related/ dirigent protein-related protein id: At1g58170.1 [Arabidopsis thaliana];e-102	protein_coding	Disease resistance-responsive (dirigent-like protein) family protein		Disease resistance-responsive (dirigent-like protein) family protein; FUNCTIONS IN: molecular_function unknown; INVOLVED IN: N-terminal protein myristoylation, lignan biosynthetic process, defense response; LOCATED IN: endomembrane system; EXPRESSED IN: 17 plant structures; EXPRESSED DURING: 6 growth stages; CONTAINS InterPro DOMAIN/s: Plant disease resistance response protein (InterPro:IPR004265…
AT4G15230	245540_at	0.00704989	2.36484e-08	2.07498e-05	1.22284e-08	0.000712081	9.47125e-05	0.645672	9.98248e-05	112.067	2.4602	Arabidopsis thaliana	Exemplar	ABC transporter like protein	---	ABC transporter family protein	---	AGI:At4g15230	---	---	4009 // ATP-binding cassette (ABC) transporter activity // extended:Unknown; ABC_tran; 6.9e-25	ABC_tran // ABC transporter;1.1e-44	IPB001140 // ABC transporter transmembrane region;2.5e-11	---	numtm:9;Nin-prob:0.46537;Type:;Span:TM from 469 to 491: Eval:0.92636/TM from 511 to 533: Eval:0.35691/TM from 585 to 607: Eval:0.36748/TM from 612 to 634: Eval:0.83054/TM from 696 to 718: Eval:0.69811/TM from 1108 to 1130: Eval:0.34784/TM from 1151 to 1173: Eval:0.58815/TM from 1217 to 1236: Eval:0.31354/TM from 1295 to 1317: Eval:0.95777	---	22328650 // ;0.0 /// 28144317 // ;0.0	protein_coding	pleiotropic drug resistance 2		pleiotropic drug resistance 2 (PDR2); FUNCTIONS IN: ATPase activity, coupled to transmembrane movement of substances; INVOLVED IN: transport, drug transmembrane transport; LOCATED IN: membrane; EXPRESSED IN: 18 plant structures; EXPRESSED DURING: 10 growth stages; CONTAINS InterPro DOMAIN/s: ATPase, AAA+ type, core (InterPro:IPR003593), ABC transporter-like (InterPro:IPR003439), Plant PDR ABC tra…
AT3G57010	251668_at	4.98324e-05	2.2557e-09	1.6009e-06	4.85591e-06	0.00817964	0.00730149	0.676702	1.38201e-05	110.658	3.2233	Arabidopsis thaliana	Exemplar	putative protein strictosidine synthase (EC 4.3.3.2) - Rauvolfia mannii (fragment); supported by cDNA: gi_13877836_gb_AF370181.1_AF370181	---	strictosidine synthase-related	---	AGI:At3g57010	---	---	16844 // strictosidine synthase activity // extended:Unknown; Str_synth; 7.8e-128	Str_synth // Strictosidine synthase;7.8e-128	---	---	numtm:0;Nin-prob:0.9925;Type:SIGNAL;Span:	EC:3.1.1.2 // PON3_HUMAN SERUM PARAOXONASE/ARYLESTERASE 3 (EC 3.1.1.2) (EC 3.1.8.1) (PON 3) (SERUM ARYLDIAKYLPHOSPHATASE 3) (A-ESTERASE 3) (AROMATIC ESTERASE 3).;1.11e-08 /// EC:3.1.8.1 // PON3_HUMAN SERUM PARAOXONASE/ARYLESTERASE 3 (EC 3.1.1.2) (EC 3.1.8.1) (PON 3) (SERUM ARYLDIAKYLPHOSPHATASE 3) (A-ESTERASE 3) (AROMATIC ESTERASE 3).;1.11e-08 /// EC:4.3.3.2 // STSY_RAUSE STRICTOSIDINE SYNTHASE P…	15230182 // strictosidine synthase-related protein id: At3g57010.1, supported by cDNA: gi_13877836 [Arabidopsis thaliana];0.0 /// 13877837 // unknown protein [Arabidopsis thaliana];0.0	protein_coding	Calcium-dependent phosphotriesterase superfamily protein		Calcium-dependent phosphotriesterase superfamily protein; FUNCTIONS IN: strictosidine synthase activity; INVOLVED IN: alkaloid biosynthetic process, biosynthetic process; LOCATED IN: endoplasmic reticulum; EXPRESSED IN: 9 plant structures; EXPRESSED DURING: 4 anthesis, petal differentiation and expansion stage; CONTAINS InterPro DOMAIN/s: Strictosidine synthase (InterPro:IPR004141), Strictosidine…
AT5G19290	246041_at	7.45385e-13	2.37404e-06	4.0941e-07	0.0105456	0.11839	0.00127957	0.128533	0.00864772	109.26	2.06469	Arabidopsis thaliana	Exemplar	phospholipase - like protein various predicted phospholipase proteins;supported by full-length cDNA: Ceres:253499.	---	esterase/lipase/thioesterase family	---	AGI:At5g19290	---	---	---	---	PR00111 // Alpha/beta hydrolase fold signature;0.00034	---	---	---	15239709 // phospholipase - like protein protein id: At5g19290.1, supported by cDNA: 253499., supported by cDNA: gi_17380667 [Arabidopsis thaliana];0.0 /// 15242179 // lysophospholipase -like protein protein id: At5g14980.1 [Arabidopsis thaliana];e-146	protein_coding	alpha/beta-Hydrolases superfamily protein		alpha/beta-Hydrolases superfamily protein; BEST Arabidopsis thaliana protein match is: alpha/beta-Hydrolases superfamily protein (TAIR:AT5G14980.1); Has 1807 Blast hits to 1807 proteins in 277 species: Archae - 0; Bacteria - 0; Metazoa - 736; Fungi - 347; Plants - 385; Viruses - 0; Other Eukaryotes - 339 (source: NCBI BLink).
AT1G69040	257516_at	2.02364e-10	9.9651e-10	0.218487	0.00531308	0.0342058	1.67324e-07	0.881462	0.0157619	105.405	2.11049	Arabidopsis thaliana	Exemplar	unknown protein	---	uridylyltransferase-related	---	AGI:At1g69040	---	---	16597 // amino acid binding activity // extended:Unknown; ACT; 1.1e-05	ACT // ACT domain;1.2e-32	---	---	---	EC:2.7.7.59 // GLND_VIBFI [PROTEIN-PII] URIDYLYLTRANSFERASE (EC 2.7.7.59) (PII URIDYLYL- TRANSFERASE) (URIDYLYL REMOVING ENZYME) (UTASE).;4.53e-99	15221589 // unknown protein protein id: At1g69040.1 [Arabidopsis thaliana];0.0 /// 25370627 // protein F4N2.2 [imported] - Arabidopsis thaliana;0.0	protein_coding	ACT domain repeat 4	ACT-domain containing protein involved in feedback regulation of amino acid metabolism	ACT domain repeat 4 (ACR4); FUNCTIONS IN: amino acid binding; INVOLVED IN: regulation of cellular amino acid metabolic process, response to cytokinin stimulus; LOCATED IN: cytosol; EXPRESSED IN: 22 plant structures; EXPRESSED DURING: 13 growth stages; CONTAINS InterPro DOMAIN/s: Amino acid-binding ACT (InterPro:IPR002912); BEST Arabidopsis thaliana protein match is: ACT domain repeat 5 (TAIR:AT2G…
AT5G64620	247246_at	3.5938e-14	1.28789e-08	0.794333	0.279943	0.314395	4.03085e-08	0.723246	0.394394	101.084	2.13978	Arabidopsis thaliana	Exemplar	invertase inhibitor homolog (emb|CAA73335.1) ;supported by full-length cDNA: Ceres:25884.	---	invertase/pectin methylesterase inhibitor - related	---	AGI:At5g64620	---	---	---	PMEI // Plant invertase/pectin methylesterase inhibi;6.5e-37	---	---	---	---	27544452 // pectinmethylesterase inhibitor [Actinidia deliciosa];4e-13 /// 15237747 // invertase inhibitor homolog (emb: CAA73335.1) protein id: At5g64620.1, supported by cDNA: 25884. [Arabidopsis thaliana];2e-95	protein_coding	cell wall / vacuolar inhibitor of fructosidase 2	Plant cell wall (CWI) and vacuolar invertases (VI) play important roles in carbohydrate metabolism, stress responses and sugar signaling.	cell wall / vacuolar inhibitor of fructosidase 2 (C/VIF2); FUNCTIONS IN: enzyme inhibitor activity, pectinesterase inhibitor activity, pectinesterase activity; INVOLVED IN: response to karrikin; LOCATED IN: endomembrane system; EXPRESSED IN: 20 plant structures; EXPRESSED DURING: 13 growth stages; CONTAINS InterPro DOMAIN/s: Pectinesterase inhibitor (InterPro:IPR006501); BEST Arabidopsis thaliana…
AT5G47980	248725_at	0.237576	2.7797e-12	0.000257895	0.000214622	0.000303892	0.393176	0.798569	1.55491e-07	100.541	6.98772	Arabidopsis thaliana	Exemplar	acetyl-CoA:benzylalcohol acetyltranferase-like protein	---	acyltransferase family	---	AGI:At5g47980	---	---	---	Transferase // Transferase family;2.2e-113	---	---	---	---	15233803 // acyltransferase family protein id: At4g15400.1 [Arabidopsis thaliana];e-131 /// 15238865 // acyltransferase family protein id: At5g47980.1 [Arabidopsis thaliana];0.0	protein_coding	HXXXD-type acyl-transferase family protein		HXXXD-type acyl-transferase family protein; FUNCTIONS IN: transferase activity, transferring acyl groups other than amino-acyl groups, transferase activity, acyltransferase activity; LOCATED IN: cellular_component unknown; EXPRESSED IN: root; CONTAINS InterPro DOMAIN/s: Transferase (InterPro:IPR003480); BEST Arabidopsis thaliana protein match is: HXXXD-type acyl-transferase family protein (TAIR:A…
AT5G04770	250860_at	1.63798e-09	0.000553095	7.45153e-06	0.000203245	0.00204229	0.000262796	0.0335265	0.034625	99.8841	2.32354	Arabidopsis thaliana	Exemplar	'amino acid transport - like protein amino acid transport protein AAT1, Arabidopsis thaliana, PIR:S51171; supported by full-length cDNA: Ceres: 158156. '	---	amino acid transport - like protein	---	AGI:At5g04770	6810 // transport // extended:Unknown; aa_permeases; 1.2e-06	---	---	aa_permeases // Amino acid permease;1.2e-06	IPB002027 // Amino acid permease;1.3e-29	---	numtm:15;Nin-prob:0.46435;Type:;Span:TM from 60 to 82: Eval:0.89826/TM from 95 to 117: Eval:0.59710/TM from 127 to 148: Eval:0.48576/TM from 161 to 180: Eval:0.33827/TM from 190 to 209: Eval:0.34799/TM from 216 to 235: Eval:0.92027/TM from 255 to 277: Eval:0.43552/TM from 298 to 320: Eval:0.34878/TM from 340 to 362: Eval:0.98534/TM from 394 to 411: Eval:0.94163/TM from 416 to 438: Eval:0.94640/TM…	---	15228334 // putative amino acid transporter protein id: At3g10600.1 [Arabidopsis thaliana];0.0 /// 15238312 // amino acid transport - like protein protein id: At5g04770.1, supported by cDNA: 158156., supported by cDNA: gi_13430547, supported by cDNA: gi_14532753 [Arabidopsis thaliana];0.0	protein_coding	cationic amino acid transporter 6	Encodes a member of the cationic amino acid transporter (CAT) subfamily of amino acid polyamine choline transporters. Does not mediate efficient uptake of basic amino acids in yeast or Xenopus systems but can transport neutral and acidic amino acid analogs. Expressed in sink tissues. Induced during infestation of roots by the plant parasitic root-knot nematode, Meloidogyne incognita. Localized in…	cationic amino acid transporter 6 (CAT6); CONTAINS InterPro DOMAIN/s: Cationic amino acid transporter (InterPro:IPR015606), Amino acid/polyamine transporter I (InterPro:IPR002293), Amino acid permease domain (InterPro:IPR004841); BEST Arabidopsis thaliana protein match is: cationic amino acid transporter 7 (TAIR:AT3G10600.1); Has 1807 Blast hits to 1807 proteins in 277 species: Archae - 0; Bacter…
AT4G11190	254907_at	0.000114262	4.43523e-11	0.00127069	2.98383e-06	0.00111677	0.710024	0.44203	0.000399374	98.2304	6.2515	Arabidopsis thaliana	Exemplar	'putative disease resistance response protein disease resistance response protein 206-d - Pisum sativum, PID:g508844'	---	disease resistance response protein family/ dirigent protein family	---	AGI:At4g11190	9621 // response to pathogenic fungi // extended:inferred from electronic annotation; disease_resp; 6.1e-88	---	---	disease_resp // Plant disease resistance response protei;6.1e-88	---	---	numtm:0;Nin-prob:0.76396;Type:SIGNAL;Span:	---	15237092 // disease resistance response protein family/ dirigent protein family protein id: At4g11210.1 [Arabidopsis thaliana];6e-82 /// 15237088 // disease resistance response protein family/ dirigent protein family protein id: At4g11190.1 [Arabidopsis thaliana];e-104	protein_coding	Disease resistance-responsive (dirigent-like protein) family protein		Disease resistance-responsive (dirigent-like protein) family protein; FUNCTIONS IN: molecular_function unknown; INVOLVED IN: lignan biosynthetic process, defense response; LOCATED IN: endomembrane system; EXPRESSED IN: 10 plant structures; EXPRESSED DURING: F mature embryo stage, petal differentiation and expansion stage, E expanded cotyledon stage, D bilateral stage; CONTAINS InterPro DOMAIN/s: …
AT5G56970	247956_at	0.0863184	0.0321737	4.05188e-10	1.11479e-08	0.00229083	0.00176623	0.293099	0.000557159	96.6067	2.48806	Arabidopsis thaliana	Exemplar	cytokinin oxidase ; supported by cDNA: gi_11120509_gb_AF303979.1_AF303979	---	cytokinin oxidase family	---	AGI:At5g56970	---	---	8246 // electron transfer flavoprotein // extended:inferred from electronic annotation; FAD_binding_4; 3.4e-40	FAD_binding_4 // FAD binding domain;3.4e-40	IPB001575 // Oxygen oxidoreductases covalent FAD-binding site;0.00014	d1i19a2 // d.145.1.1 // Cholesterol oxidase;4.75e-17	numtm:0;Nin-prob:0.92685;Type:SIGNAL;Span:	EC:2.5.1.26 // ADAS_HUMAN ALKYLDIHYDROXYACETONEPHOSPHATE SYNTHASE PRECURSOR (EC 2.5.1.26) (ALKYL-DHAP SYNTHASE) (ALKYLGLYCERONE-PHOSPHATE SYNTHASE).;1.53e-100 /// EC:1.5.3.6 // HDNO_ARTOX 6-HYDROXY-D-NICOTINE OXIDASE (EC 1.5.3.6) (6-HDNO).;1.29e-89 /// EC:1.1.3.8 // GGLO_RAT L-GULONOLACTONE OXIDASE (EC 1.1.3.8) (L-GULONO-GAMMA-LACTONE OXIDASE).;1.55e-92 /// EC:1.1.2.4 // DLD1_YEAST D-LACTATE DEHY…	11558277 // cytokinin oxidase [Dendrobium cv. 'Sonia'];e-141 /// 15241997 // cytokinin oxidase protein id: At5g56970.1, supported by cDNA: gi_11120509 [Arabidopsis thaliana];0.0	protein_coding	cytokinin oxidase 3	It encodes a protein whose sequence is similar to cytokinin oxidase/dehydrogenase, which catalyzes the degradation of cytokinins.	cytokinin oxidase 3 (CKX3); FUNCTIONS IN: primary amine oxidase activity, cytokinin dehydrogenase activity; INVOLVED IN: cytokinin catabolic process; LOCATED IN: vacuole; EXPRESSED IN: 14 plant structures; EXPRESSED DURING: 6 growth stages; CONTAINS InterPro DOMAIN/s: Cytokinin dehydrogenase 1, FAD/cytokinin binding domain (InterPro:IPR015345), FAD-binding, type 2 (InterPro:IPR016166), Oxygen oxi…
AT2G39220	267012_at	0.733875	1.53894e-06	0.000501011	4.31093e-08	0.0386321	7.74463e-05	0.0217013	2.38102e-05	94.421	2.11002	Arabidopsis thaliana	Exemplar	similar to latex allergen from Hevea brasiliensis	---	patatin family	---	AGI:At2g39220	---	---	3824 // enzyme activity // extended:inferred from electronic annotation; Patatin; 3.3e-57	Patatin // Patatin-like phospholipase;3.3e-57	IPB002641 // Patatin;2e-23	---	---	---	15233136 // patatin-related protein id: At3g54950.1 [Arabidopsis thaliana];0.0 /// 15225054 // patatin family protein id: At2g39220.1, supported by cDNA: gi_17065143 [Arabidopsis thaliana];0.0	protein_coding	PATATIN-like protein 6		PATATIN-like protein 6 (PLP6); FUNCTIONS IN: nutrient reservoir activity; INVOLVED IN: metabolic process, lipid metabolic process; EXPRESSED IN: 22 plant structures; EXPRESSED DURING: 13 growth stages; CONTAINS InterPro DOMAIN/s: Acyl transferase/acyl hydrolase/lysophospholipase (InterPro:IPR016035), Patatin (InterPro:IPR002641); BEST Arabidopsis thaliana protein match is: patatin-like protein 6 …
AT3G50300	252202_at	0.520962	3.44666e-08	4.25192e-06	7.05903e-07	0.170766	0.0326157	0.970459	1.85136e-07	93.9048	2.42893	Arabidopsis thaliana	Exemplar	'anthranilate N-hydroxycinnamoyl/benzoyltransferase - like protein anthranilate N-hydroxycinnamoyl/benzoyltransferase, Dianthus caryophyllus, PIR:T10719'	---	hydroxycinnamoyl benzoyltransferase-related	---	AGI:At3g50300	---	---	---	Transferase // Transferase family;5.6e-40	---	---	---	---	15229709 // anthranilate N-hydroxycinnamoyl/benzoyltransferase - like protein protein id: At3g50280.1 [Arabidopsis thaliana];e-166 /// 15229713 // anthranilate N-hydroxycinnamoyl/benzoyltransferase - like protein protein id: At3g50300.1 [Arabidopsis thaliana];0.0	protein_coding	HXXXD-type acyl-transferase family protein		HXXXD-type acyl-transferase family protein; FUNCTIONS IN: transferase activity, transferring acyl groups other than amino-acyl groups, transferase activity; INVOLVED IN: biological_process unknown; LOCATED IN: cellular_component unknown; EXPRESSED IN: hypocotyl, root; CONTAINS InterPro DOMAIN/s: Transferase (InterPro:IPR003480); BEST Arabidopsis thaliana protein match is: HXXXD-type acyl-transfer…
AT5G14070	250223_at	0.000203451	0.977195	2.45551e-08	1.68133e-06	0.000303382	0.0345672	0.0966031	1.09144e-05	93.1539	2.49613	Arabidopsis thaliana	Exemplar	glutaredoxin-like protein ;supported by full-length cDNA: Ceres:123496.	---	glutaredoxin protein family	---	AGI:At5g14070	---	---	---	---	IPB002109 // Glutaredoxin;3.4e-09	---	---	---	15241297 // glutaredoxin-like protein protein id: At5g14070.1, supported by cDNA: 123496., supported by cDNA: gi_13605642, supported by cDNA: gi_15777880 [Arabidopsis thaliana];2e-75 /// 21537203 // glutaredoxin-like protein [Arabidopsis thaliana];3e-53	protein_coding	Thioredoxin superfamily protein	Encodes glutaredoxin ROXY2. ROXY2, together with ROXY1 (AT3G02000), controls anther development. roxy1 roxy2 double mutants are sterile and do not produce pollen.	ROXY2; FUNCTIONS IN: electron carrier activity, protein disulfide oxidoreductase activity; INVOLVED IN: negative regulation of transcription, anther development; LOCATED IN: cellular_component unknown; EXPRESSED IN: tapetum, floral meristem, hypocotyl, anther, root; CONTAINS InterPro DOMAIN/s: Glutaredoxin-like, plant II (InterPro:IPR011905), Glutaredoxin (InterPro:IPR002109), Thioredoxin fold (I…
AT1G12740	255934_at	0.0488559	4.33286e-07	3.43401e-05	0.0481675	2.21865e-05	0.919017	0.634505	2.49174e-10	92.8393	2.40659	Arabidopsis thaliana	Exemplar	'cytochrome P450, putative similar to cytochrome P450 GI:4176420 from [Arabidopsis thaliana]'	---	cytochrome P450, putative	---	AGI:At1g12740	6118 // electron transport // extended:inferred from electronic annotation; p450; 1.2e-48	---	---	p450 // Cytochrome P450;1.2e-48	IPB001128 // none;0.0042	d1jpza_ // a.104.1.1 // Cytochrome P450 bm-3;8.23e-98	numtm:0;Nin-prob:0.67872;Type:SIGNAL;Span:	EC:1.14.15.3 // CP4Y_HUMAN CYTOCHROME P450 4A11 PRECURSOR (EC 1.14.15.3) (CYPIVA11) (FATTY ACID OMEGA-HYDROXYLASE) (P-450 HK OMEGA) (LAURIC ACID OMEGA-HYDROXYLASE) (CYP4AII) (P450-HL-OMEGA).;2.63e-109	15222057 // cytochrome P450, putative protein id: At1g12740.1 [Arabidopsis thaliana];0.0 /// 20520627 // putative cytochrome P450 [Oryza sativa (japonica cultivar-group)];e-176	protein_coding	cytochrome P450, family 87, subfamily A, polypeptide 2	encodes a protein with cytochrome P450 domain	cytochrome P450, family 87, subfamily A, polypeptide 2 (CYP87A2); FUNCTIONS IN: electron carrier activity, monooxygenase activity, iron ion binding, oxygen binding, heme binding; INVOLVED IN: oxidation reduction; EXPRESSED IN: root; CONTAINS InterPro DOMAIN/s: Cytochrome P450 (InterPro:IPR001128), Cytochrome P450, conserved site (InterPro:IPR017972), Cytochrome P450, E-class, group I (InterPro:IP…
AT4G15680	245392_at	8.79112e-05	1.77335e-08	8.03967e-08	0.106198	0.010613	0.000132556	0.220173	0.0355392	92.4629	2.15077	Arabidopsis thaliana	Exemplar	glutaredoxin ;supported by full-length cDNA: Ceres:32219.	---	glutaredoxin protein family	---	AGI:At4g15680	---	---	9491 // redox-active disulfide bond electron carrier // extended:traceable author statement; glutaredoxin; 1.6e-07	glutaredoxin // Glutaredoxin;1.6e-07	IPB002109 // Glutaredoxin;1.4e-15	d3grx__ // c.47.1.1 // Glutaredoxin (Thioltransferase);3.71e-20	---	---	15234675 // glutaredoxin protein id: At4g15680.1, supported by cDNA: 32219. [Arabidopsis thaliana];1e-52 /// 15234673 // glutaredoxin protein id: At4g15670.1 [Arabidopsis thaliana];3e-50	protein_coding	Thioredoxin superfamily protein		Thioredoxin superfamily protein; FUNCTIONS IN: electron carrier activity, arsenate reductase (glutaredoxin) activity, protein disulfide oxidoreductase activity; INVOLVED IN: cell redox homeostasis; LOCATED IN: endomembrane system; EXPRESSED IN: 14 plant structures; EXPRESSED DURING: 8 growth stages; CONTAINS InterPro DOMAIN/s: Glutaredoxin-like, plant II (InterPro:IPR011905), Thioredoxin fold (In…
AT2G46660	266321_at	9.76526e-07	4.96995e-05	6.1524e-07	0.0015988	0.00380137	0.0656103	0.0635142	0.000476849	91.1635	2.089	Arabidopsis thaliana	Exemplar	putative cytochrome P450	---	cytochrome P450, putative	---	AGI:At2g46660	6118 // electron transport // extended:inferred from electronic annotation; p450; 5.1e-70	---	---	p450 // Cytochrome P450;5.1e-70	IPB001128 // none;0.0018	d1dt6a_ // a.104.1.1 // Mammalian cytochrome p450 2c5;1.41e-111	numtm:0;Nin-prob:0.98863;Type:SIGNAL;Span:	EC:1.1.3.34 // CP80_BERST BERBAMUNINE SYNTHASE (EC 1.1.3.34) (CYTOCHROME P450 80) (CYPLXXX) ((S)-N-METHYLCOCLAURINE OXIDASE [C-O PHENOL-COUPLING]).;2.63e-117 /// EC:1.14.15.3 // CP4Y_HUMAN CYTOCHROME P450 4A11 PRECURSOR (EC 1.14.15.3) (CYPIVA11) (FATTY ACID OMEGA-HYDROXYLASE) (P-450 HK OMEGA) (LAURIC ACID OMEGA-HYDROXYLASE) (CYP4AII) (P450-HL-OMEGA).;1.55e-118 /// EC:1.14.99.9 // CPT7_HUMAN CYTOC…	15226422 // putative cytochrome P450 protein id: At2g46660.1 [Arabidopsis thaliana];0.0 /// 15228624 // cytochrome p450 (CYP78A9) protein id: At3g61880.1, supported by cDNA: 29661., supported by cDNA: gi_17065343, supported by cDNA: gi_6633988 [Arabidopsis thaliana];0.0	protein_coding	cytochrome P450, family 78, subfamily A, polypeptide 6	member of CYP78A	cytochrome P450, family 78, subfamily A, polypeptide 6 (CYP78A6); FUNCTIONS IN: electron carrier activity, monooxygenase activity, iron ion binding, oxygen binding, heme binding; INVOLVED IN: oxidation reduction; LOCATED IN: endomembrane system; EXPRESSED IN: 13 plant structures; EXPRESSED DURING: C globular stage, 4 leaf senescence stage, petal differentiation and expansion stage; CONTAINS Inter…
AT2G21650	263549_at	4.42111e-14	1.04814e-05	0.00202215	0.17575	0.144099	0.155295	0.00100688	0.212141	90.0373	3.07303	Arabidopsis thaliana	Exemplar	unknown protein	---	myb family transcription factor	---	AGI:At2g21650	---	---	---	---	IPB001005 // Myb DNA binding domain;0.0014	---	---	---	15226604 // myb family transcription factor protein id: At2g21650.1 [Arabidopsis thaliana];7e-54 /// 15234999 // myb family transcription factor protein id: At4g39250.1 [Arabidopsis thaliana];1e-33	protein_coding	Homeodomain-like superfamily protein	RSM1 is a member of a small sub-family of single MYB transcription factors. Analysis of overexpressin lines indicate its involvement during early morphogenesis.	MATERNAL EFFECT EMBRYO ARREST 3 (MEE3); CONTAINS InterPro DOMAIN/s: SANT, DNA-binding (InterPro:IPR001005), Molecular chaperone, heat shock protein, Hsp40, DnaJ (InterPro:IPR015609), Homeodomain-like (InterPro:IPR009057), MYB-like (InterPro:IPR017877); BEST Arabidopsis thaliana protein match is: RAD-like 1 (TAIR:AT4G39250.1); Has 548 Blast hits to 547 proteins in 63 species: Archae - 0; Bacteria …
AT1G59940	262915_at	0.197098	6.78185e-06	0.00052736	3.8805e-06	9.04411e-05	0.222355	0.989716	2.79338e-08	89.0872	2.71693	Arabidopsis thaliana	Exemplar	response regulator 3 identical to response regulator 3 GI:3953595 from [Arabidopsis thaliana]; supported by cDNA: gi_3953594_dbj_AB008486.1_AB008486	---	response regulator 3	---	AGI:At1g59940	---	---	156 // two-component response regulator activity // extended:inferred from electronic annotation; response_reg; 1.3e-22	response_reg // Response regulator receiver domain;1.3e-22	IPB001867 // Transcriptional regulatory protein, C terminal;5.1e-08	d1a04a2 // c.23.1.1 // Nitrate/nitrite response regulator (NARL), receiver domain;1.23e-21	---	EC:3.1.1.61 // Y415_BORBU PROBABLE PROTEIN-GLUTAMATE METHYLESTERASE BB0415 (EC 3.1.1.61).;5.4e-20	15218957 // response regulator 3 protein id: At1g59940.1, supported by cDNA: gi_3953594 [Arabidopsis thaliana];e-126 /// 15218550 // putative response regulator 3 protein id: At1g10470.1, supported by cDNA: gi_3273195, supported by cDNA: gi_3323582, supported by cDNA: gi_3953596 [Arabidopsis thaliana];1e-86	protein_coding	response regulator 3	Type A response regulator highly similar to bacterial two-component response regulators. Rapidly induced by cytokinin. Involved in red-light signaling. Acts redundantly with ARR3 in the control of circadian period in a cytokinin-independent manner.	response regulator 3 (ARR3); CONTAINS InterPro DOMAIN/s: CheY-like (InterPro:IPR011006), Signal transduction response regulator, receiver domain (InterPro:IPR001789); BEST Arabidopsis thaliana protein match is: response regulator 4 (TAIR:AT1G10470.1); Has 60077 Blast hits to 59393 proteins in 2784 species: Archae - 301; Bacteria - 52871; Metazoa - 21; Fungi - 539; Plants - 1521; Viruses - 7; Othe…
AT4G16000	245353_at	4.08636e-06	0.00496114	0.000677169	6.50029e-09	0.000691624	0.00558703	0.165169	0.0464775	88.2877	2.98831	Arabidopsis thaliana	Exemplar	hypothetical protein ;supported by full-length cDNA: Ceres:9209.	---	expressed protein	---	AGI:At4g16000	---	---	---	---	---	---	---	---	18414566 // ;2e-47 /// 7485022 // hypothetical protein - Arabidopsis thaliana;2e-46	protein_coding			unknown protein; BEST Arabidopsis thaliana protein match is: unknown protein (TAIR:AT4G15990.1); Has 30201 Blast hits to 17322 proteins in 780 species: Archae - 12; Bacteria - 1396; Metazoa - 17338; Fungi - 3422; Plants - 5037; Viruses - 0; Other Eukaryotes - 2996 (source: NCBI BLink).
AT2G38750	266418_at	3.11419e-05	1.01041e-08	0.00741353	0.000194046	0.00099183	0.0404095	0.915848	0.000562107	86.4687	2.60779	Arabidopsis thaliana	Exemplar	putative annexin ;supported by full-length cDNA: Ceres:32721.	---	annexin -related	---	AGI:At2g38750	---	---	5509 // calcium ion binding activity // extended:traceable author statement; annexin; 7.5e-09	annexin // Annexin;1.2e-24	IPB001464 // Annexin family;2.3e-23	d1dk5a_ // a.65.1.1 // Annexin 24(ca32);2.45e-68	---	---	21264397 // Annexin-like protein RJ4;1e-44 /// 15224946 // putative annexin protein id: At2g38750.1, supported by cDNA: 32721., supported by cDNA: gi_14596094, supported by cDNA: gi_20148308, supported by cDNA: gi_6503083 [Arabidopsis thaliana];e-179	protein_coding	annexin 4	Annexins are a family of calcium dependent membrane binding proteins though to be involved in Golgi mediated secretion. This is one of four annexins identified in Arabidopsis.	annexin 4 (ANNAT4); FUNCTIONS IN: calcium-dependent phospholipid binding, calcium ion binding; INVOLVED IN: in 6 processes; LOCATED IN: cell surface; EXPRESSED IN: 21 plant structures; EXPRESSED DURING: 14 growth stages; CONTAINS InterPro DOMAIN/s: Annexin like protein (InterPro:IPR015472), Annexin repeat (InterPro:IPR018502), Annexin (InterPro:IPR001464); BEST Arabidopsis thaliana protein match …
AT1G31320	257467_at	0.000330489	0.000325597	2.75363e-07	0.000108892	0.00521604	0.235485	0.357912	8.17967e-06	86.1557	2.2174	Arabidopsis thaliana	Exemplar	hypothetical protein similar to hypothetical protein GB:AAF24588 GI:6692123 from [Arabidopsis thaliana]	---	lateral organ boundaries (LOB) domain family	---	AGI:At1g31320	---	---	---	DUF260 // Protein of unknown function DUF260;1.9e-73	---	---	---	---	18402268 // expressed protein protein id: At2g30130.1, supported by cDNA: 29970. [Arabidopsis thaliana];1e-43 /// 15221679 // hypothetical protein protein id: At1g31320.1 [Arabidopsis thaliana];4e-96	protein_coding	LOB domain-containing protein 4		LOB domain-containing protein 4 (LBD4); CONTAINS InterPro DOMAIN/s: Lateral organ boundaries, LOB (InterPro:IPR004883); BEST Arabidopsis thaliana protein match is: ASYMMETRIC LEAVES 2-like 9 (TAIR:AT1G16530.1); Has 1039 Blast hits to 1034 proteins in 25 species: Archae - 0; Bacteria - 0; Metazoa - 0; Fungi - 0; Plants - 1039; Viruses - 0; Other Eukaryotes - 0 (source: NCBI BLink).
AT2G39700	267590_at	7.79178e-14	0.0133344	0.0978206	0.00101354	0.00522552	0.000208395	0.952192	0.119463	86.0185	2.18165	Arabidopsis thaliana	Exemplar	putative expansin ;supported by full-length cDNA: Ceres:17353.	---	expansin, putative (EXP4)	---	AGI:At2g39700	---	---	---	Pollen_allergen // Pollen allergen;6.1e-44	PR01225 // Expansin/Lol pI family signature;3.6e-86	---	---	---	21553844 // Alpha-expansin 4 precursor (At-EXP4) (AtEx4) (Ath-ExpAlpha-1.6) [Arabidopsis thaliana];e-151 /// 15225530 // expansin, putative protein id: At2g39700.1, supported by cDNA: 17353., supported by cDNA: gi_15294171, supported by cDNA: gi_17065213, supported by cDNA: gi_20259979 [Arabidopsis thaliana];e-153	protein_coding	expansin A4	putative expansin. Naming convention from the Expansin Working Group (Kende et al, 2004. Plant Mol Bio). Involved in the formation of nematode-induced syncytia in roots of Arabidopsis thaliana.	expansin A4 (EXPA4); CONTAINS InterPro DOMAIN/s: Barwin-related endoglucanase (InterPro:IPR009009), Pollen allergen, N-terminal (InterPro:IPR014734), Expansin (InterPro:IPR002963), Rare lipoprotein A (InterPro:IPR005132), Expansin/Lol pI (InterPro:IPR007118), Expansin 45, endoglucanase-like (InterPro:IPR007112), Pollen allergen/expansin, C-terminal (InterPro:IPR007117); BEST Arabidopsis thaliana …
AT3G45700	252536_at	0.00920859	1.78411e-06	2.09474e-06	0.0831398	7.71102e-05	0.109405	0.895144	3.96444e-06	83.2715	2.40084	Arabidopsis thaliana	Exemplar	'putative transporter protein peptide transport protein - Hordeum vulgare, PIR:T04378'	---	transporter protein -related	---	AGI:At3g45700	---	---	5215 // transporter activity // extended:inferred from electronic annotation; PTR2; 4.5e-47	PTR2 // POT family;4.5e-47	IPB000109 // PTR peptide transporters (PTR2);1.6e-46	---	numtm:12;Nin-prob:0.86088;Type:;Span:TM from 20 to 42: Eval:0.92863/TM from 57 to 79: Eval:0.90485/TM from 86 to 108: Eval:0.74789/TM from 134 to 156: Eval:0.79236/TM from 172 to 194: Eval:0.68241/TM from 198 to 220: Eval:0.80004/TM from 317 to 339: Eval:0.57497/TM from 354 to 376: Eval:0.83277/TM from 396 to 415: Eval:0.41023/TM from 430 to 452: Eval:0.39039/TM from 465 to 487: Eval:0.79047/TM f…	---	15231217 // putative transporter protein protein id: At3g45700.1 [Arabidopsis thaliana];0.0 /// 26449486 // putative transporter protein [Arabidopsis thaliana];0.0	protein_coding	Major facilitator superfamily protein		Major facilitator superfamily protein; FUNCTIONS IN: transporter activity; INVOLVED IN: oligopeptide transport; LOCATED IN: membrane; EXPRESSED IN: hypocotyl, root; CONTAINS InterPro DOMAIN/s: PTR2 family proton/oligopeptide symporter, conserved site (InterPro:IPR018456), Oligopeptide transporter (InterPro:IPR000109), Major facilitator superfamily, general substrate transporter (InterPro:IPR01619…
AT3G45070	252605_s_at	0.202231	4.5936e-09	0.0246887	0.000257841	0.000217422	0.47739	0.00910324	4.2539e-05	81.7991	4.16917	Arabidopsis thaliana	Exemplar	'sulfotransferase-like protein FLAVONOL 4 -SULFOTRANSFERASE - Flaveria chloraefolia, EMBL:M84136'	At3g45070:At3g45080 (2 transcripts, 2 gene clusters)	sulfotransferase family	---	AGI:At3g45070	---	---	8146 // sulfotransferase activity // extended:inferred from expression pattern; Sulfotransfer; 2.6e-104	Sulfotransfer // Sulfotransferase protein;2.6e-104	IPB000863 // Sulfotransferase;6.6e-98	d1aqua_ // c.37.1.5 // Estrogen sulfotransferase;2.72e-94	---	EC:2.8.2.4 // SUOE_HUMAN ESTROGEN SULFOTRANSFERASE (EC 2.8.2.4) (SULFOTRANSFERASE, ESTROGEN- PREFERRING) (EST-1).;1.13e-93	15230602 // sulfotransferase-like protein protein id: At3g45070.1 [Arabidopsis thaliana];0.0 /// 15230603 // sulfotransferase-like protein protein id: At3g45080.1 [Arabidopsis thaliana];e-162	protein_coding	P-loop containing nucleoside triphosphate hydrolases superfamily protein		P-loop containing nucleoside triphosphate hydrolases superfamily protein; FUNCTIONS IN: sulfotransferase activity; INVOLVED IN: biological_process unknown; LOCATED IN: cellular_component unknown; CONTAINS InterPro DOMAIN/s: Sulfotransferase domain (InterPro:IPR000863); BEST Arabidopsis thaliana protein match is: P-loop containing nucleoside triphosphate hydrolases superfamily protein (TAIR:AT3G45…
AT1G28100	259586_at	0.000448146	2.70098e-06	0.000404588	1.40411e-07	0.00220819	0.721184	0.354345	0.0117146	80.8637	2.1023	Arabidopsis thaliana	Exemplar	unknown protein	---	expressed protein	---	AGI:At1g28100	---	---	---	---	---	---	---	---	15217821 // unknown protein protein id: At1g28100.1 [Arabidopsis thaliana];e-158 /// 26452923 // unknown protein [Arabidopsis thaliana];e-146	protein_coding			unknown protein; Has 64 Blast hits to 64 proteins in 27 species: Archae - 0; Bacteria - 14; Metazoa - 0; Fungi - 6; Plants - 42; Viruses - 0; Other Eukaryotes - 2 (source: NCBI BLink).
AT1G04250	263664_at	0.030861	0.00280346	5.32702e-06	1.10389e-07	0.0307517	0.770675	0.138712	4.29183e-06	80.2046	2.02935	Arabidopsis thaliana	Exemplar	'putative auxin-induced protein, IAA17/AXR3-1 Identical to Arabidopsis gb|AF040632 and gb|U49073 IAA17/AXR3 gene. ESTs gb|H36782 and gb|F14074 come from this gene;supported by full-length cDNA: Ceres:33613.'	---	auxin-responsive protein IAA17 (Indoleacetic acid-induced protein 17)	IAA17	AGI:At1g04250	6445 // regulation of translation // extended:inferred from electronic annotation; AUX_IAA; 2.3e-100	---	---	AUX_IAA // AUX/IAA family;2.3e-100	IPB003311 // AUX/IAA family;1.4e-78	---	---	---	15219694 // putative auxin-induced protein, IAA17/AXR3-1 protein id: At1g04250.1, supported by cDNA: 33613., supported by cDNA: gi_12484196, supported by cDNA: gi_2618722 [Arabidopsis thaliana];e-133 /// 21592887 // putative auxin-induced protein, IAA17/AXR3-1 [Arabidopsis thaliana];e-132	protein_coding	AUX/IAA transcriptional regulator family protein	Transcription regulator acting as repressor of auxin-inducible gene expression. Auxin-inducible AUX/IAA gene. Short-lived nuclear protein with four conserved domains. Domain III has homology to beta alpha alpha dimerization and DNA binding domains. Involved in auxin signaling. Auxin induces the degradation of the protein in a dosage-dependent manner in a process mediated by AtRac1. Auxin induced …	AUXIN RESISTANT 3 (AXR3); CONTAINS InterPro DOMAIN/s: Aux/IAA-ARF-dimerisation (InterPro:IPR011525), AUX/IAA protein (InterPro:IPR003311); BEST Arabidopsis thaliana protein match is: indole-3-acetic acid inducible 14 (TAIR:AT4G14550.1); Has 1763 Blast hits to 1762 proteins in 78 species: Archae - 0; Bacteria - 0; Metazoa - 0; Fungi - 0; Plants - 1762; Viruses - 0; Other Eukaryotes - 1 (source: NC…
AT3G22231	256766_at	3.29054e-13	1.83036e-09	0.259043	0.849188	0.0748769	0.502374	0.974867	0.877695	77.634	2.11395	Arabidopsis thaliana	Exemplar	Expressed protein ; supported by cDNA: gi_14335055_gb_AY037207.1_	---	expressed protein	---	AGI:At3g22231	---	---	---	---	---	---	---	---	17065452 // Unknown protein [Arabidopsis thaliana];3e-27 /// 18403306 // Expressed protein protein id: At3g22231.1, supported by cDNA: gi_14335055 [Arabidopsis thaliana];2e-43	protein_coding	pathogen and circadian controlled 1	Encodes a member of a novel 6 member Arabidopsis gene family. Expression of PCC1 is regulated by the circadian clock and is upregulated in response to both virulent and avirulent strains of Pseudomonas syringae pv. tomato.	PATHOGEN AND CIRCADIAN CONTROLLED 1 (PCC1); FUNCTIONS IN: molecular_function unknown; INVOLVED IN: response to fungus, response to bacterium; LOCATED IN: plasma membrane; EXPRESSED IN: 20 plant structures; EXPRESSED DURING: 13 growth stages; BEST Arabidopsis thaliana protein match is: unknown protein (TAIR:AT3G22235.2); Has 49 Blast hits to 49 proteins in 2 species: Archae - 0; Bacteria - 0; Meta…
AT4G38840	252972_at	1.84415e-13	1.65273e-06	0.119334	0.379182	0.0702878	0.116616	0.665486	0.0645877	77.4456	2.12499	Arabidopsis thaliana	Exemplar	'auxin-induced protein - like auxin-inducible SAUR gene, Raphanus sativus,AB000708;supported by full-length cDNA: Ceres:10140.'	---	auxin-induced (indole-3-acetic acid induced) protein, putative	---	AGI:At4g38840	---	---	---	Auxin_inducible // Auxin responsive protein;9.2e-46	IPB003676 // Auxin responsive SAUR protein;7.7e-53	---	---	---	15234825 // auxin-induced protein - like protein id: At4g38840.1, supported by cDNA: 10140. [Arabidopsis thaliana];1e-49 /// 15226485 // putative auxin-regulated protein protein id: At2g21210.1 [Arabidopsis thaliana];3e-31	protein_coding	SAUR-like auxin-responsive protein family		SAUR-like auxin-responsive protein family ; FUNCTIONS IN: molecular_function unknown; INVOLVED IN: response to auxin stimulus, response to cold; LOCATED IN: plasma membrane; EXPRESSED IN: 21 plant structures; EXPRESSED DURING: 13 growth stages; CONTAINS InterPro DOMAIN/s: Auxin responsive SAUR protein (InterPro:IPR003676); BEST Arabidopsis thaliana protein match is: SAUR-like auxin-responsive pro…
AT2G38760	266419_at	0.355903	4.6309e-08	0.000180897	0.00122994	0.00044195	0.0934722	0.650046	0.000100804	76.415	2.99543	Arabidopsis thaliana	Exemplar	putative annexin ;supported by full-length cDNA: Ceres:3294.	---	annexin -related	---	AGI:At2g38760	---	---	5509 // calcium ion binding activity // extended:traceable author statement; annexin; 5.6e-29	annexin // Annexin;1.7e-73	IPB001464 // Annexin family;1.4e-95	d1dk5a_ // a.65.1.1 // Annexin 24(ca32);5.41e-95	---	---	6503082 // AnnAt3 [Arabidopsis thaliana];e-179 /// 15224947 // putative annexin protein id: At2g38760.1, supported by cDNA: 3294., supported by cDNA: gi_6503081 [Arabidopsis thaliana];e-180	protein_coding	annexin 3	Annexins are calcium binding proteins that are localized in the cytoplasm. When cytosolic Ca2+ increases, they relocate to the plasma membrane.	annexin 3 (ANNAT3); FUNCTIONS IN: calcium-dependent phospholipid binding, calcium ion binding; INVOLVED IN: response to water deprivation, response to salt stress, response to cold, response to heat; LOCATED IN: vacuole, cell surface; EXPRESSED IN: 21 plant structures; EXPRESSED DURING: 8 growth stages; CONTAINS InterPro DOMAIN/s: Annexin like protein (InterPro:IPR015472), Annexin repeat (InterPr…
AT1G69530	256299_at	7.85355e-10	4.4377e-09	0.134363	0.128112	0.733968	0.0308778	0.14908	0.0594406	76.1355	2.27879	Arabidopsis thaliana	Exemplar	expansin (At-EXP1) identical to expansin (At-EXP1) [Arabidopsis thaliana] GI:1041702;supported by full-length cDNA: Ceres:255048.	---	expansin, putative (EXP1)	---	AGI:At1g69530	---	---	---	Pollen_allergen // Pollen allergen;1.1e-46	PR01225 // Expansin/Lol pI family signature;2.4e-84	---	---	---	15222356 // expansin (At-EXP1) protein id: At1g69530.1, supported by cDNA: 255048., supported by cDNA: gi_13430757, supported by cDNA: gi_15293226 [Arabidopsis thaliana];e-150 /// 11281293 // expansin EXP1 [imported] - Arabidopsis thaliana (fragment);e-140	protein_coding	expansin A1	Member of Alpha-Expansin Gene Family. Naming convention from the Expansin Working Group (Kende et al, Plant Mol Bio). Involved in the formation of nematode-induced syncytia in roots of Arabidopsis thaliana.	expansin A1 (EXPA1); CONTAINS InterPro DOMAIN/s: Pollen allergen, N-terminal (InterPro:IPR014734), Rare lipoprotein A (InterPro:IPR005132), Pollen allergen/expansin, C-terminal (InterPro:IPR007117), Barwin-related endoglucanase (InterPro:IPR009009), Expansin (InterPro:IPR002963), Expansin/Lol pI (InterPro:IPR007118), Expansin 45, endoglucanase-like (InterPro:IPR007112); BEST Arabidopsis thaliana …
AT2G03090	266770_at	3.58717e-05	1.03882e-06	4.21691e-08	0.181297	0.121755	0.159891	0.596751	0.0100602	74.669	2.06671	Arabidopsis thaliana	Exemplar	putative expansin Experimental evidence from Dr. Daniel Cosgrove at Penn State Univ. <dCosgrove@psu.edu>	---	expansin, putative (EXP15)	---	AGI:At2g03090	---	---	---	Pollen_allergen // Pollen allergen;9e-48	PR01225 // Expansin/Lol pI family signature;8.2e-85	---	numtm:0;Nin-prob:0.80325;Type:SIGNAL;Span:	---	22325441 // expansin, putative protein id: At2g03090.1, supported by cDNA: gi_18176130 [Arabidopsis thaliana];e-152 /// 20137710 // Alpha-expansin 15 precursor (At-EXP15) (AtEx15) (Ath-ExpAlpha-1.3);e-149	protein_coding	expansin A15	member of Alpha-Expansin Gene Family. Naming convention from the Expansin Working Group (Kende et al, 2004. Plant Mol Bio). Involved in the formation of nematode-induced syncytia in roots of Arabidopsis thaliana.	expansin A15 (EXPA15); INVOLVED IN: plant-type cell wall modification involved in multidimensional cell growth, syncytium formation, unidimensional cell growth, plant-type cell wall loosening; LOCATED IN: endomembrane system, extracellular region; EXPRESSED IN: 25 plant structures; EXPRESSED DURING: 13 growth stages; CONTAINS InterPro DOMAIN/s: Pollen allergen, N-terminal (InterPro:IPR014734), Ra…
AT3G07390	259018_at	1.01253e-16	0.260012	0.370722	0.000224981	0.68754	0.130291	0.233848	0.877553	74.3912	3.82543	Arabidopsis thaliana	Exemplar	unknown protein similar to unknown protein GB:AAC62613 [Arabidopsis thaliana]; supported by cDNA: gi_14532567_gb_AY039908.1_	---	auxin-induced protein (AIR12)	---	AGI:At3g07390	---	---	---	---	---	---	---	---	6041839 // unknown protein [Arabidopsis thaliana];3e-89 /// 22330908 // expressed protein protein id: At3g07390.1, supported by cDNA: gi_18426883, supported by cDNA: gi_18655402 [Arabidopsis thaliana];3e-89	protein_coding	auxin-responsive family protein	isolated from differential screening of a cDNA library from auxin-treated root culture. sequence does not show homology to any known proteins and is predicted to be extracellular.	Auxin-Induced in Root cultures 12 (AIR12); FUNCTIONS IN: extracellular matrix structural constituent; INVOLVED IN: response to auxin stimulus, lateral root morphogenesis, extracellular matrix organization; LOCATED IN: extracellular region, anchored to plasma membrane, plasma membrane, anchored to membrane; EXPRESSED IN: 26 plant structures; EXPRESSED DURING: 13 growth stages; CONTAINS InterPro DO…
AT3G29250	257774_at	0.0103973	1.07127e-09	0.0465155	7.06165e-06	0.222542	0.804227	0.406978	0.000284713	73.4807	3.86979	Arabidopsis thaliana	Exemplar	'short-chain alcohol dehydrogenase, putative similar to short-chain alcohol dehydrogenase GB:AAF04194 [Pisum sativum]; contains Pfam profile: PF00106 short chain dehydrogenase'	---	short-chain dehydrogenase/reductase family protein	---	AGI:At3g29250	---	---	16491 // oxidoreductase activity // extended:Unknown; adh_short; 1.6e-61	adh_short // short chain dehydrogenase;1.3e-51	IPB002198 // Short-chain dehydrogenase/reductase (SDR) superfamily;1.5e-10	d1fmca_ // c.2.1.2 // 7-alpha-hydroxysteroid dehydrogenase;8.31e-58	---	EC:1.1.1.53 // 2BHD_STREX 20-BETA-HYDROXYSTEROID DEHYDROGENASE (EC 1.1.1.53).;2.78e-60 /// EC:1.3.1.19 // TODD_PSEPU CIS-TOLUENE DIHYDRODIOL DEHYDROGENASE (EC 1.3.1.19).;4.39e-62	9293918 // alcohol dehydrogenase-like protein [Arabidopsis thaliana];e-134 /// 22331405 // ;0.0	protein_coding	NAD(P)-binding Rossmann-fold superfamily protein		NAD(P)-binding Rossmann-fold superfamily protein; FUNCTIONS IN: oxidoreductase activity, copper ion binding; INVOLVED IN: oxidation reduction, metabolic process; LOCATED IN: cellular_component unknown; EXPRESSED IN: 6 plant structures; EXPRESSED DURING: 4 anthesis; CONTAINS InterPro DOMAIN/s: NAD(P)-binding domain (InterPro:IPR016040), Glucose/ribitol dehydrogenase (InterPro:IPR002347), Short-cha…
AT1G17190	262516_at	0.0356104	8.42665e-08	0.00355861	0.00233147	0.000246361	0.396913	0.370207	0.000111948	73.0696	3.22182	Arabidopsis thaliana	Exemplar	putative glutathione transferase One of three repeated glutathione transferases. 65% identical to glutathione transferase [Arabidopsis thaliana] (gi|4006934). Location of est 141C5T7 (gb|T46669)	---	glutathione transferase, putative	---	AGI:At1g17190	---	---	---	GST_N // Glutathione S-transferase, N-terminal domain;4.9e-16 /// GST_C // Glutathione S-transferase, C-terminal domain;1.6e-07	---	d1gwca1 // a.45.1.1 // Glutathione S-transferase;1.73e-38 /// d1gwca2 // c.47.1.5 // Glutathione S-transferase;1.38e-25	---	EC:4.5.1.3 // DCMA_METSP DICHLOROMETHANE DEHALOGENASE (EC 4.5.1.3) (DCM DEHALOGENASE).;9.94e-50 /// EC:2.5.1.18 // MAAI_HUMAN MALEYLACETOACETATE ISOMERASE (EC 5.2.1.2) (MAAI) (GLUTATHIONE S- TRANSFERASE ZETA 1) (EC 2.5.1.18) (GSTZ1-1).;5.96e-56 /// EC:5.2.1.2 // MAAI_HUMAN MALEYLACETOACETATE ISOMERASE (EC 5.2.1.2) (MAAI) (GLUTATHIONE S- TRANSFERASE ZETA 1) (EC 2.5.1.18) (GSTZ1-1).;5.56e-56	15220041 // glutathione transferase, putative protein id: At1g17180.1 [Arabidopsis thaliana];1e-85 /// 15220042 // glutathione transferase, putative protein id: At1g17190.1 [Arabidopsis thaliana];e-129	protein_coding	glutathione S-transferase tau 26	Encodes glutathione transferase belonging to the tau class of GSTs. Naming convention according to Wagner et al. (2002).	glutathione S-transferase tau 26 (GSTU26); CONTAINS InterPro DOMAIN/s: Thioredoxin fold (InterPro:IPR012335), Glutathione S-transferase, C-terminal (InterPro:IPR004046), Glutathione S-transferase, C-terminal-like (InterPro:IPR010987), Glutathione S-transferase/chloride channel, C-terminal (InterPro:IPR017933), Glutathione S-transferase, N-terminal (InterPro:IPR004045), Thioredoxin-like fold (Inte…
AT3G07350	259015_at	8.99529e-07	9.61548e-11	0.0679819	0.01291	0.111929	0.811643	0.100031	0.59207	71.0523	2.16437	Arabidopsis thaliana	Exemplar	unknown protein similar to hypothetical protein GB:AAC17612 [Arabidopsis thaliana];supported by full-length cDNA: Ceres:251012.	---	expressed protein	---	AGI:At3g07350	---	---	---	---	---	---	---	---	21554332 // unknown [Arabidopsis thaliana];e-170 /// 18397919 // expressed protein protein id: At3g07350.1, supported by cDNA: 251012., supported by cDNA: gi_15028230, supported by cDNA: gi_21280936 [Arabidopsis thaliana];e-170	protein_coding	Protein of unknown function (DUF506)		Protein of unknown function (DUF506) ; CONTAINS InterPro DOMAIN/s: Protein of unknown function DUF506, plant (InterPro:IPR006502); BEST Arabidopsis thaliana protein match is: Protein of unknown function (DUF506) (TAIR:AT3G25240.1); Has 393 Blast hits to 390 proteins in 24 species: Archae - 0; Bacteria - 0; Metazoa - 0; Fungi - 0; Plants - 391; Viruses - 0; Other Eukaryotes - 2 (source: NCBI BLink…
AT3G01390	258958_at	1.10987e-14	0.0690855	0.0344461	0.0347359	0.635476	0.00667244	0.825044	0.242751	70.1206	2.72407	Arabidopsis thaliana	Exemplar	vacuolar membrane ATPase subunit G (AVMA10) identical to vacuolar membrane ATPase subunit G (AVMA10) GB:AF181688 [Arabidopsis thaliana]; supported by cDNA: gi_5853314_gb_AF181688.1_AF181688	---	vacuolar membrane ATPase subunit G (AVMA10)	---	AGI:At3g01390	---	---	---	V-ATPase_G // Vacuolar (H+)-ATPase G subunit;1.7e-58	---	---	---	---	15232110 // vacuolar membrane ATPase subunit G (AVMA10) protein id: At3g01390.1, supported by cDNA: gi_18252860, supported by cDNA: gi_5853314 [Arabidopsis thaliana];5e-54 /// 12585428 // Vacuolar ATP synthase subunit G 1 (V-ATPase G subunit 1) (Vacuolar proton pump G subunit 1);1e-40	protein_coding	vacuolar membrane ATPase 10	Subunit G of the vacuolar membrane ATPAse complex	vacuolar membrane ATPase 10 (VMA10); FUNCTIONS IN: hydrogen ion transporting ATP synthase activity, rotational mechanism; INVOLVED IN: ATP hydrolysis coupled proton transport; LOCATED IN: plasma membrane, proton-transporting two-sector ATPase complex, vacuole, plant-type vacuole; EXPRESSED IN: 24 plant structures; EXPRESSED DURING: 13 growth stages; CONTAINS InterPro DOMAIN/s: Vacuolar (H+)-ATPas…
AT1G47400	261684_at	1.6082e-10	2.28764e-08	0.0800359	0.772449	0.576762	0.896594	0.109112	0.138718	68.9284	2.44744	Arabidopsis thaliana	Exemplar	hypothetical protein predicted by genemark.hmm	---	hypothetical protein	---	AGI:At1g47400	---	---	---	---	---	---	---	---	15220189 // ;2e-21 /// 27311603 // Unknown protein [Arabidopsis thaliana];1e-15	protein_coding			unknown protein; BEST Arabidopsis thaliana protein match is: unknown protein (TAIR:AT1G47395.1); Has 11 Blast hits to 11 proteins in 2 species: Archae - 0; Bacteria - 0; Metazoa - 0; Fungi - 0; Plants - 11; Viruses - 0; Other Eukaryotes - 0 (source: NCBI BLink).
AT5G23820	249817_at	4.46192e-13	0.112206	0.843351	8.64875e-06	0.133361	0.578658	0.436285	0.222333	68.3097	2.14086	Arabidopsis thaliana	Exemplar	putative protein similar to unknown protein (pir||T00970); supported by cDNA: gi_15215722_gb_AY050390.1_	---	expressed protein	---	AGI:At5g23820	---	---	---	E1_DerP2_DerF2 // ML domain;3e-37	---	---	---	---	15237840 // putative protein protein id: At5g23840.1, supported by cDNA: 4716. [Arabidopsis thaliana];1e-67 /// 15237836 // putative protein protein id: At5g23820.1, supported by cDNA: gi_15215722, supported by cDNA: gi_20453248 [Arabidopsis thaliana];6e-90	protein_coding	MD-2-related lipid recognition domain-containing protein		MD-2-related lipid recognition domain-containing protein; FUNCTIONS IN: molecular_function unknown; INVOLVED IN: biological_process unknown; LOCATED IN: vacuole; EXPRESSED IN: 20 plant structures; EXPRESSED DURING: 13 growth stages; CONTAINS InterPro DOMAIN/s: MD-2-related lipid-recognition (InterPro:IPR003172); BEST Arabidopsis thaliana protein match is: MD-2-related lipid recognition domain-con…
AT5G47950	248723_at	0.0326978	1.46684e-05	3.98313e-05	1.0829e-05	0.0912238	0.998762	0.619231	0.000293605	67.9836	2.22374	Arabidopsis thaliana	Exemplar	acetyl-CoA:benzylalcohol acetyltranferase-like protein	---	acyltransferase family	---	AGI:At5g47950	---	---	---	Transferase // Transferase family;1.8e-118	---	---	---	---	15238850 // acyltransferase family protein id: At5g47950.1 [Arabidopsis thaliana];0.0 /// 15230740 // acyltransferase family protein id: At3g30280.1 [Arabidopsis thaliana];e-144	protein_coding	HXXXD-type acyl-transferase family protein		HXXXD-type acyl-transferase family protein; FUNCTIONS IN: transferase activity, transferring acyl groups other than amino-acyl groups, transferase activity; INVOLVED IN: biological_process unknown; LOCATED IN: cellular_component unknown; EXPRESSED IN: root; CONTAINS InterPro DOMAIN/s: Transferase (InterPro:IPR003480); BEST Arabidopsis thaliana protein match is: HXXXD-type acyl-transferase family …
AT5G48010	248729_at	0.319523	3.25456e-10	0.246847	1.85004e-07	0.203514	0.651018	0.241551	0.0319655	67.48	3.09254	Arabidopsis thaliana	Exemplar	cycloartenol synthase	---	pentacyclic triterpene synthase (04C11) (ATPEN1), putative	ATPEN1	AGI:At5g48010	---	---	3824 // enzyme activity // extended:inferred from electronic annotation; prenyltrans; 1.9e-05 /// 16871 // cycloartenol synthase activity // extended:Unknown; 5.4.99.8; 1e-300	prenyltrans // Prenyltransferase and squalene oxidase re;1.9e-21	IPB002365 // Terpene synthase;3.5e-102	d2sqca1 // a.102.4.2 // Squalene-hopene cyclase;3.46e-127	---	EC:5.4.99.8 // CAS1_ARATH CYCLOARTENOL SYNTHASE (EC 5.4.99.8) (2,3-EPOXYSQUALENE--CYCLOARTENOL CYCLASE).;1e-300	15238869 // pentacyclic triterpene synthase (04C11) (ATPEN1), putative protein id: At5g48010.1 [Arabidopsis thaliana];0.0 /// 15233798 // ;0.0	protein_coding	thalianol synthase 1	Encodes an oxidosqualene cyclase involved in the biosynthesis of thalianol, a tricyclic triterpenoid of unknown function. Overexpression of THAS leads to dwarfing in the aerial tissues of Arabidopsis plants, but increases their root length. THAS is part of a small operon-like cluster of genes (with At5g48000 (THAH) and At5g47990 (THAD)) involved in thalianol metabolism.	thalianol synthase 1 (THAS1); CONTAINS InterPro DOMAIN/s: Terpene synthase, conserved site (InterPro:IPR002365), Terpenoid cylases/protein prenyltransferase alpha-alpha toroid (InterPro:IPR008930), Squalene cyclase (InterPro:IPR018333), Prenyltransferase/squalene oxidase (InterPro:IPR001330); BEST Arabidopsis thaliana protein match is: baruol synthase 1 (TAIR:AT4G15370.1); Has 35333 Blast hits to…
AT5G47990	248727_at	0.406757	1.32437e-11	0.243389	8.10879e-06	0.210576	0.731357	0.52989	0.00767846	67.0245	3.89224	Arabidopsis thaliana	Exemplar	cytochrome P450	---	cytochrome P450 family	---	AGI:At5g47990	6118 // electron transport // extended:inferred from electronic annotation; p450; 5.5e-93	---	---	p450 // Cytochrome P450;5.5e-93	IPB001128 // none;1.7e-05	d1dt6a_ // a.104.1.1 // Mammalian cytochrome p450 2c5;5.02e-124	---	EC:5.3.99.5 // THAS_HUMAN THROMBOXANE-A SYNTHASE (EC 5.3.99.5) (TXA SYNTHASE) (TXS).;5.45e-132 /// EC:1.14.13.11 // TCMO_ZINEL TRANS-CINNAMATE 4-MONOOXYGENASE (EC 1.14.13.11) (CINNAMIC ACID 4-HYDROXYLASE) (CA4H) (C4H) (P450C4H) (CYTOCHROME P450 73).;5.37e-135 /// EC:1.14.99.10 // CPS1_HUMAN CYTOCHROME P450 XXIB (EC 1.14.99.10) (STEROID 21-HYDROXYLASE) (P450-C21B).;1.56e-128 /// EC:1.1.3.34 // CP8…	15238866 // cytochrome p450 family protein id: At5g47990.1 [Arabidopsis thaliana];0.0 /// 15233774 // cytochrome p450 family protein id: At4g15350.1 [Arabidopsis thaliana];0.0	protein_coding	cytochrome P450, family 705, subfamily A, polypeptide 5	encodes a member of the CYP705A family of cytochrome P450 enzymes. It appears to catalyze the addition of a double bond to thalian-diol at carbon 15. Reduced levels of THAD expression lead to a build up of thalian-diol in root extracts. thad1-1 mutants also have longer roots than wild type seedlings.	cytochrome P450, family 705, subfamily A, polypeptide 5 (CYP705A5); FUNCTIONS IN: oxygen binding, thalian-diol desaturase activity; INVOLVED IN: thalianol metabolic process, root development; LOCATED IN: endoplasmic reticulum; EXPRESSED IN: hypocotyl, root, callus; CONTAINS InterPro DOMAIN/s: Cytochrome P450 (InterPro:IPR001128), Cytochrome P450, conserved site (InterPro:IPR017972), Cytochrome P4…
AT4G15660	245504_at	7.6325e-06	0.00214283	2.50616e-06	0.121883	0.168548	0.00211875	0.263667	0.0239989	66.2636	2.02739	Arabidopsis thaliana	Exemplar	glutaredoxin	---	glutaredoxin protein family	---	AGI:At4g15660	---	---	9491 // redox-active disulfide bond electron carrier // extended:traceable author statement; glutaredoxin; 6.2e-06	glutaredoxin // Glutaredoxin;6.2e-06	IPB002109 // Glutaredoxin;3.2e-14	d3grx__ // c.47.1.1 // Glutaredoxin (Thioltransferase);6.45e-19	---	---	15234673 // glutaredoxin protein id: At4g15670.1 [Arabidopsis thaliana];2e-49 /// 15234671 // glutaredoxin protein id: At4g15660.1 [Arabidopsis thaliana];6e-53	protein_coding	Thioredoxin superfamily protein		Thioredoxin superfamily protein; FUNCTIONS IN: electron carrier activity, arsenate reductase (glutaredoxin) activity, protein disulfide oxidoreductase activity; INVOLVED IN: cell redox homeostasis; LOCATED IN: endomembrane system; EXPRESSED IN: 16 plant structures; EXPRESSED DURING: 10 growth stages; CONTAINS InterPro DOMAIN/s: Glutaredoxin-like, plant II (InterPro:IPR011905), Glutaredoxin (Inter…
AT1G03850	265067_at	2.48824e-06	0.0841689	0.00234156	3.20411e-05	0.075248	0.0082179	0.0920169	0.0202151	65.5846	2.15192	Arabidopsis thaliana	Exemplar	hypothetical protein predicted by genefinder;supported by full-length cDNA: Ceres:271253.	---	glutaredoxin protein family	---	AGI:At1g03850	---	---	---	---	IPB002109 // Glutaredoxin;0.0027	---	---	---	18379149 // expressed protein protein id: At1g03850.1, supported by cDNA: 271253., supported by cDNA: gi_14334677, supported by cDNA: gi_17104674 [Arabidopsis thaliana];2e-82 /// 29028802 // At1g03849 [Arabidopsis thaliana];5e-74	protein_coding	Glutaredoxin family protein		Glutaredoxin family protein; FUNCTIONS IN: electron carrier activity, protein disulfide oxidoreductase activity; INVOLVED IN: response to cytokinin stimulus; EXPRESSED IN: 14 plant structures; EXPRESSED DURING: 9 growth stages; CONTAINS InterPro DOMAIN/s: Glutaredoxin-like, plant II (InterPro:IPR011905), Thioredoxin fold (InterPro:IPR012335), Glutaredoxin (InterPro:IPR002109), Thioredoxin-like fo…
AT1G76410	259982_at	3.28097e-05	3.88404e-09	0.263751	0.0186576	0.0648187	0.0143464	0.163654	0.203331	65.4821	2.0979	Arabidopsis thaliana	Exemplar	'putative RING zinc finger protein contains Pfam profile: PF00097 Zinc finger, C3HC4 type (RING finger); supported by full-length cDNA: Ceres: 27464. '	---	RING zinc finger protein -related	---	AGI:At1g76410	---	---	---	zf-C3HC4 // Zinc finger, C3HC4 type (RING finger);2e-05	IPB001841 // RING finger;0.0044	d1chc__ // g.44.1.1 // Immediate early protein, IEEHV;5.74e-14	numtm:0;Nin-prob:0.01956;Type:SIGNAL;Span:	---	15223041 // putative RING zinc finger protein protein id: At1g76410.1, supported by cDNA: 27464. [Arabidopsis thaliana];e-105 /// 21555237 // putative RING zinc finger protein [Arabidopsis thaliana];e-104	protein_coding	RING/U-box superfamily protein		ATL8; FUNCTIONS IN: zinc ion binding; EXPRESSED IN: 22 plant structures; EXPRESSED DURING: 13 growth stages; CONTAINS InterPro DOMAIN/s: Zinc finger, RING-type (InterPro:IPR001841), Zinc finger, C3HC4 RING-type (InterPro:IPR018957); BEST Arabidopsis thaliana protein match is: RING/U-box superfamily protein (TAIR:AT1G20823.1); Has 9001 Blast hits to 8977 proteins in 267 species: Archae - 0; Bacter…
AT4G28250	253815_at	9.21416e-11	0.130696	0.0103202	0.0014602	0.0411745	0.213764	0.11236	0.167284	64.8525	2.44379	Arabidopsis thaliana	Exemplar	'putative beta-expansin/allergen protein soybean pollen allergen (cim1) protein - soybean, PIR2:S48032;supported by full-length cDNA: Ceres:33023.'	---	beta-expansin, putative (EXPB3)	---	AGI:At4g28250	---	---	---	Pollen_allergen // Pollen allergen;1.2e-35	PR00829 // Major pollen allergen Lol pI signature;6.8e-09	---	---	---	21592834 // putative beta-expansin/allergen protein [Arabidopsis thaliana];e-152 /// 18417157 // beta-expansin pollen allergen protein protein id: At4g28250.1, supported by cDNA: 33023., supported by cDNA: gi_14532723 [Arabidopsis thaliana];e-156	protein_coding	expansin B3	putative beta-expansin/allergen protein. Naming convention from the Expansin Working Group (Kende et al, 2004. Plant Mol Bio). Involved in the formation of nematode-induced syncytia in roots of Arabidopsis thaliana.	expansin B3 (EXPB3); INVOLVED IN: response to cyclopentenone, syncytium formation, plant-type cell wall organization, unidimensional cell growth, plant-type cell wall loosening; LOCATED IN: endomembrane system, extracellular region; EXPRESSED IN: 21 plant structures; EXPRESSED DURING: 13 growth stages; CONTAINS InterPro DOMAIN/s: Pollen allergen, N-terminal (InterPro:IPR014734), Rare lipoprotein …
AT3G59670	251476_at	0.00142772	5.5434e-11	0.0257871	0.00200168	0.0625039	0.973612	0.280098	0.474119	64.7155	2.07282	Arabidopsis thaliana	Exemplar	'putative protein hypothetical protein F6G17.90 - Arabidopsis thaliana, PIR:T04738'	---	hypothetical protein	---	AGI:At3g59670	---	---	---	---	---	---	---	---	15235560 // putative protein protein id: At4g37440.1, supported by cDNA: gi_20465734 [Arabidopsis thaliana];6e-36 /// 15231731 // putative protein protein id: At3g59670.1 [Arabidopsis thaliana];0.0	protein_coding			unknown protein; BEST Arabidopsis thaliana protein match is: unknown protein (TAIR:AT4G37440.2); Has 77 Blast hits to 77 proteins in 14 species: Archae - 0; Bacteria - 0; Metazoa - 0; Fungi - 0; Plants - 73; Viruses - 0; Other Eukaryotes - 4 (source: NCBI BLink).
AT5G51440	248434_at	0.107909	2.80565e-13	0.00523816	0.877903	0.00190437	0.185475	0.952723	0.752101	64.6215	2.34093	Arabidopsis thaliana	Exemplar	mitochondrial heat shock 22 kd protein-like ; supported by full-length cDNA: Ceres: 268536.	---	heat shock protein, putative	---	AGI:At5g51440	---	---	---	HSP20 // Hsp20/alpha crystallin family;3.1e-18	---	d1gmea_ // b.15.1.1 // Small heat shock protein;6.37e-27	---	---	15242086 // mitochondrial heat shock 22 kd protein-like protein id: At5g51440.1, supported by cDNA: 268536. [Arabidopsis thaliana];e-115 /// 21554988 // mitochondrial heat shock 22 kd protein-like [Arabidopsis thaliana];e-113	protein_coding	HSP20-like chaperones superfamily protein		HSP20-like chaperones superfamily protein; CONTAINS InterPro DOMAIN/s: Heat shock protein Hsp20 (InterPro:IPR002068), HSP20-like chaperone (InterPro:IPR008978); BEST Arabidopsis thaliana protein match is: mitochondrion-localized small heat shock protein 23.6 (TAIR:AT4G25200.1); Has 3995 Blast hits to 3995 proteins in 1037 species: Archae - 138; Bacteria - 2214; Metazoa - 5; Fungi - 114; Plants - …
AT4G19030	254606_at	0.677539	1.21921e-05	0.00100918	0.00136796	0.00655483	0.14581	0.0623912	0.000104302	63.6122	2.41774	Arabidopsis thaliana	Exemplar	'nodulin-26 - like protein major intrinsic protein, Oryza sativa, PIR2:S52003;supported by full-length cDNA: Ceres:109513.'	---	major intrinsic protein (MIP) family	---	AGI:At4g19030	---	---	5215 // transporter activity // extended:inferred from electronic annotation; MIP; 7.7e-80	MIP // Major intrinsic protein;7.7e-80	IPB000425 // MIP family;5.2e-61	d1h6ia_ // f.2.1.5 // Aquaporin-1;9.59e-62	numtm:6;Nin-prob:0.24845;Type:;Span:TM from 57 to 79: Eval:0.42162/TM from 89 to 111: Eval:0.58680/TM from 132 to 154: Eval:0.60482/TM from 178 to 200: Eval:0.32924/TM from 207 to 229: Eval:0.45741/TM from 249 to 271: Eval:0.39446	---	25324917 // nodulin-26-like protein [imported] - Arabidopsis thaliana;e-163 /// 18415224 // nodulin-26 - like protein protein id: At4g19030.1, supported by cDNA: 109513., supported by cDNA: gi_17380643 [Arabidopsis thaliana];e-166	protein_coding	NOD26-like major intrinsic protein 1	an aquaporin whose expression level is reduced by ABA, NaCl, dark, and dessication. is expressed at relatively low levels under normal conditions. Also functions in arsenite transport and tolerance.	NOD26-like major intrinsic protein 1 (NLM1); CONTAINS InterPro DOMAIN/s: Major intrinsic protein, conserved site (InterPro:IPR022357), Aquaporin (InterPro:IPR012269), Major intrinsic protein (InterPro:IPR000425); BEST Arabidopsis thaliana protein match is: NOD26-like intrinsic protein 1;2 (TAIR:AT4G18910.1); Has 30201 Blast hits to 17322 proteins in 780 species: Archae - 12; Bacteria - 1396; Meta…
AT5G48000	248728_at	0.60975	2.18615e-09	0.453742	2.8593e-06	0.13947	0.860258	0.108458	0.00352203	63.4519	3.11763	Arabidopsis thaliana	Exemplar	cytochrome P450-like protein	---	cytochrome p450 family	---	AGI:At5g48000	6118 // electron transport // extended:inferred from electronic annotation; p450; 2.3e-37	---	---	p450 // Cytochrome P450;2.3e-37	IPB001128 // none;0.00066	d1io7a_ // a.104.1.1 // CYP119;8.98e-75	numtm:1;Nin-prob:0.9714;Type:;Span:TM from 43 to 65: Eval:0.48376	---	15238867 // cytochrome p450 family protein id: At5g48000.1 [Arabidopsis thaliana];0.0 /// 22530982 // cytochrome P450-like protein [Arabidopsis thaliana];0.0	protein_coding	cytochrome P450, family 708, subfamily A, polypeptide 2	Encodes a member of the CYP708A family of cytochrome P450 enzymes. THAH appears to add a hydroxyl group to the triterpene thalianol. thah1 mutants have an elevated accumulation of thalianol. thah1-1 mutants have longer roots than wild type plants. Thalian-diol and desaturated thalian-diol are lost from the root extracts of thah1-1 mutants. Overexpression of the sequence from At5g48000.1 rescues t…	cytochrome P450, family 708, subfamily A, polypeptide 2 (CYP708A2); FUNCTIONS IN: thalianol hydroxylase activity, oxygen binding; INVOLVED IN: thalianol metabolic process, root development; LOCATED IN: endoplasmic reticulum; EXPRESSED IN: hypocotyl, root, callus; CONTAINS InterPro DOMAIN/s: Cytochrome P450 (InterPro:IPR001128), Cytochrome P450, E-class, group IV (InterPro:IPR002403), Cytochrome P…
AT5G19590	245957_at	2.2456e-15	0.00283216	0.449944	0.206198	0.869464	0.41388	0.61371	0.618884	63.4269	2.38798	Arabidopsis thaliana	Exemplar	putative protein predicted proteins - Arabidopsis thaliana	---	expressed protein	---	AGI:At5g19590	---	---	---	---	---	---	---	---	20521311 // B1103C09.15 [Oryza sativa (japonica cultivar-group)];2e-31 /// 15241137 // putative protein protein id: At5g19590.1 [Arabidopsis thaliana];1e-81	protein_coding	Protein of unknown function, DUF538		Protein of unknown function, DUF538; FUNCTIONS IN: molecular_function unknown; INVOLVED IN: biological_process unknown; LOCATED IN: endomembrane system; EXPRESSED IN: 22 plant structures; EXPRESSED DURING: 13 growth stages; CONTAINS InterPro DOMAIN/s: Protein of unknown function DUF538 (InterPro:IPR007493); BEST Arabidopsis thaliana protein match is: Protein of unknown function, DUF538 (TAIR:AT4G…
AT2G34610	266900_at	0.479199	5.56558e-08	0.000700352	0.00175543	0.00613833	0.243873	0.371544	0.00472847	63.3303	2.15388	Arabidopsis thaliana	Exemplar	hypothetical protein predicted by genscan	---	expressed protein	---	AGI:At2g34610	---	---	---	---	---	---	numtm:2;Nin-prob:0.45175;Type:;Span:TM from 25 to 44: Eval:0.97501/TM from 59 to 78: Eval:0.78974	---	22326124 // hypothetical protein protein id: At2g34610.1, supported by cDNA: gi_17979356 [Arabidopsis thaliana];e-163 /// 25372862 // hypothetical protein At2g34610 [imported] - Arabidopsis thaliana;e-162	protein_coding			unknown protein; BEST Arabidopsis thaliana protein match is: unknown protein (TAIR:AT1G30190.1); Has 342 Blast hits to 279 proteins in 74 species: Archae - 0; Bacteria - 7; Metazoa - 76; Fungi - 18; Plants - 51; Viruses - 0; Other Eukaryotes - 190 (source: NCBI BLink).
AT3G05770	258739_s_at	0.919098	3.96421e-05	1.62245e-07	0.00769241	0.10683	0.808016	0.164095	0.000205868	62.7095	2.49288	Arabidopsis thaliana	Exemplar	unknown protein similar to hypothetical protein GB:AAD25610	At3g05770:At1g54300 (2 transcripts, 2 gene clusters)	hypothetical protein	---	AGI:At3g05770	---	---	---	---	---	---	---	---	25405713 // hypothetical protein F20D21.12 [imported] - Arabidopsis thaliana;e-171 /// 15230043 // unknown protein protein id: At3g05770.1 [Arabidopsis thaliana];0.0	protein_coding			unknown protein; BEST Arabidopsis thaliana protein match is: unknown protein (TAIR:AT1G54300.1); Has 105 Blast hits to 105 proteins in 16 species: Archae - 0; Bacteria - 0; Metazoa - 0; Fungi - 0; Plants - 99; Viruses - 0; Other Eukaryotes - 6 (source: NCBI BLink).
AT5G26260	246825_at	0.314347	4.77257e-05	0.162442	1.27268e-07	0.00106361	0.888243	0.482742	0.00115081	62.4137	5.07798	Arabidopsis thaliana	Exemplar	'putative protein various predicted proteins, Arabidopsis thaliana; supported by cDNA: gi_15293178_gb_AY051023.1_ '	---	expressed protein	---	AGI:At5g26260	---	---	---	MATH // MATH domain;2.2e-23	---	---	---	---	18421006 // putative protein protein id: At5g26260.1, supported by cDNA: gi_13877740, supported by cDNA: gi_15293178 [Arabidopsis thaliana];0.0 /// 21537388 // unknown [Arabidopsis thaliana];e-170	protein_coding	TRAF-like family protein		TRAF-like family protein; FUNCTIONS IN: molecular_function unknown; INVOLVED IN: biological_process unknown; LOCATED IN: chloroplast; EXPRESSED IN: hypocotyl, root, callus; CONTAINS InterPro DOMAIN/s: TRAF-like (InterPro:IPR008974), MATH (InterPro:IPR002083); BEST Arabidopsis thaliana protein match is: TRAF-like family protein (TAIR:AT5G26280.1); Has 30201 Blast hits to 17322 proteins in 780 spec…
AT2G15970	265480_at	8.98432e-15	0.897723	0.00229884	0.245302	0.598895	0.824529	0.677506	0.416349	60.4532	2.67921	Arabidopsis thaliana	Exemplar	similar to cold acclimation protein WCOR413 [Triticum aestivum] ;supported by full-length cDNA: Ceres:7835.	---	cold acclimation protein WCOR413 (Triticum aestivum) -related	---	AGI:At2g15970	---	---	---	---	---	---	numtm:5;Nin-prob:0.25829;Type:;Span:TM from 40 to 62: Eval:0.63772/TM from 75 to 97: Eval:0.42119/TM from 117 to 136: Eval:0.95908/TM from 143 to 162: Eval:0.66044/TM from 177 to 196: Eval:0.76445	---	27902673 // cold acclimation protein COR413-PM1 [Zea mays];3e-66 /// 15226654 // similar to cold acclimation protein WCOR413 (Triticum aestivum) protein id: At2g15970.1, supported by cDNA: 7835., supported by cDNA: gi_10121840, supported by cDNA: gi_11127594, supported by cDNA: gi_20147352 [Arabidopsis thaliana];e-109	protein_coding	cold regulated 413 plasma membrane 1	encodes an alpha form of a protein similar to the cold acclimation protein WCOR413 in wheat. Expression is induced by short-term cold-treatment, water deprivation, and abscisic acid treatment.	cold regulated 413 plasma membrane 1 (COR413-PM1); FUNCTIONS IN: molecular_function unknown; INVOLVED IN: cold acclimation, cellular response to water deprivation, response to abscisic acid stimulus; LOCATED IN: plasma membrane, vacuole; EXPRESSED IN: 22 plant structures; EXPRESSED DURING: 13 growth stages; CONTAINS InterPro DOMAIN/s: Cold acclimation WCOR413 (InterPro:IPR008892); BEST Arabidopsi…
AT5G62210	247463_at	3.23776e-11	0.000596996	0.0124751	0.722057	0.655401	0.0504798	0.450063	0.905859	58.563	2.04454	Arabidopsis thaliana	Exemplar	'embryo-specific protein - like embryo-specific protein 3, Arabidopsis thaliana, PIR:T48490; supported by full-length cDNA: Ceres: 28168. '	---	embryo-specific protein - like	---	AGI:At5g62210	---	---	---	---	PR00049 // Wilm's tumour protein signature;0.0043	---	---	---	15241758 // embryo-specific protein - like protein id: At5g62210.1, supported by cDNA: 28168. [Arabidopsis thaliana];e-132 /// 26450767 // embryo-specific protein like [Arabidopsis thaliana];e-132	protein_coding	Embryo-specific protein 3, (ATS3)		Embryo-specific protein 3, (ATS3); CONTAINS InterPro DOMAIN/s: Lipase/lipooxygenase, PLAT/LH2 (InterPro:IPR008976), Embryo-specific 3 (InterPro:IPR010417); BEST Arabidopsis thaliana protein match is: seed gene 3 (TAIR:AT5G07190.1); Has 13635 Blast hits to 5538 proteins in 466 species: Archae - 12; Bacteria - 1109; Metazoa - 3835; Fungi - 1100; Plants - 4139; Viruses - 1069; Other Eukaryotes - 237…
AT2G35980	263948_at	0.451345	0.00820977	0.683604	5.63579e-06	0.00191495	0.659742	0.731717	3.76286e-07	57.4827	2.1251	Arabidopsis thaliana	Exemplar	similar to harpin-induced protein hin1 from tobacco ;supported by full-length cDNA: Ceres:26418.	---	harpin-induced protein 1 family (HIN1)	---	AGI:At2g35980	---	---	---	---	---	---	numtm:0;Nin-prob:0.55688;Type:SIGNAL;Span:	---	7417006 // harpin inducing protein [Nicotiana tabacum];2e-60 /// 15227542 // similar to harpin-induced protein hin1 from tobacco protein id: At2g35980.1, supported by cDNA: 26418., supported by cDNA: gi_13122295 [Arabidopsis thaliana];e-130	protein_coding	Late embryogenesis abundant (LEA) hydroxyproline-rich glycoprotein family	Encodes a protein whose sequence is similar to tobacco hairpin-induced gene (HIN1) and Arabidopsis non-race specific disease resistance gene (NDR1). Expression of this gene is induced by cucumber mosaic virus, spermine and during senescence. The gene product is localized to the chloroplast.	YELLOW-LEAF-SPECIFIC GENE 9 (YLS9); FUNCTIONS IN: molecular_function unknown; INVOLVED IN: defense response to virus, leaf senescence, response to other organism; LOCATED IN: chloroplast; EXPRESSED IN: 7 plant structures; EXPRESSED DURING: 4 anthesis, 4 leaf senescence stage, petal differentiation and expansion stage; CONTAINS InterPro DOMAIN/s: Late embryogenesis abundant protein, group 2 (Inter…
AT4G35150	253177_s_at	0.0942685	2.67104e-05	0.000544101	0.00657626	0.127483	0.0331527	0.428773	0.000361536	57.2333	2.04819	Arabidopsis thaliana	Exemplar	'O-methyltransferase - like protein caffeic acid O-methyltransferase, Pinus taeda, gb:U39301'	At4g35150:At4g35160 (2 transcripts, 2 gene clusters)	O-methyltransferase family 2	---	AGI:At4g35150	---	---	8171 // O-methyltransferase activity // extended:inferred from electronic annotation; Methyltransf_2; 1.6e-52	Methyltransf_2 // O-methyltransferase;1.6e-52	---	d1fp2a1 // a.4.5.29 // Isoflavone O-methyltransferase;1.99e-22 /// d1fp2a2 // c.66.1.12 // Isoflavone O-methyltransferase;6.31e-67	---	EC:2.1.1.129 // IMT1_MESCR MYO-INOSITOL 4-O-METHYLTRANSFERASE (EC 2.1.1.129).;5.09e-89	15236280 // O-methyltransferase, family 2 family protein id: At4g35150.1 [Arabidopsis thaliana];0.0 /// 15236282 // O-methyltransferase, family 2 family protein id: At4g35160.1, supported by cDNA: gi_20466673 [Arabidopsis thaliana];e-161	protein_coding	O-methyltransferase family protein		O-methyltransferase family protein; FUNCTIONS IN: methyltransferase activity, O-methyltransferase activity, protein dimerization activity; LOCATED IN: cytosol; CONTAINS InterPro DOMAIN/s: Plant methyltransferase dimerisation (InterPro:IPR012967), O-methyltransferase, family 2 (InterPro:IPR001077), O-methyltransferase, COMT, eukaryota (InterPro:IPR016461); BEST Arabidopsis thaliana protein match i…
AT1G03820	265083_at	6.37841e-08	0.26994	0.0840949	2.74612e-05	0.0292144	0.21145	0.434733	0.0553154	57.2324	2.43854	Arabidopsis thaliana	Exemplar	hypothetical protein predicted by genefinder	---	expressed protein	---	AGI:At1g03820	---	---	---	---	---	---	---	---	15219564 // hypothetical protein protein id: At1g03820.1 [Arabidopsis thaliana];e-131 /// 1087015 // arabinogalactan-protein AGP [Pyrus communis];9e-14	protein_coding			unknown protein; FUNCTIONS IN: molecular_function unknown; INVOLVED IN: biological_process unknown; LOCATED IN: endomembrane system; EXPRESSED IN: 21 plant structures; EXPRESSED DURING: 13 growth stages; Has 1345 Blast hits to 1122 proteins in 102 species: Archae - 2; Bacteria - 28; Metazoa - 28; Fungi - 30; Plants - 109; Viruses - 0; Other Eukaryotes - 1148 (source: NCBI BLink).
AT1G72140	259846_at	0.822255	3.25469e-08	0.0293617	0.000274072	0.0387258	0.119292	0.624842	0.00981879	57.185	2.33069	Arabidopsis thaliana	Exemplar	'peptide transporter PTR2-B, putative similar to SP:P46032 from [Arabidopsis thaliana]'	---	peptide transporter PTR2-B -related	---	AGI:At1g72140	---	---	5215 // transporter activity // extended:inferred from electronic annotation; PTR2; 1.4e-83	PTR2 // POT family;1.4e-83	IPB000109 // PTR peptide transporters (PTR2);6.3e-67	---	numtm:12;Nin-prob:0.67052;Type:;Span:TM from 53 to 71: Eval:0.37599/TM from 81 to 103: Eval:0.30896/TM from 110 to 132: Eval:0.46454/TM from 147 to 169: Eval:0.62251/TM from 190 to 209: Eval:0.91887/TM from 219 to 241: Eval:0.70298/TM from 316 to 335: Eval:0.72448/TM from 355 to 377: Eval:0.64990/TM from 398 to 417: Eval:0.94659/TM from 437 to 459: Eval:0.94339/TM from 480 to 502: Eval:0.83373/TM…	---	15218381 // peptide transporter PTR2-B, putative protein id: At1g72140.1 [Arabidopsis thaliana];0.0 /// 15219903 // oligopeptide transporter, putative protein id: At1g22540.1 [Arabidopsis thaliana];0.0	protein_coding	Major facilitator superfamily protein		Major facilitator superfamily protein; FUNCTIONS IN: transporter activity; INVOLVED IN: oligopeptide transport, response to nematode; LOCATED IN: plasma membrane, membrane; EXPRESSED IN: 18 plant structures; EXPRESSED DURING: 8 growth stages; CONTAINS InterPro DOMAIN/s: Oligopeptide transporter (InterPro:IPR000109), Major facilitator superfamily, general substrate transporter (InterPro:IPR016196)…
AT4G29700	253697_at	0.12399	2.5434e-05	7.88875e-05	0.0243731	0.00211149	0.768362	0.646635	0.00107036	57.0273	2.05006	Arabidopsis thaliana	Exemplar	'nucleotide pyrophosphatase -like protein nucleotide pyrophosphatase, Oryza sativa, gb:T03293; supported by cDNA: gi_13430713_gb_AF360269.1_AF360269 '	---	nucleotide pyrophosphatase -related protein	---	AGI:At4g29700	---	---	16787 // hydrolase activity // extended:Unknown; Phosphodiest; 1.7e-110	Phosphodiest // Type I phosphodiesterase / nucleotide py;1.7e-110	IPB000917 // Sulfatase;0.00054	d1hdha_ // c.76.1.2 // Arylsulfatase B (4-sulfatase);8.9e-13	numtm:0;Nin-prob:0.99825;Type:SIGNAL;Span:	EC:3.1.6.14 // GL6S_HUMAN N-ACETYLGLUCOSAMINE-6-SULFATASE PRECURSOR (EC 3.1.6.14) (G6S) (GLUCOSAMINE-6-SULFATASE).;2.81e-18 /// EC:3.6.1.9 // PC1_HUMAN PLASMA-CELL MEMBRANE GLYCOPROTEIN PC-1 [INCLUDES: ALKALINE PHOSPHODIESTERASE I (EC 3.1.4.1) NUCLEOTIDE PYROPHOSPHATASE (EC 3.6.1.9) (NPPASE)].;9.96e-143	15233662 // nucleotide pyrophosphatase - like protein protein id: At4g29690.1 [Arabidopsis thaliana];0.0 /// 15233665 // nucleotide pyrophosphatase -like protein protein id: At4g29700.1, supported by cDNA: gi_13430713 [Arabidopsis thaliana];0.0	protein_coding	Alkaline-phosphatase-like family protein		Alkaline-phosphatase-like family protein; FUNCTIONS IN: hydrolase activity, catalytic activity; INVOLVED IN: metabolic process, nucleotide metabolic process; LOCATED IN: vacuole; EXPRESSED IN: 21 plant structures; EXPRESSED DURING: 12 growth stages; CONTAINS InterPro DOMAIN/s: Alkaline phosphatase-like, alpha/beta/alpha (InterPro:IPR017849), Type I phosphodiesterase/nucleotide pyrophosphatase/pho…
AT5G52640	248332_at	0.000178489	6.10387e-11	0.156642	0.15086	0.343281	0.235342	0.820276	0.6789	56.2608	2.00429	Arabidopsis thaliana	Exemplar	heat-shock protein ; supported by cDNA: gi_166769_gb_M62984.1_ATHHSP83	---	heat shock protein 81-1 (HSP81-1/heat shock protein 83/HSP83)	---	AGI:At5g52640	---	---	5524 // ATP binding activity // extended:Unknown; HATPase_c; 3.4e-15	HSP90 // Hsp90 protein;0 /// HATPase_c // Histidine kinase-, DNA gyrase B-, and HSP90;3.4e-15	IPB001404 // Heat shock hsp90 proteins family;0	d1byqa_ // d.122.1.1 // HSP90;1.81e-93	---	---	445126 // ;0.0 /// 15237214 // heat-shock protein protein id: At5g52640.1, supported by cDNA: gi_166769 [Arabidopsis thaliana];0.0	protein_coding	heat shock protein 90.1	Encodes a cytosolic heat shock protein AtHSP90.1. AtHSP90.1 interacts with disease resistance signaling components SGT1b and RAR1 and is required for RPS2-mediated resistance.	heat shock protein 90.1 (HSP90.1); FUNCTIONS IN: unfolded protein binding, ATP binding; INVOLVED IN: defense response to bacterium, response to heat, response to arsenic; LOCATED IN: cytosol, cell wall, plasma membrane; EXPRESSED IN: 25 plant structures; EXPRESSED DURING: 14 growth stages; CONTAINS InterPro DOMAIN/s: Chaperone protein htpG (InterPro:IPR001404), Heat shock protein Hsp90, conserved…
AT5G26220	246884_at	0.000344546	0.318928	0.000114468	0.000255793	0.00463961	0.346523	0.746891	0.00655164	55.1329	2.40575	Arabidopsis thaliana	Exemplar	'putative protein cation transport protein chaC, Escherichia coli, PIR:G64868'	---	expressed protein	---	AGI:At5g26220	---	---	---	---	---	---	---	---	7486723 // hypothetical protein F9D12.14 - Arabidopsis thaliana;e-109 /// 15239626 // putative protein protein id: At5g26220.1 [Arabidopsis thaliana];e-124	protein_coding	ChaC-like family protein		ChaC-like family protein; CONTAINS InterPro DOMAIN/s: ChaC-like protein (InterPro:IPR006840); BEST Arabidopsis thaliana protein match is: ChaC-like family protein (TAIR:AT4G31290.1); Has 1807 Blast hits to 1807 proteins in 277 species: Archae - 0; Bacteria - 0; Metazoa - 736; Fungi - 347; Plants - 385; Viruses - 0; Other Eukaryotes - 339 (source: NCBI BLink).
AT3G48360	252367_at	0.000979658	2.30803e-05	0.207483	9.21855e-06	0.118219	0.985445	0.0993787	0.0590394	54.9091	2.36224	Arabidopsis thaliana	Exemplar	'putative protein MEL-26, Caenorhabditis elegans, U67737; supported by cDNA: gi_14532781_gb_AY040015.1_ '	---	expressed protein	---	AGI:At3g48360	---	---	5515 // protein binding activity // extended:inferred from electronic annotation; BTB; 4.9e-07	BTB // BTB/POZ domain;4.9e-07	---	d1f81a_ // g.53.1.1 // CREB-binding transcriptional adaptor protein CBP (p300);2.37e-25	---	---	7487530 // hypothetical protein T29H11.120 - Arabidopsis thaliana;0.0 /// 18408618 // putative protein protein id: At3g48360.1, supported by cDNA: gi_14532781, supported by cDNA: gi_19310816 [Arabidopsis thaliana];0.0	protein_coding	BTB and TAZ domain protein 2	encodes a protein (BT2) that is an essential component of the TAC1-mediated telomerase activation pathway. Acts redundantly with BT3 and BT1 during female gametophyte development and with BT3 during male gametophyte development. BT2 also mediates multiple responses to nutrients, stresses, and hormones.	BTB and TAZ domain protein 2 (BT2); CONTAINS InterPro DOMAIN/s: BTB/POZ (InterPro:IPR013069), Zinc finger, TAZ-type (InterPro:IPR000197), BTB/POZ fold (InterPro:IPR011333), Kelch related (InterPro:IPR013089), BTB/POZ-like (InterPro:IPR000210); BEST Arabidopsis thaliana protein match is: BTB and TAZ domain protein 1 (TAIR:AT5G63160.1); Has 1199 Blast hits to 1199 proteins in 89 species: Archae - 0…
AT2G20260	265287_at	2.19973e-11	0.0100878	0.00230642	0.713984	0.650874	0.932834	0.367215	0.376895	54.8542	2.06858	Arabidopsis thaliana	Exemplar	putative photosystem I reaction center subunit IV ;supported by full-length cDNA: Ceres:27629.	---	photosystem I reaction center subunit IV -related	---	AGI:At2g20260	6118 // electron transport // extended:inferred from electronic annotation; PSI_PsaE; 9.4e-29	---	---	PSI_PsaE // Photosystem I reaction centre subunit IV / P;9.4e-29	IPB003375 // Photosystem I reaction centre subunit IV / PsaE;1.7e-46	d1jb0e_ // b.34.4.2 // Photosystem I accessory protein E (PsaE);3.42e-24	---	---	15225331 // putative photosystem I reaction center subunit IV protein id: At2g20260.1, supported by cDNA: 27629., supported by cDNA: gi_14596070 [Arabidopsis thaliana];4e-76 /// 21555308 // Photosystem I reaction center subunit IV B, chloroplast precursor (PSI-E B) [Arabidopsis thaliana];4e-75	protein_coding	photosystem I subunit E-2	Encodes subunit E of photosystem I.	photosystem I subunit E-2 (PSAE-2); FUNCTIONS IN: catalytic activity; INVOLVED IN: photosynthesis; LOCATED IN: thylakoid, chloroplast thylakoid membrane, chloroplast, plastoglobule, photosystem I reaction center; EXPRESSED IN: 25 plant structures; EXPRESSED DURING: 13 growth stages; CONTAINS InterPro DOMAIN/s: Photosystem I reaction centre subunit IV/PsaE (InterPro:IPR003375), Electron transport …
AT1G14960	262838_at	0.894598	5.9779e-08	0.35838	0.00123929	0.177592	0.50526	0.348467	9.66038e-05	53.6299	2.33342	Arabidopsis thaliana	Exemplar	'major latex protein, putative similar to major latex-like protein GB:CAA11844 GI:3164115 [Rubus idaeus];supported by full-length cDNA: Ceres:3858.'	---	major latex protein (MLP)-related	---	AGI:At1g14960	---	---	---	Bet_v_I // Pathogenesis-related protein Bet v I family;8.8e-77	---	d1icxa_ // d.129.3.1 // Plant pathogenesis-related protein PR10;1.62e-14	---	---	15223958 // major latex protein (MLP)-related protein id: At1g14960.1, supported by cDNA: 3858., supported by cDNA: gi_14596068, supported by cDNA: gi_18377571 [Arabidopsis thaliana];5e-88 /// 8778221 // F10B6.35 [Arabidopsis thaliana];4e-76	protein_coding	Polyketide cyclase/dehydrase and lipid transport superfamily protein		Polyketide cyclase/dehydrase and lipid transport superfamily protein; FUNCTIONS IN: molecular_function unknown; INVOLVED IN: response to biotic stimulus, defense response; LOCATED IN: cellular_component unknown; EXPRESSED IN: root; CONTAINS InterPro DOMAIN/s: Bet v I allergen (InterPro:IPR000916); BEST Arabidopsis thaliana protein match is: Polyketide cyclase/dehydrase and lipid transport superfa…
AT1G66800	256368_at	0.85275	1.70017e-08	0.0807557	0.00100476	0.0218214	0.919884	0.104094	0.0326945	53.4662	2.32443	Arabidopsis thaliana	Exemplar	'cinnamyl alcohol dehydrogenase, putative similar to cinnamyl alcohol dehydrogenase [Eucalyptus gunnii] GI:1143445'	---	cinnamyl-alcohol dehydrogenase (CAD) family	---	AGI:At1g66800	---	---	---	---	IPB001509 // NAD dependent epimerase/dehydratase family;1.2e-05	d1e6ua_ // c.2.1.2 // GDP-4-keto-6-deoxy-d-mannose epimerase/reductase (GDP-fucose synthetase);6.59e-33	---	EC:5.1.3.12 // LPSL_RHIME UDP-GLUCURONATE 5-EPIMERASE (EC 5.1.3.12) (UDP-GLUCURONIC ACID EPIMERASE).;1.82e-35 /// EC:4.2.1.45 // RFBG_SALTY CDP-GLUCOSE 4,6-DEHYDRATASE (EC 4.2.1.45).;5.58e-55	15219749 // cinnamyl alcohol dehydrogenase, putative protein id: At1g66800.1 [Arabidopsis thaliana];e-174 /// 15217529 // putative cinnamyl alcohol dehydrogenase protein id: At1g09490.1, supported by cDNA: 32366., supported by cDNA: gi_19699323 [Arabidopsis thaliana];e-115	protein_coding	NAD(P)-binding Rossmann-fold superfamily protein	similar to Eucalyptus gunnii alcohol dehydrogenase of unknown physiological function (GI:1143445), apple tree, PIR:T16995; NOT a cinnamyl-alcohol dehydrogenase	NAD(P)-binding Rossmann-fold superfamily protein; FUNCTIONS IN: alcohol dehydrogenase (NAD) activity, cinnamyl-alcohol dehydrogenase activity; INVOLVED IN: lignin biosynthetic process, cellular metabolic process, metabolic process; LOCATED IN: cellular_component unknown; EXPRESSED IN: sperm cell, hypocotyl, root, pollen tube; CONTAINS InterPro DOMAIN/s: NAD-dependent epimerase/dehydratase (InterP…
AT3G12580	256245_at	0.0109575	8.59584e-13	0.928308	0.474041	0.113213	0.394077	0.751679	0.716363	53.157	2.0785	Arabidopsis thaliana	Exemplar	heat shock protein 70 identical to heat shock protein 70 GB:CAA05547 GI:3962377 [Arabidopsis thaliana]; supported by cDNA: gi_15809831_gb_AY054183.1_	---	heat shock protein hsp70	---	AGI:At3g12580	---	---	---	HSP70 // Hsp70 protein;0	IPB002821 // Hydantoinase/oxoprolinase;6.6e-22	d1bupa1 // c.55.1.1 // Heat shock protein 70kDa, ATPase fragment;6.15e-78 /// d1ckra_ // e.20.1.1 // DnaK;4.19e-70	---	---	3962377 // heat shock protein 70 [Arabidopsis thaliana];0.0 /// 15230534 // heat shock protein 70 protein id: At3g12580.1 [Arabidopsis thaliana];0.0	protein_coding	heat shock protein 70		heat shock protein 70 (HSP70); FUNCTIONS IN: ATP binding; INVOLVED IN: in 9 processes; LOCATED IN: cytosol, mitochondrion, cell wall, plasma membrane; EXPRESSED IN: 23 plant structures; EXPRESSED DURING: 11 growth stages; CONTAINS InterPro DOMAIN/s: Heat shock protein 70, conserved site (InterPro:IPR018181), Heat shock protein Hsp70 (InterPro:IPR001023), Heat shock protein 70 (InterPro:IPR013126)…
AT5G42590	249203_at	0.404407	5.68382e-09	0.151772	0.0865489	0.0307522	0.242973	0.486911	0.00141311	52.5164	2.36426	Arabidopsis thaliana	Exemplar	cytochrome P450	---	cytochrome P450 71A16	---	AGI:At5g42590	6118 // electron transport // extended:inferred from electronic annotation; p450; 6e-89	---	---	p450 // Cytochrome P450;6e-89	IPB001128 // none;4.5e-06	d1dt6a_ // a.104.1.1 // Mammalian cytochrome p450 2c5;1.39e-117	numtm:0;Nin-prob:0.67787;Type:SIGNAL;Span:	EC:1.14.13.11 // TCMO_ZINEL TRANS-CINNAMATE 4-MONOOXYGENASE (EC 1.14.13.11) (CINNAMIC ACID 4-HYDROXYLASE) (CA4H) (C4H) (P450C4H) (CYTOCHROME P450 73).;1.06e-132 /// EC:1.1.3.34 // CP80_BERST BERBAMUNINE SYNTHASE (EC 1.1.3.34) (CYTOCHROME P450 80) (CYPLXXX) ((S)-N-METHYLCOCLAURINE OXIDASE [C-O PHENOL-COUPLING]).;5.06e-126 /// EC:4.2.1.92 // CP74_LINUS ALLENE OXIDE SYNTHASE PRECURSOR (EC 4.2.1.92) …	15238664 // cytochrome P450-like protein protein id: At5g24960.1 [Arabidopsis thaliana];e-179 /// 15239008 // cytochrome p450, putative protein id: At5g42590.1 [Arabidopsis thaliana];0.0	protein_coding	cytochrome P450, family 71, subfamily A, polypeptide 16	putative cytochrome P450	cytochrome P450, family 71, subfamily A, polypeptide 16 (CYP71A16); FUNCTIONS IN: electron carrier activity, monooxygenase activity, iron ion binding, oxygen binding, heme binding; INVOLVED IN: oxidation reduction; LOCATED IN: chloroplast; EXPRESSED IN: root, cultured cell; CONTAINS InterPro DOMAIN/s: Cytochrome P450 (InterPro:IPR001128), Cytochrome P450, conserved site (InterPro:IPR017972), Cyto…
AT5G59080	247754_at	0.0122095	7.63788e-06	0.67364	1.6152e-08	0.810143	0.698248	0.647024	0.829413	51.5278	2.14248	Arabidopsis thaliana	Exemplar	putative protein	---	expressed protein	---	AGI:At5g59080	---	---	---	---	---	---	---	---	15241665 // putative protein protein id: At5g02020.1, supported by cDNA: gi_16648747, supported by cDNA: gi_20334905 [Arabidopsis thaliana];3e-23 /// 15237814 // putative protein protein id: At5g59080.1, supported by cDNA: gi_17380959, supported by cDNA: gi_20465392 [Arabidopsis thaliana];1e-75	protein_coding			unknown protein; FUNCTIONS IN: molecular_function unknown; INVOLVED IN: response to oxidative stress; LOCATED IN: chloroplast; EXPRESSED IN: 18 plant structures; EXPRESSED DURING: 9 growth stages; BEST Arabidopsis thaliana protein match is: unknown protein (TAIR:AT3G46880.1); Has 1807 Blast hits to 1807 proteins in 277 species: Archae - 0; Bacteria - 0; Metazoa - 736; Fungi - 347; Plants - 385; V…
AT4G11210	254909_at	0.813299	1.35313e-05	0.132534	0.199668	0.000904203	0.493142	0.029893	0.000142969	50.6784	2.1833	Arabidopsis thaliana	Exemplar	'putative disease resistance response protein disease resistance response protein 206-d - Pisum sativum, PID:g508844'	---	disease resistance response protein family/ dirigent protein family	---	AGI:At4g11210	9621 // response to pathogenic fungi // extended:inferred from electronic annotation; disease_resp; 2.1e-81	---	---	disease_resp // Plant disease resistance response protei;2.1e-81	---	---	---	---	15237092 // disease resistance response protein family/ dirigent protein family protein id: At4g11210.1 [Arabidopsis thaliana];e-106 /// 15237088 // disease resistance response protein family/ dirigent protein family protein id: At4g11190.1 [Arabidopsis thaliana];6e-82	protein_coding	Disease resistance-responsive (dirigent-like protein) family protein		Disease resistance-responsive (dirigent-like protein) family protein; FUNCTIONS IN: molecular_function unknown; INVOLVED IN: lignan biosynthetic process, defense response; LOCATED IN: endomembrane system; EXPRESSED IN: leaf lamina base, petal, hypocotyl, cauline leaf, root; EXPRESSED DURING: 4 anthesis; CONTAINS InterPro DOMAIN/s: Plant disease resistance response protein (InterPro:IPR004265); BE…
AT4G34290	253233_at	5.06625e-12	0.0148611	0.367348	0.580308	0.62048	0.296077	0.616457	0.452862	50.1097	3.2546	Arabidopsis thaliana	Exemplar	putative protein various predicted proteins; supported by full-length cDNA: Ceres: 17912.	---	expressed protein	---	AGI:At4g34290	---	---	---	SWIB // BAF60b domain of the SWIB complex;9.2e-38	IPB003121 // BAF60b domain of the SWIB complex;3.2e-19	---	---	---	15235320 // putative protein protein id: At4g34290.1, supported by cDNA: 17912., supported by cDNA: gi_14423525 [Arabidopsis thaliana];2e-77 /// 14423526 // putative protein [Arabidopsis thaliana];4e-77	protein_coding	SWIB/MDM2 domain superfamily protein		SWIB/MDM2 domain superfamily protein; FUNCTIONS IN: molecular_function unknown; INVOLVED IN: biological_process unknown; LOCATED IN: chloroplast; EXPRESSED IN: 21 plant structures; EXPRESSED DURING: 13 growth stages; CONTAINS InterPro DOMAIN/s: SWIB/MDM2 domain (InterPro:IPR003121), SWIB domain (InterPro:IPR019835); BEST Arabidopsis thaliana protein match is: SWIB/MDM2 domain superfamily protein …
AT3G05020	259095_at	1.67335e-11	0.0480178	0.727	0.0209975	0.796986	0.953621	0.174562	0.545129	50.0018	2.08362	Arabidopsis thaliana	Exemplar	acyl carrier protein 1 precursor (ACP) identical to GB:P11829 [Arabidopsis thaliana]; supported by full-length cDNA: Ceres: 14291.	---	acyl carrier protein 1 (ACP), chloroplast	ACP-1	AGI:At3g05020	---	---	---	pp-binding // Phosphopantetheine attachment site;3.7e-18	IPB003880 // Phosphopantetheine attachment site;3.5e-05	d1acp__ // a.28.1.1 // Acyl carrier protein;3.86e-17	---	---	15229875 // acyl carrier protein 1 precursor (ACP) protein id: At3g05020.1, supported by cDNA: 14291. [Arabidopsis thaliana];1e-68 /// 445115 // ;5e-67	protein_coding	acyl carrier protein 1	encodes an acyl carrier protein expressed in leaves, roots, and dry seeds. Protein is not regulated by light.	acyl carrier protein 1 (ACP1); FUNCTIONS IN: acyl carrier activity; INVOLVED IN: fatty acid biosynthetic process; LOCATED IN: chloroplast; EXPRESSED IN: 23 plant structures; EXPRESSED DURING: 14 growth stages; CONTAINS InterPro DOMAIN/s: Phosphopantetheine-binding (InterPro:IPR006163), Acyl carrier protein-like (InterPro:IPR009081), Acyl carrier protein (ACP) (InterPro:IPR003231), Phosphopantethe…
AT3G44990	252607_at	0.0267773	0.0245568	7.4494e-05	0.0116159	0.0376655	0.717454	0.0311917	0.00456139	48.6995	2.13091	Arabidopsis thaliana	Exemplar	xyloglucan endo-transglycosylase ; supported by cDNA: gi_15810248_gb_AY056163.1_	---	xyloglucan endotransglycosylase, putative	---	AGI:At3g44990	---	---	4553 // hydrolase activity, hydrolyzing O-glycosyl compounds // extended:Unknown; Glyco_hydro_16; 4.6e-95	Glyco_hydro_16 // Glycosyl hydrolases family 16;4.6e-95	IPB000757 // Glycoside hydrolase family 16;3e-09	d1maca_ // b.29.1.2 // Bacillus 1-3,1-4-beta-glucanase;4.41e-63	---	EC:3.2.1.83 // CGKA_ALTCA KAPPA-CARRAGEENASE PRECURSOR (EC 3.2.1.83).;1.34e-73	15230574 // xyloglucan endotransglycosylase, putative protein id: At3g44990.1, supported by cDNA: gi_15810248 [Arabidopsis thaliana];e-178 /// 1769907 // xyloglucan endo-transglycosylase [Arabidopsis thaliana];e-177	protein_coding	xyloglucan endo-transglycosylase-related 8	xyloglucan endo-transglycosylase	xyloglucan endo-transglycosylase-related 8 (XTR8); FUNCTIONS IN: hydrolase activity, acting on glycosyl bonds, xyloglucan:xyloglucosyl transferase activity; INVOLVED IN: cell wall biogenesis; LOCATED IN: apoplast, cell wall; EXPRESSED IN: 11 plant structures; EXPRESSED DURING: 8 growth stages; CONTAINS InterPro DOMAIN/s: Xyloglucan endotransglucosylase/hydrolase (InterPro:IPR016455), Xyloglucan e…
AT1G21400	260900_s_at	0.000177232	3.11262e-06	0.00963357	0.00921271	0.987396	0.87331	0.166113	0.585428	47.7913	3.34039	Arabidopsis thaliana	Exemplar	'branched-chain alpha keto-acid dehydrogenase, putative similar to branched-chain alpha keto-acid dehydrogenase GB:AAC69851 GI:3822223 from [Arabidopsis thaliana]'	At1g21400:At5g34780 (2 transcripts, 2 gene clusters)	branched-chain alpha keto-acid dehydrogenase -related	---	AGI:At1g21400	---	---	16624 // oxidoreductase activity, acting on the aldehyde or oxo group of donors, disulfide as acceptor // extended:Unknown; E1_dehydrog; 5e-121	E1_dehydrog // Dehydrogenase E1 component;5e-121	IPB001017 // Dehydrogenase, E1 component;1.3e-74	d1dtwa1 // c.36.1.3 // Branched-chain alpha-keto acid dehydrogenase;7.82e-127	---	---	11357201 // branched-chain alpha keto-acid dehydrogenase E1 alpha chain [imported] - Arabidopsis thaliana (fragment);0.0 /// 15218984 // branched-chain alpha keto-acid dehydrogenase, putative protein id: At1g21400.1, supported by cDNA: gi_20466297 [Arabidopsis thaliana];0.0	protein_coding	Thiamin diphosphate-binding fold (THDP-binding) superfamily protein		Thiamin diphosphate-binding fold (THDP-binding) superfamily protein; FUNCTIONS IN: oxidoreductase activity, acting on the aldehyde or oxo group of donors, disulfide as acceptor, 3-methyl-2-oxobutanoate dehydrogenase (2-methylpropanoyl-transferring) activity; INVOLVED IN: metabolic process; EXPRESSED IN: guard cell; CONTAINS InterPro DOMAIN/s: Dehydrogenase, E1 component (InterPro:IPR001017); BEST…
AT5G18170	250032_at	8.26633e-06	0.618231	0.108563	0.00127891	0.0174781	0.0197302	0.126649	0.223796	47.035	2.13537	Arabidopsis thaliana	Exemplar	glutamate dehydrogenase (EC 1.4.1.-) 1 (pir||S71217) ; supported by cDNA: gi_15146203_gb_AY049243.1_	---	glutamate dehydrogenase (EC 1.4.1.-) 1 (pir||S71217)	---	AGI:At5g18170	---	---	4352 // glutamate dehydrogenase activity // extended:inferred from mutant phenotype; 1.4.1.2; 6.86e-143 /// 16491 // oxidoreductase activity // extended:Unknown; GLFV_dehydrog_N; 1.1e-55	GLFV_dehydrog // Glutamate/Leucine/Phenylalanine/Valin;3.2e-107 /// GLFV_dehydrog_N // Glu/Leu/Phe/Val dehydrogenase, dimeri;1.1e-55	IPB001625 // Glutamate/leucine/phenylalanine/valine dehydrogenase;3.3e-115	d1b26a1 // c.2.1.7 // Glutamate dehydrogenase;1.15e-77 /// d1b26a2 // c.58.1.1 // Glutamate dehydrogenase;1.43e-55	---	EC:1.4.1.2 // GUDB_BACSU NAD-SPECIFIC GLUTAMATE DEHYDROGENASE (EC 1.4.1.2) (NAD-GDH).;6.86e-143	15238762 // glutamate dehydrogenase (EC 1.4.1.-) 1 (pir: S71217) protein id: At5g18170.1, supported by cDNA: gi_1098959, supported by cDNA: gi_1293094, supported by cDNA: gi_15146203 [Arabidopsis thaliana];0.0 /// 15228667 // putative glutamate dehydrogenase protein id: At3g03910.1 [Arabidopsis thaliana];0.0	protein_coding	glutamate dehydrogenase 1	Encodes the 43 kDa alpha-subunit of the glutamate dehydrogenase with a putative mitochondrial transit polypeptide and NAD(H)- and alpha-ketoglutarate-binding domains. Mitochondrial localization confirmed by subcellular fractionation. Combines in several ratios with GDH2 protein (GDH-beta) to form seven isoenzymes. Catalyzes the cleavage of glycine residues. May be involved in ammonia assimilation…	glutamate dehydrogenase 1 (GDH1); FUNCTIONS IN: in 6 functions; INVOLVED IN: response to cadmium ion, response to salt stress, nitrogen compound metabolic process, response to absence of light; LOCATED IN: mitochondrion; EXPRESSED IN: 25 plant structures; EXPRESSED DURING: 13 growth stages; CONTAINS InterPro DOMAIN/s: Glutamate/phenylalanine/leucine/valine dehydrogenase (InterPro:IPR006095), Glut…
AT3G16670	258419_at	1.71364e-10	0.00348519	0.280733	0.59164	0.612088	0.439705	0.472843	0.873145	46.3666	2.60696	Arabidopsis thaliana	Exemplar	unknown protein	---	expressed protein	---	AGI:At3g16670	---	---	---	---	---	---	numtm:2;Nin-prob:0.96987;Type:SIGNAL;Span:TM from 29 to 51: Eval:0.57032/TM from 129 to 151: Eval:0.78778	---	11994620 // gene_id:MGL6.12~unknown protein [Arabidopsis thaliana];2e-42 /// 15228282 // unknown protein protein id: At3g16670.1, supported by cDNA: gi_20856563 [Arabidopsis thaliana];1e-81	protein_coding	Pollen Ole e 1 allergen and extensin family protein		Pollen Ole e 1 allergen and extensin family protein; FUNCTIONS IN: molecular_function unknown; INVOLVED IN: response to oxidative stress; LOCATED IN: endomembrane system; EXPRESSED IN: 9 plant structures; EXPRESSED DURING: 7 growth stages; CONTAINS InterPro DOMAIN/s: Pollen Ole e 1 allergen/extensin (InterPro:IPR006041); BEST Arabidopsis thaliana protein match is: Pollen Ole e 1 allergen and exte…
AT3G27400	257735_at	2.90956e-07	0.356349	0.870692	1.83179e-05	0.63371	0.962956	0.117558	0.288014	44.7344	2.17833	Arabidopsis thaliana	Exemplar	'pectate lyase, putative similar to pectate lyase GB:CAA70735 [Zinnia elegans] (Plant J. 13 (1), 17-28 (1998)); contains Pfam profile: PF00544 pectate lyase'	---	polysaccharide lyase family 1 (pectate lyase)	---	AGI:At3g27400	---	---	---	pec_lyase // Pectate lyase;1.2e-103	PR00807 // Pollen allergen Amb family signature;5.1e-124	d1bn8a_ // b.80.1.1 // Pectate lyase;2.98e-137	numtm:0;Nin-prob:0.82754;Type:SIGNAL;Span:	EC:4.2.2.2 // PEL_XANCM PECTATE LYASE PRECURSOR (EC 4.2.2.2) (PL) (PSTRU-3).;1.67e-128	15232153 // ;0.0 /// 7939512 // pectate lyase-like protein [Arabidopsis thaliana];0.0	protein_coding	Pectin lyase-like superfamily protein		Pectin lyase-like superfamily protein; FUNCTIONS IN: pectate lyase activity; INVOLVED IN: biological_process unknown; LOCATED IN: endomembrane system; EXPRESSED IN: 17 plant structures; EXPRESSED DURING: 11 growth stages; CONTAINS InterPro DOMAIN/s: Pectin lyase fold/virulence factor (InterPro:IPR011050), AmbAllergen (InterPro:IPR018082), Pectate lyase/Amb allergen (InterPro:IPR002022), Pectin ly…
AT5G38020	249567_at	0.155671	1.26362e-05	0.540052	0.00029252	0.115463	0.628242	0.131326	0.0147477	44.3807	2.35125	Arabidopsis thaliana	Exemplar	'SAMT-like protein S-adenosyl-L-methionine:salicylic acid carboxyl methyltransferase (SAMT)- Clarkia breweri, EMBL:AF133053'	---	S-adenosyl-L-methionine:carboxyl methyltransferase family	---	AGI:At5g38020	---	---	---	Methyltransf_7 // SAM dependent carboxyl methyltransfera;1.4e-190	---	---	---	---	8885604 // S-adenosyl-L-methionine:salicylic acid carboxyl methyltransferase-like [Arabidopsis thaliana];0.0 /// 15240823 // ;0.0	protein_coding	S-adenosyl-L-methionine-dependent methyltransferases superfamily protein	encodes a protein whose sequence is similar to SAM:salicylic acid carboxyl methyltransferase (SAMT) (GI:6002712)(Clarkia breweri) and to SAM:benzoic acid carboxyl methyltransferase (BAMT)(GI:9789277)(Antirrhinum majus)	S-adenosyl-L-methionine-dependent methyltransferases superfamily protein; CONTAINS InterPro DOMAIN/s: SAM dependent carboxyl methyltransferase (InterPro:IPR005299); BEST Arabidopsis thaliana protein match is: S-adenosyl-L-methionine-dependent methyltransferases superfamily protein (TAIR:AT3G21950.1); Has 1807 Blast hits to 1807 proteins in 277 species: Archae - 0; Bacteria - 0; Metazoa - 736; Fun…
AT3G47340	252415_at	0.0111027	2.93471e-06	0.0690775	0.000371737	0.572301	0.994003	0.350907	0.289257	44.2346	2.78281	Arabidopsis thaliana	Exemplar	glutamine-dependent asparagine synthetase ; supported by cDNA: gi_16930406_gb_AF419557.1_AF419557	---	glutamine-dependent asparagine synthetase	---	AGI:At3g47340	8152 // metabolism // extended:non-traceable author statement; GATase_2; 1.2e-60	---	4066 // asparagine synthase (glutamine-hydrolyzing) activity // extended:Unknown; 6.3.5.4; 8.98e-167	GATase_2 // Glutamine amidotransferases class-II;1.2e-60 /// Asn_synthase // Asparagine synthase;6.8e-205	IPB003694 // NAD+ synthase;0.0054	d1ct9a1 // c.26.2.1 // Asparagine synthetase B, C-terminal domain;6.62e-99 /// d1ct9a2 // d.153.1.1 // Asparagine synthetase B, N-terminal domain;3.29e-60	---	EC:6.3.5.4 // ASNS_HUMAN ASPARAGINE SYNTHETASE [GLUTAMINE-HYDROLYZING] (EC 6.3.5.4) (GLUTAMINE- DEPENDENT ASPARAGINE SYNTHETASE) (TS11 CELL CYCLE CONTROL PROTEIN).;8.98e-167	15232775 // glutamine-dependent asparagine synthetase protein id: At3g47340.1, supported by cDNA: gi_16930406, supported by cDNA: gi_18176385, supported by cDNA: gi_20465518, supported by cDNA: gi_507945 [Arabidopsis thaliana];0.0 /// 11136554 // asparagine synthetase [Raphanus sativus];0.0	protein_coding	glutamine-dependent asparagine synthase 1	encodes a glutamine-dependent asparagine synthetase, the predicted ASN1 peptide contains a purF-type glutamine-binding domain, and is expressed predominantly in shoot tissues, where light has a negative effect on its mRNA accumulation. Expression is induced within 3 hours of dark treatment, in senescing leaves and treatment with exogenous photosynthesis inhibitor. Induction of gene expression was…	glutamine-dependent asparagine synthase 1 (ASN1); CONTAINS InterPro DOMAIN/s: Rossmann-like alpha/beta/alpha sandwich fold (InterPro:IPR014729), Asparagine synthase (InterPro:IPR001962), Asparagine synthase, glutamine-hydrolyzing (InterPro:IPR006426), Glutamine amidotransferase, type II (InterPro:IPR017932); BEST Arabidopsis thaliana protein match is: asparagine synthetase 2 (TAIR:AT5G65010.1); H…
AT2G29500	266294_at	2.90248e-05	0.00526437	0.903518	0.00268661	0.0038866	0.497864	0.965121	0.444168	41.5637	2.16492	Arabidopsis thaliana	Exemplar	putative small heat shock protein ;supported by full-length cDNA: Ceres:25828.	---	small heat shock protein -related	---	AGI:At2g29500	---	---	---	HSP20 // Hsp20/alpha crystallin family;4.5e-53	IPB002068 // Heat shock hsp20 (alpha crystallin) proteins family;5.5e-19	d1gmea_ // b.15.1.1 // Small heat shock protein;1.21e-45	---	---	15222395 // heat shock protein, putative protein id: At1g07400.1, supported by cDNA: 28602. [Arabidopsis thaliana];2e-67 /// 15227552 // putative small heat shock protein protein id: At2g29500.1, supported by cDNA: 25828. [Arabidopsis thaliana];5e-83	protein_coding	HSP20-like chaperones superfamily protein		HSP20-like chaperones superfamily protein; CONTAINS InterPro DOMAIN/s: Heat shock protein Hsp20 (InterPro:IPR002068), HSP20-like chaperone (InterPro:IPR008978); BEST Arabidopsis thaliana protein match is: HSP20-like chaperones superfamily protein (TAIR:AT1G07400.1); Has 6873 Blast hits to 6873 proteins in 1575 species: Archae - 184; Bacteria - 4083; Metazoa - 80; Fungi - 309; Plants - 1622; Virus…
AT4G35725	253164_at	0.517461	0.927163	0.0145103	1.72873e-07	0.367061	0.859399	0.469781	0.00678998	39.587	2.39973	Arabidopsis thaliana	Exemplar	Expressed protein ; supported by full-length cDNA: Ceres: 4745.	---	expressed protein	---	AGI:At4g35725	---	---	---	---	---	---	numtm:0;Nin-prob:0.62532;Type:SIGNAL;Span:	---	18419613 // Expressed protein protein id: At4g35725.1, supported by cDNA: 4745. [Arabidopsis thaliana];1e-67	protein_coding			unknown protein; FUNCTIONS IN: molecular_function unknown; INVOLVED IN: biological_process unknown; LOCATED IN: endomembrane system; EXPRESSED IN: embryo, sepal; EXPRESSED DURING: 4 anthesis, C globular stage; Has 30201 Blast hits to 17322 proteins in 780 species: Archae - 12; Bacteria - 1396; Metazoa - 17338; Fungi - 3422; Plants - 5037; Viruses - 0; Other Eukaryotes - 2996 (source: NCBI BLink).
psaJ	244967_at	5.49875e-09	0.561238	0.278791	0.807065	0.498928	0.177689	0.0533726	0.508639	39.1223	2.32843	Arabidopsis thaliana	Exemplar	PSI J protein	---	---	---	---	---	---	---	---	---	---	---	---	---	NA	NA	NA	NA
psbA	245047_at	3.9416e-07	0.395492	0.301504	0.18731	0.0113409	0.404323	0.221724	0.198181	39.0363	2.06387	Arabidopsis thaliana	Exemplar	PSII 32 KDa protein	---	---	---	---	---	---	---	---	---	---	---	---	---	NA	NA	NA	NA
AT5G24780	245928_s_at	1.13364e-07	0.0748224	0.535021	0.0295557	0.827211	0.26957	0.10896	0.671835	38.7326	2.89454	Arabidopsis thaliana	Exemplar	vegetative storage protein Vsp1 ;supported by full-length cDNA: Ceres:32606.	At5g24780:At5g24770 (2 transcripts, 2 gene clusters)	vegetative storage protein Vsp1	---	AGI:At5g24780	---	---	---	acid_phosphat_B // Acid phosphatase (Class B);3.5e-112	---	---	---	---	18206363 // Vegetative storage protein 1 precursor;e-155 /// 18420838 // vegetative storage protein Vsp1 protein id: At5g24780.1, supported by cDNA: 32606., supported by cDNA: gi_14423385, supported by cDNA: gi_14994268, supported by cDNA: gi_18377509, supported by cDNA: gi_2373396 [Arabidopsis thaliana];e-155	protein_coding	vegetative storage protein 1	encodes an acid phosphatase similar to soybean vegetative storage proteins. Gene expression is induced by wounding and jasmonic acid.	vegetative storage protein 1 (VSP1); FUNCTIONS IN: transcription factor binding, acid phosphatase activity; INVOLVED IN: response to jasmonic acid stimulus, response to wounding, defense response; LOCATED IN: vacuole; EXPRESSED IN: fruit, gynoecium, valve; CONTAINS InterPro DOMAIN/s: Acid phosphatase (Class B) (InterPro:IPR005519), Vegetative storage protein/acid phosphatase (InterPro:IPR014403),…
AT1G14120	262608_at	0.000973546	0.000833161	0.455585	0.00103396	0.46472	0.998517	0.190236	0.0982161	38.1351	2.21276	Arabidopsis thaliana	Exemplar	'dioxygenase-like protein very similar to adventitious rooting related oxygenase; Very similar to 2-oxoacid dependent dioxygenase from Malus domestica, gi|3492806;supported by full-length cDNA: Ceres:14139.'	---	2-oxoglutarate-dependent dioxygenase, putative	---	AGI:At1g14120	---	---	---	2OG-FeII_Oxy // 2OG-Fe(II) oxygenase superfamily;1.7e-23	PR00682 // Isopenicillin N synthase signature;0.00064	---	---	EC:1.14.11.9 // FL3H_VITVI NARINGENIN,2-OXOGLUTARATE 3-DIOXYGENASE (EC 1.14.11.9) (FLAVONONE- 3-HYDROXYLASE) (F3H) (FHT).;6.61e-72	15223094 // dioxygenase-like protein protein id: At1g14120.1, supported by cDNA: 14139. [Arabidopsis thaliana];e-180 /// 15223096 // dioxygenase-like protein protein id: At1g14130.1 [Arabidopsis thaliana];e-132	protein_coding	2-oxoglutarate (2OG) and Fe(II)-dependent oxygenase superfamily protein		2-oxoglutarate (2OG) and Fe(II)-dependent oxygenase superfamily protein; FUNCTIONS IN: oxidoreductase activity, acting on paired donors, with incorporation or reduction of molecular oxygen, 2-oxoglutarate as one donor, and incorporation of one atom each of oxygen into both donors, oxidoreductase activity; INVOLVED IN: biological_process unknown; LOCATED IN: cellular_component unknown; EXPRESSED I…
AT1G10585	263210_at	0.441701	1.48077e-07	0.420162	0.757901	0.00682545	0.270954	0.120681	0.752071	38.0574	2.30226	Arabidopsis thaliana	Exemplar	Expressed protein ; supported by cDNA: gi_15293050_gb_AY050959.1_	---	expressed protein	---	AGI:At1g10585	---	---	---	---	---	---	---	---	18391177 // Expressed protein protein id: At1g10585.1, supported by cDNA: gi_15293050 [Arabidopsis thaliana];5e-62 /// 5091553 // T10O24.22 [Arabidopsis thaliana];6e-60	protein_coding	basic helix-loop-helix (bHLH) DNA-binding superfamily protein		basic helix-loop-helix (bHLH) DNA-binding superfamily protein; FUNCTIONS IN: sequence-specific DNA binding transcription factor activity; INVOLVED IN: regulation of transcription; LOCATED IN: nucleus; EXPRESSED IN: 7 plant structures; EXPRESSED DURING: LP.06 six leaves visible, 4 anthesis, LP.10 ten leaves visible, petal differentiation and expansion stage, LP.08 eight leaves visible; CONTAINS In…
AT2G42540	263497_at	5.55454e-07	0.242151	0.796508	0.586956	0.00490725	0.845095	0.0226537	0.827777	37.5732	2.29342	Arabidopsis thaliana	Exemplar	cold-regulated protein cor15a precursor ; supported by cDNA: gi_14532457_gb_AY039853.1_	---	cold-regulated protein (cor15a)	---	AGI:At2g42540	---	---	---	---	---	---	---	---	15227963 // cold-regulated protein cor15a precursor protein id: At2g42540.1, supported by cDNA: gi_14532457, supported by cDNA: gi_16323072 [Arabidopsis thaliana];3e-71 /// 15227952 // cold-regulated protein cor15b precursor protein id: At2g42530.1, supported by cDNA: 19221., supported by cDNA: gi_15027904, supported by cDNA: gi_20259286 [Arabidopsis thaliana];4e-52	protein_coding	cold-regulated 15a	A cold-regulated gene whose product is targeted to the chloroplast. Cor15am protects stromal proteins from aggregation under various stress conditions. Constitutive expression increases freezing tolerance in protoplasts in vitro and chloroplasts in vivo. NMR and x-ray diffraction studies suggest that COR15a alters the intrinsic curvature of the inner membrane of chloroplast envelope. Late Embryog…	cold-regulated 15a (COR15A); FUNCTIONS IN: molecular_function unknown; INVOLVED IN: in 9 processes; LOCATED IN: chloroplast stroma, chloroplast, chloroplast envelope; EXPRESSED IN: 21 plant structures; EXPRESSED DURING: 13 growth stages; BEST Arabidopsis thaliana protein match is: cold regulated 15b (TAIR:AT2G42530.1); Has 189 Blast hits to 128 proteins in 40 species: Archae - 0; Bacteria - 9; Me…
AT1G59860	262911_s_at	0.00073018	0.00023118	0.354681	0.025428	0.0573217	0.336712	0.855333	0.765329	35.5975	2.01594	Arabidopsis thaliana	Exemplar	'heat shock protein, putative similar to heat shock protein GI:19617 from [Medicago sativa];supported by full-length cDNA: Ceres:32795.'	At1g59860:At1g07400 (2 transcripts, 2 gene clusters)	heat shock protein, putative	---	AGI:At1g59860	---	---	---	HSP20 // Hsp20/alpha crystallin family;4.2e-53	IPB002068 // Heat shock hsp20 (alpha crystallin) proteins family;1.7e-16	d1gmea_ // b.15.1.1 // Small heat shock protein;7.41e-43	---	---	15218934 // heat shock protein, putative protein id: At1g59860.1, supported by cDNA: 32795. [Arabidopsis thaliana];2e-84 /// 21592809 // heat shock protein, putative [Arabidopsis thaliana];7e-84	protein_coding	HSP20-like chaperones superfamily protein		HSP20-like chaperones superfamily protein; CONTAINS InterPro DOMAIN/s: Heat shock protein Hsp20 (InterPro:IPR002068), HSP20-like chaperone (InterPro:IPR008978); BEST Arabidopsis thaliana protein match is: HSP20-like chaperones superfamily protein (TAIR:AT1G07400.1); Has 7002 Blast hits to 7001 proteins in 1594 species: Archae - 206; Bacteria - 4112; Metazoa - 148; Fungi - 313; Plants - 1631; Viru…
AT3G28310	256602_at	0.0474417	0.830081	0.496133	2.40357e-08	0.600743	0.826591	0.838644	0.174621	34.7693	2.38818	Arabidopsis thaliana	Exemplar	unknown protein	---	hypothetical protein	---	AGI:At3g28310	---	---	---	---	---	---	---	---	11994577 // contains similarity to unknown protein~gb: AAD26355.1~gene_id:MZF16.11 [Arabidopsis thaliana];2e-30 /// 15232950 // ;3e-53	protein_coding	Protein of unknown function (DUF677)		Protein of unknown function (DUF677); CONTAINS InterPro DOMAIN/s: Protein of unknown function DUF677 (InterPro:IPR007749); BEST Arabidopsis thaliana protein match is: Protein of unknown function (DUF677) (TAIR:AT3G28290.1); Has 57 Blast hits to 57 proteins in 3 species: Archae - 0; Bacteria - 0; Metazoa - 0; Fungi - 0; Plants - 57; Viruses - 0; Other Eukaryotes - 0 (source: NCBI BLink).
